# Supplementary material for: A Multivariate Genome-Wide Association Study Reveals Neural Correlates and Common Biological Mechanisms of Psychopathology Spectra
Source: Research Square preprint supplement (doi:10.21203/rs.3.rs-4228593/v1), 2024-04-08
Supplement: Supplementary file 1 [file 1e15ba6446af69d29033ef0b.xlsx]

## Sheet: Contents
Supplementary Table Contents
Supplementary Table 1.		List of included summary statistics and cohorts.
Supplementary Table 2.		Results for SNPs with heterogenous effects across the externalizing spectrum.
Supplementary Table 3.		Lead SNPs for the externalizing spectrum.
Supplementary Table 4.		Significant PheWAS results for novel externalizing lead SNPs.
Supplementary Table 5.		Results for SNPs with heterogenous effects across the internalizing spectrum.
Supplementary Table 6.		Lead SNPs for the internalizing spectrum.
Supplementary Table 7.		PheWAS results for novel internalizing lead SNP: rs1381763.
Supplementary Table 8.		Results for SNPs with heterogenous effects across the second-order externalizing and internalizing spectrum.
Supplementary Table 9.		Lead SNPs for the second-order externalizing and internalizing spectrum.
Supplementary Table 10.		Genes identified by MAGMA as being significantly associated with the externalizing spectrum.
Supplementary Table 11.		Results of gene-set enrichment analyses.
Supplementary Table 12.		Genes identified by MAGMA as being significantly associated with the internalizing spectrum.
Supplementary Table 13.		Genes identified by MAGMA as being significantly associated with the second-order externalizing and internalizing spectrum.
Supplementary Table 14.		Significant results from TWAS of externalizing spectrum across 13 brain tissues.
Supplementary Table 15.		Significant results from TWAS of internalizing spectrum across 13 brain tissues.
Supplementary Table 16.		Significant results from TWAS of second-order externalizing and internalizing spectrum across 13 brain tissues.
Supplementary Table 17.		Significant results from TWAS of externalizing spectrum using PsychENCODE samples.
Supplementary Table 18.		Significant results from TWAS of internalizing spectrum using PsychENCODE samples.
Supplementary Table 19.		Significant results from TWAS of the second-order externalizing and internalizing spectrum using PsychENCODE samples.
Supplementary Table 20.		BrainXcan results for externalizing GWAS.
Supplementary Table 21.		BrainXcan results for internalizing GWAS.
Supplementary Table 22.		BrainXcan results for second-order externalizing and internalizing GWAS.
Supplementary Table 23.		Results of Mendelian Randomization analyses for the top 5 BrainXcan image-derived phenotypes associated with the externalizing spectrum.
Supplementary Table 24.		Results of Mendelian Randomization analysis for the significant BrainXcan image-derived phenotype associated with the internalizing spectrum.
Supplementary Table 25.		Results of Mendelian Randomization analyses for the top 5 BrainXcan image-derived phenotypes associated with the second-order externalizing and internalizing spectrum.
Supplementary Table 26.		Drug repurposing results for the externalizing spectrum.
Supplementary Table 27.		Drug repurposing results for internalizing spectrum.
Supplementary Table 28.		Drug repurposing results for the second-order externalizing and internalizing spectrum.
Supplementary Table 29.		Significant genetic correlations with the externalizing spectrum.
Supplementary Table 30.		Significant genetic correlations with the internalizing spectrum.
Supplementary Table 31.		Significant genetic correlations with the second-order externalizing and internalizing spectrum.
Supplementary Table 32.		Results of Mendelian Randomization analyses predicting health outcomes from psychopathology.

## Sheet: ST1
Supplementary Table 1. List of included summary statistics and cohorts.
Phenotype	Study	Sample size	Sample design	Cohorts
Irritability	http://www.nealelab.is/uk-biobank/	96862 / 248369	binary	UKBiobank
PTSD	Stein et al. 2021	36301 / 178107	case-control	MVP
Major Depression	Als et al. 2022	387429 / 976554	case-control
		29158 / 38142		iPSYCH2015
		28098 / 228817		FinnGen
		83810 / 166405		MVP
		75607 / 213747		23andMe
		127552 / 233763		UK Biobank
		43204 / 95680		PGC29 (as reported in Wray et al., 2018; excl. iPSYCH2012)
Anorexia Nervosa	Watson et al. 2019	16992 / 55525	case-control
		1040 / 4533		CHOP, USA
		2704 / 8650		GCAN/WTCCC3
		5019 / 25168		ANGI-DK
		2691 / 17158		ANGI-ANZ/QSkin
		1406 / 1538		ANGI-US
		4247 / 4035		ANGI-SE
		768 / 3072		UKBiobank
Loneliness	Abdellaoui et al. 2019	490689	mix of binary and continuous
		81011 / 367945		UKBiobank
		7556		Health & Retirement Study
		11046		Netherlands Twin Register
		15367		Swedish Twin Registry
		7764		Rotterdam Study
Subjective wellbeing	Okbay et al. 2016	298420	continuous
		3044		AGES
		5654		ALSPAC
		585		EGCUTOMNI
		1110		EGCUT370
		1343		HNRSoexpr
		773		HNRSomni1
		9942		HRS
		8060		NTR
		370		RUSHMAP
		2148		TEDS
		1204		TRAILS
		1711		YFS
		2034		1958T1D
		2196		1958WTC
		1392		BASE
		854		HPFSCHD
		478		HPFSKS
		1653		HPFST2D
		827		KORAF3
		660		KORAF4
		2268		NHSBRCA
		1116		NHSCHD
		490		NHSKS
		3071		NHST2D
		815		ASPS
		517		AEGS1
		827		BLSA
		3530		Colaus
		876		CROATIAKOR
		495		CROATIASPL
		918		CROATIAVIS
		10384		DECODE
		879		DHS
		2129		ERF
		685		FTC
		1805		FTC2014
		1450		HBCS
		1906		HCS
		11971		LL
		7007		MCTFR
		2495		MESA
		5715		NEO
		6572		QIMR
		1235		QIMR2
		3731		RSI
		2039		RSII
		2027		RSIII
		2542		SAR
		9343		STR1
		4704		STR2
		3484		TwinsUK
		40543		UKB
		5203		NFBC
		93454		23andMe
		8716		ARIC
		5047		ELSA
		1179		GOYA
		443		LBC21
		789		LBC36
Miserableness	UKB	151752 / 203430	binary	UKBiobank
Anxiety (MTAG)		280490
	Study 1: Otowa et al., 2016	7016 / 14745	case-control & factor scores
		757 / 1059		MGS
		1044 / 1351		PsyCoLaus
		1112 / 5459		Rotterdam Study
		581 / 890		SHIP
		1611 / 2544		QIMR
		390 / 472		TRAILS
		1521 / 2970		NESDA & NTR
	Study 2: Levey et al., 2020	175163	continuous	MVP
	Study 3: Purves et al., 2020	25453 / 58113	case-control	UKBiobank
ADHD	Demontis et al. 2023	38691 / 186,843	case-control
		17019 / 21880		iPSYCH1
		8876 / 15268		iPSYCH2
		8281 / 137993		deCODE
				PGC:
		572 / 425		Barcelona, Spain
		295 / 202		Bergen, Norway
		721 / 5,081		Cardiff, UK
		262 / 262		CHOP, USA
		487 / 1290		Germany
		700 / 700		IMAGE-I
		624 / 1755		IMAGE-II
		563 / 563		PUWMa
		109 / 109		Toronto, Canada
		182 / 1315		Yale-Penn
Age at first sexual intercourse	http://www.nealelab.is/uk-biobank/	317694	continuous	UKBiobank
General risk tolerance	Karlsson Linner et al. 2019	112093 / 319033	binary	UKBiobank
Number of sexual partners	Karlsson Linner et al. 2019	370711	continuous	UKBiobank
Antisocial behavior	Tielbeek et al. 2018	16400	continuous
		4336		ALSPAC
		1379		COGA
		1420		GENR
		2734		TEDS
		6531		QIMR
Automobile speeding propensity	Karlsson Linner et al. 2019	404291	ordinal	UKBiobank
Alcohol Use Disorder	Zhou et al., 2023	113325 / 639923	case-control
		80028 / 363113		MVP
		8866 / 209926		FinnGen
		9938 / 30992		PGC
		6726 / 4467		QIMR
		2772 / 5630		QIMR Twins
		1287 / 751		QIMR Genetics of Bipolar Disorder Study
		2117 / 13238		iPSYCH1
		1024 / 5732		iPSYCH2
		567 / 1074		Yale-Penn 3
Cannabis Use Disorder	Levey et al., 2023	42281 / 843744	case-control
		22260 / 423587		MVP
		14522 / 298941		PGC (excl. iPSYCH)
		4733 / 95657		iPSYCH
		310 / 1471		Yale-Penn 3
		456 / 24088		MGH Partners BioBank
Opioid Use Disorder	Kember et al., 2022	31473 / 394471	case-control	MVP
Tobacco Use Disorder	Toikumo et al., 2023	163734 / 331271	case-control
		7167 / 39738		BioVu
		6708 / 15560		MGBB
		3088 / 25911		PMBB
		146771 / 250062		MVP

## Sheet: ST2
Supplementary Table 2. Results for SNPs with heterogenous effects across the externalizing spectrum.
SNP	CHR	BP	ADHD_p	AgeSex_p	ASB_p	AUD_p	CanUD_p	OUD_p	Risk_p	NumSex_p	TUD_p	EXT_p	Q_Pval
rs10018066	4	67961296	0.03951	1.44321e-05	0.361	0.4595	0.143	0.609495	0.4728	0.007108	0.007705	0.00359258	1.62e-14
rs10093604	8	51116472	0.1222	5.45984e-11	0.6424	0.6344	0.3415	0.540784	0.01199	1.864e-06	0.015	7.99757e-08	2.87e-09
rs10099704	8	34339520	0.02674	1.13925e-05	0.6907	0.0005731	0.7896	0.874303	0.7619	0.006578	0.001083	0.744119	2.85e-13
rs10124636	9	14442529	5.856e-07	1.40423e-06	0.04133	0.00562	0.003939	0.0310875	0.1995	0.06645	9.447e-06	1.20151e-11	2.75e-09
rs10166311	2	162867613	0.3884	0.0339161	0.2216	0.7406	0.8282	0.0381247	0.01795	0.04081	1.734e-07	0.363659	3.05e-09
rs10189240	2	144484493	0.00234	2.40419e-05	0.002609	0.5514	0.6245	0.582286	0.332	0.1234	0.09784	0.0704419	8.21e-17
rs10212155	3	117785505	9.782e-06	5.6282e-11	0.7282	0.09293	0.03486	0.218665	0.3685	7.701e-07	1.624e-05	2.15665e-11	4.18e-12
rs10249234	7	114129137	3.195e-10	1.22323e-14	0.008563	3.362e-05	1.228e-07	0.0860694	7.905e-13	1.989e-13	0.0441	1.28965e-34	3.54e-10
rs10427255	2	146125523	6.739e-05	0.473517	0.6713	0.8429	0.002909	0.70766	0.01702	0.9802	2.843e-18	0.000100241	9.25e-09
rs10506694	12	74904410	0.0023	2.94264e-05	0.5993	0.3022	0.000242	0.84089	0.02071	0.0001834	1.004e-05	7.33226e-10	6.84e-10
rs1051431	12	123645803	3.499e-06	3.57453e-07	0.3216	0.3932	0.03714	0.898769	0.4832	0.5337	0.6772	0.0302721	1.02e-08
rs10777827	12	97365332	0.5764	1.85507e-06	0.001211	0.2102	0.09965	0.209157	0.5236	0.0002956	0.3273	0.0872981	3.57e-09
rs10783854	12	58244630	0.5677	0.658026	0.1198	0.1089	0.07512	0.154291	0.17	0.3044	1.468e-09	0.408724	1.54e-09
rs10803132	1	243437266	0.05519	0.357748	0.2281	0.7208	0.1138	0.553396	4.398e-10	2.61e-05	0.1031	0.00764067	2.23e-08
rs10813222	9	3015465	0.02201	0.00370511	0.8981	0.1515	0.03942	0.353917	0.04474	0.008588	2.958e-07	0.000430241	7.84e-13
rs1085640	2	145908327	9.335e-05	0.00202374	0.259	0.001015	0.0008714	0.344281	0.2925	0.5834	2.982e-06	2.18281e-07	2.37e-11
rs10879731	12	74458646	0.1939	0.029628	0.004208	0.7349	0.009006	0.501328	0.2197	2.493e-05	6.794e-08	0.71927	3.54e-08
rs10884071	10	106731970	5.246e-07	1.81116e-08	0.3662	0.05714	0.252	0.527225	0.006344	0.0009911	0.02473	4.48628e-11	1.87e-12
rs10946808	6	26233387	0.2093	0.00579939	0.4845	0.002363	0.1272	0.292171	0.3661	0.001656	3.126e-10	0.000614602	1.98e-11
rs10953957	7	121954709	0.0001663	0.000445019	0.5913	0.5093	0.8837	0.119557	6.923e-05	8.404e-08	0.9362	4.99188e-06	1.1e-19
rs10954922	8	33530099	0.06286	0.0590275	0.5553	0.002737	0.1734	0.361305	1.978e-06	0.007002	0.3882	0.0469633	1.52e-09
rs11022750	11	13307594	0.3849	0.000406295	0.1608	0.6449	0.2049	0.306781	0.003805	0.0003403	0.2763	0.0474873	2.42e-08
rs11030084	11	27643725	0.004482	2.21825e-06	0.1142	5.826e-05	0.01845	0.513686	1.696e-05	9.301e-06	1.912e-09	5.08013e-18	1.1e-12
rs11030119	11	27728102	2.027e-05	4.47921e-07	0.4236	0.005609	0.01864	0.955369	0.001209	0.0001609	4.306e-07	2.89244e-15	1.59e-16
rs1108581	9	136505241	0.6664	0.292322	0.8268	0.04101	0.2911	0.0874207	0.1281	0.01038	1.613e-10	0.0767666	1.55e-09
rs11192193	10	106569253	6.051e-07	4.4333e-13	0.8916	0.1336	0.1118	0.923288	0.006229	0.0001496	3.514e-05	1.60524e-14	6.02e-10
rs11210887	1	44076019	9.195e-15	5.66267e-07	0.5974	0.001066	2.54e-05	0.366451	0.0006957	1.176e-09	1.274e-07	2.92965e-23	3.56e-20
rs11242527	5	103937960	1.675e-06	5.74546e-05	0.1746	0.01004	0.0003378	0.419238	0.008976	7.431e-10	0.8856	3.49771e-13	4.89e-11
rs11250099	8	10818657	0.003173	9.16898e-15	0.6508	0.6717	0.06394	0.0135115	7.068e-06	1.399e-09	0.0004602	6.27807e-17	1.88e-08
rs1155397	7	114953597	0.2834	0.0422166	0.2728	4.637e-11	0.00121	0.097948	0.00252	1.497e-06	8.529e-08	8.3885e-13	1.17e-13
rs11588857	1	204587047	0.3252	1.79751e-06	0.5289	0.05187	0.7552	0.697369	0.02894	2.958e-06	9.623e-11	2.17812e-06	1.65e-17
rs11643079	16	49619863	0.007127	1.03818e-08	0.4996	0.4519	0.4727	0.0395935	0.1302	9.43e-12	0.5221	1.84991e-09	3.77e-08
rs11648113	16	5823677	0.002259	2.42558e-08	0.1826	0.5707	0.2956	0.357302	0.00642	0.02945	0.02501	0.00442615	4.86e-08
rs11682446	2	208263699	0.9498	0.0390676	0.3259	8.665e-05	0.4139	0.591616	0.001312	0.0001076	4.664e-07	0.874497	4.16e-09
rs11709773	3	77243792	5.207e-06	0.000141172	0.337	0.3888	0.08396	0.275789	0.8746	9.282e-05	0.0006328	3.23455e-07	3.44e-14
rs11710798	3	48570686	0.0001316	4.1515e-14	0.2236	0.0006425	0.07637	0.0076515	0.5136	0.3943	6.66e-07	3.79505e-14	2.54e-10
rs11716246	3	51484914	0.518	0.00739303	0.03164	0.0349	0.06629	0.804067	1.457e-05	0.1436	8.868e-05	0.145805	3.17e-09
rs11720703	3	71060640	0.05832	0.00229922	0.9876	0.008129	2.451e-05	0.479588	0.001496	6.077e-12	2.126e-07	1.21964e-14	7.85e-13
rs11729080	4	112503872	8.22e-10	4.4696e-16	0.217	3.159e-05	0.002146	1.97285e-05	0.7864	9.282e-05	2.391e-06	8.99604e-22	1.93e-08
rs11773627	7	2002733	6.143e-06	0.131859	0.109	0.963	0.9008	0.298169	0.0006508	0.003702	0.0002391	0.680307	1.16e-18
rs11783093	8	27425349	0.01815	0.0638451	0.5995	0.0004437	1.28e-13	0.518929	0.4656	4.696e-05	1.277e-23	0.000388123	3.54e-08
rs11811423	1	74124131	0.3806	0.0379686	0.2379	0.08667	0.6405	0.902381	0.001451	9.51e-05	0.0002986	0.983115	1.84e-08
rs11892997	2	77295731	0.7033	0.670303	0.1921	0.1048	0.0961	0.927316	0.1464	1.079e-09	0.1783	0.0550321	2.48e-08
rs11894121	2	205202230	0.03278	6.79723e-07	0.2479	0.6089	0.04887	0.672248	3.013e-05	0.891	0.9735	3.39591e-05	1.03e-09
rs11996715	8	141647291	0.007725	5.50725e-05	0.08808	0.8441	0.001247	0.88399	0.5265	0.001221	2.368e-05	1.69033e-06	1.94e-08
rs12064743	1	174465784	0.004037	0.0103123	0.8571	0.01231	0.2532	0.0388114	0.01448	0.004023	0.000113	0.0546829	4.37e-08
rs12124902	1	72579373	0.459	0.864265	0.1094	2.802e-05	0.0368	0.0111086	0.01227	9.821e-08	0.0005152	0.182482	4.45e-09
rs12134600	1	72635996	0.3111	0.00868936	0.5087	0.0001976	0.3876	0.503031	0.03354	1.203e-05	0.002495	0.049439	6.08e-09
rs12147822	14	41059974	0.4115	1.29243e-12	0.8632	0.1061	0.1922	0.628894	0.1444	8.47e-06	0.0008455	0.0644821	1.14e-08
rs12214995	6	67506253	0.2067	3.05476e-12	0.8679	0.1133	0.009068	0.276718	0.06786	0.0008046	3.853e-07	3.32136e-11	1.51e-08
rs12401813	1	44263415	8.841e-06	0.000163666	0.1412	0.04772	0.03368	0.12768	0.4097	0.09905	4.611e-08	1.48425e-08	3.17e-10
rs12473342	2	63942784	0.002482	3.139e-06	0.8413	0.5129	0.01339	0.568002	0.01164	0.00413	3.711e-05	1.92784e-08	6.13e-10
rs12487215	3	86254241	0.002121	1.82706e-10	0.07302	0.1883	0.1786	0.453334	1.254e-05	1.277e-07	0.1819	9.88962e-12	4.2e-09
rs12495178	3	85886077	0.00121	8.05176e-13	0.7971	0.03296	0.001257	0.0709814	1.908e-10	0.001068	0.4707	8.37092e-18	4.52e-09
rs12495822	3	94048469	0.002183	1.74949e-07	0.5278	0.3353	0.5345	0.344446	0.04706	1.03e-06	0.4647	1.42634e-05	2.93e-27
rs12521953	5	45249513	0.0001352	3.60163e-12	0.6033	0.5239	0.0275	0.98251	0.2426	0.0006616	0.0005859	6.83273e-10	9.06e-09
rs12534625	7	137067616	0.3914	0.0248042	0.8199	0.2948	0.8759	0.690162	3.009e-05	0.002736	1.405e-05	0.255565	2.32e-08
rs12594247	15	78946633	0.09918	0.089851	0.7862	0.0213	0.2689	0.326425	0.2697	3.656e-05	1.533e-08	0.022612	1.07e-13
rs12601661	17	50296779	0.001085	0.619969	0.1562	0.3021	0.7216	0.645226	0.3488	0.000318	1.242e-08	0.198117	4.11e-08
rs12620940	2	58311684	0.9541	0.000409916	0.8569	8.002e-09	0.001587	0.00310471	0.422	0.002736	0.0007725	0.00429345	1.89e-10
rs12640095	4	47145034	0.01114	0.00765388	0.002412	0.2409	7.13e-06	0.191189	0.02806	3.079e-06	0.1957	2.2711e-08	9.62e-10
rs12714592	3	84387950	0.7253	6.29185e-16	0.7196	0.9306	0.06794	0.623833	0.01484	5.726e-06	0.0312	2.09758e-09	9.68e-14
rs12768641	10	134966154	6.956e-05	0.00157612	0.3272	0.1724	0.04853	0.199096	0.08126	0.1001	2.731e-05	0.00290721	4.82e-12
rs12769314	10	134148961	3.392e-06	2.63496e-08	0.3986	0.2177	0.00862	0.111296	0.002731	4.166e-06	0.01842	4.58545e-13	2.31e-08
rs12774555	10	104697707	0.0006918	7.14517e-07	0.9399	0.02691	0.1086	0.3617	2.058e-06	5.846e-06	3.618e-07	6.97097e-16	2.27e-14
rs12917367	15	47677087	0.0005076	1.0073e-18	0.7961	1.087e-10	0.002624	0.242619	0.02844	1.49e-08	2.983e-08	8.55624e-30	1.65e-10
rs12945877	17	16238203	0.4782	0.0162046	0.9337	0.001944	0.3386	0.0473033	1.629e-07	0.1436	0.01875	0.0531298	3.24e-08
rs13067741	3	114164156	0.4811	0.0253317	0.06683	7.51e-06	1.167e-05	0.431374	0.003707	0.3943	8.163e-12	1.11844e-05	3.03e-10
rs13199524	6	32066765	0.104	2.76771e-06	0.8005	0.1842	0.7695	0.878192	0.07049	0.6132	0.0009328	0.0109366	1.03e-11
rs13225346	7	1866916	5.425e-06	4.24809e-13	0.3379	0.1077	0.1588	0.989422	0.01552	0.01698	1.48e-06	3.49226e-08	1.11e-09
rs13230911	7	2203369	0.003798	7.24366e-08	0.5245	0.5083	0.02839	0.531602	0.05811	0.7423	0.1928	0.00412977	1.92e-17
rs1347254	11	28994170	0.00982	0.29588	0.009542	0.01415	2.093e-06	0.0125214	0.0002713	0.1133	6.868e-05	7.2484e-10	5.64e-12
rs1352162	1	243717682	0.0008144	0.550002	0.9051	0.01795	6.628e-05	0.284707	2.324e-09	2.827e-07	0.08324	3.93756e-12	1.74e-09
rs1391439	4	106151642	0.4335	0.714021	0.9231	0.156	0.1709	0.177074	5.843e-07	1.051e-09	0.005635	0.0224723	6.75e-10
rs1435749	15	47845973	6.647e-07	4.59042e-12	0.2804	0.01968	0.009866	0.466454	0.008677	0.02115	5.455e-15	1.10286e-17	5.82e-12
rs1438898	2	145714354	4.877e-09	0.0252447	0.1974	0.05014	0.0001484	0.0957525	5.335e-05	0.002521	0.001668	3.40507e-12	5.17e-35
rs1444492	8	93246084	1.29e-05	0.000337873	0.6411	0.0611	0.01768	0.25484	0.9008	0.001221	0.4635	0.00587606	2.41e-08
rs1447373	4	30832836	0.8212	0.493832	0.2263	0.002348	0.8763	0.820763	0.018	1.111e-07	0.0005244	0.86106	6.16e-16
rs1490384	6	126851160	0.002466	0.0915516	0.5805	0.001171	0.8797	0.000408162	0.009079	0.3943	6.749e-08	0.00138899	5.98e-14
rs1494678	5	3253177	5.065e-06	0.21511	0.4772	0.1708	0.005313	0.190737	0.005528	0.03772	0.0003999	2.44555e-06	2.17e-09
rs1499894	3	71571696	1.89e-06	0.00418717	0.8519	0.003443	0.1051	0.633193	0.07483	0.6629	0.01763	0.463912	1.71e-10
rs1526480	1	91209986	0.03326	2.45031e-17	0.4276	2.025e-06	5.906e-10	0.0969086	0.2822	2.417e-08	8.834e-07	3.07058e-24	3.24e-14
rs16948048	17	47440466	2.416e-05	1.26536e-11	0.5519	0.007296	0.001035	0.789681	0.8819	0.03772	0.2113	4.46266e-10	1.96e-09
rs16963728	16	61674103	5.81e-05	0.00172971	0.3693	0.4427	0.05654	3.68808e-05	0.1771	0.09295	0.01996	0.000232448	1.97e-10
rs17087844	4	67863736	0.1993	1.92406e-07	0.08564	0.5265	0.1536	0.232234	0.0009608	0.00109	1.318e-06	0.472949	2.11e-10
rs17314804	4	140946828	0.0002424	7.61389e-10	0.1205	0.4835	0.0212	0.0338973	0.6972	0.194	2.711e-05	1.87221e-07	1.01e-11
rs17344426	2	104473036	0.01006	4.20467e-05	0.7016	0.05169	0.00153	0.0250035	0.06881	0.3544	1.143e-06	1.1662e-05	1.84e-23
rs17348586	4	129805156	0.06114	7.55764e-06	0.03717	0.8946	0.5366	0.290372	0.7191	9.392e-10	0.5613	0.00634823	3.97e-09
rs17381664	1	78048331	0.2436	7.87209e-07	0.9585	0.0001071	0.6005	0.519208	0.3856	0.008799	0.006737	0.081817	2.79e-09
rs17411548	18	50822943	4.102e-05	8.66754e-08	0.225	0.003391	6.246e-05	0.712611	0.1571	0.02115	0.01544	3.67085e-11	5.58e-10
rs17448879	3	85521125	0.857	1.23431e-08	0.3907	0.001695	8.292e-05	0.0491239	6.764e-12	0.2744	0.4585	8.24515e-15	3.66e-08
rs17473118	3	43443534	4.055e-07	8.02927e-05	0.7876	0.4921	0.001647	0.512028	0.004714	5.337e-07	0.03519	3.16086e-10	1.32e-09
rs17522122	14	33302882	5.929e-06	2.05005e-06	0.02958	0.6947	0.0006529	0.448247	0.0001452	0.0001609	0.6315	1.1939e-08	1.61e-09
rs17609347	16	72532362	0.04225	1.20366e-07	0.9075	0.1123	6.488e-07	0.828536	0.0009602	8.826e-06	0.472	2.2613e-11	1.43e-09
rs176641	15	89890182	0.002655	0.00315369	0.07887	0.0004653	0.9697	0.00553761	0.004611	0.0007717	0.0004222	0.322586	2.55e-08
rs17762954	17	43899786	0.04458	0.692334	0.1629	1.72e-07	0.2076	0.285586	0.2779	1.253e-13	0.1354	0.000116963	6.15e-12
rs1799971	6	154360797	0.08676	0.233963	0.7471	3.123e-06	0.1594	7.68463e-13	0.1916	0.1739	3.44e-05	7.38617e-08	3.85e-19
rs1833597	5	170342120	0.07068	2.07016e-07	0.5438	0.0277	2.648e-05	0.0659633	0.3837	0.0128	4.832e-10	2.55264e-11	2.51e-14
rs1837470	2	174048371	3.692e-05	1.37779e-11	0.5324	0.005713	0.005777	0.387197	0.1269	6.766e-05	5.023e-07	7.96503e-16	1.98e-21
rs1847370	4	100435826	0.03738	0.0195338	0.5177	1.129e-16	0.005946	0.537072	0.6098	0.07564	0.7139	0.0225046	2.56e-08
rs1858173	12	102627611	0.0007342	1.85328e-06	0.4104	0.07583	0.0007897	0.63516	0.01827	2.68e-08	0.03194	6.19341e-12	1.74e-08
rs1867887	8	27120575	0.6322	0.333115	0.6747	0.4357	0.5989	0.0258944	0.4593	0.001873	2.219e-08	0.422885	1.86e-08
rs194651	1	33418984	0.2182	3.37941e-07	0.8661	0.09816	0.2221	0.872648	0.0009503	0.005941	8.166e-09	2.48541e-09	1.42e-18
rs1954554	14	98725983	4.292e-09	4.24604e-06	0.35	0.8947	0.0007108	0.0451878	0.001543	4.701e-09	0.3306	3.06412e-10	4.47e-10
rs1956002	14	33410749	2.229e-06	0.829146	0.9403	0.1368	0.4334	0.495123	3.158e-07	0.005622	0.005536	4.2769e-05	4.13e-08
rs1993193	18	53156707	0.6526	0.0129914	0.3449	0.008787	0.0009216	0.861137	0.00231	3.39e-15	0.4386	1.41205e-10	6.11e-09
rs1998695	13	55617512	0.5408	0.00284251	0.6334	2.814e-05	0.001001	0.0732113	0.02867	0.2343	1.113e-05	0.0227183	3.16e-08
rs200531	16	24756172	0.007308	1.22455e-05	0.88	0.6014	0.2806	0.113644	0.01327	0.2142	1.741e-05	0.00476461	2.05e-08
rs2014149	2	14539477	0.5446	1.53194e-08	0.4211	0.004131	0.663	0.923122	0.1634	0.0004626	0.08125	0.0854088	1.89e-12
rs2036527	15	78851615	0.4186	0.0112535	0.5149	0.09278	1.208e-06	0.00197069	0.0009645	0.00477	4.265e-13	0.000502874	1.75e-09
rs2044725	3	85645873	2.679e-05	1.65653e-18	0.2804	9.516e-07	1.35e-09	0.00229003	6.88e-28	5.212e-13	0.1791	1.34574e-42	3.11e-08
rs2077750	6	35089811	0.1551	2.22838e-09	0.4502	0.0118	0.5749	0.134245	0.1325	0.0009144	0.01272	0.00408531	6.05e-16
rs2090409	9	108967088	0.1906	8.08178e-13	0.9368	0.7806	0.07577	0.0913691	0.9518	0.01489	0.4131	0.000455024	3.37e-11
rs2094889	9	23382382	0.9325	0.000143732	0.6418	0.5505	0.09544	0.829228	0.171	2.701e-07	0.308	0.546866	9.05e-09
rs2183623	14	98551256	1.168e-06	5.51622e-13	0.4622	0.3696	0.000166	0.519314	3.58e-07	5.385e-17	0.0365	7.74978e-21	1.96e-08
rs2188151	3	50201924	4.495e-07	1.73051e-19	0.5395	0.8331	6.502e-05	0.586116	0.006073	0.0006285	3.035e-06	6.75017e-16	1.35e-09
rs2211588	14	28392538	0.4275	0.127338	0.9422	0.02684	0.9176	0.390603	3.369e-05	1.686e-07	0.2795	0.016306	2.66e-08
rs2217608	7	3700352	0.0009927	1.33585e-05	0.5005	0.7155	0.01156	0.291015	0.3423	1.556e-05	0.0001309	7.96897e-08	3.62e-09
rs2223221	1	166860471	0.01186	0.0724382	0.4461	0.04517	0.0001776	0.401759	1.716e-05	0.003809	0.066	0.316341	7.04e-12
rs2241470	4	10084570	0.4251	0.0921097	0.386	0.03206	0.7562	0.00376357	0.5722	0.007848	3.383e-06	0.164434	1.47e-08
rs2243792	10	8826990	7.051e-08	0.000116988	0.977	0.08511	0.027	0.635311	1.309e-05	2.61e-05	0.08587	2.08041e-12	4.55e-11
rs2279574	12	89745477	9.41e-09	3.21857e-06	0.9419	0.3165	0.07689	0.368821	0.794	0.03875	0.02	1.51034e-06	2.2e-08
rs228619	4	103569283	2.477e-06	5.1937e-05	0.1447	0.8483	0.3711	0.041719	0.2182	0.6629	0.05222	9.95227e-05	1.45e-12
rs2292239	12	56482180	6.269e-06	1.43119e-10	0.2017	0.7355	0.202	0.804006	0.911	0.1234	3.16e-05	5.48253e-07	4.52e-11
rs2298753	4	100257907	0.4849	0.94594	0.264	1.329e-39	0.7133	0.404511	0.5818	0.1234	0.07478	2.12755e-12	1.07e-18
rs2336894	5	166990595	4.231e-05	1.24408e-08	0.914	0.002985	0.4672	0.316714	0.005345	5.007e-06	2.63e-12	3.59182e-17	1.74e-08
rs240995	6	111676513	0.01022	3.01545e-05	0.1275	0.2404	0.006492	0.453577	0.1104	5.042e-05	5.627e-07	1.06904e-09	2.14e-09
rs2471687	4	28593978	0.6609	5.42577e-11	0.5544	0.3323	0.1689	0.847789	0.009347	0.003702	6.436e-10	3.81707e-10	4.35e-11
rs2612033	3	53766026	0.000137	1.6347e-15	0.4174	0.2269	0.09155	0.228322	0.02289	0.0004515	0.1628	2.2564e-08	3.36e-08
rs2710646	2	63134879	0.06151	8.49647e-12	0.3096	0.7726	0.0005393	0.65265	0.05048	4.767e-06	0.009059	2.89018e-09	3.01e-08
rs273504	19	18215247	0.7479	0.000484714	0.9629	0.3071	0.7395	0.669437	0.1945	8.616e-09	0.3069	0.673042	1.15e-09
rs2741339	8	27334969	0.2876	0.11577	0.9783	0.02447	0.9846	0.330291	0.4774	0.194	5.434e-19	0.0155113	2.72e-18
rs279846	4	46329886	0.3694	0.000232107	0.1434	0.7748	0.559	0.382504	4.082e-08	1.686e-07	0.6024	2.1476e-06	2.73e-08
rs2824981	21	20034898	0.0005353	5.54722e-06	0.3324	0.7195	0.4194	0.038935	0.3654	0.4242	0.00123	0.000145959	1.12e-16
rs2841327	9	128156503	0.0001312	1.10057e-05	0.02452	0.00549	0.0003842	0.254851	0.1001	0.0004071	3.851e-06	1.80546e-09	9.93e-09
rs2933192	14	47386441	0.01908	2.53078e-11	0.9772	0.6949	0.4802	0.916707	0.0008193	0.0011	0.2537	1.17808e-08	1.62e-11
rs2936830	12	120167155	0.5721	0.924679	0.2901	0.1787	0.4827	0.0952826	0.0004513	9.958e-09	1.066e-05	0.25925	3.81e-08
rs2966580	3	107957436	0.158	2.34764e-11	0.2151	0.9985	0.4909	1.53787e-05	0.005522	1.908e-05	0.3123	4.19704e-09	1.33e-08
rs2966765	5	109381583	0.04272	8.80367e-05	0.2205	0.8467	0.08451	0.489303	2.075e-06	0.1537	0.08958	0.787661	3.21e-09
rs324886	5	87896602	1.782e-13	1.51045e-16	0.01521	0.01944	0.001622	0.692203	0.3067	6.588e-10	0.9585	8.77459e-08	9.08e-10
rs359255	2	60484507	0.004272	2.66832e-13	0.05502	0.03811	0.02425	0.65722	1.158e-06	1.116e-08	7.943e-06	1.17803e-19	6.29e-12
rs359574	9	127944978	0.001765	2.90564e-08	0.07671	2.593e-09	2.754e-10	7.82172e-07	0.1922	3.709e-07	1.274e-10	4.17034e-26	5.53e-09
rs3737984	1	53708850	0.6953	0.160138	0.6619	0.002844	0.001134	3.90396e-07	0.03332	7.762e-13	0.2526	6.24622e-09	1.86e-21
rs3774800	3	49334768	6.972e-06	0.000111527	0.1992	1.556e-08	1.718e-12	0.00767334	0.03897	0.0001269	1.127e-09	6.06955e-23	2.45e-09
rs3783384	14	103351830	4.309e-06	1.64729e-10	0.9371	0.01395	0.09268	0.0185013	0.03704	0.02427	0.08914	4.90112e-12	4.03e-09
rs3806033	6	70828336	1.716e-06	5.33655e-05	0.09275	0.4518	0.9477	0.0101082	0.1995	0.08175	0.07712	0.172207	1.06e-08
rs3808095	7	127364960	0.0223	0.957293	0.04303	0.1979	0.00387	0.631118	2.032e-06	6.861e-11	0.5377	1.59581e-07	3.18e-08
rs3892308	1	204947007	0.1465	0.000361007	0.4938	0.3705	0.004675	0.403244	1.447e-06	7.136e-09	0.7887	2.34244e-09	3.61e-08
rs400432	3	18623278	0.5445	0.00548174	0.8763	1.088e-05	0.8507	0.00319002	5.072e-07	0.184	1.205e-05	0.0110223	7.7e-14
rs4304152	6	33723290	5.271e-05	4.89442e-05	0.05666	0.005647	0.1778	0.699019	0.001281	0.08379	0.023	0.00055439	9.82e-14
rs4380263	2	104107978	1.056e-05	2.69567e-16	0.5437	1.67e-05	0.005088	0.0802296	0.009062	2.843e-05	1.48e-11	1.43428e-24	1.29e-08
rs4416248	2	22455521	4.417e-07	8.90532e-07	0.08689	0.05533	9.423e-05	0.381622	7.586e-06	2.335e-10	0.01629	2.65564e-17	5.66e-10
rs4518438	5	88157552	1.158e-09	3.3378e-10	0.3642	0.3505	0.1066	0.0915704	0.2662	0.02219	0.7198	3.31075e-06	1.95e-09
rs4523481	1	73899639	0.0008655	0.000871362	0.4188	2.327e-08	4.348e-07	0.00148489	0.003553	0.9306	6.895e-20	1.90385e-19	2.61e-08
rs4528662	18	22740958	7.249e-08	0.00479255	0.4628	0.4535	0.3076	0.101997	0.8529	0.891	0.0002234	0.00430523	1.06e-08
rs4582646	9	15935502	0.007575	0.429223	0.3309	0.2993	0.4928	0.192234	2.407e-05	0.194	1.948e-06	0.000236322	4.29e-08
rs4655941	1	87720853	0.0002362	0.000173462	0.1186	0.1978	0.3524	0.738963	0.06137	0.3943	1.587e-06	1.10458e-06	2.8e-11
rs4687959	3	118623414	0.118	7.05283e-08	0.3345	0.2161	0.2344	0.0169738	0.0652	0.0006726	0.03234	2.92596e-05	4.77e-09
rs4687991	3	117465231	2.466e-05	8.04464e-08	0.7544	0.4637	0.8063	0.381411	0.3402	0.0004737	0.2581	7.97301e-05	3.86e-08
rs4740559	9	14130239	0.06071	4.63194e-07	0.05161	0.02321	0.9607	0.0245242	0.4209	0.9505	0.0007039	0.000524249	1.08e-35
rs4868792	5	166759856	0.01191	0.0189946	0.02139	0.8119	0.765	0.148947	0.073	0.4541	6.124e-09	0.000235615	5.2e-15
rs487609	11	95588102	0.9573	1.23521e-05	0.689	0.0002402	0.002033	0.0017268	0.1489	0.0006064	4.678e-10	2.20766e-05	1.96e-08
rs4884	19	45810035	5.858e-07	0.0196833	0.3995	0.7345	0.8561	0.19966	0.7374	0.01175	0.001833	0.00702236	4.41e-16
rs4954818	2	140809034	0.1042	7.07068e-08	0.7081	0.2339	0.3632	0.00583667	0.0202	0.0002284	0.4377	9.41e-05	7.5e-10
rs4958244	5	133845380	0.0413	0.00902149	0.2202	0.01755	0.0005661	0.254098	0.2148	0.03772	1.449e-09	0.000290322	3.69e-08
rs579119	2	44893134	0.009907	5.04328e-16	0.971	0.3923	0.00245	0.449027	1.825e-05	3.563e-06	0.4792	3.13324e-11	5.78e-10
rs587978	11	105801770	0.8283	3.05511e-07	0.2266	0.3201	0.01486	0.967841	0.02604	6.444e-06	0.002051	4.59868e-06	4.67e-09
rs60271	5	104078233	2.571e-11	4.04122e-05	0.232	0.6709	0.2189	0.982659	0.7134	1.833e-11	0.009049	3.00953e-06	7.06e-09
rs6430849	2	140389889	9.454e-06	0.0022981	0.2139	0.6464	0.08604	0.199457	8.047e-06	0.0006946	0.04234	4.51811e-09	6.44e-11
rs6432817	2	166159099	0.000458	1.8654e-07	0.2794	0.3218	0.1598	0.0492846	0.4801	0.0439	9.35e-06	6.31094e-08	4.98e-10
rs6446159	3	60877992	0.1096	2.52147e-08	0.5241	0.003884	0.1386	0.0171658	0.9758	0.03978	0.0006899	0.772162	3.02e-08
rs6499518	16	71442147	0.03755	6.52334e-10	0.2071	0.05621	0.02955	0.825545	8.093e-07	2.654e-09	0.2355	2.36476e-15	4.3e-10
rs6508344	18	22646735	0.0007305	2.55155e-08	0.1003	0.01688	0.0537	0.596892	0.2844	0.7423	0.002945	0.00356284	6.45e-16
rs6548237	2	621461	4.478e-06	3.08689e-08	0.0742	0.03195	0.9418	0.850376	0.005308	0.2142	0.001043	1.57383e-10	7.03e-13
rs6589386	11	113443753	0.0001542	0.138069	0.04933	8.569e-20	1.096e-06	0.00146031	0.5744	0.7224	3.89e-09	2.14253e-18	4.74e-08
rs6591203	11	65806229	0.03054	0.00701755	0.02249	0.0004397	0.1084	0.0187613	0.2502	0.891	0.001518	0.738455	1.38e-08
rs6601299	8	9184691	0.9257	5.36233e-05	0.1559	1.074e-05	0.9905	0.39674	0.1162	0.05519	0.01111	0.276687	1.43e-13
rs6669447	1	29149361	0.107	0.0122473	0.09952	0.02729	2.155e-06	0.0121578	0.6359	0.9802	7.225e-08	6.19977e-06	6.15e-28
rs6673745	1	101275018	0.004756	8.38447e-05	0.3098	0.3941	0.8513	0.689594	0.0213	0.07768	9.853e-06	0.00274869	3.64e-08
rs6719001	2	203777903	1.994e-06	0.000890688	0.7915	0.2039	0.486	0.518158	3.562e-05	0.001221	0.0001585	8.54519e-10	2e-10
rs6722661	2	100806588	0.1367	2.60758e-10	0.1754	0.1732	0.4109	0.513171	0.413	0.5735	0.002588	6.67853e-06	5.32e-11
rs6777507	3	132634780	0.03835	0.509651	0.05666	0.03051	0.01292	0.0584893	5.226e-05	0.1133	0.0006157	0.173948	2.42e-09
rs6793739	3	126928464	0.2184	0.00369167	0.03841	3.021e-06	0.3024	0.00770752	0.008329	0.00133	0.01608	0.00333131	1.27e-12
rs6796899	3	25228212	0.003471	0.000390149	0.3673	0.5785	0.003618	0.225076	0.0004407	0.001438	0.2704	0.000227228	1.67e-12
rs6923811	6	27289776	0.07775	0.349264	0.4462	0.1856	0.1288	0.133778	8.235e-10	1.357e-08	0.2421	1.99501e-07	9.32e-09
rs6927072	6	152257687	0.04669	9.3769e-24	0.9909	0.02543	0.0004812	0.000917723	0.04118	0.001221	0.08933	1.11425e-16	2.65e-08
rs6930924	6	50790633	1.073e-05	2.74175e-12	0.7	0.3332	0.5663	0.411573	0.04585	9.168e-05	0.395	1.89645e-07	9.61e-14
rs698270	3	136109512	1.623e-05	9.69504e-06	0.3985	0.4818	0.5727	0.994249	0.0001386	0.9604	0.001663	1.72831e-07	1.39e-08
rs7007784	8	73896742	0.01432	7.79828e-08	0.1792	0.1816	0.2648	0.142727	0.001058	0.008905	0.05337	9.21674e-05	2.8e-14
rs7126178	11	29016502	0.03601	1.92159e-05	0.6833	0.7218	0.0002426	0.456777	6.465e-08	0.2944	0.003377	7.63899e-08	1.08e-12
rs7157779	14	79523897	0.2721	4.87996e-06	0.1158	0.02883	0.6705	0.0257441	0.1277	0.474	2.659e-07	0.00285656	7.32e-10
rs7162974	15	66054806	0.04159	3.00001e-05	0.05248	0.01637	0.9665	0.564833	0.1081	0.194	0.09173	0.204748	4.75e-12
rs7250367	19	32984884	0.9938	9.43807e-08	0.07341	0.9139	0.6472	0.190366	0.007374	0.5834	0.0002878	0.0724737	7.07e-14
rs733628	2	60702766	0.03398	2.09652e-08	0.0006098	0.1526	0.9398	0.459601	0.4911	0.5437	0.01451	0.00528574	9.33e-09
rs739447	9	136477511	0.3296	0.292311	0.997	0.09267	0.02298	0.0112512	0.1957	0.0128	2.374e-18	0.109895	3.28e-11
rs7528604	1	66407352	0.001668	3.34547e-09	0.3517	8.899e-10	1.673e-07	0.0802505	0.2587	0.0002509	1.164e-09	5.01692e-22	1.28e-10
rs7586454	2	185574627	0.06497	3.94413e-06	0.6992	0.001225	0.2248	0.627452	0.411	2.143e-05	0.4551	0.112897	1.24e-18
rs7618920	3	74919155	0.1833	1.77244e-09	0.5793	0.8914	0.2889	0.0488412	0.3251	0.0002172	0.07812	0.000573882	1.41e-13
rs7640120	3	70838728	0.5414	0.000189444	0.1991	0.1247	6.923e-08	0.813697	0.0898	1.155e-05	0.0003644	4.966e-09	1.53e-13
rs766047	9	102115224	0.1855	0.012091	0.147	0.03087	0.001485	0.762083	0.368	1.559e-07	0.3525	0.0425372	1.67e-08
rs7797800	7	132596258	0.4087	0.389803	0.7046	0.1043	0.006167	0.522919	0.1732	2.843e-05	1.827e-05	0.0272666	7.71e-09
rs7803385	7	11501136	3.921e-06	0.112403	0.9864	0.4682	0.0592	0.834836	0.003883	0.1335	0.0401	0.0536317	2.79e-08
rs7814393	8	65438121	0.03663	0.000836058	0.8097	0.9527	0.3595	0.318087	2.814e-06	3.619e-10	0.0019	3.30894e-06	3.36e-08
rs7953911	12	49948500	3.544e-05	0.00455821	0.265	0.2525	0.3237	0.235821	0.2885	0.5834	1.489e-06	5.44941e-05	2.32e-09
rs7997881	13	53880788	0.004926	3.73282e-05	0.09336	0.3003	0.1403	0.18339	0.003443	1.674e-05	0.6918	1.00462e-05	5.16e-09
rs804384	20	21436792	1.353e-09	0.108505	0.4408	0.6214	0.01024	0.100119	0.1394	0.008588	0.04133	0.00963242	2.27e-08
rs845734	5	109023410	0.08273	0.281213	0.9457	0.8012	0.03993	0.0129697	0.1024	5.711e-07	1.731e-05	0.676357	2.25e-13
rs869358	20	25374674	0.8297	0.00018341	0.007677	0.9681	0.004673	0.249568	0.5481	0.474	2.892e-07	0.000342549	3.48e-11
rs873308	1	25758655	0.0008438	0.0161475	0.7472	0.06091	0.5462	0.250933	0.887	0.9901	7.626e-07	0.168378	1.28e-08
rs8756	12	66359752	0.01026	0.00301358	0.7878	0.1281	0.0001818	0.686618	0.0004072	0.8513	0.0002155	0.0163128	2.97e-09
rs879255	10	118648043	0.001035	4.65149e-07	0.8823	0.00467	4.264e-06	0.479232	0.03141	0.0009254	0.002027	2.46678e-12	2.86e-11
rs896249	2	100089212	8.302e-06	0.00333015	0.892	0.06913	0.4754	0.0278083	0.6767	0.9703	0.002483	0.0913	3.21e-08
rs9295589	6	23445330	0.01761	3.05188e-09	0.02644	0.9118	0.004545	0.424366	0.7801	0.1335	0.01584	7.28085e-05	5.03e-10
rs9295740	6	27689502	0.6606	0.054721	0.7222	0.06468	0.0004265	0.00643986	4.954e-08	3.325e-11	0.004141	9.92701e-13	1.69e-09
rs9411334	9	134896887	8.284e-05	9.43828e-10	0.6657	0.0004264	0.3805	0.824306	0.6457	0.1436	3.235e-06	2.86675e-11	1.81e-11
rs9482094	6	98364895	0.3528	0.0019133	0.1647	0.7401	0.01087	0.941817	0.0009672	2.321e-07	0.09793	0.436523	1.68e-09
rs9569236	13	55794437	0.3799	8.4176e-08	0.8802	3.336e-05	2.319e-06	0.308296	0.09604	1.674e-05	5.77e-10	1.57457e-16	4.74e-09
rs9572914	13	31839274	0.8892	0.00249814	0.2756	0.6165	0.1815	4.19744e-06	0.001109	0.007531	0.0988	0.560706	1.38e-11
rs9647333	3	127158581	0.0002715	0.192802	0.8551	0.5299	0.2039	0.124165	0.003125	2.943e-08	8.946e-05	0.105294	6.03e-10
rs966971	2	60138262	0.001014	2.6057e-19	0.3601	0.05363	0.005091	0.384903	5.115e-08	2.242e-09	2.474e-05	7.41661e-24	7.68e-25
rs968525	19	19459215	2.421e-05	0.00199704	0.491	0.005518	0.008118	0.000761533	0.6986	0.8216	1.994e-05	5.71772e-07	8.45e-12
rs975303	6	19028788	0.2299	0.00233551	0.04857	5.231e-06	0.001169	1.92657e-05	0.001512	0.474	0.5478	0.00296829	6.45e-12
rs9771228	7	32322496	0.001153	4.54046e-08	0.2482	0.513	0.006165	0.374225	0.02649	0.00445	2.651e-06	2.7169e-08	2.43e-15
rs9816528	3	44080218	0.0002209	0.00304922	0.02823	0.3938	0.6386	0.0351152	0.0001521	0.5834	0.1275	0.571337	1.48e-08
rs9852406	3	135625498	0.0001843	8.18488e-07	0.4596	0.5766	0.4161	0.885719	0.9803	0.03462	0.08276	0.00293893	1.38e-08
rs9919557	11	112877408	3.201e-05	9.82604e-13	0.8386	1.304e-10	9.416e-09	1.59028e-07	0.09371	1.036e-10	1.627e-11	5.26954e-33	3.71e-08
rs9928448	16	30072530	0.5266	0.00200322	0.4193	1.786e-11	0.03215	0.00019707	0.03994	0.04184	0.01271	0.0126979	5.8e-09
rs9944807	18	44788908	0.1467	1.92598e-10	0.06721	0.7912	0.9473	0.316225	0.0001708	0.0439	0.119	3.54822e-07	1.77e-08
Note: The red highlighted cell shows the trait with the strongest association with the SNP.

## Sheet: ST3
Supplementary Table 3. Lead SNPs for the externalizing spectrum.
CHR	SNP	BP	P	TOTAL	NSIG	S05	S01	S001	S0001	SP2
15	rs2132661	47679726	5.28e-32	41	0	0	0	0	41	rs1040148(1),rs9944240(1),rs12909443(1),rs11858146(1),rs1349951(1),rs12443168(1),rs11634896(1),rs2045158(1),rs11070575(1),rs957566(1),rs7170315(1),rs877347(1),rs1107930(1),rs1486898(1),rs1486900(1),rs531595(1),rs1496919(1),rs16959322(1),rs590247(1),rs4774494(1),rs4774495(1),rs7163407(1),rs4624112(1),rs281259(1),rs175979(1),rs281265(1),rs2132660(1),rs8032333(1),rs281286(1),rs8033799(1),rs281287(1)…
6	rs766406	26319588	3.08e-24	109	8	4	0	7	90	rs442601(1),rs199736(1),rs199726(1),rs199739(1),rs129129(1),rs199753(1),rs199752(1),rs199751(1),rs199750(1),rs9358901(1),rs1540276(1),rs2213284(1),rs2230655(1),rs4401650(1),rs1540275(1),rs2032447(1),rs7756117(1),rs807212(1),rs1572982(1),rs12346(1),rs198856(1),rs198854(1),rs198853(1),rs198852(1),rs198848(1),rs198845(1),rs198834(1),rs13161(1),rs198828(1),rs198821(1),rs198820(1),rs198815(1),rs198814…
3	rs1146751	84889597	5.78e-22	74	12	7	4	0	51	rs7653051(1),rs11713152(1),rs2647716(1),rs2647715(1),rs13085795(1),rs13092059(1),rs624008(1),rs1248829(1),rs11707605(1),rs9879484(1),rs10440084(1),rs13060392(1),rs1694924(1),rs6802379(1),rs6787213(1),rs1146747(1),rs1146745(1),rs1146743(1),rs1032506(1),rs1032507(1),rs7625451(1),rs9836407(1),rs7642644(1),rs12495388(1),rs515207(1),rs12494212(1),rs1146740(1),rs9847448(1),rs1248821(1),rs1248820(1),rs7…
18	rs17527878	53404986	9.98e-22	54	3	6	0	5	40	rs3760600(1),rs1377243(1),rs7233312(1),rs17596995(1),rs4572488(1),rs9636107(1),rs2123389(1),rs1452787(1),rs2123392(1),rs12457949(1),rs590076(1),rs17514172(1),rs682245(1),rs12455205(1),rs9951280(1),rs10871582(1),rs616580(1),rs644279(1),rs12457157(1),rs12458015(1),rs1421024(1),rs9946669(1),rs663118(1),rs11151206(1),rs1031831(1),rs11151224(1),rs784216(1),rs12458596(1),rs12326693(1),rs12326688(1),rs1…
11	rs4444109	112854309	1.08e-21	41	1	0	4	9	27	rs11214440(1),rs10789932(1),rs17583142(1),rs11214444(1),rs1892979(1),rs11214447(1),rs11214457(1),rs17114682(1),rs11214459(1),rs11214463(1),rs7941072(1),rs12574688(1),rs10891496(1),rs10891497(1),rs10891498(1),rs2509377(1),rs2853191(1),rs1436107(1),rs1245090(1),rs1245115(1),rs7951034(1),rs1245111(1),rs1245110(1),rs1245109(1),rs1245108(1),rs12789616(1),rs1245106(1),rs1436110(1),rs1245104(1),rs181653…
6	rs13195040	27413924	6.39e-21	521	0	3	18	27	473	rs303011(1),rs303010(1),rs303005(1),rs9461103(1),rs10498722(1),rs6940230(1),rs2744301(1),rs927984(1),rs9295661(1),rs13212936(1),rs13191296(1),rs16890970(1),rs9467583(1),rs17320614(1),rs4236039(1),rs7775820(1),rs4343909(1),rs9467590(1),rs6906814(1),rs7776065(1),rs9986459(1),rs9885831(1),rs4236040(1),rs4712969(1),rs6902211(1),rs1892250(1),rs4712972(1),rs6456701(1),rs1954598(1),rs6910549(1),rs189225…
2	rs359249	60480237	2.93e-20	19	2	4	4	2	7	rs4671368(1),rs10178652(1),rs17032721(1),rs882924(1),rs11691553(1),rs972337(1),rs17329195(1),rs7588487(1),rs17039713(1),rs6761814(1),rs6545777(1),rs17329726(1),rs907575(1)
9	rs656322	127834277	5.37e-20	42	0	2	0	1	39	rs876663(1),rs623096(1),rs687434(1),rs10819012(1),rs10819014(1),rs10986490(1),rs360198(1),rs7857571(1),rs3824507(1),rs360208(1),rs643228(1),rs2810467(1),rs589748(1),rs10760392(1),rs10986565(1),rs10819030(1),rs7856303(1),rs10819033(1),rs6478696(1),rs7860360(1),rs6478697(1),rs7867094(1),rs10986578(1),rs7021901(1),rs972301(1),rs4838247(1),rs2113352(1),rs6744(1),rs1549314(1),rs1048251(1),rs1517411(1)…
3	rs7644873	85720888	1.72e-19	26	12	0	0	0	14	rs4513466(1),rs4553985(1),rs6549051(1),rs6800957(1),rs17334678(1),rs9827598(1),rs1448601(1),rs1448600(1),rs1037231(1),rs9846229(1),rs7648093(1),rs7620948(1),rs17023255(1),rs13089170(1)
3	rs6442644	16852853	1.86e-19	75	0	0	2	1	72	rs9310502(1),rs17042606(1),rs10510460(1),rs13066132(1),rs7634863(1),rs7617386(1),rs11711008(1),rs9818121(1),rs12487656(1),rs4684295(1),rs13322151(1),rs6778810(1),rs4128498(1),rs12107299(1),rs9829793(1),rs13073517(1),rs17272677(1),rs4684303(1),rs9858071(1),rs895941(1),rs9868600(1),rs6442643(1),rs9854865(1),rs4685393(1),rs7625399(1),rs748832(1),rs6800583(1),rs7625233(1),rs2122256(1),rs1823369(1),rs…
1	rs2228693	66509014	1.88e-19	75	7	0	3	1	64	rs10789204(1),rs4077431(1),rs4133072(1),rs6681523(1),rs6684621(1),rs12081185(1),rs6588169(1),rs1316871(1),rs12760605(1),rs7547294(1),rs4503327(1),rs7550837(1),rs12088813(1),rs7527901(1),rs7531270(1),rs6680334(1),rs12729364(1),rs10889590(1),rs1937458(1),rs1937456(1),rs17417915(1),rs7551853(1),rs10789205(1),rs12760902(1),rs12743648(1),rs12062815(1),rs12062901(1),rs6691929(1),rs2503207(1),rs1937439(…
16	rs1421085	53800954	2.36e-19	42	0	0	0	2	40	rs1861868(1),rs7184874(1),rs9937053(1),rs9928094(1),rs12446228(1),rs9939973(1),rs9940128(1),rs9923147(1),rs9923544(1),rs8055197(1),rs1861866(1),rs10852521(1),rs11075985(1),rs2058908(1),rs17817288(1),rs1477196(1),rs1121980(1),rs7193144(1),rs8057044(1),rs17817449(1),rs11075987(1),rs8050136(1),rs8051591(1),rs9935401(1),rs3751812(1),rs3751813(1),rs9936385(1),rs11075989(1),rs11075990(1),rs7202116(1),r…
14	rs11628909	58819226	2.79e-19	4	0	1	0	0	3	rs1051858(1),rs2348075(1),rs8005231(1)
10	rs12359870	134085559	4.32e-19	16	0	0	0	0	16	rs12764265(1),rs2814192(1),rs11146268(1),rs2818399(1),rs11146271(1),rs11146272(1),rs4242718(1),rs4633376(1),rs11146274(1),rs11146275(1),rs7901796(1),rs11146278(1),rs12769606(1),rs4880363(1),rs11146281(1),rs7075670(1)
7	rs2140619	114007270	9.78e-19	18	0	9	4	0	5	rs1194324(1),rs1799250(1),rs1194329(1),rs940468(1),rs2694943(1),rs2694944(1),rs10953756(1),rs1916985(1),rs17372022(1)
18	rs8085454	53489366	1.08e-18	13	0	0	4	4	5	rs7244531(1),rs937831(1),rs7233004(1),rs9945732(1),rs2902193(1),rs7241090(1),rs7232435(1),rs1364414(1),rs1345920(1),rs12605042(1),rs8095403(1),rs2113446(1),rs2113447(1)
2	rs11681451	225334104	1.11e-18	30	4	0	1	1	24	rs2042086(1),rs16865859(1),rs16865861(1),rs16865863(1),rs918289(1),rs2075346(1),rs759725(1),rs759722(1),rs7575253(1),rs7575615(1),rs3738954(1),rs3738953(1),rs7604287(1),rs7564006(1),rs7564016(1),rs4674891(1),rs7600162(1),rs1642922(1),rs1523921(1),rs12611811(1),rs11686590(1),rs17479770(1),rs10498162(1),rs10498164(1),rs16866096(1),rs10498174(1)
3	rs4858800	48755820	2.15e-18	81	18	38	1	13	11	rs4858819(1),rs730566(1),rs4858828(1),rs4858798(1),rs12493578(1),rs4858830(1),rs4858831(1),rs12497850(1),rs9882443(1),rs1352420(1),rs10865953(1),rs7621003(1),rs7631908(1),rs4855842(1),rs4855877(1),rs6784820(1),rs1464568(1),rs885592(1),rs1568661(1),rs3924462(1),rs11130199(1),rs3870338(1),rs11130202(1),rs1050088(1),rs11720264(1)
10	rs12780116	104821946	2.82e-18	150	6	0	1	0	143	rs7086205(1),rs11191381(1),rs1475642(1),rs284860(1),rs11191401(1),rs284858(1),rs284857(1),rs284855(1),rs192569(1),rs619824(1),rs4919683(1),rs4919686(1),rs4919687(1),rs3781287(1),rs10786712(1),rs6163(1),rs6162(1),rs743572(1),rs10883785(1),rs7097872(1),rs7096475(1),rs4290163(1),rs12219246(1),rs4919690(1),rs7096169(1),rs9527(1),rs4917985(1),rs11191424(1),rs7085104(1),rs12416687(1),rs3740392(1),rs107…
2	rs13411140	144215811	3.03e-18	31	4	1	1	1	24	rs7580625(1),rs12998761(1),rs12612084(1),rs16822524(1),rs13011344(1),rs17230746(1),rs11892116(1),rs5025201(1),rs6736101(1),rs4430884(1),rs13004397(1),rs12616939(1),rs12617059(1),rs10048736(1),rs11690735(1),rs12478031(1),rs3795872(1),rs4560048(1),rs12464672(1),rs12996951(1),rs6731065(1),rs13020925(1),rs12615880(1),rs4662336(1),rs6727288(1),rs11887074(1)
17	rs4790981	65921834	3.19e-18	16	0	0	0	2	14	rs12600551(1),rs12603589(1),rs2365468(1),rs4790908(1),rs12451511(1),rs9897982(1),rs3935969(1),rs7208663(1),rs6504549(1),rs6504550(1),rs7216064(1),rs8072225(1),rs12451721(1),rs7213324(1),rs8082280(1),rs3760274(1)
1	rs6692813	80848989	4.54e-18	27	0	0	0	0	27	rs1937799(1),rs12088070(1),rs17488710(1),rs17488724(1),rs17488752(1),rs2389022(1),rs2892661(1),rs17435926(1),rs17488857(1),rs17488871(1),rs17435994(1),rs10493662(1),rs6697039(1),rs6673543(1),rs6688826(1),rs12077931(1),rs12080711(1),rs12118987(1),rs11162975(1),rs12240077(1),rs10158964(1),rs10874124(1),rs1937787(1),rs12070989(1),rs10157705(1),rs6696084(1),rs11162988(1)
16	rs2303220	71988728	1.07e-17	103	0	9	2	5	87	rs367675(1),rs4268752(1),rs3803702(1),rs1424140(1),rs2356414(1),rs6499514(1),rs7191938(1),rs12925320(1),rs8063760(1),rs7500119(1),rs12446461(1),rs732318(1),rs8051212(1),rs9936249(1),rs3813743(1),rs7187354(1),rs9940771(1),rs8044561(1),rs9926110(1),rs2432524(1),rs3829537(1),rs4788809(1),rs4788811(1),rs4788812(1),rs11648240(1),rs4788547(1),rs4788817(1),rs4788821(1),rs979789(1),rs3752681(1),rs8203(1)…
13	rs12865343	55692494	1.2e-17	217	31	8	1	43	134	rs2209405(1),rs17089981(1),rs9536961(1),rs7994312(1),rs7999502(1),rs9563286(1),rs7322089(1),rs7992016(1),rs1570751(1),rs9569206(1),rs7329506(1),rs3120890(1),rs3120855(1),rs4885709(1),rs7327702(1),rs9569215(1),rs2316648(1),rs1582147(1),rs1578052(1),rs1578051(1),rs3120866(1),rs3120868(1),rs2316642(1),rs3120881(1),rs7490613(1),rs9537001(1),rs9591647(1),rs9569231(1),rs4344605(1),rs2316652(1),rs956923…
3	rs1449397	85660387	1.54e-17	50	0	0	0	0	50	rs13099704(1),rs9824840(1),rs1368744(1),rs9824386(1),rs12631345(1),rs11714549(1),rs1465716(1),rs7651113(1),rs12487446(1),rs1433710(1),rs1030720(1),rs12639001(1),rs6781515(1),rs9825345(1),rs892365(1),rs9824071(1),rs1433713(1),rs10865609(1),rs1014796(1),rs4856582(1),rs1449403(1),rs1449409(1),rs17460569(1),rs7623474(1),rs17520968(1),rs12489307(1),rs2325001(1),rs6804549(1),rs4076016(1),rs9833236(1),r…
7	rs2718167	135093445	5.54e-17	23	12	2	1	0	8	rs4732121(1),rs11772832(1),rs3812281(1),rs2551778(1),rs2551777(1),rs2551774(1),rs2551773(1),rs2551767(1),rs2696884(1)
13	rs12873833	59351639	1.06e-16	80	1	3	2	5	69	rs9569960(1),rs12428889(1),rs12877345(1),rs12876461(1),rs12863964(1),rs1548329(1),rs12866351(1),rs12867049(1),rs2321886(1),rs2321885(1),rs2321884(1),rs17608913(1),rs17055603(1),rs4432147(1),rs1856807(1),rs1340550(1),rs1340552(1),rs9597880(1),rs1934746(1),rs9591937(1),rs1538860(1),rs1538861(1),rs9597882(1),rs17055640(1),rs12431267(1),rs9597884(1),rs4243012(1),rs1340556(1),rs1340557(1),rs9317021(1)…
11	rs7124442	27677041	1.06e-16	40	12	1	2	0	25	rs1871249(1),rs6484311(1),rs10835190(1),rs1038659(1),rs1038660(1),rs6484314(1),rs10767646(1),rs12577586(1),rs10835201(1),rs1488830(1),rs879048(1),rs4074134(1),rs4923460(1),rs4923461(1),rs925946(1),rs17309874(1),rs925947(1),rs10501087(1),rs11030104(1),rs11030107(1),rs7103411(1),rs10835211(1),rs16917237(1),rs12273363(1),rs12288512(1),rs11030123(1),rs17309930(1)
4	rs13114738	103284865	1.35e-16	18	8	0	0	6	4	rs13119516(1),rs233815(1),rs233809(1),rs233808(1),rs233806(1),rs233805(1),rs233804(1),rs173048(1),rs13129951(1),rs230489(1)
14	rs722637	104261723	2.42e-16	77	4	0	7	1	65	rs12879663(1),rs12896612(1),rs2065018(1),rs2065017(1),rs12885762(1),rs12892062(1),rs12885234(1),rs12894275(1),rs2065015(1),rs7155822(1),rs10459573(1),rs12185021(1),rs4906327(1),rs8012127(1),rs11625172(1),rs3783397(1),rs3783398(1),rs12896919(1),rs7148456(1),rs2296482(1),rs12889403(1),rs7140568(1),rs8017993(1),rs2403197(1),rs10134399(1),rs11850979(1),rs8007915(1),rs3783404(1),rs10135248(1),rs715014…
8	rs4735044	93057478	2.63e-16	3	0	0	0	0	3	rs9297901(1),rs6471322(1),rs2920939(1)
2	rs838039	140342288	2.93e-16	74	29	10	0	0	35	rs12474301(1),rs344870(1),rs344868(1),rs1446391(1),rs10496825(1),rs2033759(1),rs2083153(1),rs7564459(1),rs6743370(1),rs2053268(1),rs2033758(1),rs4954789(1),rs2164855(1),rs6729712(1),rs1837160(1),rs1837162(1),rs12472828(1),rs1438033(1),rs7425498(1),rs10496826(1),rs13384228(1),rs7603667(1),rs11677351(1),rs10200638(1),rs12611682(1),rs12613537(1),rs1401935(1),rs9989822(1),rs10187901(1),rs1520083(1),r…
3	rs827162	158023087	4.71e-16	214	10	39	16	12	137	rs11924438(1),rs17681602(1),rs17681620(1),rs2712319(1),rs3107582(1),rs2712327(1),rs2686543(1),rs1608103(1),rs1608104(1),rs6441171(1),rs6441173(1),rs1608114(1),rs7624303(1),rs12486445(1),rs13072413(1),rs6802443(1),rs1581412(1),rs7645383(1),rs1724729(1),rs1724728(1),rs1724727(1),rs1724725(1),rs2693546(1),rs1915935(1),rs1730032(1),rs827160(1),rs827156(1),rs827155(1),rs862352(1),rs864331(1),rs827153(…
2	rs390480	32510072	1.46e-15	76	5	0	1	1	69	rs160803(1),rs11904162(1),rs2064813(1),rs2366547(1),rs6737500(1),rs12991444(1),rs7577696(1),rs13017189(1),rs17767988(1),rs2280967(1),rs2280968(1),rs10490360(1),rs467523(1),rs6760105(1),rs3769604(1),rs7566162(1),rs7605242(1),rs7581340(1),rs11691939(1),rs4952248(1),rs4952250(1),rs13006495(1),rs4952252(1),rs6717209(1),rs7581432(1),rs7588883(1),rs13427170(1),rs212739(1),rs212746(1),rs212748(1),rs2127…
15	rs1435745	47841705	1.68e-15	86	8	5	9	10	54	rs10467913(1),rs4143629(1),rs16959485(1),rs1496903(1),rs1541729(1),rs1541730(1),rs6493278(1),rs1908794(1),rs8038491(1),rs395722(1),rs406196(1),rs1496899(1),rs12591490(1),rs12050589(1),rs12439443(1),rs12439408(1),rs16959504(1),rs8041003(1),rs281243(1),rs7162110(1),rs7163186(1),rs7176570(1),rs392572(1),rs421853(1),rs13313437(1),rs7175895(1),rs2059473(1),rs11070587(1),rs17527773(1),rs1797225(1),rs20…
13	rs1925115	96958817	1.75e-15	121	5	5	10	16	85	rs11070136(1),rs7319952(1),rs9561931(1),rs9561932(1),rs9561935(1),rs9561936(1),rs9302084(1),rs11616456(1),rs7995306(1),rs6492821(1),rs12583795(1),rs7334552(1),rs7338266(1),rs7981923(1),rs9561964(1),rs11070154(1),rs4773928(1),rs7323150(1),rs9556503(1),rs9556504(1),rs6492824(1),rs12858210(1),rs9561967(1),rs4773930(1),rs9561969(1),rs1877475(1),rs9516620(1),rs7333045(1),rs12876018(1),rs1537030(1),rs7…
7	rs2057884	104930250	2.44e-15	58	2	3	0	4	49	rs2470945(1),rs2428161(1),rs17639764(1),rs6948885(1),rs9655780(1),rs11981882(1),rs10808141(1),rs6963395(1),rs6967587(1),rs2299297(1),rs2385537(1),rs1142(1),rs1143(1),rs1144(1),rs7797912(1),rs2299304(1),rs4730070(1),rs10487150(1),rs10238507(1),rs10266871(1),rs3779210(1),rs2240463(1),rs10281422(1),rs41562(1),rs2237612(1),rs41563(1),rs4730073(1),rs13235033(1),rs10953470(1),rs2299319(1),rs3801282(1),…
1	rs6679116	73348889	2.53e-15	96	40	3	1	2	50	rs12127723(1),rs12736962(1),rs12145482(1),rs11210055(1),rs6700560(1),rs6667201(1),rs6669872(1),rs1405056(1),rs1405052(1),rs1525986(1),rs11210056(1),rs12117265(1),rs10889992(1),rs12117216(1),rs11210071(1),rs11210072(1),rs11210073(1),rs12136862(1),rs12134034(1),rs7544848(1),rs12140851(1),rs12138089(1),rs2422320(1),rs2422321(1),rs2901713(1),rs10889994(1),rs7519251(1),rs6657272(1),rs1917882(1),rs1214…
6	rs1624440	26433329	3.09e-15	179	93	5	2	3	76	rs9467722(1),rs10946817(1),rs9393709(1),rs12199613(1),rs9688946(1),rs9379860(1),rs12214031(1),rs1624064(1),rs1796518(1),rs2076029(1),rs7356988(1),rs4712987(1),rs3799379(1),rs1796520(1),rs742090(1),rs1796521(1),rs4320356(1),rs1741740(1),rs3846845(1),rs2237236(1),rs1977198(1),rs1407045(1),rs6926629(1),rs6903973(1),rs13194984(1),rs1321479(1),rs9467774(1),rs3736781(1),rs3736782(1),rs1056667(1),rs7765…
8	rs17734690	9713196	3.21e-15	548	22	14	57	61	394	rs2945251(1),rs2945249(1),rs2955587(1),rs2948305(1),rs712253(1),rs17594065(1),rs17594093(1),rs13274039(1),rs7011221(1),rs4840913(1),rs17594423(1),rs793506(1),rs7004604(1),rs793728(1),rs793510(1),rs793508(1),rs2030280(1),rs2976856(1),rs2980773(1),rs2921040(1),rs2979189(1),rs2979201(1),rs2979203(1),rs2979207(1),rs2980747(1),rs6986470(1),rs11777086(1),rs11776995(1),rs13251924(1),rs2948586(1),rs29485…
11	rs10736470	113418371	3.61e-15	21	0	0	0	0	21	rs4421776(1),rs4611239(1),rs17602038(1),rs4938022(1),rs10891564(1),rs6589379(1),rs4503578(1),rs7111031(1),rs4938024(1),rs6589381(1),rs7949802(1),rs4479021(1),rs4534613(1),rs12361261(1),rs4466875(1),rs7131411(1),rs4245154(1),rs2511515(1),rs2514224(1),rs12222458(1),rs10736469(1)
14	rs1235	47309496	4.74e-15	92	2	1	0	12	77	rs11157496(1),rs2415969(1),rs4451880(1),rs11627498(1),rs12894694(1),rs12895351(1),rs1815493(1),rs7148294(1),rs7149718(1),rs8017237(1),rs8016278(1),rs2415971(1),rs12100560(1),rs8008753(1),rs8008838(1),rs2899981(1),rs4318124(1),rs11847489(1),rs12185004(1),rs12185003(1),rs11625708(1),rs11625752(1),rs11625716(1),rs12886911(1),rs8011178(1),rs8011612(1),rs8018403(1),rs8017714(1),rs2415973(1),rs2415974(…
4	rs1789891	100250419	6.22e-15	26	4	6	1	0	15	rs2213041(1),rs1789888(1),rs1789892(1),rs1154433(1),rs1229978(1),rs1662060(1),rs1662058(1),rs904096(1),rs1662051(1),rs980972(1),rs1693470(1),rs1662039(1),rs2851300(1),rs1238015(1),rs1229854(1),rs1229851(1)
1	rs10749823	73900843	8.15e-15	13	0	0	1	0	12	rs1697229(1),rs4361946(1),rs4384177(1),rs1501488(1),rs7523027(1),rs10736420(1),rs1121232(1),rs6695200(1),rs7538462(1),rs9661557(1),rs1604346(1),rs17573281(1),rs7367782(1)
2	rs6745270	44842487	9.22e-15	81	1	0	24	8	48	rs1551315(1),rs3738985(1),rs713447(1),rs4952710(1),rs2165421(1),rs2340810(1),rs2005203(1),rs7586188(1),rs1142523(1),rs1056865(1),rs8886(1),rs2241871(1),rs2241870(1),rs2241869(1),rs2053455(1),rs2053454(1),rs4953086(1),rs4953087(1),rs4953088(1),rs4953089(1),rs4953090(1),rs6721675(1),rs2304769(1),rs17580226(1),rs2616444(1),rs1085488(1),rs1067346(1),rs1067345(1),rs1067343(1),rs1067342(1),rs1067341(1)…
16	rs11645478	7344604	1.19e-14	9	1	0	0	1	7	rs4300660(1),rs12924980(1),rs4275868(1),rs10163350(1),rs4350587(1),rs4787008(1),rs7188141(1),rs7193155(1)
2	rs901532	62763347	1.48e-14	12	2	0	0	0	10	rs13388903(1),rs7582882(1),rs4233979(1),rs13396048(1),rs4672527(1),rs11903221(1),rs11125927(1),rs12471388(1),rs6726083(1),rs11904315(1)
5	rs4235481	60093387	1.58e-14	184	4	36	26	9	109	rs27223(1),rs35386(1),rs1562235(1),rs1445852(1),rs11740327(1),rs206789(1),rs2061250(1),rs11959922(1),rs286154(1),rs4307050(1),rs4524466(1),rs2085409(1),rs6887637(1),rs7720233(1),rs7715147(1),rs10043291(1),rs1460958(1),rs1444237(1),rs7726875(1),rs898622(1),rs13155641(1),rs1870681(1),rs1870683(1),rs6872863(1),rs6877849(1),rs10057395(1),rs6449502(1),rs4700392(1),rs4482855(1),rs10077663(1),rs7712473(…
5	rs2115322	50666618	1.6e-14	40	0	1	2	17	20	rs4373244(1),rs2202134(1),rs2173974(1),rs2134250(1),rs2062722(1),rs6880620(1),rs9291725(1),rs4141540(1),rs6884007(1),rs6869844(1),rs6449600(1),rs6449607(1),rs6449613(1),rs6880335(1),rs1035513(1),rs1904445(1),rs6894368(1),rs6896357(1),rs7714549(1),rs9687549(1),rs7717151(1),rs918634(1),rs6861649(1),rs6898765(1),rs11953073(1),rs6875967(1),rs12513518(1),rs767715(1),rs4079124(1),rs10940000(1),rs770836…
4	rs4975311	143500223	1.9e-14	120	6	1	10	2	101	rs17016514(1),rs2008423(1),rs1443190(1),rs7671783(1),rs13102826(1),rs1838085(1),rs1443184(1),rs2120159(1),rs13149611(1),rs331939(1),rs1443183(1),rs331951(1),rs331952(1),rs331953(1),rs331961(1),rs331962(1),rs331964(1),rs331965(1),rs331946(1),rs331945(1),rs331944(1),rs17016768(1),rs7679151(1),rs7668552(1),rs10519666(1),rs1014464(1),rs1992418(1),rs6823627(1),rs1444949(1),rs1441417(1),rs1441418(1),rs…
8	rs12678667	97802582	1.96e-14	42	0	0	15	2	25	rs6981536(1),rs7003624(1),rs7007691(1),rs7007840(1),rs10090649(1),rs7013870(1),rs7018329(1),rs750341(1),rs1836911(1),rs2164548(1),rs2651479(1),rs2319923(1),rs2319924(1),rs4604403(1),rs2319926(1),rs9642937(1),rs2319927(1),rs2319928(1),rs10955084(1),rs10955085(1),rs11779519(1),rs12543202(1),rs7837462(1),rs3843550(1),rs1864383(1),rs4735439(1),rs7827132(1),rs7845171(1),rs1125407(1),rs1864384(1),rs186…
14	rs8003422	103321603	2.35e-14	27	0	2	0	2	23	rs8008676(1),rs7145882(1),rs12888955(1),rs12432777(1),rs12148050(1),rs12436181(1),rs8023164(1),rs8009520(1),rs8006649(1),rs7143963(1),rs4906267(1),rs941589(1),rs1131877(1),rs9324052(1),rs10149939(1),rs12588339(1),rs10148367(1),rs2273393(1),rs4906270(1),rs3783386(1),rs9671376(1),rs4906272(1),rs3818287(1),rs2269325(1),rs872945(1)
17	rs2525570	29681245	2.48e-14	65	5	0	0	0	60	rs2269855(1),rs2952976(1),rs2953012(1),rs2953009(1),rs2953000(1),rs2952999(1),rs2905878(1),rs2952989(1),rs2905803(1),rs2905870(1),rs2905872(1),rs1013946(1),rs2905800(1),rs2285812(1),rs2952995(1),rs984125(1),rs2905795(1),rs2905881(1),rs2285892(1),rs2018624(1),rs2012581(1),rs7216033(1),rs7220483(1),rs11080146(1),rs757384(1),rs10512433(1),rs8080679(1),rs12945157(1),rs4795591(1),rs9892839(1),rs110801…
2	rs11682720	60227958	2.77e-14	23	2	2	1	5	13	rs6740476(1),rs730402(1),rs10190898(1),rs12477433(1),rs2900890(1),rs11683804(1),rs13391899(1),rs4672335(1),rs13424107(1),rs17328748(1),rs1863159(1),rs4671360(1),rs10206105(1),rs6751279(1),rs918963(1),rs4672338(1),rs11693339(1),rs12622148(1),rs1007265(1)
11	rs1897305	127478879	4.4e-14	49	8	0	0	0	41	rs1358557(1),rs1406330(1),rs1919259(1),rs356235(1),rs356234(1),rs356233(1),rs356250(1),rs356249(1),rs356248(1),rs356247(1),rs356262(1),rs11220973(1),rs242261(1),rs4937244(1),rs356261(1),rs356256(1),rs10893721(1),rs356237(1),rs88492(1),rs88493(1),rs356238(1),rs173332(1),rs356240(1),rs356242(1),rs11220998(1),rs7928097(1),rs7932225(1),rs7130843(1),rs1346947(1),rs11221000(1),rs356269(1),rs11221003(1)…
5	rs9292400	30814262	4.49e-14	47	1	0	11	0	35	rs7719867(1),rs6862013(1),rs6883178(1),rs6866234(1),rs16900129(1),rs6872460(1),rs6877365(1),rs11948474(1),rs1436987(1),rs4485945(1),rs2330539(1),rs1392452(1),rs9292397(1),rs6863430(1),rs6864112(1),rs6881190(1),rs9292398(1),rs10472183(1),rs1392449(1),rs2133763(1),rs1532621(1),rs1532620(1),rs11954035(1),rs7704589(1),rs1532619(1),rs1532618(1),rs1500210(1),rs1353960(1),rs1604101(1),rs1604100(1),rs217…
11	rs2513577	113712278	4.49e-14	72	0	0	0	9	63	rs10891573(1),rs7126925(1),rs7123334(1),rs11214677(1),rs17603387(1),rs12281062(1),rs11601692(1),rs11605737(1),rs17531898(1),rs17532157(1),rs17532254(1),rs11602504(1),rs17532375(1),rs17610915(1),rs17532479(1),rs11600717(1),rs11602934(1),rs11601890(1),rs11607594(1),rs11607622(1),rs11607747(1),rs11606746(1),rs1355202(1),rs11605078(1),rs11605119(1),rs11600908(1),rs11606211(1),rs11606336(1),rs11607704…
11	rs2734837	113286829	6.14e-14	55	8	3	7	5	32	rs4987094(1),rs719802(1),rs1055076(1),rs4938010(1),rs4938011(1),rs11214592(1),rs10891541(1),rs11214594(1),rs12360992(1),rs12224538(1),rs4590907(1),rs4938014(1),rs11214598(1),rs7118900(1),rs11604671(1),rs2734849(1),rs11214599(1),rs11214601(1),rs2511520(1),rs10891549(1),rs1554929(1),rs1124491(1),rs1079595(1),rs1079594(1),rs6277(1),rs1076560(1),rs2283265(1),rs2734839(1),rs2734838(1),rs2075654(1),rs2…
1	rs12751825	66324394	6.63e-14	10	0	0	1	3	6	rs10493381(1),rs12741948(1),rs4278348(1),rs7532805(1),rs4655586(1),rs4291477(1),rs7416472(1),rs12035209(1),rs5010905(1),rs12739892(1)
11	rs7937768	121635061	7.06e-14	34	0	0	1	21	12	rs11218381(1),rs2887763(1),rs1944677(1),rs1944692(1),rs1893842(1),rs2156665(1),rs1893845(1),rs1944693(1),rs10790457(1),rs7115308(1),rs7115487(1),rs7941422(1),rs10736511(1),rs10736512(1),rs7945301(1),rs7932213(1),rs17125802(1),rs11218394(1),rs10736513(1),rs4936647(1),rs4936648(1),rs7106615(1),rs1944689(1),rs4936651(1),rs7937934(1),rs1944688(1),rs1944683(1),rs7108855(1),rs2156664(1),rs7121084(1),rs…
4	rs292071	28456089	9.65e-14	170	35	9	3	32	91	rs6448556(1),rs6824459(1),rs7676348(1),rs7677232(1),rs17680407(1),rs16880395(1),rs4423858(1),rs7654040(1),rs4267724(1),rs12507595(1),rs17682996(1),rs2036184(1),rs11735854(1),rs13111729(1),rs13139194(1),rs12512541(1),rs7695014(1),rs13145217(1),rs557840(1),rs1282883(1),rs1397439(1),rs1995910(1),rs4692318(1),rs6837053(1),rs1355333(1),rs7693080(1),rs10939209(1),rs7677277(1),rs7678223(1),rs4571317(1),…
10	rs4749821	8801845	9.67e-14	12	0	0	0	1	11	rs17144411(1),rs1334557(1),rs4749819(1),rs1112278(1),rs7069425(1),rs7091279(1),rs11255928(1),rs11255929(1),rs720507(1),rs406742(1),rs12573107(1),rs10905474(1)
18	rs1895615	53701029	1.03e-13	9	0	1	1	0	7	rs918822(1),rs1424401(1),rs12458695(1),rs8091714(1),rs1820285(1),rs1035595(1),rs1477440(1),rs2551453(1)
10	rs1873309	106579771	1.3e-13	127	20	18	41	4	44	rs10509774(1),rs7914784(1),rs1404785(1),rs7897270(1),rs10509777(1),rs7068586(1),rs1586662(1),rs7073438(1),rs6584630(1),rs6584631(1),rs7901022(1),rs4598601(1),rs17775106(1),rs1525388(1),rs10509779(1),rs11192226(1),rs11596606(1),rs12244307(1),rs12246611(1),rs12246569(1),rs6584635(1),rs7068754(1),rs2177741(1),rs1404784(1),rs7076546(1),rs7087257(1),rs1525386(1),rs7096048(1),rs7096189(1),rs7080542(1),…
4	rs17576924	112219151	1.56e-13	13	0	0	0	0	13	rs6834509(1),rs7683934(1),rs11098115(1),rs6833281(1),rs7657119(1),rs7656968(1),rs7695007(1),rs4834781(1),rs10026245(1),rs10026336(1),rs6825161(1),rs7692766(1),rs6822712(1)
8	rs3857914	93184065	1.73e-13	10	0	0	1	1	8	rs7839607(1),rs1373529(1),rs6471328(1),rs10098681(1),rs1899898(1),rs6471335(1),rs11989418(1),rs11988656(1),rs967226(1),rs1444503(1)
7	rs10275909	97298821	1.94e-13	57	8	1	9	4	35	rs17168782(1),rs6946227(1),rs6957084(1),rs726143(1),rs6962416(1),rs11983313(1),rs6963652(1),rs10486003(1),rs17147602(1),rs17320229(1),rs17168880(1),rs7778739(1),rs7779100(1),rs17168885(1),rs2214232(1),rs13438714(1),rs974060(1),rs7809389(1),rs7784617(1),rs10251854(1),rs6948230(1),rs1558896(1),rs12537683(1),rs4729367(1),rs6465603(1),rs10268629(1),rs10246118(1),rs6943414(1),rs6955575(1),rs6962048(1)…
11	rs11604680	47457539	2.29e-13	210	20	6	22	50	112	rs7117404(1),rs752850(1),rs752848(1),rs2291444(1),rs2291443(1),rs3740691(1),rs3740690(1),rs2291119(1),rs326214(1),rs326217(1),rs11570094(1),rs2697923(1),rs1057233(1),rs7105851(1),rs10838698(1),rs10838699(1),rs10769258(1),rs4992357(1),rs896816(1),rs7940536(1),rs11601603(1),rs6485753(1),rs4752990(1),rs10838702(1),rs4752993(1),rs10769262(1),rs11605672(1),rs1377416(1),rs1534576(1),rs10769264(1),rs475…
20	rs3092502	44697431	2.3e-13	52	10	1	16	1	24	rs3848726(1),rs1537028(1),rs13037326(1),rs2903908(1),rs3091794(1),rs3092169(1),rs2425752(1),rs6074015(1),rs2868764(1),rs6131010(1),rs6017734(1),rs6131012(1),rs6065924(1),rs6104466(1),rs6032661(1),rs7265701(1),rs6065925(1),rs6032662(1),rs6065926(1),rs6131014(1),rs6131015(1),rs12480946(1),rs6074022(1),rs4812997(1),rs1009373(1),rs1569723(1),rs13040307(1),rs6074024(1),rs1800686(1),rs752118(1),rs18838…
11	rs7114833	79870120	2.3e-13	21	7	0	0	2	12	rs7928513(1),rs4553388(1),rs4453257(1),rs10751014(1),rs6591873(1),rs10792463(1),rs1944488(1),rs1944487(1),rs1944483(1),rs4281499(1),rs1528634(1),rs11604354(1),rs11231962(1),rs11231963(1)
6	rs4712371	19227667	2.43e-13	63	2	1	6	9	45	rs9383456(1),rs7776042(1),rs763687(1),rs1322532(1),rs2064081(1),rs2743005(1),rs2205741(1),rs2743014(1),rs2842412(1),rs12530087(1),rs4710887(1),rs12527801(1),rs4144554(1),rs1007239(1),rs2064177(1),rs9465279(1),rs9295421(1),rs9465305(1),rs1858513(1),rs12190312(1),rs1858512(1),rs12205682(1),rs9460316(1),rs9460319(1),rs4712374(1),rs9465325(1),rs1338443(1),rs10214554(1),rs13220020(1),rs16881986(1),rs9…
11	rs7476	46342834	2.69e-13	80	4	3	10	23	40	rs7116965(1),rs4426109(1),rs6485671(1),rs11038840(1),rs10437653(1),rs7127254(1),rs6485672(1),rs3809047(1),rs7936413(1),rs2046768(1),rs2279465(1),rs12574668(1),rs12283172(1),rs6485682(1),rs2291487(1),rs2864076(1),rs2171668(1),rs7951579(1),rs11038897(1),rs7930103(1),rs1472001(1),rs12574250(1),rs7130141(1),rs7112229(1),rs3802888(1),rs17197116(1),rs2902858(1),rs11038906(1),rs10160701(1),rs11819869(1)…
2	rs7606840	27243364	3.13e-13	126	2	0	13	2	109	rs3739081(1),rs3845684(1),rs4665904(1),rs828259(1),rs4665906(1),rs3806518(1),rs6716283(1),rs2060390(1),rs714447(1),rs999087(1),rs11126734(1),rs4665352(1),rs7602471(1),rs4665913(1),rs3885083(1),rs4665360(1),rs13027445(1),rs1560860(1),rs12470698(1),rs7589183(1),rs6547275(1),rs7603056(1),rs7589610(1),rs13405539(1),rs6710065(1),rs6756245(1),rs562311(1),rs509047(1),rs4665920(1),rs7557229(1),rs3843322(…
8	rs7817987	8596723	3.37e-13	29	7	0	0	0	22	rs17681846(1),rs13265046(1),rs11786349(1),rs17628982(1),rs4841020(1),rs4841021(1),rs7841391(1),rs7008835(1),rs7013902(1),rs10092694(1),rs1045528(1),rs13276537(1),rs10503395(1),rs13263480(1),rs3958881(1),rs7816149(1),rs7816450(1),rs13273769(1),rs17155162(1),rs4841092(1),rs4841096(1),rs11782826(1)
14	rs944376	57367706	3.4e-13	19	0	0	4	1	14	rs11622451(1),rs11627087(1),rs11622850(1),rs11625684(1),rs17093208(1),rs17092360(1),rs850260(1),rs864279(1),rs850254(1),rs1113616(1),rs12432775(1),rs944375(1),rs850279(1),rs9646156(1),rs709970(1),rs709976(1),rs709977(1),rs850269(1),rs17719756(1)
11	rs11030175	27992042	3.62e-13	95	0	0	5	0	90	rs10835227(1),rs4922796(1),rs4923483(1),rs7949124(1),rs10501088(1),rs6484328(1),rs11030149(1),rs1491856(1),rs4923489(1),rs7108639(1),rs1826333(1),rs4923490(1),rs4923492(1),rs4923493(1),rs4923494(1),rs1155328(1),rs7483620(1),rs1352864(1),rs2220672(1),rs4923498(1),rs6484337(1),rs1491846(1),rs2726838(1),rs1388544(1),rs2726837(1),rs7110491(1),rs10767675(1),rs1997086(1),rs11030161(1),rs7110708(1),rs71…
19	rs10442	18545341	3.84e-13	41	3	1	2	0	35	rs7258465(1),rs10405636(1),rs888669(1),rs1043327(1),rs2303692(1),rs2303693(1),rs748609(1),rs2303695(1),rs10164319(1),rs1560118(1),rs4808801(1),rs8103622(1),rs1560119(1),rs7246788(1),rs4808803(1),rs11672385(1),rs7256534(1),rs8111397(1),rs4808807(1),rs7251067(1),rs11670392(1),rs875396(1),rs10409346(1),rs10409408(1),rs7252707(1),rs8107347(1),rs1469412(1),rs8109573(1),rs4808136(1),rs4580317(1),rs4808…
17	rs413501	31556958	3.98e-13	7	0	0	5	2	0	rs9972933(1),rs9972931(1),rs9989471(1),rs12603954(1),rs17248832(1),rs17248839(1),rs17836738(1)
11	rs1878764	43746594	4.54e-13	78	37	1	2	4	34	rs1023956(1),rs2625390(1),rs2625387(1),rs11037491(1),rs12800492(1),rs11037498(1),rs4755720(1),rs7936371(1),rs2902373(1),rs10838139(1),rs11037532(1),rs9783372(1),rs11037536(1),rs11037539(1),rs7129385(1),rs4755731(1),rs11037545(1),rs10838145(1),rs7944241(1),rs7928182(1),rs4359199(1),rs12277307(1),rs7482725(1),rs7932905(1),rs7130849(1),rs4288745(1),rs10838157(1),rs7942595(1),rs11037589(1),rs4755735(…
10	rs1637570	118619529	4.99e-13	14	0	0	0	0	14	rs3095122(1),rs722564(1),rs1637558(1),rs1681748(1),rs1626678(1),rs10787730(1),rs10886014(1),rs1023551(1),rs11197835(1),rs1637572(1),rs1898354(1),rs2420308(1),rs10886038(1),rs1898357(1)
10	rs12774894	107448020	6.06e-13	60	0	0	0	0	60	rs7917135(1),rs7091254(1),rs7076193(1),rs10509792(1),rs10748881(1),rs11192496(1),rs10786872(1),rs9703795(1),rs12767146(1),rs10884185(1),rs2418765(1),rs10786875(1),rs4918167(1),rs10748882(1),rs12765875(1),rs10786877(1),rs10884188(1),rs10786880(1),rs10786881(1),rs10786882(1),rs10786883(1),rs17119209(1),rs12784619(1),rs12776996(1),rs7098086(1),rs11596354(1),rs7911178(1),rs1473185(1),rs7917899(1),rs4…
6	rs864664	101391916	6.98e-13	158	33	0	0	0	125	rs241819(1),rs4840132(1),rs7773661(1),rs240765(1),rs240766(1),rs12374612(1),rs240783(1),rs4461738(1),rs2001102(1),rs12660725(1),rs2398132(1),rs10457809(1),rs240762(1),rs12206564(1),rs11155496(1),rs12193960(1),rs12207086(1),rs6905221(1),rs6938440(1),rs11155596(1),rs7740826(1),rs2036052(1),rs12209887(1),rs6904959(1),rs1039031(1),rs1039032(1),rs11155606(1),rs10872622(1),rs7748644(1),rs13208757(1),rs…
7	rs2894132	97384107	8.12e-13	40	25	0	2	1	12	rs2072100(1),rs3779470(1),rs4526299(1),rs4602814(1),rs12532490(1),rs12534885(1),rs6465615(1),rs2394739(1),rs12536903(1),rs10486008(1),rs2017923(1),rs2530131(1),rs1510304(1),rs1229537(1),rs7800746(1)
8	rs1039139	115326009	1.03e-12	197	31	36	10	13	107	rs4445257(1),rs7842458(1),rs4367581(1),rs6997457(1),rs7001881(1),rs7002432(1),rs13266408(1),rs13273646(1),rs4281140(1),rs4620312(1),rs7006291(1),rs11779159(1),rs11783996(1),rs12549856(1),rs7845243(1),rs10099990(1),rs10086149(1),rs10089040(1),rs12675001(1),rs9942776(1),rs12545601(1),rs7000905(1),rs9643084(1),rs12545023(1),rs10081528(1),rs12550281(1),rs4406427(1),rs7839086(1),rs11985374(1),rs139985…
5	rs2544809	176885499	1.25e-12	2	0	0	0	0	2	rs2630765(1),rs2630764(1)
5	rs10071688	103805502	1.32e-12	43	25	0	3	1	14	rs17344104(1),rs17403643(1),rs161457(1),rs161782(1),rs161788(1),rs161790(1),rs161791(1),rs324343(1),rs324342(1),rs161641(1),rs325513(1),rs12517106(1),rs1708598(1),rs1708599(1),rs1217471(1),rs1238521(1),rs1217461(1),rs1238883(1)
8	rs7812870	12667421	1.39e-12	7	0	0	7	0	0	rs10888128(1),rs10081610(1),rs4831828(1),rs4831373(1),rs4240185(1),rs4831830(1),rs4831837(1)
11	rs11022513	12840986	1.48e-12	35	1	2	1	6	25	rs9888258(1),rs9888181(1),rs11022496(1),rs4536195(1),rs11022509(1),rs11022512(1),rs2033908(1),rs10466408(1),rs10741604(1),rs12797960(1),rs10466378(1),rs4757060(1),rs10765992(1),rs7113256(1),rs12295774(1),rs12277874(1),rs1992334(1),rs1992335(1),rs1371753(1),rs10047490(1),rs1866705(1),rs1866706(1),rs1866707(1),rs6486065(1),rs4757953(1),rs1866710(1),rs11022517(1),rs11022518(1),rs11022519(1),rs122946…
4	rs7669969	31165942	1.78e-12	3	0	0	0	0	3	rs6818974(1),rs17779809(1),rs17723773(1)
1	rs6697696	197792255	1.94e-12	33	8	0	1	0	24	rs10922221(1),rs12142127(1),rs4915551(1),rs10922253(1),rs2111931(1),rs10737692(1),rs2884629(1),rs11799915(1),rs1747825(1),rs1775468(1),rs1775467(1),rs1775466(1),rs1775465(1),rs1775464(1),rs1747823(1),rs2454640(1),rs1499593(1),rs10922288(1),rs12740849(1),rs2133536(1),rs4915566(1),rs6428417(1),rs10922294(1),rs4915569(1),rs10922332(1)
9	rs2378665	86734219	2.05e-12	15	4	1	2	0	8	rs4471123(1),rs7025818(1),rs6559768(1),rs10746734(1),rs11140381(1),rs7038814(1),rs10868101(1),rs7848501(1),rs6559769(1),rs10868103(1)
1	rs839772	43873483	2.23e-12	20	2	0	1	0	17	rs1198979(1),rs839758(1),rs839768(1),rs839771(1),rs2782642(1),rs2782644(1),rs2782645(1),rs2782646(1),rs2842179(1),rs2039531(1),rs2782647(1),rs2842180(1),rs2782648(1),rs2842184(1),rs2782649(1),rs2027130(1),rs2782650(1),rs12410155(1)
14	rs2333484	29722492	2.24e-12	17	1	2	1	5	8	rs17114626(1),rs743122(1),rs743123(1),rs8006309(1),rs17561016(1),rs17114636(1),rs12147887(1),rs1956238(1),rs11161050(1),rs1956239(1),rs1950709(1),rs12590248(1),rs1307813(1),rs8011720(1)
7	rs2074640	77756275	2.35e-12	39	0	1	16	3	19	rs4727606(1),rs3807747(1),rs11761568(1),rs3779310(1),rs3779309(1),rs3779308(1),rs6976139(1),rs6951935(1),rs3807741(1),rs3807737(1),rs17593991(1),rs11761224(1),rs11766083(1),rs3807729(1),rs3823792(1),rs3807726(1),rs3807725(1),rs4296978(1),rs4412308(1),rs4296979(1),rs2868893(1),rs10808136(1),rs6958825(1),rs6944652(1),rs6466036(1),rs3807721(1),rs11770382(1),rs10486841(1),rs2074641(1),rs7812015(1),rs…
10	rs2496034	106539062	2.53e-12	40	12	2	2	0	24	rs11192148(1),rs11192151(1),rs11192152(1),rs11192156(1),rs1490182(1),rs2496013(1),rs2496009(1),rs2451471(1),rs2451470(1),rs1873306(1),rs1907033(1),rs2451469(1),rs2496004(1),rs2491379(1),rs2491377(1),rs2932556(1),rs1979635(1),rs1907038(1),rs2451495(1),rs2451496(1),rs1873307(1),rs1979636(1),rs2451498(1),rs3001931(1),rs703470(1),rs703478(1)
6	rs781471	125007327	2.7e-12	18	1	3	0	0	14	rs7774956(1),rs9388359(1),rs9375355(1),rs868549(1),rs9372788(1),rs715944(1),rs6569392(1),rs6569393(1),rs6923037(1),rs2875776(1),rs1415761(1),rs1415762(1),rs9491222(1),rs6569394(1)
2	rs13393304	637830	2.75e-12	78	0	0	0	2	76	rs2867131(1),rs7601009(1),rs4318419(1),rs2903495(1),rs2947413(1),rs2966403(1),rs2966402(1),rs2947412(1),rs2966401(1),rs2966400(1),rs17041285(1),rs17042105(1),rs2947411(1),rs2860323(1),rs2947410(1),rs6709992(1),rs7567570(1),rs7571872(1),rs11685767(1),rs4241320(1),rs7578764(1),rs5016125(1),rs939584(1),rs1320330(1),rs939583(1),rs939582(1),rs2867125(1),rs11688330(1),rs11127483(1),rs11127484(1),rs6719…
12	rs3751129	102455729	2.86e-12	15	0	0	5	1	9	rs17437668(1),rs10860840(1),rs11111172(1),rs950945(1),rs12426352(1),rs7308354(1),rs11111197(1),rs12371328(1),rs2373584(1),rs11111212(1),rs10860847(1),rs4764868(1),rs11111233(1),rs5742632(1),rs2195240(1)
9	rs2771046	23810888	2.95e-12	39	15	14	3	1	6	rs9298850(1),rs992548(1),rs16907731(1),rs1410846(1),rs12685552(1),rs16907779(1),rs3793602(1),rs10966087(1),rs7858335(1),rs10966135(1)
11	rs647905	121534938	2.99e-12	1	0	0	0	0	1	rs663175(1)
5	rs12153053	45108488	3.16e-12	122	104	4	0	1	13	rs10462084(1),rs2337413(1),rs17278764(1),rs10512880(1),rs17345947(1),rs17280692(1),rs1852599(1),rs13182397(1),rs13182862(1),rs13189744(1),rs13156000(1),rs4289567(1),rs13165915(1),rs13171302(1)
5	rs2135029	155856538	3.28e-12	132	1	13	35	27	56	rs30281(1),rs972324(1),rs1366228(1),rs4555777(1),rs12657973(1),rs12657569(1),rs11744424(1),rs4705002(1),rs11738065(1),rs10058119(1),rs11744154(1),rs11740347(1),rs4705005(1),rs1354565(1),rs2871924(1),rs4345305(1),rs1394607(1),rs10037772(1),rs7447475(1),rs1504946(1),rs2036556(1),rs4094450(1),rs13182616(1),rs11743060(1),rs11743063(1),rs4068396(1),rs10036928(1),rs6873000(1),rs17555767(1),rs7700863(1)…
3	rs4856222	82566370	3.41e-12	71	1	8	0	9	53	rs9817863(1),rs9850466(1),rs7617637(1),rs7649685(1),rs9834813(1),rs9850201(1),rs7429328(1),rs7427491(1),rs7427493(1),rs9856220(1),rs9818543(1),rs10865597(1),rs6548820(1),rs7426605(1),rs7635041(1),rs9854343(1),rs6548822(1),rs6792499(1),rs9825491(1),rs7631179(1),rs6548823(1),rs7633651(1),rs9868760(1),rs9831700(1),rs9873039(1),rs9856109(1),rs9836431(1),rs4856219(1),rs4856220(1),rs7428904(1),rs679459…
9	rs10821181	96379483	3.85e-12	68	8	4	4	14	38	rs13300936(1),rs11789176(1),rs10821128(1),rs6479484(1),rs6479485(1),rs10821131(1),rs10992749(1),rs10761229(1),rs10821135(1),rs10992751(1),rs4744243(1),rs952288(1),rs10821144(1),rs882851(1),rs6479492(1),rs10761239(1),rs4744257(1),rs10761240(1),rs2254712(1),rs2398845(1),rs2994369(1),rs10117225(1),rs10821177(1),rs10761243(1),rs2265575(1),rs2994365(1),rs10123378(1),rs2989753(1),rs2989755(1),rs1099280…
8	rs6469450	114179599	4.17e-12	83	23	0	22	19	19	rs13271162(1),rs10097818(1),rs16884058(1),rs2194601(1),rs11787239(1),rs13261160(1),rs13276278(1),rs231280(1),rs231282(1),rs231283(1),rs231288(1),rs231315(1),rs231313(1),rs231312(1),rs170760(1),rs231306(1),rs231305(1),rs231302(1),rs231301(1),rs231323(1),rs2125553(1),rs1532798(1),rs979896(1),rs7464518(1),rs2219898(1),rs9643080(1),rs6987567(1),rs12545448(1),rs9297496(1),rs10091527(1),rs7826889(1),rs…
3	rs7644389	17502918	4.59e-12	117	1	1	3	1	111	rs6442672(1),rs6794720(1),rs2733484(1),rs2733519(1),rs2733518(1),rs2348001(1),rs7617933(1),rs2733516(1),rs1597393(1),rs2122368(1),rs1449886(1),rs1375817(1),rs2596672(1),rs1375818(1),rs2733502(1),rs2733501(1),rs2733500(1),rs2733498(1),rs2060629(1),rs2733497(1),rs2470583(1),rs2596637(1),rs1449881(1),rs2596638(1),rs2596639(1),rs2596640(1),rs2348003(1),rs2596643(1),rs2348004(1),rs2596645(1),rs2596646…
15	rs1347473	47927920	5.49e-12	32	10	0	1	6	15	rs16959669(1),rs1435737(1),rs7183575(1),rs7173754(1),rs16959671(1),rs4774499(1),rs16959719(1),rs6493284(1),rs1369641(1),rs999128(1),rs999130(1),rs10775135(1),rs3985872(1),rs2573564(1),rs2573566(1),rs1912633(1),rs1369636(1),rs2573572(1),rs8031070(1),rs12594800(1),rs1912637(1),rs16959924(1)
19	rs2613766	5066995	7.22e-12	44	1	3	4	9	27	rs2123731(1),rs10853981(1),rs400263(1),rs390027(1),rs401002(1),rs389354(1),rs495555(1),rs632616(1),rs753842(1),rs4807005(1),rs197145(1),rs197142(1),rs4807676(1),rs4807677(1),rs6510833(1),rs10409229(1),rs12459464(1),rs263049(1),rs263068(1),rs10426930(1),rs10518242(1),rs4807682(1),rs877287(1),rs16992771(1),rs735468(1),rs858415(1),rs2054519(1),rs2620857(1),rs1017821(1),rs2620854(1),rs1552046(1),rs26…
20	rs6030812	42001011	7.29e-12	10	1	2	0	0	7	rs6030762(1),rs4810382(1),rs2205776(1),rs6030766(1),rs2179470(1),rs1014732(1),rs6017066(1)
18	rs7242858	39301598	7.73e-12	82	10	11	4	1	56	rs1845925(1),rs9675507(1),rs2848763(1),rs7238895(1),rs2612341(1),rs2848771(1),rs2587631(1),rs2587630(1),rs16974995(1),rs16974999(1),rs16975000(1),rs16975004(1),rs16975007(1),rs10502770(1),rs16975010(1),rs16975012(1),rs16975017(1),rs16975020(1),rs16975021(1),rs16975022(1),rs16975025(1),rs1942065(1),rs10502771(1),rs8098315(1),rs10502772(1),rs6507424(1),rs4404160(1),rs8087434(1),rs9965809(1),rs73435…
2	rs10175706	104631814	8.72e-12	40	12	19	1	1	7	rs2119507(1),rs17029462(1),rs12622900(1),rs6543235(1),rs17029484(1),rs7582634(1),rs7581688(1),rs12474171(1),rs1879268(1)
2	rs1344707	185766001	9.02e-12	59	6	3	15	7	28	rs17430209(1),rs17508275(1),rs7597593(1),rs11892742(1),rs6723680(1),rs2199883(1),rs13424507(1),rs13028349(1),rs16826219(1),rs7605689(1),rs12693396(1),rs7558878(1),rs11890843(1),rs6709436(1),rs11892843(1),rs7590852(1),rs1366840(1),rs4666994(1),rs4666995(1),rs7594906(1),rs725617(1),rs1344706(1),rs2059924(1),rs2059923(1),rs1583049(1),rs6722992(1),rs6755404(1),rs10931156(1),rs4667000(1),rs4667001(1),…
1	rs4132509	243943084	9.29e-12	31	0	0	0	1	30	rs10927025(1),rs2994329(1),rs4658574(1),rs9428576(1),rs1058304(1),rs12140414(1),rs10737888(1),rs4515770(1),rs7538011(1),rs7517340(1),rs2291409(1),rs12744297(1),rs12037013(1),rs6671475(1),rs10927046(1),rs10754807(1),rs2290754(1),rs12032342(1),rs320320(1),rs4478795(1),rs10803152(1),rs10927059(1),rs7517921(1),rs12140040(1),rs12143245(1),rs10927060(1),rs2034915(1),rs2125230(1),rs4553169(1),rs12031994…
3	rs10804719	147117260	9.74e-12	33	0	0	0	5	28	rs1814982(1),rs7648442(1),rs9851546(1),rs7622107(1),rs9289745(1),rs10935664(1),rs2279832(1),rs1875748(1),rs9631465(1),rs3852000(1),rs9833875(1),rs9289748(1),rs16859444(1),rs9289749(1),rs9852407(1),rs16859457(1),rs12107945(1),rs11914998(1),rs1566797(1),rs9818183(1),rs2089076(1),rs16859472(1),rs6765994(1),rs9858940(1),rs9858966(1),rs12629668(1),rs12632762(1),rs9847935(1),rs1027696(1),rs1027695(1),r…
2	rs10165889	164879903	1.13e-11	109	42	5	38	9	15	rs4145309(1),rs17205354(1),rs1529997(1),rs1123172(1),rs10164803(1),rs6432776(1),rs165212(1),rs165235(1),rs165231(1),rs165226(1),rs165224(1),rs7561021(1),rs1516296(1),rs2176238(1),rs10207936(1),rs10184267(1),rs13396647(1),rs1546631(1),rs6720452(1),rs1446475(1),rs17351639(1),rs4283437(1),rs7603599(1),rs7580181(1),rs6707353(1),rs6736327(1),rs967184(1),rs4667455(1),rs4667456(1),rs12476846(1),rs124687…
3	rs9840953	88098636	1.59e-11	142	6	0	6	1	129	rs17467509(1),rs2099229(1),rs9863076(1),rs1503433(1),rs2016224(1),rs7652406(1),rs17025241(1),rs1051436(1),rs1063603(1),rs1051413(1),rs6777019(1),rs2116149(1),rs1063597(1),rs1006896(1),rs3732776(1),rs2735556(1),rs1006895(1),rs2735559(1),rs2049817(1),rs959050(1),rs4858981(1),rs4858983(1),rs13098157(1),rs4611846(1),rs4858985(1),rs9310067(1),rs4858994(1),rs9834501(1),rs7618472(1),rs11128021(1),rs9881…
6	rs9372196	109132237	1.62e-11	29	1	2	15	7	4	rs575210(1),rs555796(1),rs566575(1),rs507189(1),rs541020(1),rs497961(1),rs17372954(1),rs574217(1),rs487044(1),rs560084(1),rs568064(1),rs472656(1),rs1268129(1),rs1268128(1),rs4027745(1),rs4027749(1),rs9384688(1),rs12525442(1),rs12198410(1),rs12209602(1),rs2768541(1),rs2806368(1),rs2768535(1),rs13197784(1),rs17323643(1),rs2768561(1)
11	rs10742178	27613718	1.72e-11	20	5	2	1	1	11	rs4923445(1),rs11030014(1),rs11030016(1),rs11030029(1),rs11030030(1),rs6484307(1),rs11823126(1),rs988712(1),rs10835195(1),rs10767649(1),rs7116850(1),rs6416056(1),rs10742179(1)
4	rs11932274	28000670	1.73e-11	13	2	0	1	0	10	rs929620(1),rs6830015(1),rs11933574(1),rs16880055(1),rs2192532(1),rs1600001(1),rs1125825(1),rs2160112(1),rs10009280(1),rs10011212(1),rs2110506(1)
8	rs1838421	64961018	1.91e-11	82	1	0	9	21	51	rs2100347(1),rs2354861(1),rs13249618(1),rs896619(1),rs1452492(1),rs1452487(1),rs1217103(1),rs6992714(1),rs6988374(1),rs11997190(1),rs1406490(1),rs11994082(1),rs10113566(1),rs10099382(1),rs6472118(1),rs17215671(1),rs16930637(1),rs6472119(1),rs7834364(1),rs10109147(1),rs10957297(1),rs7824991(1),rs6980548(1),rs6991404(1),rs6995556(1),rs7016581(1),rs6983579(1),rs1520928(1),rs1915790(1),rs1996708(1),r…
1	rs4658169	91154809	1.93e-11	10	0	0	0	0	10	rs6659216(1),rs12120040(1),rs12354259(1),rs6672311(1),rs12116456(1),rs12401375(1),rs6679774(1),rs6692497(1),rs12133316(1),rs17131133(1)
6	rs12529103	67519342	2.05e-11	47	6	0	4	17	20	rs1026388(1),rs4710324(1),rs1349981(1),rs9345875(1),rs9354462(1),rs9345879(1),rs9342572(1),rs9363624(1),rs9345880(1),rs994377(1),rs6912980(1),rs9354463(1),rs4639316(1),rs4286759(1),rs11752392(1),rs1020674(1),rs16898736(1),rs12211123(1),rs2085206(1),rs12213144(1),rs12190949(1),rs12192940(1),rs10447347(1),rs11751901(1),rs4710624(1),rs12189704(1),rs13199474(1),rs12195065(1),rs11754594(1),rs4644032(1…
2	rs4851057	105939237	2.1e-11	14	0	0	7	6	1	rs2576751(1),rs893248(1),rs2241801(1),rs873738(1),rs2679860(1),rs1561237(1),rs2164718(1),rs2679874(1),rs1010746(1),rs1054250(1),rs1469939(1),rs4851758(1),rs2679861(1),rs2033724(1)
2	rs521095	45113852	2.29e-11	0	0	0	0	0	0	NONE
16	rs17284098	83390078	2.4e-11	56	2	3	1	9	41	rs11646757(1),rs17676884(1),rs17677195(1),rs17750019(1),rs17750108(1),rs17677749(1),rs17677772(1),rs756460(1),rs10514583(1),rs11649018(1),rs2875784(1),rs2325934(1),rs10514582(1),rs10514580(1),rs16960234(1),rs12325503(1),rs10514578(1),rs17210599(1),rs10514575(1),rs17211371(1),rs1424168(1),rs17211581(1),rs17284265(1),rs17284390(1),rs11643197(1),rs2306903(1),rs1125292(1),rs11639762(1),rs17212733(1),…
11	rs7936998	57639017	2.52e-11	72	5	0	6	11	50	rs11603020(1),rs3824988(1),rs4926(1),rs11607122(1),rs10896632(1),rs7102271(1),rs1783983(1),rs1631684(1),rs1613592(1),rs10896633(1),rs1798173(1),rs499188(1),rs1783818(1),rs12805841(1),rs1783980(1),rs488769(1),rs1783981(1),rs1783978(1),rs12804972(1),rs1783979(1),rs1785499(1),rs1647405(1),rs11229109(1),rs11607056(1),rs7117020(1),rs2956981(1),rs9420(1),rs3017889(1),rs11570176(1),rs10792110(1),rs46112…
2	rs12328348	60785937	2.52e-11	4	1	0	1	0	2	rs7565301(1),rs6747156(1),rs3765154(1)
4	rs4546191	139847208	2.67e-11	31	2	5	17	0	7	rs6829538(1),rs4525924(1),rs6535770(1),rs13140121(1),rs6858505(1),rs6833428(1),rs6858738(1),rs7659500(1),rs7682109(1),rs4863488(1),rs12504603(1),rs13116075(1),rs13142467(1),rs7687436(1),rs12186254(1),rs6824587(1),rs13137732(1),rs7656660(1),rs4535284(1),rs13128827(1),rs7693187(1),rs12651431(1),rs13141400(1),rs6818778(1)
2	rs1267067	162007748	2.73e-11	10	4	0	2	1	3	rs17705608(1),rs1267068(1),rs1559526(1),rs7568498(1),rs1040135(1),rs13413741(1)
9	rs2481552	17069699	2.82e-11	58	1	0	6	0	51	rs10962742(1),rs1538589(1),rs11792883(1),rs10962773(1),rs2153273(1),rs10511627(1),rs17824366(1),rs10810702(1),rs10962794(1),rs10156640(1),rs2492870(1),rs375152(1),rs454019(1),rs368289(1),rs447681(1),rs420115(1),rs389432(1),rs441761(1),rs914051(1),rs914049(1),rs366565(1),rs442431(1),rs399430(1),rs2815194(1),rs387903(1),rs369822(1),rs10962853(1),rs398715(1),rs405039(1),rs263562(1),rs263566(1),rs263…
2	rs10865398	73741497	2.94e-11	215	36	4	1	2	172	rs6546827(1),rs6706409(1),rs6710659(1),rs6747145(1),rs6748040(1),rs17008991(1),rs10165862(1),rs7576824(1),rs12465867(1),rs11126399(1),rs11689392(1),rs7580825(1),rs10179134(1),rs2421548(1),rs6755217(1),rs12995433(1),rs6755241(1),rs7564890(1),rs6730785(1),rs17349321(1),rs1918863(1),rs1534471(1),rs6705489(1),rs1881245(1),rs3813227(1),rs7598396(1),rs6753344(1),rs6740223(1),rs6707722(1),rs10190219(1),…
1	rs4659708	236899343	2.96e-11	41	7	11	8	2	13	rs10925176(1),rs7530563(1),rs10495382(1),rs4278367(1),rs12030126(1),rs819662(1),rs819666(1),rs707210(1),rs4659704(1),rs819639(1),rs707206(1),rs2039744(1),rs12048865(1),rs2288600(1),rs7555260(1),rs4659713(1),rs10737811(1),rs1803032(1),rs7522310(1),rs10754583(1),rs4659714(1),rs4659470(1),rs4120874(1)
16	rs11644876	49592271	2.97e-11	7	0	0	0	2	5	rs11647781(1),rs11643007(1),rs12923113(1),rs12924091(1),rs12445189(1),rs4785326(1),rs11076489(1)
9	rs2031830	30314032	3.06e-11	203	3	13	63	7	117	rs13290342(1),rs12338658(1),rs11791857(1),rs7853666(1),rs10117543(1),rs7863480(1),rs16915723(1),rs2769638(1),rs2031828(1),rs2031829(1),rs2666392(1),rs10117279(1),rs10121472(1),rs12341756(1),rs737590(1),rs10969593(1),rs12337293(1),rs10511849(1),rs10511850(1),rs13289541(1),rs9298917(1),rs7862057(1),rs7861866(1),rs9696659(1),rs2774643(1),rs12350111(1),rs1410378(1),rs12336737(1),rs10511856(1),rs12346…
3	rs4857400	94076779	3.51e-11	93	38	3	6	7	39	rs8178610(1),rs13085785(1),rs7644769(1),rs6791811(1),rs9844676(1),rs7653521(1),rs897184(1),rs7615886(1),rs13079023(1),rs1584928(1),rs1584925(1),rs12638900(1),rs1598226(1),rs4857299(1),rs1598223(1),rs1598220(1),rs4857069(1),rs6797842(1),rs12632233(1),rs4857329(1),rs12485753(1),rs6762431(1),rs6801125(1),rs4857091(1),rs2360103(1),rs6783548(1),rs1492014(1),rs13066686(1),rs7638440(1),rs11927117(1),rs1…
7	rs11971702	140120546	3.59e-11	3	2	1	0	0	0	NONE
16	rs1631193	77106074	3.62e-11	63	17	4	1	2	39	rs11640757(1),rs10514405(1),rs7197694(1),rs1472389(1),rs10514407(1),rs285019(1),rs285021(1),rs285022(1),rs285023(1),rs285024(1),rs285027(1),rs1485794(1),rs682517(1),rs589002(1),rs4544253(1),rs664408(1),rs662101(1),rs1683399(1),rs633316(1),rs10459865(1),rs11644671(1),rs1393430(1),rs11149959(1),rs11149960(1),rs12149026(1),rs10445054(1),rs12600205(1),rs11640246(1),rs12597829(1),rs7500211(1),rs139342…
9	rs958957	14434284	3.69e-11	13	2	0	1	3	7	rs373034(1),rs303737(1),rs991115(1),rs501360(1),rs111204(1),rs2039052(1),rs477720(1),rs1556032(1),rs192769(1),rs10961542(1),rs7851867(1)
2	rs6737187	226360417	4.06e-11	20	0	0	0	1	19	rs10184572(1),rs2048936(1),rs6436554(1),rs12614411(1),rs6753020(1),rs10933093(1),rs1431071(1),rs1897229(1),rs10933094(1),rs6713607(1),rs936068(1),rs11688542(1),rs718659(1),rs718660(1),rs7576524(1),rs7578595(1),rs12466468(1),rs11695839(1),rs10804326(1),rs10933096(1)
10	rs11599868	104201381	4.1e-11	37	5	2	0	14	16	rs10883689(1),rs550(1),rs11191157(1),rs12359517(1),rs10883701(1),rs11191170(1),rs5003331(1),rs11191189(1),rs3737243(1),rs10883710(1),rs2479551(1),rs772016(1),rs812799(1),rs12779689(1),rs2485374(1),rs2485376(1),rs2246775(1),rs2485378(1),rs1796765(1),rs772012(1),rs11591372(1),rs796427(1),rs772029(1),rs772025(1),rs12763439(1),rs12781714(1),rs4331020(1),rs11592574(1),rs1409312(1),rs11597058(1)
7	rs2191888	31382504	4.15e-11	2	0	0	0	1	1	rs9648371(1),rs17160110(1)
8	rs17603302	87136320	4.53e-11	35	14	8	0	3	10	rs11782151(1),rs11775441(1),rs17660230(1),rs6469702(1),rs4961077(1),rs17602780(1),rs7002473(1),rs11777360(1),rs17603897(1),rs11781321(1),rs9649960(1),rs3923637(1),rs2954344(1)
16	rs1974890	77269673	4.7e-11	18	1	0	0	10	7	rs2303259(1),rs11149971(1),rs9922281(1),rs9932327(1),rs7184316(1),rs8182187(1),rs8045096(1),rs17769233(1),rs7204495(1),rs6564415(1),rs7194724(1),rs1025319(1),rs9935921(1),rs1025318(1),rs7198006(1),rs7198588(1),rs4887899(1)
1	rs6425816	33832865	4.74e-11	35	29	1	0	2	3	rs4653095(1),rs6675264(1),rs4233201(1),rs6665131(1),rs16835476(1)
15	rs10450989	63846508	5.42e-11	35	21	1	10	0	3	rs10519212(1),rs7163492(1),rs8023466(1),rs10450963(1),rs8031233(1),rs2649(1),rs4438257(1),rs8041548(1),rs7178853(1),rs7175463(1),rs17186380(1),rs1962180(1),rs7162182(1)
2	rs10495910	44124055	5.93e-11	30	3	10	4	0	13	rs17496251(1),rs17496286(1),rs17496334(1),rs17424482(1),rs17424646(1),rs17031776(1),rs6741740(1),rs17496618(1),rs17496638(1),rs4129191(1),rs10170954(1),rs6727861(1),rs6756714(1),rs4131366(1),rs7590995(1),rs2878042(1),rs17425397(1)
16	rs16962221	13602800	6.14e-11	48	14	8	17	8	1	rs7195242(1),rs17263080(1),rs11641181(1),rs8050603(1),rs2866474(1),rs7204469(1),rs7191159(1),rs7191163(1),rs2903305(1),rs4781484(1),rs2188744(1),rs2188743(1),rs2214189(1),rs9788787(1),rs11075199(1),rs6498415(1),rs8051802(1),rs1013040(1),rs916069(1),rs916070(1),rs2078548(1),rs16962113(1),rs11641984(1),rs2226996(1),rs9930242(1),rs8057032(1)
1	rs2788371	44343962	6.32e-11	42	17	2	1	0	22	rs2069385(1),rs11210922(1),rs12037700(1),rs3791085(1),rs3791092(1),rs2428854(1),rs783303(1),rs2486011(1),rs3120802(1),rs3120803(1),rs1636876(1),rs2242637(1),rs2428955(1),rs2486013(1),rs12045544(1),rs2906596(1),rs2486008(1),rs2486006(1),rs7555(1),rs2248253(1),rs2248829(1),rs1362153(1),rs1766967(1)
1	rs785275	33319703	6.52e-11	43	20	2	1	1	19	rs12022461(1),rs4951771(1),rs360524(1),rs10914611(1),rs2282293(1),rs1765223(1),rs10798918(1),rs6677618(1),rs10914625(1),rs2787120(1),rs12027258(1),rs1284366(1),rs1300114(1),rs1746661(1),rs1570569(1),rs1284373(1),rs194637(1),rs194640(1),rs171837(1),rs194641(1),rs194648(1)
16	rs7188399	60713434	6.77e-11	55	2	4	6	16	27	rs12919334(1),rs1436031(1),rs12445861(1),rs8046787(1),rs12933364(1),rs8049412(1),rs11641235(1),rs4785119(1),rs11645487(1),rs1982398(1),rs1982397(1),rs8044054(1),rs1562802(1),rs16962361(1),rs7194802(1),rs1901117(1),rs9935684(1),rs9931715(1),rs9934265(1),rs11076398(1),rs7204510(1),rs9929263(1),rs13338531(1),rs2060666(1),rs1862742(1),rs1545439(1),rs2290180(1),rs1544806(1),rs9927530(1),rs1423882(1),r…
12	rs7978875	24195619	6.96e-11	31	0	3	1	1	26	rs2971158(1),rs7980561(1),rs16926774(1),rs4635171(1),rs12424756(1),rs17401403(1),rs1566333(1),rs12812172(1),rs12300648(1),rs17482674(1),rs10505928(1),rs16927047(1),rs10505930(1),rs17405551(1),rs17405662(1),rs7305474(1),rs7132135(1),rs7302982(1),rs7303117(1),rs11047241(1),rs1391791(1),rs12828700(1),rs17485141(1),rs7964057(1),rs7306437(1),rs7975681(1),rs7978583(1),rs1498885(1)
3	rs4600827	85958384	7.29e-11	46	16	9	16	0	5	rs6778895(1),rs892366(1),rs17514709(1),rs17449172(1),rs6776839(1),rs2326314(1),rs10511079(1),rs11925844(1),rs17458714(1),rs7631617(1),rs7651291(1),rs13320560(1),rs9840565(1),rs13082138(1),rs9877300(1),rs10084716(1),rs10084664(1),rs7646410(1),rs4364177(1),rs9850482(1),rs9879903(1)
9	rs1475546	120533422	7.5e-11	87	2	6	2	0	77	rs551760(1),rs7856483(1),rs7870814(1),rs7860332(1),rs10818076(1),rs10818079(1),rs7350246(1),rs10818080(1),rs10818081(1),rs10818083(1),rs756136(1),rs756135(1),rs943840(1),rs7846760(1),rs7860993(1),rs10759939(1),rs10739498(1),rs10818084(1),rs10759941(1),rs2149355(1),rs2149353(1),rs3945581(1),rs7848124(1),rs1887780(1),rs4837502(1),rs4837503(1),rs10983772(1),rs10114960(1),rs10123941(1),rs10123955(1),…
8	rs7004796	42450170	7.52e-11	40	3	0	0	0	37	rs6988483(1),rs6988493(1),rs9643888(1),rs2272685(1),rs7818789(1),rs4361746(1),rs12542919(1),rs4737048(1),rs3935700(1),rs2974293(1),rs2974294(1),rs2974298(1),rs6980507(1),rs2923427(1),rs2923428(1),rs2974349(1),rs2923446(1),rs13250124(1),rs2923448(1),rs2974353(1),rs2974354(1),rs2084709(1),rs2923437(1),rs10958722(1),rs2974309(1),rs2923441(1),rs2923442(1),rs2974342(1),rs2923399(1),rs2356610(1),rs2923…
2	rs11889100	22553120	7.74e-11	12	0	0	0	0	12	rs6711112(1),rs7585241(1),rs7600146(1),rs12712388(1),rs7583826(1),rs1533046(1),rs2089626(1),rs7607130(1),rs937932(1),rs12987255(1),rs7607694(1),rs1509378(1)
14	rs17101957	104410305	8.07e-11	17	13	0	4	0	0	rs11623061(1),rs12589669(1),rs11626034(1),rs11623353(1)
6	rs6908553	27379372	8.24e-11	108	99	1	0	0	8	rs2235232(1),rs6914864(1),rs12529458(1),rs12664996(1),rs12197514(1),rs731132(1),rs1654774(1),rs1150668(1)
6	rs10945852	163030233	8.79e-11	26	2	2	2	0	20	rs9347667(1),rs9365471(1),rs2803058(1),rs9364664(1),rs9365472(1),rs4708970(1),rs2803056(1),rs9365473(1),rs10806760(1),rs9365475(1),rs9364666(1),rs2803035(1),rs7451965(1),rs9458639(1),rs12190823(1),rs10806762(1),rs1893537(1),rs10806763(1),rs10945860(1),rs9347683(1),rs9346929(1),rs9365484(1)
6	rs2347868	152251568	9.09e-11	61	49	2	0	2	8	rs9397456(1),rs9322345(1),rs6912184(1),rs4262200(1),rs3020393(1),rs985192(1),rs2982738(1),rs2347872(1),rs2179922(1),rs3020327(1)
9	rs13283523	127648182	9.3e-11	7	0	1	2	1	3	rs1051358(1),rs2304957(1),rs17328115(1),rs17249578(1),rs7031788(1),rs17328845(1)
4	rs4295265	102835645	9.57e-11	37	0	0	0	0	37	rs13117264(1),rs10446706(1),rs17266357(1),rs4699259(1),rs13146194(1),rs7656409(1),rs11929782(1),rs4698969(1),rs4699262(1),rs6833764(1),rs6811141(1),rs17266552(1),rs11931087(1),rs4276281(1),rs10516486(1),rs13145909(1),rs13129744(1),rs7682827(1),rs4698972(1),rs4365725(1),rs12331595(1),rs901406(1),rs10031172(1),rs17208914(1),rs6858108(1),rs2851333(1),rs2850395(1),rs11729100(1),rs7675363(1),rs6816285…
2	rs779985	125004689	1.03e-10	68	13	1	5	6	43	rs11902656(1),rs13033298(1),rs13033474(1),rs17011004(1),rs10496634(1),rs17011031(1),rs1529299(1),rs17011040(1),rs7561939(1),rs17011058(1),rs11902121(1),rs4848920(1),rs7594531(1),rs1170630(1),rs1170634(1),rs1170602(1),rs2163249(1),rs2699360(1),rs2699359(1),rs6541945(1),rs1170611(1),rs1170612(1),rs7583123(1),rs1184930(1),rs1170619(1),rs749196(1),rs1170621(1),rs1170626(1),rs780044(1),rs1919840(1),rs…
7	rs6959232	3376530	1.05e-10	97	23	4	7	0	63	rs10276303(1),rs17812271(1),rs10243425(1),rs4380831(1),rs1473659(1),rs1473657(1),rs1818932(1),rs7795899(1),rs7799953(1),rs7776539(1),rs10435014(1),rs9654984(1),rs7783666(1),rs12666381(1),rs10257982(1),rs9986772(1),rs9986894(1),rs4722654(1),rs10266927(1),rs10256447(1),rs7811244(1),rs10233166(1),rs7811286(1),rs10250444(1),rs4722663(1),rs7785994(1),rs7803993(1),rs12234397(1),rs12700789(1),rs4316064(…
3	rs13097782	35739575	1.11e-10	75	15	8	5	25	22	rs9811203(1),rs6766511(1),rs9828768(1),rs13062093(1),rs10490871(1),rs7642749(1),rs9875164(1),rs7612999(1),rs1542211(1),rs11129662(1),rs2884792(1),rs11720751(1),rs17201655(1),rs2280097(1),rs17280201(1),rs4678795(1),rs962038(1),rs1513475(1),rs3821447(1),rs2063648(1),rs13082065(1),rs6776685(1),rs13094598(1),rs2016767(1),rs2016955(1),rs2016975(1),rs1979576(1),rs7621646(1),rs6778899(1),rs7617572(1),rs…
9	rs17550617	23805555	1.11e-10	21	0	0	0	4	17	rs16907695(1),rs2891188(1),rs12057071(1),rs10491817(1),rs16907788(1),rs3793594(1),rs3793595(1),rs3793599(1),rs3793601(1),rs3793603(1),rs4977892(1),rs7869806(1),rs10811973(1),rs10811974(1),rs9695062(1),rs2383294(1),rs10966097(1),rs10811977(1),rs10811978(1),rs9650694(1),rs10966100(1)
1	rs2789444	164734457	1.14e-10	5	0	0	1	0	4	rs4657375(1),rs4480332(1),rs3767372(1),rs3767368(1),rs16835123(1)
5	rs1033108	49623598	1.15e-10	79	2	0	14	21	42	rs4865523(1),rs10068272(1),rs7446951(1),rs10062032(1),rs10074359(1),rs12697055(1),rs7722742(1),rs6876902(1),rs13179157(1),rs1033109(1),rs6868380(1),rs6897412(1),rs4337857(1),rs10039622(1),rs10040323(1),rs10064702(1),rs13154900(1),rs6874697(1),rs13172932(1),rs12332500(1),rs7710841(1),rs7722623(1),rs13174293(1),rs6892613(1),rs2137133(1),rs13185587(1),rs6450063(1),rs10042504(1),rs2883164(1),rs203690…
10	rs10996649	67524244	1.16e-10	33	0	0	1	2	30	rs10996528(1),rs10996532(1),rs12358314(1),rs10996538(1),rs10509229(1),rs7072432(1),rs10996598(1),rs10822610(1),rs10822612(1),rs10822613(1),rs10762004(1),rs10996614(1),rs7921567(1),rs7905467(1),rs7085632(1),rs7086079(1),rs4370819(1),rs10822623(1),rs7072338(1),rs10822629(1),rs10822630(1),rs10762011(1),rs12358889(1),rs12263767(1),rs10822633(1),rs10822635(1),rs3898311(1),rs12251350(1),rs12261532(1),r…
11	rs7933413	112958905	1.18e-10	11	0	0	2	2	7	rs17114685(1),rs17114689(1),rs17114757(1),rs17114801(1),rs17114821(1),rs1436109(1),rs10502168(1),rs11214508(1),rs11214511(1),rs10891511(1),rs7112370(1)
2	rs1981731	58923091	1.32e-10	21	0	4	6	3	8	rs4672249(1),rs1861414(1),rs2041813(1),rs7584990(1),rs11901148(1),rs4672252(1),rs10490091(1),rs4672255(1),rs12987544(1),rs17049716(1),rs13010437(1),rs741269(1),rs13010537(1),rs13418941(1),rs17049749(1),rs10182324(1),rs7562411(1)
18	rs11662416	50847784	1.53e-10	140	37	6	4	18	75	rs9950718(1),rs9950907(1),rs1943096(1),rs1943097(1),rs12605899(1),rs1943121(1),rs1943122(1),rs1943124(1),rs8097919(1),rs2276204(1),rs1943126(1),rs2298655(1),rs2298654(1),rs3819136(1),rs8096807(1),rs8097335(1),rs8084200(1),rs11659774(1),rs11663824(1),rs4632195(1),rs6508210(1),rs7231178(1),rs11664095(1),rs11082974(1),rs16956411(1),rs1078459(1),rs4939728(1),rs905761(1),rs4940251(1),rs8084830(1),rs75…
13	rs11618316	97259622	1.6e-10	70	6	9	4	25	26	rs9590321(1),rs7332078(1),rs10508027(1),rs7999737(1),rs475882(1),rs1788062(1),rs565851(1),rs565898(1),rs12428062(1),rs16951448(1),rs540213(1),rs11618831(1),rs11618119(1),rs11618312(1),rs11616787(1),rs11617369(1),rs11619600(1),rs11618559(1),rs11618566(1),rs9556578(1),rs1164597(1),rs7335011(1),rs7325236(1),rs7331513(1),rs7331050(1),rs7995242(1),rs8001566(1),rs9513146(1),rs16951476(1),rs9513148(1),r…
9	rs1333904	122674412	1.76e-10	21	0	0	1	0	20	rs10984729(1),rs1333911(1),rs13296973(1),rs10465137(1),rs12553064(1),rs1333910(1),rs10818400(1),rs7020938(1),rs7020855(1),rs1360694(1),rs1360693(1),rs1360692(1),rs7018808(1),rs7851213(1),rs1333909(1),rs10118916(1),rs7032155(1),rs17483782(1),rs1333908(1),rs1413325(1),rs7873013(1)
2	rs4853397	78736415	1.91e-10	109	42	1	1	11	54	rs6739457(1),rs17015360(1),rs17015366(1),rs17015370(1),rs7607586(1),rs7607664(1),rs1543140(1),rs1157602(1),rs12469848(1),rs6717041(1),rs6735382(1),rs4853395(1),rs11691001(1),rs1829123(1),rs1606995(1),rs1402682(1),rs1402679(1),rs10170943(1),rs1516254(1),rs1554469(1),rs1554468(1),rs13382494(1),rs13408192(1),rs6547206(1),rs1521506(1),rs7419388(1),rs12472183(1),rs12467896(1),rs10190509(1),rs12477072(…
10	rs1291824	11141731	2.06e-10	32	5	7	15	0	5	rs7087513(1),rs7068732(1),rs7894864(1),rs7896886(1),rs12769506(1),rs7902713(1),rs12359274(1),rs6602475(1),rs2762545(1),rs2773495(1),rs2773485(1),rs1291799(1),rs1291803(1),rs2224867(1),rs4354613(1),rs1750730(1),rs12245422(1),rs9424123(1),rs2399658(1),rs6602481(1)
5	rs12521971	61505488	2.29e-10	156	2	0	4	60	90	rs4498216(1),rs4235491(1),rs2910469(1),rs9291748(1),rs2961845(1),rs2940592(1),rs2910471(1),rs2961843(1),rs2940591(1),rs2940590(1),rs2940588(1),rs2910473(1),rs2961835(1),rs2940585(1),rs2961836(1),rs9291749(1),rs2962028(1),rs2962027(1),rs2910474(1),rs1423131(1),rs2910476(1),rs2961838(1),rs1876683(1),rs987960(1),rs10051806(1),rs10038739(1),rs1559211(1),rs1423120(1),rs11953146(1),rs17366217(1),rs1047…
15	rs281244	47663360	2.3e-10	32	16	0	0	0	16	rs1496922(1),rs1496923(1),rs735999(1),rs1807237(1),rs3371(1),rs737520(1),rs281281(1),rs281247(1),rs281248(1),rs281250(1),rs281251(1),rs166837(1),rs281253(1),rs281254(1),rs281255(1),rs281262(1)
16	rs1364063	69588572	2.31e-10	107	13	13	25	20	36	rs4783718(1),rs8045705(1),rs9925037(1),rs11075728(1),rs12447326(1),rs12596823(1),rs11643240(1),rs3848278(1),rs9936464(1),rs11639947(1),rs7198242(1),rs8055756(1),rs16958997(1),rs8049728(1),rs8061052(1),rs7187634(1),rs7189878(1),rs7191292(1),rs10852458(1),rs2361838(1),rs13329844(1),rs6499239(1),rs9788837(1),rs920191(1),rs2304526(1),rs9937018(1),rs7192380(1),rs9924953(1),rs3785075(1),rs9934681(1),rs…
10	rs7350463	56644401	2.4e-10	20	3	1	0	2	14	rs4545447(1),rs2384529(1),rs2384581(1),rs11814772(1),rs11004619(1),rs7350405(1),rs11813604(1),rs11815300(1),rs17511285(1),rs1377993(1),rs1121348(1),rs17512007(1),rs7073938(1),rs7077885(1),rs7099707(1),rs7099859(1)
18	rs11876382	42757086	2.44e-10	60	11	0	3	6	40	rs1868755(1),rs1349386(1),rs1965856(1),rs12150718(1),rs4890513(1),rs4890514(1),rs4890515(1),rs746341(1),rs13381583(1),rs13381286(1),rs16978272(1),rs4890516(1),rs17736585(1),rs1893484(1),rs1893483(1),rs12456896(1),rs12456921(1),rs11082422(1),rs17737032(1),rs17799371(1),rs1450811(1),rs1376232(1),rs1450809(1),rs1376228(1),rs719820(1),rs11872298(1),rs11875118(1),rs10502855(1),rs10502856(1),rs17738066…
2	rs360799	62953166	2.45e-10	87	14	0	11	1	61	rs10496097(1),rs17025438(1),rs11676135(1),rs17025634(1),rs1527961(1),rs2054837(1),rs11685524(1),rs11679934(1),rs11687746(1),rs6545962(1),rs4671431(1),rs6545963(1),rs6752597(1),rs11676339(1),rs4671043(1),rs4671044(1),rs4671045(1),rs10204410(1),rs7558681(1),rs7583570(1),rs6752010(1),rs1527959(1),rs6705835(1),rs6545968(1),rs11125936(1),rs1386399(1),rs2421713(1),rs11125941(1),rs974345(1),rs1872789(1)…
10	rs2491365	106536976	2.81e-10	82	35	20	4	10	13	rs2027113(1),rs7912178(1),rs2151970(1),rs2151971(1),rs12766925(1),rs4918125(1),rs12264935(1),rs7906784(1),rs11192187(1),rs10884043(1),rs902301(1),rs4144552(1),rs1490180(1),rs1490178(1),rs4918129(1),rs10884054(1),rs4918143(1),rs10884077(1),rs10884078(1),rs1890829(1),rs11192275(1),rs790647(1),rs790646(1),rs2864037(1),rs790640(1),rs2791460(1),rs11593612(1)
9	rs3750465	111900677	2.83e-10	44	10	0	0	2	32	rs7027263(1),rs874864(1),rs17729408(1),rs838835(1),rs11793272(1),rs1341214(1),rs17729523(1),rs1333344(1),rs10816767(1),rs1537431(1),rs10979660(1),rs11789624(1),rs646234(1),rs11792861(1),rs10512391(1),rs1003346(1),rs3750451(1),rs7850283(1),rs11788825(1),rs11794648(1),rs2900481(1),rs7470160(1),rs11788904(1),rs2271878(1),rs7870597(1),rs6825(1),rs12686736(1),rs17628095(1),rs17552292(1),rs10979727(1),…
8	rs4976985	143327271	2.84e-10	39	10	7	7	1	14	rs4129585(1),rs7465167(1),rs4325022(1),rs13262595(1),rs7828451(1),rs7822538(1),rs7822799(1),rs6583607(1),rs6583608(1),rs8180914(1),rs4976983(1),rs6583611(1),rs6583612(1),rs4601464(1),rs9644551(1),rs4976986(1),rs4976955(1),rs6983847(1),rs7832163(1),rs7822013(1),rs10099330(1),rs10102944(1)
3	rs4234649	117413844	2.87e-10	33	2	2	16	4	9	rs9816414(1),rs11707500(1),rs6799173(1),rs9838441(1),rs6770925(1),rs6438402(1),rs9810976(1),rs4549308(1),rs13089304(1),rs12486585(1),rs4419408(1),rs4333117(1),rs7623072(1),rs10470402(1),rs10470307(1),rs10934410(1),rs4687934(1),rs9839895(1),rs7638822(1),rs10934413(1),rs4368528(1),rs7622910(1),rs6438403(1),rs6788389(1),rs4579045(1),rs7638638(1),rs7613799(1),rs7646416(1),rs6775526(1)
6	rs1111810	145261448	2.95e-10	107	3	1	2	4	97	rs4896737(1),rs13215581(1),rs13195905(1),rs9390219(1),rs6915047(1),rs4896745(1),rs4243475(1),rs9403610(1),rs6920643(1),rs1538400(1),rs11546879(1),rs9399508(1),rs9399509(1),rs13213382(1),rs9399513(1),rs13210889(1),rs17074404(1),rs12175421(1),rs9321999(1),rs9403625(1),rs9376871(1),rs9399516(1),rs9390249(1),rs1538402(1),rs6914560(1),rs6934724(1),rs6935054(1),rs6935093(1),rs6935436(1),rs13198108(1),r…
7	rs11975039	114057109	3.04e-10	74	0	0	9	3	62	rs1916986(1),rs11768201(1),rs2690832(1),rs2690834(1),rs11769283(1),rs11762537(1),rs11976570(1),rs11767144(1),rs17372842(1),rs11764740(1),rs17373157(1),rs11762406(1),rs17313988(1),rs10953761(1),rs7781807(1),rs6953249(1),rs6953572(1),rs6953161(1),rs6953359(1),rs17137091(1),rs10953762(1),rs7784315(1),rs7801324(1),rs9641519(1),rs10953764(1),rs7799109(1),rs6951539(1),rs4495358(1),rs12532920(1),rs11771…
6	rs10948386	47829141	3.05e-10	85	3	0	3	8	71	rs10485320(1),rs9381618(1),rs7740768(1),rs1328970(1),rs693770(1),rs578532(1),rs474725(1),rs473606(1),rs971279(1),rs9395323(1),rs559768(1),rs563587(1),rs528229(1),rs479685(1),rs482434(1),rs496221(1),rs1199016(1),rs486444(1),rs536889(1),rs517025(1),rs564511(1),rs517226(1),rs500373(1),rs2039122(1),rs514974(1),rs5002163(1),rs1928288(1),rs1360074(1),rs1328973(1),rs1410827(1),rs1536815(1),rs1360077(1),…
8	rs17152841	10942929	3.05e-10	23	1	0	0	3	19	rs13275541(1),rs720081(1),rs12750(1),rs891558(1),rs17774398(1),rs10503410(1),rs11998382(1),rs17776497(1),rs2409654(1),rs17721866(1),rs12156345(1),rs4841458(1),rs11776368(1),rs10111872(1),rs6601548(1),rs7826139(1),rs13248264(1),rs7002523(1),rs7839837(1),rs3736014(1),rs3021496(1),rs17725044(1)
1	rs12046844	66238379	3.11e-10	37	0	2	28	0	7	rs7519977(1),rs1137100(1),rs10789184(1),rs12033452(1),rs4655518(1),rs4655680(1),rs3790427(1),rs3790425(1),rs3790424(1),rs1343981(1),rs10493379(1),rs6691346(1),rs1938487(1),rs6678033(1),rs7516341(1),rs1805096(1),rs7531867(1),rs1938492(1),rs12042779(1),rs12042807(1),rs11208711(1),rs4655584(1),rs4655585(1),rs2211651(1),rs2889195(1),rs6588158(1),rs4420065(1),rs7524581(1),rs12751974(1),rs12401401(1),r…
5	rs16902221	45740040	3.14e-10	18	0	0	0	0	18	rs4532370(1),rs12656485(1),rs1483308(1),rs10473389(1),rs7719500(1),rs16902199(1),rs2337954(1),rs10074312(1),rs4437383(1),rs13361609(1),rs6894273(1),rs6894784(1),rs16902217(1),rs12109155(1),rs6886950(1),rs4626346(1),rs4282323(1),rs12109205(1)
17	rs2193002	55656286	3.3e-10	7	0	0	0	0	7	rs16958521(1),rs17834633(1),rs1974692(1),rs4793874(1),rs4793875(1),rs2041852(1),rs17761974(1)
12	rs12297948	19173081	3.31e-10	40	0	7	1	7	25	rs10770410(1),rs4143503(1),rs10841121(1),rs11044373(1),rs7974272(1),rs12304027(1),rs11044374(1),rs11044375(1),rs12307404(1),rs6486925(1),rs6486926(1),rs6486927(1),rs1021383(1),rs10505835(1),rs7970968(1),rs7974977(1),rs4426179(1),rs12320249(1),rs11044379(1),rs16914959(1),rs2138062(1),rs7134452(1),rs11044385(1),rs11044387(1),rs11044392(1),rs1514828(1),rs7956266(1),rs12303104(1),rs12811600(1),rs1018…
1	rs1148612	190337198	3.67e-10	152	32	10	34	15	61	rs17374523(1),rs17374656(1),rs1333322(1),rs10920655(1),rs1539473(1),rs1333320(1),rs879963(1),rs2095171(1),rs4845230(1),rs1592245(1),rs16832195(1),rs2104927(1),rs6665930(1),rs4399162(1),rs1831784(1),rs7416623(1),rs10920680(1),rs4845235(1),rs4373764(1),rs2419063(1),rs3762299(1),rs12081131(1),rs10920692(1),rs7535549(1),rs1540513(1),rs6671234(1),rs2293451(1),rs1782561(1),rs1782560(1),rs1182981(1),rs9…
2	rs12477385	166144850	3.7e-10	111	3	5	17	2	84	rs6727857(1),rs11889342(1),rs12619604(1),rs12619626(1),rs2075703(1),rs12468669(1),rs3769928(1),rs3769932(1),rs4667481(1),rs12469667(1),rs1947114(1),rs3769941(1),rs3769948(1),rs2163708(1),rs4566378(1),rs10167223(1),rs1579865(1),rs7580734(1),rs6731083(1),rs4296442(1),rs12612104(1),rs6718242(1),rs16850426(1),rs16850433(1),rs3943809(1),rs4667808(1),rs16850454(1),rs6744911(1),rs764660(1),rs4667810(1),…
4	rs2289164	147878242	4.11e-10	90	2	14	18	20	36	rs4273486(1),rs4568258(1),rs6851396(1),rs7671336(1),rs1509328(1),rs13133196(1),rs12647139(1),rs6824183(1),rs952639(1),rs1949036(1),rs16998691(1),rs10446756(1),rs7673150(1),rs2357277(1),rs12504096(1),rs10519824(1),rs2036728(1),rs17022013(1),rs2136366(1),rs4835349(1),rs2357280(1),rs6840804(1),rs1396718(1),rs1876765(1),rs1022074(1),rs6537434(1),rs10018635(1),rs10011144(1),rs6816827(1),rs7697716(1),r…
8	rs12542289	139310880	4.59e-10	12	0	0	0	0	12	rs1512385(1),rs1398293(1),rs7840029(1),rs6988796(1),rs7011653(1),rs11166811(1),rs10105423(1),rs9650543(1),rs16908871(1),rs12546144(1),rs11782838(1),rs16908884(1)
9	rs11243587	134861101	4.81e-10	2	0	1	0	0	1	rs10901115(1)
2	rs2020213	178833406	4.88e-10	222	33	16	22	21	130	rs12989020(1),rs4893985(1),rs1004541(1),rs3770023(1),rs13012431(1),rs12987101(1),rs17400512(1),rs1347731(1),rs13392051(1),rs6726321(1),rs6734520(1),rs12622125(1),rs3754991(1),rs3770028(1),rs4893987(1),rs1561319(1),rs1438039(1),rs3770034(1),rs1561320(1),rs4893839(1),rs6756240(1),rs11684634(1),rs1866209(1),rs1866208(1),rs2164857(1),rs1344917(1),rs749207(1),rs749208(1),rs998059(1),rs1438048(1),rs489…
7	rs7786940	114918175	5.07e-10	19	5	6	3	5	0	rs11767403(1),rs10953778(1),rs11976110(1),rs7782721(1),rs6976286(1),rs13237486(1),rs13237551(1),rs2214110(1)
5	rs4143531	154978195	5.58e-10	97	5	1	0	1	90	rs10223159(1),rs12654025(1),rs17117307(1),rs10476819(1),rs7703076(1),rs10058975(1),rs1564801(1),rs3929283(1),rs1594061(1),rs1594062(1),rs9324810(1),rs9324813(1),rs17117358(1),rs7715760(1),rs7716127(1),rs6580153(1),rs10213863(1),rs17117389(1),rs10073394(1),rs1023680(1),rs6866674(1),rs1960290(1),rs1988694(1),rs12652180(1),rs10036375(1),rs2872329(1),rs873880(1),rs10042751(1),rs2162965(1),rs1820794(1…
20	rs13045771	44780406	5.68e-10	4	0	2	1	0	1	rs2425761(1),rs2425764(1)
16	rs6416794	51181735	6.07e-10	3	0	0	0	1	2	rs1465338(1),rs1965024(1),rs1108343(1)
11	rs11030414	28726670	6.13e-10	56	4	0	1	10	41	rs4414202(1),rs481554(1),rs10501102(1),rs546541(1),rs489437(1),rs516756(1),rs534026(1),rs1914471(1),rs520869(1),rs1879445(1),rs547869(1),rs530349(1),rs536136(1),rs545454(1),rs10835397(1),rs502249(1),rs522234(1),rs7118736(1),rs558048(1),rs544724(1),rs10835400(1),rs1517573(1),rs4028106(1),rs498197(1),rs10835404(1),rs557966(1),rs1400754(1),rs1949417(1),rs1517570(1),rs9804411(1),rs1517564(1),rs122930…
3	rs6808257	155351447	6.22e-10	82	1	3	9	6	63	rs12637907(1),rs1125539(1),rs1125538(1),rs359545(1),rs359546(1),rs168601(1),rs359553(1),rs536008(1),rs578492(1),rs359539(1),rs517971(1),rs484663(1),rs359557(1),rs189639(1),rs359560(1),rs359566(1),rs359567(1),rs359568(1),rs359569(1),rs359570(1),rs12632699(1),rs3908144(1),rs1914799(1),rs1607590(1),rs1607591(1),rs3908140(1),rs6768777(1),rs9874559(1),rs3908141(1),rs12486000(1),rs9818926(1),rs1401695(…
15	rs2159620	97503841	6.25e-10	1	1	0	0	0	0	NONE
8	rs10098474	9911617	6.36e-10	11	0	0	0	1	10	rs17150826(1),rs7836428(1),rs6987910(1),rs17150993(1),rs1980262(1),rs17151026(1),rs4840463(1),rs17151108(1),rs17151140(1),rs17151145(1),rs17151147(1)
11	rs10742218	29272543	6.85e-10	25	9	6	8	0	2	rs2055015(1),rs11601263(1),rs1491811(1),rs16918650(1),rs16918669(1),rs2035841(1),rs16918737(1),rs16918760(1),rs2467596(1),rs1502448(1)
6	rs2071303	26091336	7.09e-10	47	12	17	9	7	2	rs3799346(1),rs942377(1),rs1324082(1),rs1575534(1),rs942378(1),rs7753366(1),rs6913879(1),rs1408273(1),rs9393672(1),rs428469(1),rs9379801(1),rs7749342(1),rs199741(1),rs9393676(1),rs9295678(1),rs2051541(1),rs10425(1),rs6918586(1)
5	rs175874	167015105	7.1e-10	1	0	0	0	1	0	rs1808380(1)
5	rs4958617	152540026	7.34e-10	39	7	5	7	0	20	rs1438946(1),rs10044974(1),rs10042383(1),rs4958611(1),rs2910023(1),rs10073138(1),rs2910032(1),rs17501548(1),rs2962822(1),rs2973141(1),rs2615165(1),rs296174(1),rs1030192(1),rs188436(1),rs172451(1),rs296178(1),rs296179(1),rs7722746(1),rs11960462(1),rs11957080(1),rs304853(1),rs304855(1),rs304844(1),rs304846(1),rs160063(1),rs160064(1),rs304841(1)
3	rs9862931	108003136	8.59e-10	57	4	0	0	4	49	rs17827915(1),rs17231503(1),rs1456717(1),rs1456716(1),rs1531190(1),rs1531189(1),rs6795542(1),rs1456715(1),rs1870007(1),rs13084160(1),rs9812462(1),rs7632607(1),rs4855630(1),rs4855631(1),rs4855632(1),rs9872399(1),rs9883054(1),rs2100581(1),rs9822752(1),rs1456713(1),rs1902521(1),rs2061245(1),rs2012256(1),rs6771609(1),rs1463424(1),rs7643006(1),rs936265(1),rs9816904(1),rs936262(1),rs936261(1),rs6805570…
2	rs7594041	22083570	8.64e-10	23	0	0	1	0	22	rs994724(1),rs1159582(1),rs1850838(1),rs1022377(1),rs1022378(1),rs10495723(1),rs11686682(1),rs6736076(1),rs10206438(1),rs6743762(1),rs2338563(1),rs6548001(1),rs17674649(1),rs2139352(1),rs2176696(1),rs1356704(1),rs7588317(1),rs10206997(1),rs7575276(1),rs1401651(1),rs13409521(1),rs7595937(1),rs329783(1)
20	rs6022191	51585266	8.81e-10	9	0	0	1	0	8	rs6022174(1),rs16997287(1),rs4560188(1),rs6013574(1),rs6013576(1),rs1884889(1),rs6097170(1),rs8115431(1),rs6013586(1)
21	rs8129315	46498863	9.45e-10	34	0	0	0	0	34	rs2838768(1),rs8134789(1),rs2838815(1),rs2838821(1),rs13047598(1),rs9753963(1),rs2838828(1),rs8134392(1),rs2838829(1),rs9977178(1),rs2838831(1),rs2838832(1),rs2838833(1),rs2838834(1),rs2838840(1),rs2838842(1),rs1999334(1),rs1006779(1),rs2838845(1),rs8126930(1),rs2236445(1),rs1056099(1),rs2838854(1),rs2838857(1),rs3673(1),rs2255761(1),rs2255766(1),rs2838859(1),rs2838860(1),rs2256000(1),rs2838862(1…
8	rs12547478	10579110	1.01e-09	17	2	7	7	0	1	rs11996321(1),rs12679869(1),rs1544980(1),rs7010709(1),rs6990589(1),rs11250082(1),rs11990167(1),rs1469557(1)
10	rs821202	107739563	1.01e-09	16	11	0	0	0	5	rs7075669(1),rs2644520(1),rs521495(1),rs821205(1),rs481179(1)
9	rs3104546	128137669	1.07e-09	47	1	0	0	0	46	rs2819622(1),rs1266009(1),rs1250505(1),rs1268539(1),rs6478705(1),rs7853181(1),rs7038668(1),rs2070113(1),rs10986780(1),rs7044663(1),rs7875713(1),rs7865246(1),rs4837018(1),rs12553637(1),rs10739663(1),rs12351538(1),rs571675(1),rs548793(1),rs10114882(1),rs509753(1),rs490234(1),rs569408(1),rs536861(1),rs521119(1),rs497531(1),rs506874(1),rs562004(1),rs577026(1),rs545900(1),rs476819(1),rs534214(1),rs542…
2	rs17194468	204252908	1.13e-09	107	41	13	13	1	39	rs17477528(1),rs1105935(1),rs13024221(1),rs13001933(1),rs13383137(1),rs13000658(1),rs12470529(1),rs2138380(1),rs6744699(1),rs6735994(1),rs1105047(1),rs6717924(1),rs13025713(1),rs7588864(1),rs17271393(1),rs17271400(1),rs6435149(1),rs7586383(1),rs12466376(1),rs12474455(1),rs2350807(1),rs12693968(1),rs13430786(1),rs7589059(1),rs12467506(1),rs12987781(1),rs7575056(1),rs17199242(1),rs17199249(1),rs760…
3	rs1381763	147791697	1.17e-09	0	0	0	0	0	0	NONE
16	rs11644916	359567	1.21e-09	15	0	4	4	1	6	rs1981492(1),rs3842949(1),rs3842950(1),rs3848361(1),rs11646942(1),rs9921222(1),rs11648673(1),rs2885415(1),rs758033(1),rs2361988(1),rs1204508(1)
4	rs4282124	164811970	1.21e-09	41	4	0	0	1	36	rs1494286(1),rs1494284(1),rs17474536(1),rs17474557(1),rs17474564(1),rs17474585(1),rs6821574(1),rs12640114(1),rs4431174(1),rs4132054(1),rs4566617(1),rs7667231(1),rs3890761(1),rs12501935(1),rs13127608(1),rs6828919(1),rs11100526(1),rs11100532(1),rs12505619(1),rs7686102(1),rs3967463(1),rs4056339(1),rs4056341(1),rs12500848(1),rs17578295(1),rs10517793(1),rs12499106(1),rs10517794(1),rs9308069(1),rs76789…
20	rs17123673	31409605	1.23e-09	19	7	0	0	8	4	rs17373229(1),rs17301126(1),rs743176(1),rs2424941(1),rs7272741(1),rs221984(1),rs221985(1),rs2424943(1),rs2424944(1),rs2424948(1),rs17396317(1),rs17305657(1)
15	rs17158396	83284439	1.24e-09	61	6	10	6	10	29	rs1045508(1),rs9944185(1),rs11856561(1),rs7180584(1),rs7173852(1),rs8037224(1),rs8042464(1),rs7166570(1),rs17269819(1),rs7173339(1),rs1501372(1),rs1846911(1),rs17354842(1),rs8041868(1),rs8034801(1),rs9920827(1),rs8023960(1),rs4778983(1),rs13380317(1),rs13380319(1),rs1501367(1),rs11854289(1),rs11854483(1),rs4778989(1),rs803686(1),rs3850610(1),rs17507216(1),rs2871011(1),rs17158413(1),rs17356118(1),…
5	rs11135357	164631708	1.29e-09	68	10	16	11	21	10	rs6879291(1),rs1421719(1),rs1345580(1),rs4868908(1),rs17072825(1),rs17072886(1),rs12513654(1),rs918373(1),rs1990866(1),rs4397144(1),rs253538(1),rs11135356(1),rs7715290(1),rs4291037(1),rs17332900(1),rs1156161(1),rs7728827(1),rs6870178(1),rs885477(1),rs4868918(1),rs4868919(1),rs4868920(1),rs11748440(1),rs4868753(1),rs13186057(1),rs11747437(1),rs11749187(1),rs13165528(1),rs11135361(1),rs1578900(1),r…
12	rs2720030	122181123	1.34e-09	15	0	2	5	0	8	rs10840649(1),rs7959418(1),rs7962930(1),rs12320939(1),rs11043312(1),rs2669164(1),rs2720036(1),rs925530(1),rs1976656(1),rs2707069(1),rs15797(1),rs3741593(1),rs2242259(1)
10	rs11188661	97960993	1.4e-09	4	0	0	2	2	0	rs7900838(1),rs10509706(1),rs7911684(1),rs4917727(1)
13	rs837305	101193705	1.53e-09	26	12	2	0	0	12	rs837344(1),rs837309(1),rs837314(1),rs1097595(1),rs11616731(1),rs11842969(1),rs9585460(1),rs9518088(1),rs4772307(1),rs9518092(1),rs9518096(1),rs7981664(1)
9	rs4240433	132008809	1.56e-09	23	0	5	0	1	17	rs325187(1),rs749840(1),rs913270(1),rs10739746(1),rs2104728(1),rs2104727(1),rs913266(1),rs927926(1),rs1556144(1),rs10819481(1),rs10119824(1),rs10819483(1),rs10819484(1),rs10760602(1),rs913773(1),rs883343(1),rs10819485(1),rs10760603(1)
12	rs10880067	41768111	1.57e-09	73	7	1	23	3	39	rs1918231(1),rs7973410(1),rs4768003(1),rs4768004(1),rs10880041(1),rs10880043(1),rs2141108(1),rs10880044(1),rs1609059(1),rs7298953(1),rs7133806(1),rs7315905(1),rs7299325(1),rs10467086(1),rs7959175(1),rs1997192(1),rs10785240(1),rs10748300(1),rs10748301(1),rs10785241(1),rs10735992(1),rs10880053(1),rs10785242(1),rs10785244(1),rs10506186(1),rs10506187(1),rs10785246(1),rs2049592(1),rs10880058(1),rs9411…
2	rs2309800	100992086	1.6e-09	108	2	6	13	1	86	rs11678979(1),rs6722241(1),rs6709656(1),rs4851264(1),rs7566527(1),rs13013169(1),rs893246(1),rs10496345(1),rs12991254(1),rs4851266(1),rs11689199(1),rs11689201(1),rs4851267(1),rs11687241(1),rs11695383(1),rs11684761(1),rs12990462(1),rs11693324(1),rs11686372(1),rs4303732(1),rs4851269(1),rs1160543(1),rs1160544(1),rs4851270(1),rs4851271(1),rs13034176(1),rs1122231(1),rs1465800(1),rs11123817(1),rs1465801…
2	rs6705330	203662197	1.64e-09	18	9	4	4	1	0	rs1949675(1),rs6709162(1),rs6758561(1),rs7581854(1),rs10176600(1)
5	rs12657057	107050754	1.66e-09	33	1	0	3	4	25	rs591470(1),rs685820(1),rs607976(1),rs641406(1),rs103840(1),rs10061771(1),rs12153493(1),rs872240(1),rs10045552(1),rs3844311(1),rs4145099(1),rs1990993(1),rs3864269(1),rs26724(1),rs26726(1),rs42449(1),rs17160272(1),rs12187753(1),rs17160287(1),rs1572255(1),rs17351315(1),rs7732784(1),rs7705512(1),rs13159331(1),rs7724655(1),rs1490839(1),rs12654281(1),rs6864800(1),rs154174(1),rs35521(1),rs1352724(1),rs…
4	rs1961547	83266333	2.01e-09	23	0	3	7	0	13	rs2583636(1),rs1964333(1),rs13150939(1),rs13119500(1),rs7692359(1),rs7692570(1),rs17353205(1),rs6822283(1),rs10012894(1),rs1427461(1),rs13150632(1),rs6838266(1),rs3944(1),rs1820577(1),rs12503762(1),rs997720(1),rs997721(1),rs6848299(1),rs2516818(1),rs8732(1)
7	rs6956399	133305729	2.08e-09	137	15	1	0	1	120	rs12707087(1),rs17576069(1),rs11765450(1),rs17654334(1),rs4728288(1),rs17597439(1),rs17656452(1),rs1862871(1),rs4363141(1),rs6967776(1),rs6968089(1),rs1364364(1),rs11980047(1),rs2432637(1),rs2432641(1),rs2991226(1),rs4731968(1),rs17167170(1),rs17658042(1),rs2042000(1),rs2911495(1),rs11768150(1),rs7777805(1),rs2066924(1),rs6955530(1),rs2430768(1),rs2345943(1),rs763645(1),rs7792396(1),rs7776986(1),…
2	rs7575544	103858181	2.09e-09	3	0	0	1	0	2	rs1728260(1),rs1680797(1),rs10204051(1)
4	rs1510925	62830533	2.19e-09	18	0	0	0	2	16	rs7695892(1),rs1376310(1),rs7690962(1),rs17239198(1),rs734644(1),rs17239205(1),rs10027079(1),rs10008326(1),rs12505782(1),rs1510923(1),rs1397545(1),rs1397544(1),rs17226349(1),rs1397543(1),rs7667199(1),rs10030755(1),rs1397548(1),rs17292142(1)
3	rs4542987	25174769	2.2e-09	55	32	9	4	3	7	rs4858705(1),rs6550949(1),rs6550950(1),rs1603983(1),rs17516853(1),rs17517019(1),rs11129184(1),rs6804502(1),rs2649618(1),rs2649619(1),rs17518622(1),rs17518818(1),rs1392117(1),rs1499644(1)
3	rs934588	70890207	2.21e-09	17	0	1	0	1	15	rs1435633(1),rs2037888(1),rs13076062(1),rs1579594(1),rs6549358(1),rs6549362(1),rs6801977(1),rs6776440(1),rs17007912(1),rs17745575(1),rs6805430(1),rs7638679(1),rs6790743(1),rs9837992(1),rs13065564(1),rs17651978(1)
11	rs1462219	41072962	2.22e-09	38	5	4	9	3	17	rs355255(1),rs10837542(1),rs7106119(1),rs355245(1),rs10837544(1),rs7114370(1),rs7125435(1),rs7125467(1),rs10501246(1),rs10742570(1),rs1381583(1),rs7932497(1),rs12224794(1),rs1381577(1),rs1907968(1),rs10837560(1),rs6485245(1),rs995986(1),rs4147442(1),rs4147443(1),rs1350917(1),rs355221(1),rs7103962(1),rs3903143(1),rs12806432(1),rs11036220(1),rs7107786(1),rs10837568(1),rs10742575(1)
16	rs1420611	49124454	2.23e-09	42	6	1	11	15	9	rs1548929(1),rs2080452(1),rs2908883(1),rs2967263(1),rs2967262(1),rs2908881(1),rs2160494(1),rs2967251(1),rs2967249(1),rs1355381(1),rs2967266(1),rs2967268(1),rs1543957(1),rs1397585(1),rs11860451(1),rs4602036(1),rs4602037(1),rs12929876(1),rs11076468(1),rs11649117(1),rs11649147(1),rs11642801(1),rs4099182(1),rs11648144(1),rs4393571(1),rs9930554(1),rs12445574(1),rs1898359(1),rs11076474(1),rs11647643(1)…
19	rs8099926	10778647	2.23e-09	48	9	9	9	7	14	rs3087689(1),rs6511703(1),rs3745255(1),rs875569(1),rs892084(1),rs3745249(1),rs892078(1),rs8106664(1),rs2043305(1),rs3087969(1),rs2288904(1),rs1560711(1),rs3859514(1),rs1560707(1),rs1053007(1),rs11085743(1),rs7250071(1),rs2569512(1),rs4425006(1),rs1529744(1),rs10775614(1),rs11670097(1),rs4804528(1),rs2043332(1),rs8106381(1),rs7257769(1),rs12611017(1),rs4804554(1),rs12610607(1),rs17766161(1)
12	rs1689410	89751641	2.26e-09	18	3	1	0	3	11	rs10161308(1),rs704076(1),rs770087(1),rs808820(1),rs10047634(1),rs7299774(1),rs1650342(1),rs1689408(1),rs7955644(1),rs7311138(1),rs7296703(1),rs7976283(1),rs12318428(1),rs12306658(1)
20	rs4814885	19691446	2.28e-09	38	2	2	15	4	15	rs4814877(1),rs11087290(1),rs6046236(1),rs6106115(1),rs2424245(1),rs2424246(1),rs2424248(1),rs17295618(1),rs720436(1),rs733270(1),rs733269(1),rs873628(1),rs6112516(1),rs2236199(1),rs765863(1),rs4239733(1),rs6035411(1),rs6515031(1),rs1535244(1),rs1535245(1),rs6112523(1),rs6075559(1),rs6112525(1),rs6075560(1),rs7272480(1),rs2093108(1),rs6035422(1),rs6112529(1),rs1321350(1),rs10154016(1),rs6112532(1…
11	rs16918503	28989610	2.31e-09	26	1	0	0	1	24	rs11030448(1),rs17599965(1),rs925870(1),rs925869(1),rs1400751(1),rs11604948(1),rs12795950(1),rs10501105(1),rs12804741(1),rs12798809(1),rs12789299(1),rs12801702(1),rs11602285(1),rs17660568(1),rs11606111(1),rs7105713(1),rs2959107(1),rs17603351(1),rs11030512(1),rs11030513(1),rs2939235(1),rs1347253(1),rs4923586(1),rs12788799(1),rs12792701(1)
22	rs4822103	42698574	2.35e-09	17	5	0	2	2	8	rs86669(1),rs4822101(1),rs4822102(1),rs4822104(1),rs6002677(1),rs2227113(1),rs4822111(1),rs1011224(1),rs2294361(1),rs2142831(1),rs7291924(1),rs2072863(1)
7	rs6467900	82125194	2.38e-09	21	3	2	0	0	16	rs2214834(1),rs6977797(1),rs10270837(1),rs1322849(1),rs6965042(1),rs6958323(1),rs7779768(1),rs10215836(1),rs6957160(1),rs6967410(1),rs6947448(1),rs10265872(1),rs6972903(1),rs10262537(1),rs10232216(1),rs1808216(1)
12	rs2058799	16743217	2.39e-09	2	2	0	0	0	0	NONE
2	rs4305233	182042445	2.42e-09	90	24	22	34	2	8	rs10930947(1),rs4618005(1),rs1401128(1),rs4439925(1),rs6433894(1),rs6731186(1),rs7588217(1),rs4077924(1),rs11688120(1),rs6724365(1),rs6752921(1),rs13035276(1),rs4441426(1),rs13002424(1),rs13393709(1),rs13419105(1),rs13339832(1),rs6433906(1),rs17365327(1),rs13410843(1),rs10206405(1),rs9973857(1),rs1371615(1),rs17365432(1),rs17456294(1),rs1371625(1),rs1440048(1),rs17198633(1),rs12616514(1),rs755720…
3	rs9843124	128563551	2.45e-09	39	19	7	0	0	13	rs4548(1),rs4244694(1),rs6775459(1),rs9846589(1),rs4927896(1),rs9840633(1),rs13322981(1),rs9862012(1),rs6768014(1),rs6796031(1),rs9847759(1),rs9810890(1),rs16852884(1)
6	rs3793135	144877840	2.45e-09	77	30	3	0	0	44	rs4401687(1),rs7739143(1),rs4146297(1),rs3811099(1),rs9496995(1),rs2876586(1),rs7749805(1),rs1005974(1),rs3812246(1),rs9497006(1),rs17793810(1),rs12196553(1),rs9390173(1),rs13195928(1),rs6915390(1),rs11155361(1),rs6938409(1),rs6938455(1),rs6918394(1),rs9403565(1),rs1918744(1),rs6908795(1),rs6920388(1),rs13191597(1),rs1830271(1),rs1918746(1),rs1918747(1),rs1918748(1),rs3924656(1),rs3924657(1),rs15…
8	rs4871903	21827833	2.46e-09	50	12	19	10	0	9	rs4872043(1),rs11783175(1),rs11774438(1),rs13254115(1),rs13266920(1),rs17500142(1),rs13282342(1),rs11777307(1),rs11784816(1),rs11135743(1),rs1564305(1),rs9314269(1),rs11785043(1),rs11135763(1),rs7843479(1),rs2291317(1),rs1484162(1),rs2306641(1),rs900778(1)
5	rs12153038	160921475	2.47e-09	13	1	0	1	0	11	rs2964773(1),rs6881515(1),rs11135150(1),rs12153198(1),rs12153421(1),rs17462847(1),rs6882041(1),rs17522604(1),rs17522737(1),rs4921397(1),rs17522861(1),rs2066949(1)
10	rs12779943	27312657	2.48e-09	66	7	10	24	8	17	rs12779247(1),rs12774303(1),rs4749213(1),rs3818634(1),rs7088171(1),rs10829163(1),rs3781099(1),rs3737054(1),rs10829172(1),rs7083768(1),rs10829173(1),rs10829174(1),rs10764669(1),rs10829176(1),rs11015522(1),rs3737056(1),rs12770357(1),rs7086311(1),rs7477806(1),rs3758438(1),rs12782501(1),rs6482596(1),rs12255977(1),rs7901653(1),rs3780920(1),rs7910396(1),rs3780926(1),rs7067696(1),rs2274636(1),rs3824593(…
12	rs17183486	75008850	2.55e-09	73	0	1	12	6	54	rs1461055(1),rs2365917(1),rs6582221(1),rs2886508(1),rs2605330(1),rs2613890(1),rs1157955(1),rs1493805(1),rs1493806(1),rs2934409(1),rs2641467(1),rs2641468(1),rs2605377(1),rs2605376(1),rs2613900(1),rs2613901(1),rs2613903(1),rs2613905(1),rs2641475(1),rs10879806(1),rs7307239(1),rs2641479(1),rs10748259(1),rs7310142(1),rs2199347(1),rs2925225(1),rs2199348(1),rs1389496(1),rs2605327(1),rs3912980(1),rs73012…
11	rs2403254	18325146	2.85e-09	24	2	0	2	5	15	rs7950019(1),rs1993373(1),rs7112278(1),rs7131332(1),rs11024600(1),rs11024605(1),rs11024607(1),rs7128017(1),rs7128146(1),rs11024609(1),rs4366463(1),rs4353250(1),rs11024610(1),rs11024613(1),rs11024614(1),rs11024615(1),rs7122032(1),rs3781944(1),rs2061164(1),rs7113249(1),rs10832920(1),rs3802967(1)
8	rs1394940	110864946	3e-09	27	1	0	0	0	26	rs3102249(1),rs16880060(1),rs1384992(1),rs2129035(1),rs7465500(1),rs10086601(1),rs1505648(1),rs7008754(1),rs975192(1),rs11992349(1),rs10104270(1),rs10092119(1),rs1948890(1),rs7000312(1),rs7834319(1),rs1505649(1),rs1484016(1),rs7845779(1),rs16880109(1),rs1394941(1),rs1505653(1),rs1505652(1),rs1505651(1),rs4735140(1),rs7013309(1),rs11995060(1)
3	rs9817254	56227922	3.06e-09	18	0	1	1	0	16	rs1458069(1),rs9870119(1),rs6792281(1),rs17056416(1),rs7651042(1),rs4974168(1),rs12493083(1),rs2200432(1),rs1564907(1),rs2316480(1),rs7644153(1),rs965961(1),rs12635356(1),rs6445768(1),rs6787104(1),rs1376984(1),rs4974175(1)
12	rs1268747	31659156	3.1e-09	37	13	0	1	3	20	rs3741874(1),rs7297997(1),rs2568887(1),rs2682695(1),rs793148(1),rs793184(1),rs793186(1),rs11051441(1),rs793171(1),rs793174(1),rs11051446(1),rs4930979(1),rs4931507(1),rs7313118(1),rs10743758(1),rs7136476(1),rs11051470(1),rs12826630(1),rs3850971(1),rs3850970(1),rs12827275(1),rs7974004(1),rs2046367(1),rs7979755(1)
14	rs10135304	32473942	3.28e-09	29	2	0	5	3	19	rs8007535(1),rs915071(1),rs972396(1),rs1952966(1),rs4981942(1),rs7144575(1),rs944463(1),rs12437022(1),rs944464(1),rs4981146(1),rs4981147(1),rs17384309(1),rs17384344(1),rs12437061(1),rs17469193(1),rs17384442(1),rs1013252(1),rs9630374(1),rs10162426(1),rs2378955(1),rs9322886(1),rs12588421(1),rs12717214(1),rs12894092(1),rs1279007(1),rs1315995(1),rs1958363(1)
2	rs1260326	27730940	3.31e-09	85	6	7	0	18	54	rs1275501(1),rs1659685(1),rs1395(1),rs1275522(1),rs1275528(1),rs1275530(1),rs1275538(1),rs4665958(1),rs3769143(1),rs6717980(1),rs1141313(1),rs1992291(1),rs1049817(1),rs3739095(1),rs6743819(1),rs10205219(1),rs4665969(1),rs6760828(1),rs7586601(1),rs2280737(1),rs13472(1),rs4582(1),rs1647284(1),rs7594812(1),rs7563162(1),rs1060525(1),rs4665976(1),rs1728922(1),rs6547626(1),rs4665978(1),rs780100(1),rs78…
8	rs6995334	51327229	3.35e-09	166	36	36	26	3	65	rs6991925(1),rs10112818(1),rs2129161(1),rs2015043(1),rs971926(1),rs12541363(1),rs2220157(1),rs2129169(1),rs7010915(1),rs931294(1),rs10112215(1),rs318867(1),rs318913(1),rs1352114(1),rs318915(1),rs167631(1),rs186455(1),rs318918(1),rs318920(1),rs10957739(1),rs9643692(1),rs318923(1),rs2385698(1),rs923058(1),rs7833019(1),rs1484813(1),rs10957741(1),rs12541061(1),rs1484805(1),rs2086888(1),rs1021202(1),r…
4	rs3775282	46321863	3.39e-09	63	13	0	0	19	31	rs16859227(1),rs3822051(1),rs534459(1),rs505474(1),rs532780(1),rs554112(1),rs548583(1),rs526805(1),rs496650(1),rs519270(1),rs543809(1),rs526752(1),rs548956(1),rs551905(1),rs577544(1),rs502038(1),rs530329(1),rs532363(1),rs519869(1),rs483160(1),rs482179(1),rs514733(1),rs13119741(1),rs9291282(1),rs10010493(1),rs2083422(1),rs279873(1),rs279872(1),rs279869(1),rs279864(1),rs450571(1),rs279860(1),rs2798…
2	rs16861304	174039497	3.44e-09	16	5	1	3	0	7	rs11901996(1),rs3769176(1),rs6725795(1),rs6433398(1),rs6753354(1),rs3754741(1),rs3769166(1),rs7559180(1),rs2077755(1),rs10497399(1)
5	rs6869346	120113652	3.47e-09	82	1	4	15	23	39	rs13167682(1),rs10434768(1),rs10434769(1),rs2405964(1),rs1449144(1),rs17429630(1),rs12657360(1),rs17501753(1),rs716815(1),rs4314428(1),rs10519647(1),rs10519648(1),rs7714971(1),rs11948199(1),rs2017378(1),rs1839247(1),rs1839246(1),rs7710640(1),rs7725293(1),rs7729364(1),rs7728749(1),rs1584469(1),rs11749221(1),rs11241566(1),rs2084516(1),rs7730641(1),rs7735871(1),rs6595262(1),rs6861861(1),rs13358641(1…
11	rs7110736	113561054	3.53e-09	31	19	1	1	1	9	rs4938032(1),rs7114195(1),rs1567391(1),rs4936280(1),rs3802856(1),rs7926267(1),rs3851571(1),rs10891590(1),rs17613838(1),rs1176744(1),rs2276302(1)
7	rs6965740	117514840	3.63e-09	42	4	1	2	3	32	rs10233278(1),rs1548460(1),rs10272923(1),rs6950622(1),rs11978052(1),rs6971964(1),rs1024432(1),rs1024433(1),rs1024434(1),rs4730811(1),rs2402273(1),rs7801876(1),rs1468183(1),rs7784849(1),rs2402295(1),rs10226992(1),rs7793280(1),rs2051750(1),rs10487381(1),rs6968012(1),rs12706166(1),rs10232053(1),rs10278862(1),rs10235515(1),rs13226962(1),rs1548458(1),rs10241640(1),rs10215788(1),rs763890(1),rs10258900(…
2	rs2063962	169042663	3.68e-09	42	3	8	7	9	15	rs4668014(1),rs4667554(1),rs16854696(1),rs4667556(1),rs4473354(1),rs12692874(1),rs6720684(1),rs1816977(1),rs7603464(1),rs1517334(1),rs16854905(1),rs3754775(1),rs13023246(1),rs13022764(1),rs13023468(1),rs10497337(1),rs6740826(1),rs4667569(1),rs6749447(1),rs6734514(1),rs4668044(1),rs2063959(1),rs883406(1),rs13420405(1),rs16855079(1),rs10202854(1),rs10930310(1),rs10930311(1),rs4613238(1),rs2271741(1…
8	rs10095390	10815515	3.75e-09	30	0	3	7	4	16	rs718742(1),rs9329231(1),rs4840517(1),rs11993903(1),rs11250080(1),rs11784331(1),rs11784061(1),rs13248287(1),rs7813037(1),rs13279922(1),rs6992103(1),rs11779116(1),rs4841463(1),rs4841464(1),rs7008460(1),rs4623373(1),rs6982927(1),rs10096624(1),rs10086872(1),rs4645525(1),rs4413733(1),rs4265148(1),rs4623374(1),rs6601540(1),rs7845493(1),rs7008855(1),rs4310164(1)
12	rs10783446	51881725	3.79e-09	15	0	1	1	2	11	rs10876168(1),rs7300192(1),rs2359603(1),rs12366428(1),rs4761973(1),rs4761975(1),rs2102376(1),rs10783448(1),rs1055492(1),rs10783451(1),rs10783452(1),rs3896351(1),rs7305599(1),rs10783453(1)
9	rs4878435	30551992	3.89e-09	46	0	1	2	11	32	rs10969692(1),rs1333004(1),rs10757964(1),rs10757966(1),rs12380545(1),rs7018745(1),rs10813281(1),rs2361131(1),rs10813284(1),rs10813298(1),rs10757977(1),rs10481581(1),rs9792561(1),rs10969754(1),rs4406498(1),rs1109935(1),rs1104787(1),rs10813314(1),rs10757981(1),rs10813317(1),rs4498633(1),rs10813320(1),rs10969796(1),rs10813325(1),rs10813330(1),rs1857563(1),rs7037162(1),rs7873011(1),rs7470886(1),rs109…
9	rs2841338	128189302	3.93e-09	8	2	0	2	0	4	rs10986569(1),rs359575(1),rs359588(1),rs605437(1),rs7045552(1),rs7868608(1)
3	rs9829630	86693504	3.97e-09	138	47	5	0	3	83	rs6774344(1),rs1512920(1),rs6782013(1),rs2324885(1),rs4688893(1),rs1355686(1),rs6801738(1),rs12488883(1),rs1996070(1),rs11127935(1),rs7639430(1),rs11707281(1),rs12495441(1),rs1170214(1),rs979471(1),rs13059931(1),rs10511063(1),rs9813778(1),rs9857525(1),rs13077222(1),rs9870046(1),rs13068252(1),rs1389715(1),rs9850323(1),rs9813096(1),rs9810116(1),rs6796145(1),rs6783291(1),rs1908608(1),rs1908607(1),rs…
2	rs1075726	23412686	4.18e-09	6	0	0	1	3	2	rs1562752(1),rs4665556(1),rs10194644(1),rs10197888(1),rs896020(1),rs1449984(1)
18	rs1377242	53134556	4.25e-09	11	0	0	1	5	5	rs17594301(1),rs4801156(1),rs2958172(1),rs17089826(1),rs12326678(1),rs1319637(1),rs658977(1),rs587136(1),rs8098032(1),rs12456652(1),rs12455881(1)
5	rs6555203	3415406	4.36e-09	41	6	6	3	1	25	rs402272(1),rs11741592(1),rs641342(1),rs4866444(1),rs2652471(1),rs2652470(1),rs434797(1),rs11748433(1),rs7703631(1),rs429087(1),rs449880(1),rs423072(1),rs103722(1),rs2652468(1),rs2652467(1),rs13170639(1),rs372157(1),rs418502(1),rs364458(1),rs11741174(1),rs419252(1),rs39973(1),rs17683976(1),rs11742901(1),rs412102(1),rs11744645(1),rs413597(1),rs251444(1),rs10512699(1)
6	rs9482508	98685769	4.54e-09	76	6	0	4	1	65	rs1933722(1),rs9398586(1),rs1338556(1),rs1933718(1),rs4476839(1),rs9374991(1),rs9372649(1),rs9387948(1),rs12525015(1),rs12527158(1),rs9375028(1),rs9375029(1),rs9375030(1),rs9387954(1),rs9398636(1),rs4601135(1),rs4644075(1),rs9385205(1),rs9385223(1),rs4131042(1),rs12524696(1),rs17058149(1),rs9375098(1),rs9401491(1),rs4307179(1),rs17058157(1),rs4499937(1),rs9375110(1),rs9388073(1),rs4466255(1),rs94…
3	rs1505801	131907065	4.65e-09	105	23	9	32	8	33	rs1521282(1),rs2369372(1),rs16838754(1),rs1851218(1),rs7621728(1),rs7621996(1),rs939315(1),rs9827646(1),rs1533748(1),rs16838776(1),rs9681094(1),rs17399853(1),rs3914906(1),rs13059030(1),rs6795246(1),rs11720059(1),rs7626343(1),rs12631837(1),rs1505803(1),rs1395006(1),rs7630827(1),rs1505798(1),rs1847831(1),rs1587947(1),rs2062963(1),rs9843722(1),rs9863736(1),rs7621328(1),rs6802179(1),rs1505820(1),rs68…
13	rs4884400	53879062	4.66e-09	81	29	18	17	13	4	rs8181889(1),rs2246208(1),rs2806971(1),rs2759700(1),rs2181389(1),rs1322938(1),rs1885767(1),rs2759716(1),rs1322962(1),rs2806939(1),rs2806940(1),rs1923772(1),rs1322961(1),rs1322960(1),rs2806943(1),rs1555552(1),rs7994915(1),rs1322957(1),rs2759714(1),rs2759712(1),rs1322955(1),rs2806947(1),rs1322951(1),rs1322949(1),rs7984963(1),rs4555040(1),rs8001960(1),rs7992723(1),rs9536407(1),rs1470343(1),rs1899717…
12	rs17118409	56630764	4.92e-09	25	0	0	0	0	25	rs17118403(1),rs2371454(1),rs871130(1),rs17118431(1),rs744051(1),rs17118439(1),rs773652(1),rs2306693(1),rs2306694(1),rs1274493(1),rs2695789(1),rs10876882(1),rs2629447(1),rs703830(1),rs773665(1),rs2291361(1),rs11171803(1),rs2695782(1),rs2643626(1),rs2371494(1),rs11171806(1),rs2066808(1),rs2020854(1),rs2066819(1),rs2066818(1)
11	rs238910	113986879	4.95e-09	16	3	2	0	0	11	rs238924(1),rs238914(1),rs238913(1),rs238912(1),rs238911(1),rs1630468(1),rs926075(1),rs909167(1),rs909168(1),rs1810382(1),rs4936289(1)
8	rs1562612	59817068	5.01e-09	26	9	0	0	13	4	rs1463142(1),rs1463141(1),rs17231995(1),rs721011(1),rs4738738(1),rs1375192(1),rs4527857(1),rs4527858(1),rs2197803(1),rs6983623(1),rs6983967(1),rs1900774(1),rs1900773(1),rs7012303(1),rs17299611(1),rs1448547(1),rs3780001(1)
7	rs6944877	1952582	5.01e-09	46	15	2	3	4	22	rs4236271(1),rs10233560(1),rs6954521(1),rs6978048(1),rs6954673(1),rs6957894(1),rs4719318(1),rs10260585(1),rs4721121(1),rs4721134(1),rs4721135(1),rs10275045(1),rs10244946(1),rs6967442(1),rs4721184(1),rs4721185(1),rs2056480(1),rs7804190(1),rs4721295(1),rs3778969(1),rs1476887(1),rs731140(1),rs3800908(1),rs3778977(1),rs4719443(1),rs1860832(1),rs3800913(1),rs10226475(1),rs4719457(1)
9	rs3860950	81538492	5.36e-09	11	2	0	0	0	9	rs10120590(1),rs3843927(1),rs7874303(1),rs10119969(1),rs7021340(1),rs11137956(1),rs10780272(1),rs1371013(1),rs10780276(1)
6	rs4275056	40628853	5.47e-09	6	0	0	1	0	5	rs11967079(1),rs16893884(1),rs16893901(1),rs7775209(1),rs9394718(1),rs9471400(1)
7	rs3843540	99126640	5.56e-09	82	3	6	20	17	36	rs11972017(1),rs10953286(1),rs733991(1),rs6957987(1),rs12113440(1),rs12112936(1),rs6973408(1),rs17161662(1),rs12538893(1),rs17161669(1),rs3801288(1),rs17161692(1),rs2286162(1),rs10270917(1),rs10258757(1),rs6955490(1),rs11762273(1),rs4729532(1),rs11978089(1),rs10243678(1),rs6943920(1),rs917154(1),rs10271049(1),rs7794705(1),rs10215854(1),rs883403(1),rs2280600(1),rs3779354(1),rs12535424(1),rs1980307…
1	rs2901785	174104743	5.71e-09	182	49	11	71	27	24	rs3791020(1),rs9425756(1),rs2281486(1),rs16846439(1),rs2295366(1),rs2067079(1),rs1951625(1),rs1322774(1),rs9286895(1),rs4652283(1),rs1322777(1),rs4652328(1),rs1322780(1),rs6691053(1),rs9425436(1),rs2227612(1),rs5877(1),rs2227588(1),rs9425780(1),rs767053(1),rs1407596(1),rs6703547(1),rs10912702(1),rs6695887(1),rs1407597(1),rs13375205(1),rs1884994(1),rs12566842(1),rs12072602(1),rs1321637(1),rs120717…
1	rs17570390	73938246	5.74e-09	12	0	0	0	0	12	rs782228(1),rs17615090(1),rs2692863(1),rs2841188(1),rs2692864(1),rs2422286(1),rs2764508(1),rs2841187(1),rs2841186(1),rs6674768(1),rs4650154(1),rs17615698(1)
1	rs2301767	44773839	5.88e-09	23	2	5	7	3	6	rs12124324(1),rs7551484(1),rs2025615(1),rs12743696(1),rs6429648(1),rs7527487(1),rs4660776(1),rs2108304(1),rs6662888(1),rs2429060(1),rs6675129(1),rs6429535(1),rs12744636(1),rs161725(1),rs4356094(1),rs1989951(1)
9	rs10818693	101026356	5.9e-09	40	3	10	0	0	27	rs10123643(1),rs1573025(1),rs4743187(1),rs12237988(1),rs1935389(1),rs879368(1),rs4379551(1),rs10818640(1),rs10760218(1),rs10818662(1),rs10818672(1),rs10818678(1),rs10124977(1),rs10985642(1),rs10760233(1),rs7869364(1),rs2304389(1),rs2304390(1),rs7856392(1),rs7867465(1),rs7867834(1),rs10985808(1),rs10985817(1),rs10985819(1),rs3824451(1),rs3780445(1),rs10985825(1)
8	rs2979213	8188544	5.95e-09	16	0	3	0	5	8	rs2955590(1),rs2979210(1),rs2945901(1),rs1850726(1),rs2945913(1),rs17150353(1),rs7006376(1),rs724266(1),rs11996133(1),rs12680219(1),rs12680238(1),rs17669947(1),rs17607190(1)
21	rs2837405	41429710	6.22e-09	19	0	0	7	0	12	rs2837383(1),rs2837384(1),rs2860103(1),rs2837393(1),rs8133326(1),rs2837395(1),rs2837396(1),rs2222999(1),rs2837398(1),rs2837399(1),rs2837403(1),rs2837409(1),rs1882780(1),rs2837410(1),rs12627033(1),rs2065315(1),rs2837433(1),rs2837434(1),rs2837440(1)
1	rs437021	61738270	6.29e-09	6	1	1	0	2	2	rs332824(1),rs332822(1),rs332819(1),rs446952(1)
4	rs12512177	29500646	6.61e-09	60	24	12	2	11	11	rs6817648(1),rs7678814(1),rs7667523(1),rs1980023(1),rs6812764(1),rs6813331(1),rs1816453(1),rs7666825(1),rs12504368(1),rs12331993(1),rs9991320(1),rs10002247(1),rs4692397(1),rs12511902(1),rs17663311(1),rs1441689(1),rs16881950(1),rs1441667(1),rs13142438(1),rs6831884(1),rs10002254(1),rs10517177(1),rs1530275(1),rs716245(1)
10	rs13013	75562161	6.68e-09	36	23	0	0	0	13	rs11000760(1),rs7076585(1),rs10762563(1),rs2633310(1),rs2633311(1),rs2675662(1),rs2459446(1),rs2250140(1),rs2664282(1),rs2688614(1),rs2459449(1),rs2227551(1),rs2227564(1)
20	rs6061186	30731740	6.69e-09	45	5	0	1	1	38	rs6089170(1),rs926687(1),rs926688(1),rs980368(1),rs6121337(1),rs4911546(1),rs2235898(1),rs2235899(1),rs2235900(1),rs2235902(1),rs4911198(1),rs2281362(1),rs6061185(1),rs4911547(1),rs4911548(1),rs4911549(1),rs6142622(1),rs4911550(1),rs6061195(1),rs6061198(1),rs14316(1),rs1412997(1),rs1412998(1),rs2208131(1),rs6141294(1),rs2295454(1),rs6141295(1),rs4911223(1),rs6141302(1),rs4911229(1),rs3818190(1),r…
6	rs7763553	113464570	6.93e-09	29	2	3	4	2	18	rs12525741(1),rs7770043(1),rs9320430(1),rs6568768(1),rs6568769(1),rs6903504(1),rs2473940(1),rs961755(1),rs2473937(1),rs2473935(1),rs2473981(1),rs2473978(1),rs12528438(1),rs2502400(1),rs12530265(1),rs1321025(1),rs1321022(1),rs9488095(1),rs6911781(1),rs9400599(1),rs774558(1),rs9488105(1),rs4945491(1),rs4945931(1)
19	rs973579	49241976	7e-09	7	0	0	1	0	6	rs281377(1),rs485186(1),rs507766(1),rs504963(1),rs503279(1),rs281380(1),rs281408(1)
7	rs4727805	114401123	7.57e-09	26	0	1	0	1	24	rs13222712(1),rs12705986(1),rs2045293(1),rs10500039(1),rs13312596(1),rs1378767(1),rs12705988(1),rs13233601(1),rs1869839(1),rs1378770(1),rs6973473(1),rs1979089(1),rs613499(1),rs601926(1),rs666187(1),rs776460(1),rs2124474(1),rs17292989(1),rs684253(1),rs681914(1),rs623144(1),rs624667(1),rs4730645(1),rs12667929(1),rs4265116(1)
14	rs729395	94171859	7.64e-09	58	17	24	15	1	1	rs7146730(1),rs9919907(1),rs11160114(1),rs10142345(1),rs4905064(1),rs2102232(1),rs1015032(1),rs9323891(1),rs1566805(1),rs10130966(1),rs12436290(1),rs4905073(1),rs10129979(1),rs17094893(1),rs7151505(1),rs4905081(1),rs2148567(1)
4	rs10021187	28239303	7.9e-09	52	20	0	0	0	32	rs10009033(1),rs4287996(1),rs4234993(1),rs4585287(1),rs1497719(1),rs7667232(1),rs1497721(1),rs7657195(1),rs7679421(1),rs4692296(1),rs4692297(1),rs4692298(1),rs16880374(1),rs10034399(1),rs10024127(1),rs7658653(1),rs6448568(1),rs7660232(1),rs1497693(1),rs4452420(1),rs12648254(1),rs1497690(1),rs10033421(1),rs4467550(1),rs2309738(1),rs2871323(1),rs2309739(1),rs2132971(1),rs2173279(1),rs9291517(1),rs1…
10	rs2175207	87357738	7.97e-09	19	1	0	5	1	12	rs10788458(1),rs4934113(1),rs4934115(1),rs2175202(1),rs2136591(1),rs12243608(1),rs2457451(1),rs2664402(1),rs10887504(1),rs2136590(1),rs12784086(1),rs17306695(1),rs7907900(1),rs1876883(1),rs1912276(1),rs10509523(1),rs17307596(1),rs7919376(1)
10	rs10822179	65280164	8.02e-09	124	12	0	4	3	105	rs1155233(1),rs11813180(1),rs12412372(1),rs10761703(1),rs10761707(1),rs10995439(1),rs10761708(1),rs10995440(1),rs10995441(1),rs3211105(1),rs4379723(1),rs12413730(1),rs1579045(1),rs11819167(1),rs10822148(1),rs1904295(1),rs10761728(1),rs7082090(1),rs9414780(1),rs6479891(1),rs7081614(1),rs4454603(1),rs10761730(1),rs10822150(1),rs9415680(1),rs7909555(1),rs9415682(1),rs10761733(1),rs10740110(1),rs1099…
5	rs2898278	59734630	8.09e-09	46	3	25	6	3	9	rs13186687(1),rs6889641(1),rs4513649(1),rs7709269(1),rs10939842(1),rs10939844(1),rs6860277(1),rs6894943(1),rs10045433(1),rs10471256(1),rs446883(1),rs7719095(1),rs11948687(1),rs12188950(1),rs11960912(1),rs11957512(1),rs17422192(1),rs7723653(1)
2	rs2465526	51849371	8.36e-09	117	9	7	16	16	69	rs9989837(1),rs12465174(1),rs10165311(1),rs10165525(1),rs11562997(1),rs13386874(1),rs13387005(1),rs11563152(1),rs12616608(1),rs13405904(1),rs11563150(1),rs10190317(1),rs10199009(1),rs9309214(1),rs2354379(1),rs2883426(1),rs2354381(1),rs17864557(1),rs6715597(1),rs6723510(1),rs6708550(1),rs4538243(1),rs17862725(1),rs2354384(1),rs1119247(1),rs1606979(1),rs2675023(1),rs2048843(1),rs2944336(1),rs428780…
3	rs6770989	84652227	8.38e-09	32	5	4	9	10	4	rs1986098(1),rs17424343(1),rs1401391(1),rs17491161(1),rs12632187(1),rs1453724(1),rs12635398(1),rs12634157(1),rs10470566(1),rs9882835(1),rs4362730(1),rs11710452(1),rs11709966(1),rs7611594(1),rs12486306(1),rs985672(1),rs1580448(1),rs1473461(1),rs11709466(1),rs11706386(1),rs11714049(1),rs12491759(1),rs6810190(1)
16	rs889811	12505469	8.45e-09	70	2	3	2	16	47	rs830715(1),rs11639640(1),rs13335852(1),rs11644788(1),rs905950(1),rs9630612(1),rs12445263(1),rs17697005(1),rs17764604(1),rs7191442(1),rs4780417(1),rs4780418(1),rs6498274(1),rs7189386(1),rs7194718(1),rs12445569(1),rs7204333(1),rs7194981(1),rs11075059(1),rs12148953(1),rs869289(1),rs868773(1),rs1995587(1),rs7193318(1),rs209845(1),rs2856770(1),rs209836(1),rs209835(1),rs209834(1),rs289673(1),rs4781205…
13	rs4483714	100756339	8.57e-09	11	7	1	3	0	0	rs2184970(1),rs1112044(1),rs675342(1)
20	rs4809352	62439108	8.86e-09	28	2	0	3	2	21	rs6011040(1),rs2315007(1),rs2315008(1),rs4809330(1),rs6011066(1),rs4809334(1),rs12481497(1),rs11696871(1),rs11697497(1),rs6010640(1),rs6122172(1),rs12710318(1),rs755017(1),rs2281929(1),rs4538263(1),rs6010655(1),rs6010659(1),rs6010669(1),rs4809358(1),rs751861(1),rs751860(1),rs6011152(1),rs11700372(1),rs6011154(1),rs6011155(1),rs4809362(1)
5	rs12522181	167426029	9.32e-09	12	4	1	0	2	5	rs2546951(1),rs17069579(1),rs11134485(1),rs17069620(1),rs17069633(1),rs11952245(1),rs17069705(1)
5	rs6861341	138436816	9.6e-09	6	0	0	0	0	6	rs17207681(1),rs6873733(1),rs13181793(1),rs11743534(1),rs7704790(1),rs6887866(1)
16	rs7192060	53692199	9.67e-09	31	0	1	0	2	28	rs2388230(1),rs4423416(1),rs9925714(1),rs8057965(1),rs16952347(1),rs6499631(1),rs1946155(1),rs3760008(1),rs1477096(1),rs1477097(1),rs8047089(1),rs2241179(1),rs9929804(1),rs8050354(1),rs13329973(1),rs9935278(1),rs1344504(1),rs1077352(1),rs2111119(1),rs7203525(1),rs9928935(1),rs8056869(1),rs9934800(1),rs9925121(1),rs4467070(1),rs5005161(1),rs13334070(1),rs12447481(1),rs12445162(1),rs11861870(1)
10	rs4917766	99097191	9.71e-09	84	32	13	4	5	30	rs4919083(1),rs877825(1),rs902466(1),rs701810(1),rs701814(1),rs1687369(1),rs701816(1),rs1147600(1),rs953097(1),rs3814164(1),rs10748691(1),rs793517(1),rs793516(1),rs793515(1),rs1468069(1),rs2297987(1),rs946981(1),rs2065861(1),rs13439(1),rs10882883(1),rs7074678(1),rs3740522(1),rs793524(1),rs10786321(1),rs10736115(1),rs793520(1),rs10882889(1),rs1253401(1),rs10882891(1),rs10786327(1),rs4919087(1),rs3…
6	rs7452676	37624447	9.81e-09	33	1	1	11	1	19	rs7748388(1),rs9462340(1),rs4714089(1),rs9462343(1),rs3846874(1),rs13204070(1),rs7452692(1),rs3846876(1),rs4236056(1),rs6930085(1),rs10755699(1),rs13198513(1),rs13212859(1),rs2273110(1),rs3846877(1),rs6922589(1),rs3846879(1),rs4236057(1),rs4711509(1),rs6911875(1),rs10807187(1),rs12195277(1),rs3857571(1),rs1883899(1),rs1883900(1),rs9394447(1),rs10947690(1),rs6925749(1),rs4992764(1),rs10947692(1),r…
10	rs10905648	10030629	9.81e-09	45	11	0	0	1	33	rs7072096(1),rs7897236(1),rs7078690(1),rs7078857(1),rs2895011(1),rs7915573(1),rs7912450(1),rs11256401(1),rs11256403(1),rs7894837(1),rs11256406(1),rs12569898(1),rs12248055(1),rs11598522(1),rs10905646(1),rs1591894(1),rs7915729(1),rs1591890(1),rs1591892(1),rs1339684(1),rs2398004(1),rs4578289(1),rs6602386(1),rs11256431(1),rs7092291(1),rs1876066(1),rs7096655(1),rs7900942(1),rs12570537(1),rs7914363(1),…
3	rs7651078	43499018	9.85e-09	53	2	9	16	6	20	rs9861529(1),rs7639584(1),rs9311335(1),rs13074235(1),rs1320158(1),rs2372356(1),rs4419357(1),rs9852399(1),rs4260403(1),rs1573931(1),rs11715896(1),rs17473616(1),rs9311340(1),rs1351631(1),rs9815196(1),rs1975997(1),rs9830697(1),rs6802567(1),rs1564434(1),rs10510737(1),rs6772068(1),rs17474028(1),rs737516(1),rs1384435(1),rs17075754(1),rs11130004(1),rs6763411(1),rs12638282(1),rs17409162(1),rs1842805(1),r…
4	rs9316	83344744	9.91e-09	3	3	0	0	0	0	NONE
16	rs17769886	24701728	1.01e-08	8	0	0	0	5	3	rs11863676(1),rs9935064(1),rs9935217(1),rs7184410(1),rs7184750(1),rs7185291(1),rs8056132(1),rs17177078(1)
2	rs17187538	157021763	1.01e-08	36	23	0	0	0	13	rs1526903(1),rs17244395(1),rs17184889(1),rs17244514(1),rs17185023(1),rs17244660(1),rs17185142(1),rs1113061(1),rs17247108(1),rs17188434(1),rs13410664(1),rs4369815(1),rs17195587(1)
13	rs6563113	80064135	1.02e-08	99	7	4	15	6	67	rs7982730(1),rs9545033(1),rs9574384(1),rs881143(1),rs9635022(1),rs4885621(1),rs9530880(1),rs9601208(1),rs9318621(1),rs7322167(1),rs7317416(1),rs1408658(1),rs1752649(1),rs12871015(1),rs9545076(1),rs7332367(1),rs7981067(1),rs7996652(1),rs9574409(1),rs9565489(1),rs3742117(1),rs7319320(1),rs7987769(1),rs2274555(1),rs3752994(1),rs9318623(1),rs7327386(1),rs7998837(1),rs9318625(1),rs9530901(1),rs2182873…
1	rs10754318	88837917	1.03e-08	65	10	23	4	1	27	rs12755168(1),rs1336573(1),rs1336576(1),rs10923043(1),rs6428641(1),rs519399(1),rs6698727(1),rs4656024(1),rs472473(1),rs10923053(1),rs6679982(1),rs481055(1),rs517832(1),rs6692873(1),rs566685(1),rs608410(1),rs566606(1),rs683815(1),rs589824(1),rs687790(1),rs499081(1),rs127384(1),rs665404(1),rs4656036(1),rs766353(1),rs926795(1),rs1980518(1),rs1156983(1),rs12141716(1),rs994452(1),rs693691(1),rs1713044…
2	rs11124260	31698342	1.06e-08	94	66	0	3	7	18	rs17011356(1),rs743163(1),rs13387204(1),rs2281550(1),rs1366817(1),rs2281547(1),rs206847(1),rs206849(1),rs206854(1),rs2365772(1),rs17545483(1),rs17604831(1),rs766273(1),rs17545760(1),rs4952251(1),rs1006070(1),rs761925(1),rs1033688(1),rs1033689(1),rs7602067(1),rs1884723(1),rs212703(1),rs177083(1),rs212704(1),rs212706(1),rs212707(1),rs212708(1),rs212713(1)
5	rs7704770	159487953	1.11e-08	12	11	1	0	0	0	NONE
13	rs7334317	58324496	1.12e-08	116	37	9	4	11	55	rs6561938(1),rs7326551(1),rs7333401(1),rs4296159(1),rs9537782(1),rs9537784(1),rs4379958(1),rs9563527(1),rs17262885(1),rs17263198(1),rs9527691(1),rs17178205(1),rs2151825(1),rs9537796(1),rs9537797(1),rs1113315(1),rs7324317(1),rs6561943(1),rs9537804(1),rs1334299(1),rs9537818(1),rs2320925(1),rs12428841(1),rs9527706(1),rs9537821(1),rs1041646(1),rs1334290(1),rs9527715(1),rs9527716(1),rs12430866(1),rs11…
1	rs4949398	31892847	1.17e-08	141	13	2	23	21	82	rs2066163(1),rs6425715(1),rs6677966(1),rs946887(1),rs2377717(1),rs4949358(1),rs7549197(1),rs4949198(1),rs10798827(1),rs2889710(1),rs10737355(1),rs10753244(1),rs10798828(1),rs12033303(1),rs10914327(1),rs10798831(1),rs10914328(1),rs7543900(1),rs7544003(1),rs6703593(1),rs2050815(1),rs6672915(1),rs10914330(1),rs6425717(1),rs7546080(1),rs2377732(1),rs881882(1),rs2377731(1),rs2889713(1),rs2377730(1),rs…
12	rs6582578	46335124	1.24e-08	63	16	18	1	7	21	rs10880836(1),rs11183179(1),rs11183181(1),rs3759404(1),rs2160983(1),rs17774089(1),rs12367059(1),rs7485654(1),rs10880851(1),rs10880852(1),rs4768659(1),rs4768660(1),rs2059405(1),rs17712809(1),rs183646(1),rs35123(1),rs1291625(1),rs7961085(1),rs1366024(1),rs724909(1),rs7309711(1),rs1291628(1),rs7306229(1),rs11183243(1),rs997307(1),rs4768671(1),rs1012642(1),rs10880875(1),rs764192(1)
22	rs1473811	45339473	1.25e-08	16	10	0	0	0	6	rs736490(1),rs16993195(1),rs2024708(1),rs11703912(1),rs8137390(1),rs16993202(1)
2	rs12989910	23604612	1.27e-08	39	0	3	6	0	30	rs11674807(1),rs6748625(1),rs6759333(1),rs12992197(1),rs4665586(1),rs4665206(1),rs7604264(1),rs6756996(1),rs893425(1),rs13024346(1),rs6725470(1),rs6740542(1),rs10495742(1),rs11682636(1),rs2016432(1),rs11678409(1),rs12995589(1),rs13014571(1),rs12990853(1),rs10495743(1),rs13027874(1),rs4665590(1),rs4665208(1),rs4665591(1),rs1561322(1),rs13397583(1),rs12997821(1),rs6742888(1),rs6756971(1),rs4574070(…
1	rs6671069	197913101	1.28e-08	13	0	1	3	8	1	rs4147202(1),rs12024850(1),rs11577674(1),rs12046958(1),rs12750987(1),rs16842147(1),rs16842152(1),rs17644383(1),rs4915255(1),rs12727777(1),rs10922333(1),rs1909507(1)
6	rs9321394	99600083	1.28e-08	31	11	2	0	1	17	rs9375909(1),rs726488(1),rs2388833(1),rs2388834(1),rs2892615(1),rs761637(1),rs761638(1),rs6922184(1),rs6940049(1),rs6569850(1),rs6938641(1),rs9375932(1),rs17771773(1),rs9385636(1),rs2645352(1),rs1003243(1),rs2645353(1),rs1496967(1)
17	rs745571	77781387	1.29e-08	3	2	0	0	0	1	rs745570(1)
12	rs2235218	120888619	1.3e-08	19	5	6	1	0	7	rs2235217(1),rs9040(1),rs1050187(1),rs4767902(1),rs3916065(1),rs9788155(1),rs10849757(1),rs637799(1)
6	rs7740499	170111601	1.32e-08	72	1	29	11	0	31	rs760950(1),rs4716333(1),rs4716366(1),rs2294497(1),rs9295006(1),rs726792(1),rs2867148(1),rs2050060(1),rs9371118(1),rs6932553(1),rs9295018(1),rs4716369(1),rs9478000(1),rs9478086(1),rs7762260(1),rs2274953(1),rs4716391(1),rs2011670(1),rs6459659(1),rs12525275(1),rs7761459(1),rs7746901(1),rs4145078(1),rs4716397(1),rs4716398(1),rs4716345(1),rs4716399(1),rs4716346(1),rs7765561(1),rs6459664(1),rs7739088(…
2	rs17753018	64292925	1.35e-08	31	7	3	13	5	3	rs1568174(1),rs6546003(1),rs12478262(1),rs2901581(1),rs4671501(1),rs12470121(1),rs11687234(1),rs4671506(1),rs13422170(1),rs13409031(1),rs6731136(1),rs1022351(1),rs10171190(1),rs10209490(1),rs1022353(1),rs10164844(1),rs2421891(1),rs4671061(1),rs6708611(1),rs17752868(1),rs17701941(1)
4	rs7668701	30570873	1.38e-08	42	7	0	11	8	16	rs17763421(1),rs954275(1),rs7682498(1),rs7682876(1),rs2137259(1),rs2137258(1),rs7687988(1),rs7668940(1),rs7682155(1),rs7687443(1),rs6829115(1),rs17765570(1),rs13143840(1),rs13133508(1),rs1486779(1),rs720394(1),rs13115431(1),rs13105504(1),rs12511839(1),rs12501368(1),rs13111851(1),rs7694762(1),rs9995126(1),rs10017286(1),rs13146789(1),rs13109089(1),rs9992273(1),rs13114054(1),rs13114480(1),rs4692481(…
5	rs11745886	51919999	1.39e-08	85	31	1	4	2	47	rs13169187(1),rs9647518(1),rs12520268(1),rs13165563(1),rs13166251(1),rs13166434(1),rs13173579(1),rs12153537(1),rs13176389(1),rs7721698(1),rs13180063(1),rs12188418(1),rs13163254(1),rs10512969(1),rs830868(1),rs616024(1),rs7734874(1),rs351953(1),rs2084659(1),rs16879988(1),rs350425(1),rs350424(1),rs351966(1),rs1823538(1),rs350413(1),rs660801(1),rs181271(1),rs10461560(1),rs351957(1),rs10512980(1),rs35…
12	rs12820589	31797673	1.39e-08	23	1	1	1	1	19	rs2049116(1),rs4483684(1),rs10843977(1),rs4931533(1),rs7962168(1),rs2888753(1),rs2374165(1),rs10843980(1),rs10843984(1),rs10843985(1),rs7313475(1),rs7314164(1),rs7299690(1),rs10843986(1),rs10843987(1),rs11051505(1),rs11051506(1),rs11051507(1),rs11051508(1),rs12813290(1),rs6487998(1)
5	rs12655051	163106434	1.5e-08	7	1	0	2	2	2	rs6886066(1),rs6556682(1),rs12519058(1),rs424217(1),rs493108(1),rs1897707(1)
2	rs2278883	173996917	1.51e-08	15	0	0	2	2	11	rs12987269(1),rs12463612(1),rs13022800(1),rs12986917(1),rs1809139(1),rs13029949(1),rs1866634(1),rs734993(1),rs746179(1),rs13032010(1),rs1816717(1),rs935007(1),rs13034748(1),rs13035366(1),rs3769165(1)
8	rs9329191	9216584	1.52e-08	11	0	0	0	1	10	rs17149826(1),rs12545922(1),rs10106967(1),rs7018002(1),rs9329192(1),rs17661680(1),rs17718351(1),rs10099831(1),rs17661793(1),rs17718436(1),rs17661895(1)
6	rs2859348	28359170	1.55e-08	67	54	2	4	2	5	rs9379968(1),rs6914521(1),rs7771953(1),rs9366689(1),rs2893911(1),rs11756111(1),rs1150720(1),rs1150719(1),rs916403(1),rs2531806(1),rs1015811(1)
9	rs11137877	81474298	1.59e-08	1	0	0	1	0	0	rs10125520(1)
13	rs9581874	28086956	1.59e-08	39	4	0	1	3	31	rs17806464(1),rs9581843(1),rs9581846(1),rs7988412(1),rs1885989(1),rs1885988(1),rs9581853(1),rs9319366(1),rs4771122(1),rs12584061(1),rs12585587(1),rs9579084(1),rs17808758(1),rs10467687(1),rs9319368(1),rs9319370(1),rs9319371(1),rs9319372(1),rs9319373(1),rs9319374(1),rs17753121(1),rs7336332(1),rs9579087(1),rs9581866(1),rs9581868(1),rs9652091(1),rs927578(1),rs927579(1),rs17753763(1),rs9579094(1),rs95…
6	rs489364	11500699	1.65e-08	61	7	0	6	4	44	rs4301302(1),rs4076156(1),rs4713525(1),rs4713527(1),rs3823449(1),rs1568614(1),rs9380307(1),rs9394097(1),rs10947294(1),rs12209878(1),rs10947300(1),rs12189776(1),rs12210076(1),rs10947305(1),rs17764876(1),rs10456409(1),rs17697296(1),rs12215719(1),rs9469217(1),rs12526369(1),rs12201652(1),rs10947330(1),rs10498678(1),rs12192728(1),rs17697372(1),rs12524640(1),rs821543(1),rs12201467(1),rs12189605(1),rs10…
15	rs4887111	74028285	1.65e-08	7	1	1	4	0	1	rs1481088(1),rs922687(1),rs8037836(1),rs1481089(1),rs7162423(1)
11	rs10837926	42796305	1.66e-08	29	2	0	2	1	24	rs7930170(1),rs7930627(1),rs12361731(1),rs12286647(1),rs10837924(1),rs7928165(1),rs4482015(1),rs10837929(1),rs10837930(1),rs4408298(1),rs4581433(1),rs7925198(1),rs11037075(1),rs11037076(1),rs7932106(1),rs12362350(1),rs4262714(1),rs12804473(1),rs7939837(1),rs7926852(1),rs7930420(1),rs4391804(1),rs11037086(1),rs12805785(1),rs4472923(1),rs7125821(1),rs7129068(1)
8	rs7006609	84705236	1.8e-08	86	17	41	9	9	10	rs10105066(1),rs9298407(1),rs1348907(1),rs7813153(1),rs7818253(1),rs7818289(1),rs4272373(1),rs4400389(1),rs7831925(1),rs13251395(1),rs4577955(1),rs7003433(1),rs13257012(1),rs10958176(1),rs4739974(1),rs6473474(1),rs6996066(1),rs11992865(1),rs7010644(1),rs13269017(1),rs4739979(1),rs4255135(1),rs10095306(1),rs11781410(1),rs11785655(1),rs10958184(1),rs12682602(1),rs12547395(1)
22	rs9608719	29404651	1.81e-08	49	1	1	10	7	30	rs695318(1),rs5752797(1),rs5762795(1),rs6005881(1),rs5762799(1),rs2097461(1),rs2239815(1),rs3788409(1),rs5997408(1),rs763073(1),rs5762824(1),rs5752809(1),rs5762861(1),rs5762862(1),rs13058031(1),rs7287918(1),rs5762881(1),rs5762882(1),rs9620841(1),rs132531(1),rs132533(1),rs132534(1),rs16986825(1),rs132536(1),rs132539(1),rs13055470(1),rs2347788(1),rs8142788(1),rs469994(1),rs9613768(1),rs8137499(1),r…
17	rs10514990	50027242	1.81e-08	44	1	0	18	13	12	rs69178(1),rs203104(1),rs7225947(1),rs9906604(1),rs9901489(1),rs9896830(1),rs203035(1),rs203037(1),rs203038(1),rs1392934(1),rs203039(1),rs203041(1),rs203042(1),rs203044(1),rs996379(1),rs203049(1),rs4794315(1),rs1501253(1),rs203050(1),rs203051(1),rs8069910(1),rs1005092(1),rs12950263(1),rs8076286(1),rs9915345(1),rs9896168(1),rs7226293(1),rs7503570(1),rs2191400(1),rs11652898(1),rs11079989(1),rs98955…
3	rs6782939	39022944	1.88e-08	39	23	0	0	0	16	rs7651646(1),rs11929481(1),rs11927043(1),rs9311201(1),rs6772297(1),rs7634288(1),rs6796391(1),rs7610882(1),rs11925155(1),rs11918631(1),rs6768063(1),rs9865014(1),rs6766989(1),rs7629643(1),rs9809104(1),rs12106922(1)
11	rs288467	31061375	1.95e-08	149	12	40	30	3	64	rs273592(1),rs273614(1),rs273573(1),rs273567(1),rs273565(1),rs273559(1),rs395032(1),rs273603(1),rs273610(1),rs288469(1),rs17333520(1),rs288464(1),rs288463(1),rs11824421(1),rs648905(1),rs666036(1),rs560395(1),rs566302(1),rs597070(1),rs481589(1),rs2093713(1),rs621549(1),rs685030(1),rs208078(1),rs208076(1),rs176372(1),rs208073(1),rs208068(1),rs208064(1),rs208107(1),rs208104(1),rs208102(1),rs208100(1…
4	rs7682762	154758602	1.99e-08	80	25	16	0	1	38	rs11938228(1),rs1339(1),rs11935252(1),rs7654018(1),rs2124641(1),rs16998891(1),rs10021631(1),rs1530105(1),rs17030382(1),rs12504286(1),rs6848765(1),rs2445617(1),rs12648400(1),rs11099898(1),rs1598632(1),rs11099899(1),rs6851366(1),rs12643219(1),rs11099902(1),rs12512426(1),rs6857680(1),rs6853435(1),rs3810765(1),rs11937424(1),rs12645134(1),rs1456391(1),rs732681(1),rs1106708(1),rs12646758(1),rs10006749(…
15	rs8027457	99204101	2.01e-08	7	4	0	0	0	3	rs4966009(1),rs4966011(1),rs7179841(1)
3	rs7612166	84408145	2.06e-08	120	55	3	2	8	52	rs9841953(1),rs9862480(1),rs9856718(1),rs4618234(1),rs6778107(1),rs2222745(1),rs17793423(1),rs1918772(1),rs7625182(1),rs4856490(1),rs7637167(1),rs11706737(1),rs9819662(1),rs11924771(1),rs4402946(1),rs11923494(1),rs13093168(1),rs4563424(1),rs4390938(1),rs9818881(1),rs4538388(1),rs12496429(1),rs4599321(1),rs7639920(1),rs11925447(1),rs7620115(1),rs4599319(1),rs7614163(1),rs7645294(1),rs6548950(1),rs…
1	rs11588788	208442000	2.14e-08	15	2	0	1	3	9	rs1335045(1),rs1620298(1),rs1664234(1),rs12140101(1),rs11119027(1),rs12730749(1),rs1664228(1),rs12731099(1),rs6540460(1),rs6540462(1),rs12760062(1),rs7519730(1),rs6702300(1)
2	rs6713092	143941953	2.15e-08	63	6	40	12	1	4	rs16858857(1),rs12691671(1),rs10195682(1),rs6719577(1),rs6719609(1),rs4662318(1),rs10153706(1),rs2381401(1),rs13002158(1),rs9677486(1),rs4632274(1),rs2381402(1),rs2381403(1),rs16858944(1),rs7606446(1),rs13001483(1),rs2381407(1)
2	rs2244983	59886357	2.22e-08	13	1	8	1	0	3	rs10167515(1),rs7559163(1),rs4672311(1),rs2165763(1)
7	rs10263196	132956182	2.23e-08	49	35	3	0	0	11	rs1882538(1),rs6954975(1),rs10755879(1),rs17167160(1),rs17167168(1),rs9641952(1),rs10239061(1),rs10239077(1),rs9641953(1),rs17167187(1),rs7803626(1)
19	rs8101606	35774556	2.24e-08	30	3	11	3	2	11	rs7247282(1),rs1688012(1),rs538182(1),rs540818(1),rs564117(1),rs2073900(1),rs12979792(1),rs12986033(1),rs2073899(1),rs2280744(1),rs13345192(1),rs2280745(1),rs12973672(1),rs10405246(1),rs10414846(1),rs10421768(1)
7	rs6948145	135134802	2.27e-08	9	4	0	4	0	1	rs6951296(1),rs6467583(1),rs4732120(1),rs6467586(1),rs17168454(1)
2	rs9287475	138306981	2.41e-08	89	1	28	30	16	14	rs10496768(1),rs6715610(1),rs1073128(1),rs6741735(1),rs11680454(1),rs4954505(1),rs1463283(1),rs1463284(1),rs10928608(1),rs4954506(1),rs17740250(1),rs7568238(1),rs13411577(1),rs6430713(1),rs12990494(1),rs1349752(1),rs1349753(1),rs17678604(1),rs935923(1),rs9989745(1),rs10496771(1),rs17740707(1),rs1453305(1),rs1453304(1),rs1453303(1),rs719790(1),rs17689959(1),rs13406148(1),rs13403944(1),rs1869324(1)…
13	rs7332082	108215581	2.44e-08	11	5	1	0	0	5	rs17469200(1),rs17384605(1),rs7332705(1),rs7325754(1),rs3886168(1)
11	rs10897487	64140704	2.47e-08	37	1	1	4	1	30	rs683996(1),rs646384(1),rs632603(1),rs947939(1),rs2186572(1),rs7123026(1),rs17773078(1),rs12419038(1),rs2096706(1),rs11231713(1),rs7103915(1),rs1011219(1),rs915987(1),rs876064(1),rs731703(1),rs9787810(1),rs11231749(1),rs694739(1),rs574087(1),rs499425(1),rs663743(1),rs1199046(1),rs612448(1),rs600377(1),rs541207(1),rs538147(1),rs645078(1),rs11606081(1),rs7937023(1),rs4930168(1),rs1320628(1),rs10792…
2	rs11126769	80713142	2.53e-08	0	0	0	0	0	0	NONE
2	rs1346344	145368383	2.56e-08	35	0	1	17	9	8	rs6722387(1),rs13413446(1),rs16823886(1),rs10496964(1),rs17690892(1),rs17741930(1),rs10496965(1),rs4662388(1),rs1896453(1),rs1529386(1),rs12623452(1),rs1559962(1),rs13015001(1),rs980772(1),rs2195115(1),rs10205995(1),rs2381651(1),rs958501(1),rs1384783(1),rs10496966(1),rs1427509(1),rs2254435(1),rs2195114(1),rs7579453(1),rs1365902(1),rs10754919(1),rs706624(1),rs706625(1),rs786487(1),rs786489(1),rs78…
20	rs6088361	32557326	2.63e-08	103	72	1	0	0	30	rs4911383(1),rs6088360(1),rs4911385(1),rs6057961(1),rs1007090(1),rs2284378(1),rs2268080(1),rs1555075(1),rs6120487(1),rs1883524(1),rs3787230(1),rs6059649(1),rs2284386(1),rs2284387(1),rs6059651(1),rs8119937(1),rs909884(1),rs2284388(1),rs932388(1),rs2268089(1),rs4911407(1),rs2235596(1),rs11696338(1),rs4911408(1),rs2223553(1),rs2206448(1),rs4911410(1),rs2378078(1),rs12480839(1),rs4911414(1)
7	rs12705180	103803596	2.66e-08	62	6	7	32	9	8	rs7808273(1),rs2299405(1),rs17324174(1),rs4141408(1),rs3808017(1),rs194867(1),rs6952639(1),rs3808012(1),rs11984388(1),rs3808011(1),rs6979695(1),rs6961789(1),rs10239281(1),rs9641322(1),rs2058720(1),rs6961262(1),rs3808008(1),rs12056191(1),rs6975834(1),rs10269939(1),rs7806228(1),rs12705188(1),rs12705189(1),rs2307400(1),rs3808003(1),rs6950715(1),rs7784705(1),rs10238218(1),rs9791845(1),rs3087358(1),rs…
7	rs867973	75686007	2.7e-08	42	0	2	1	3	36	rs6965343(1),rs17685(1),rs2302434(1),rs8565(1),rs6978677(1),rs7788763(1),rs11983987(1),rs2302437(1),rs3757593(1),rs1639609(1),rs1104879(1),rs1104878(1),rs3779419(1),rs1639617(1),rs1639620(1),rs11982200(1),rs4398845(1),rs4552844(1),rs1637051(1),rs10085567(1),rs10245584(1),rs10264760(1),rs10271413(1),rs4732595(1),rs11764129(1),rs11763076(1),rs13438599(1),rs6953665(1),rs10227345(1),rs4728614(1),rs11…
8	rs2942194	23423669	2.71e-08	44	13	7	7	3	14	rs4872144(1),rs12548753(1),rs6987271(1),rs2280861(1),rs2942200(1),rs7833754(1),rs7830129(1),rs2928665(1),rs2978475(1),rs6986233(1),rs2942197(1),rs2928686(1),rs7008096(1),rs13267262(1),rs4242400(1),rs950893(1),rs6983724(1),rs12549100(1),rs13269974(1),rs13272418(1),rs13264439(1),rs1858401(1),rs11135759(1),rs11995691(1)
11	rs17244616	73293112	2.75e-08	45	16	1	2	0	26	rs2027763(1),rs2027760(1),rs7125978(1),rs7105681(1),rs7122825(1),rs7930880(1),rs7114009(1),rs1938777(1),rs7129990(1),rs2298469(1),rs11828904(1),rs7941359(1),rs7125598(1),rs11235770(1),rs2131670(1),rs1277882(1),rs7951072(1),rs7938391(1),rs7114376(1),rs7115055(1),rs17310361(1),rs7944346(1),rs7123985(1),rs12291233(1),rs17310374(1),rs11235809(1),rs10501411(1),rs12285885(1)
5	rs5012967	170810757	2.76e-08	6	3	0	0	2	1	rs6555941(1),rs10073796(1),rs12189191(1)
6	rs453590	33403422	2.77e-08	11	6	2	0	0	3	rs411136(1),rs2772376(1),rs2247385(1)
8	rs13280706	65560584	2.79e-08	51	2	0	10	17	22	rs17358602(1),rs7005708(1),rs13282866(1),rs7004685(1),rs4395923(1),rs13266877(1),rs11986615(1),rs11998077(1),rs7817744(1),rs7827287(1),rs10957321(1),rs13277887(1),rs7830315(1),rs10112206(1),rs2356986(1),rs2884074(1),rs2884073(1),rs716283(1),rs9918790(1),rs4385495(1),rs9650211(1),rs13258167(1),rs10808739(1),rs4737678(1),rs10808740(1),rs11984829(1),rs7009078(1),rs13272719(1),rs11996540(1),rs9650212…
3	rs9846102	51879687	2.79e-08	8	0	0	1	1	6	rs916288(1),rs873985(1),rs7623760(1),rs7615151(1),rs9856180(1),rs9874046(1),rs9874547(1),rs7373525(1)
16	rs16962850	61028997	2.95e-08	48	15	19	10	0	4	rs1424264(1),rs7200705(1),rs1424267(1),rs1424268(1),rs8059025(1),rs12935387(1),rs7193218(1),rs16962715(1),rs12926288(1),rs16962766(1),rs10500437(1),rs16962836(1),rs9922465(1),rs7195171(1)
2	rs13431017	202872594	3.04e-08	22	3	6	3	0	10	rs13402761(1),rs11674529(1),rs13412938(1),rs12185569(1),rs12185583(1),rs10490083(1),rs10182797(1),rs11682513(1),rs17386240(1),rs12328774(1),rs7566288(1),rs13397682(1),rs1521880(1)
10	rs4752724	116966426	3.06e-08	179	0	26	78	40	35	rs7099565(1),rs17721905(1),rs17722042(1),rs7100026(1),rs17795212(1),rs11197031(1),rs808403(1),rs808421(1),rs808418(1),rs11197038(1),rs808417(1),rs7098244(1),rs7086914(1),rs11197047(1),rs1537684(1),rs1663157(1),rs11197072(1),rs10885659(1),rs1537685(1),rs11197084(1),rs10885662(1),rs12573443(1),rs11197107(1),rs11197110(1),rs11197115(1),rs1899721(1),rs10885669(1),rs11197117(1),rs10885671(1),rs1088567…
18	rs11665085	34469465	3.06e-08	79	10	3	7	29	30	rs7228898(1),rs8089656(1),rs2172945(1),rs1076993(1),rs2644253(1),rs11661986(1),rs11664734(1),rs16968087(1),rs8085903(1),rs8086052(1),rs1565976(1),rs11660710(1),rs2957175(1),rs2644258(1),rs990462(1),rs7228184(1),rs7228089(1),rs16968149(1),rs11663887(1),rs11663891(1),rs11664763(1),rs11081960(1),rs11659977(1),rs2033116(1),rs10502665(1),rs16968181(1),rs16968184(1),rs16968192(1),rs7230513(1),rs1166415…
11	rs528205	105719522	3.08e-08	91	4	8	2	20	57	rs722295(1),rs1445613(1),rs1822989(1),rs1445617(1),rs11606220(1),rs1037090(1),rs4755107(1),rs10895857(1),rs977516(1),rs10895860(1),rs1822993(1),rs11226827(1),rs11226828(1),rs10791767(1),rs1445619(1),rs17104446(1),rs2028816(1),rs1373926(1),rs495498(1),rs639076(1),rs638099(1),rs11601808(1),rs12417624(1),rs519193(1),rs12290919(1),rs590928(1),rs12574549(1),rs556609(1),rs12808612(1),rs632100(1),rs7926…
22	rs9306356	42567090	3.11e-08	51	23	18	2	2	6	rs4822066(1),rs5996091(1),rs4822075(1),rs916440(1),rs9623534(1),rs7287503(1),rs5996130(1),rs9623546(1),rs12168969(1),rs6002681(1)
3	rs7638452	110180719	3.11e-08	129	6	39	19	31	34	rs12638014(1),rs12632602(1),rs11708583(1),rs11720997(1),rs1398422(1),rs17726755(1),rs17726773(1),rs17726797(1),rs17675851(1),rs6767880(1),rs10934040(1),rs9871808(1),rs1913127(1),rs1533212(1),rs1533213(1),rs13080049(1),rs4682585(1),rs12633668(1),rs1398410(1),rs4682587(1),rs1106078(1),rs6787448(1),rs6788158(1),rs13058952(1),rs12635060(1),rs12629741(1),rs12629785(1),rs13065612(1),rs2399340(1),rs1263…
8	rs16905571	91883119	3.13e-08	108	16	3	54	2	33	rs1463921(1),rs4546617(1),rs4735418(1),rs4735419(1),rs1857752(1),rs1354518(1),rs7014480(1),rs10808631(1),rs7813402(1),rs7830264(1),rs6999838(1),rs978559(1),rs10808632(1),rs10808633(1),rs997899(1),rs997898(1),rs12675931(1),rs2631015(1),rs2631014(1),rs1011254(1),rs1160329(1),rs2631031(1),rs1386112(1),rs2740799(1),rs1386113(1),rs1003996(1),rs2339289(1),rs1542666(1),rs2339291(1),rs1002583(1),rs263100…
18	rs9954909	74545087	3.15e-08	28	0	5	5	5	13	rs4890829(1),rs11661544(1),rs12607778(1),rs7236466(1),rs17652264(1),rs9973056(1),rs11664189(1),rs4890779(1),rs2658747(1),rs12963854(1),rs2658746(1),rs1943249(1),rs2658745(1),rs12957115(1),rs7241936(1),rs12956701(1),rs4890866(1),rs8091823(1),rs3794869(1),rs8091200(1),rs8086010(1),rs937824(1),rs8094402(1)
16	rs8049897	90024202	3.19e-08	46	25	15	0	1	5	rs12918773(1),rs12921383(1),rs1805007(1),rs4408545(1),rs3803683(1),rs4785763(1)
10	rs1013619	120187780	3.2e-08	16	1	0	0	7	8	rs236213(1),rs7072116(1),rs7923757(1),rs10787825(1),rs766478(1),rs11198393(1),rs1857269(1),rs2152534(1),rs1932537(1),rs1935916(1),rs12220471(1),rs10886243(1),rs11198408(1),rs1013620(1),rs11198411(1)
4	rs722826	174098060	3.24e-08	47	7	8	2	4	26	rs13113398(1),rs4293766(1),rs11725123(1),rs9884450(1),rs9884453(1),rs10002880(1),rs13137793(1),rs10520252(1),rs6553679(1),rs7689781(1),rs6855544(1),rs2006808(1),rs17059191(1),rs6553680(1),rs7669267(1),rs722827(1),rs11942280(1),rs13151627(1),rs6822924(1),rs10520255(1),rs7667345(1),rs17059205(1),rs7668473(1),rs17059207(1),rs13141844(1),rs2332658(1),rs10520256(1),rs9995556(1),rs17059217(1),rs4608791…
12	rs13561	106903321	3.27e-08	29	17	0	0	3	9	rs6539262(1),rs10778462(1),rs7965616(1),rs6539264(1),rs1532586(1),rs4964460(1),rs7298576(1),rs2250441(1),rs11113012(1),rs7137638(1),rs3851635(1),rs2288266(1)
6	rs834366	19002681	3.45e-08	143	37	53	23	17	13	rs6936986(1),rs6938254(1),rs6941968(1),rs13195641(1),rs10949545(1),rs12211970(1),rs9465222(1),rs6904085(1),rs2224661(1),rs987386(1),rs13198682(1),rs3899982(1),rs1033822(1),rs2787866(1),rs4716307(1),rs1538279(1),rs2798142(1),rs9396909(1),rs9383439(1),rs9358178(1),rs16881470(1),rs912981(1),rs988458(1),rs1344345(1),rs985981(1),rs1855609(1),rs986759(1),rs834367(1),rs1977368(1),rs10949576(1),rs9477957…
1	rs6588375	50594946	3.47e-08	101	0	31	38	6	26	rs1343424(1),rs3118215(1),rs1543562(1),rs1341166(1),rs3118221(1),rs3118222(1),rs3121515(1),rs3127556(1),rs3121518(1),rs3118226(1),rs12141962(1),rs3934240(1),rs6665118(1),rs768328(1),rs12036714(1),rs12049328(1),rs7528510(1),rs12124042(1),rs7546830(1),rs733702(1),rs1431638(1),rs241501(1),rs241472(1),rs241497(1),rs12036551(1),rs1494461(1),rs1494462(1),rs2356392(1),rs12725943(1),rs1766377(1),rs950562…
1	rs529553	20884833	3.53e-08	22	5	0	10	2	5	rs7414922(1),rs6663450(1),rs12076947(1),rs1044332(1),rs17412284(1),rs12566937(1),rs6669244(1),rs7544348(1),rs7552144(1),rs10916809(1),rs10916810(1),rs6698887(1),rs17404136(1),rs12073420(1),rs12072199(1),rs6689263(1),rs569660(1)
6	rs1737333	163812707	3.69e-08	62	0	0	0	3	59	rs2064223(1),rs2064225(1),rs2064228(1),rs2784874(1),rs1737323(1),rs6455897(1),rs4709713(1),rs13202733(1),rs768662(1),rs7767891(1),rs13211340(1),rs4709715(1),rs1541141(1),rs9365565(1),rs2759388(1),rs2759387(1),rs2784867(1),rs2757589(1),rs2759385(1),rs2757580(1),rs2759384(1),rs2759383(1),rs2757588(1),rs783136(1),rs814143(1),rs783138(1),rs2759390(1),rs2759391(1),rs2759393(1),rs2757586(1),rs813640(1)…
9	rs7020626	126338482	3.69e-08	65	26	11	9	5	14	rs7045048(1),rs4838065(1),rs4836929(1),rs4838066(1),rs10513428(1),rs12378293(1),rs4836931(1),rs4838069(1),rs4836932(1),rs10986051(1),rs4838070(1),rs7860055(1),rs10117940(1),rs4838075(1),rs4838076(1),rs4838077(1),rs7034451(1),rs16926775(1),rs1857393(1),rs7868740(1),rs10818864(1),rs16926787(1),rs10818865(1),rs7850520(1),rs7850870(1),rs16926797(1),rs2479106(1),rs1778900(1)
16	rs16956168	56249774	3.76e-08	71	2	4	3	47	15	rs8053317(1),rs7205408(1),rs896123(1),rs2398141(1),rs2398142(1),rs4784632(1),rs1581054(1),rs1858221(1),rs1510192(1),rs1397148(1),rs1376203(1),rs1510189(1),rs6499820(1),rs2008084(1),rs2111111(1),rs1376204(1),rs8064103(1),rs7202017(1),rs9929277(1),rs3909221(1),rs8052085(1),rs995948(1),rs12598346(1),rs11076141(1),rs987164(1),rs4784638(1),rs7203705(1),rs8057753(1),rs8052869(1),rs8050235(1),rs1450732(…
9	rs543843	122055148	3.82e-08	55	23	1	9	5	17	rs1332455(1),rs2065447(1),rs1332443(1),rs1221136(1),rs564752(1),rs653473(1),rs1853679(1),rs1221140(1),rs679134(1),rs680003(1),rs731133(1),rs1221143(1),rs471215(1),rs792933(1),rs661999(1),rs7030105(1),rs7862772(1),rs942517(1),rs10818296(1),rs10760033(1),rs10739534(1),rs12378746(1),rs1886372(1),rs10760034(1),rs10984476(1),rs7044898(1),rs1408516(1),rs10115812(1),rs10984494(1),rs10818299(1),rs1324621…
14	rs2021717	77549763	4e-08	10	0	1	1	3	5	rs4903529(1),rs12434503(1),rs879027(1),rs6574349(1),rs4021417(1),rs205810(1),rs2160664(1),rs918140(1),rs937720(1)
10	rs10886272	120331924	4.05e-08	32	10	13	2	1	6	rs12249078(1),rs493066(1),rs4752174(1),rs2676830(1),rs10886273(1),rs1766275(1),rs4752176(1),rs11198503(1),rs11198510(1)
8	rs2979182	8325448	4.1e-08	3	0	0	0	0	3	rs2980772(1),rs2921045(1),rs2921044(1)
1	rs3010107	27298624	4.14e-08	6	0	0	3	0	3	rs11247596(1),rs11247599(1),rs7527776(1),rs3170660(1),rs1152981(1),rs3010110(1)
4	rs1801915	89653257	4.18e-08	41	7	16	11	1	6	rs3844296(1),rs9991751(1),rs2604210(1),rs2602116(1),rs7657817(1),rs11944668(1),rs3822077(1),rs2278876(1),rs10011342(1),rs7662156(1),rs1965869(1),rs9991328(1),rs10428504(1),rs2167750(1),rs2125407(1),rs7694958(1),rs13133548(1),rs3822072(1)
21	rs1016930	31322913	4.36e-08	28	4	3	0	0	21	rs458956(1),rs457503(1),rs460583(1),rs460351(1),rs467028(1),rs465566(1),rs460917(1),rs455892(1),rs2255821(1),rs2832492(1),rs2243533(1),rs2243535(1),rs466476(1),rs2243436(1),rs2832494(1),rs2832495(1),rs2245528(1),rs458965(1),rs455400(1),rs1012042(1),rs1012041(1)
21	rs2833507	33163612	4.37e-08	20	9	0	1	1	9	rs204740(1),rs2833497(1),rs743388(1),rs9305469(1),rs2154699(1),rs13049044(1),rs2032309(1),rs2833515(1),rs2833523(1),rs9980739(1),rs2833534(1)
20	rs11699547	41838127	4.47e-08	13	2	0	6	1	4	rs2205773(1),rs734981(1),rs734982(1),rs2867656(1),rs6030703(1),rs2103549(1),rs6016986(1),rs2294244(1),rs1883201(1),rs6030705(1),rs13039861(1)
8	rs2304282	142229543	4.6e-08	20	1	5	6	1	7	rs13261781(1),rs11579(1),rs2474(1),rs3739242(1),rs3739240(1),rs3739238(1),rs753779(1),rs3824234(1),rs2304279(1),rs4961338(1),rs4961258(1),rs12549914(1),rs4437700(1),rs12543725(1)
10	rs4933772	83160854	4.69e-08	114	35	5	11	37	26	rs11189499(1),rs11189515(1),rs2346229(1),rs2493563(1),rs528993(1),rs9420663(1),rs10786402(1),rs586063(1),rs473372(1),rs649207(1),rs510598(1),rs511460(1),rs633066(1),rs632593(1),rs619293(1),rs11189537(1),rs265458(1),rs2026051(1),rs11189579(1),rs265508(1),rs265507(1),rs265506(1),rs265505(1),rs1410912(1),rs265504(1),rs265503(1),rs265502(1),rs2008669(1),rs265501(1),rs2818821(1),rs265472(1),rs11516928…
5	rs12522495	80251379	4.84e-08	12	10	0	0	0	2	rs10491488(1),rs888822(1)
1	rs12408774	72916914	4.9e-08	40	33	0	4	1	2	rs12123328(1),rs4322186(1),rs12133881(1),rs12119736(1),rs6698502(1),rs1445590(1),rs982910(1)
11	rs10768418	38832622	4.94e-08	100	1	1	16	17	65	rs12806812(1),rs4756436(1),rs10501197(1),rs10768378(1),rs11034713(1),rs11034715(1),rs11601949(1),rs17620842(1),rs11034720(1),rs11034723(1),rs17694214(1),rs17621211(1),rs4271366(1),rs4290204(1),rs11034724(1),rs12787240(1),rs17621402(1),rs17621470(1),rs1550063(1),rs1435161(1),rs1435160(1),rs1897938(1),rs2861193(1),rs2861198(1),rs7928602(1),rs10837001(1),rs965774(1),rs10837011(1),rs11034859(1),rs205…
2	rs4972581	174357864	4.96e-08	17	0	0	0	0	17	rs7349190(1),rs12997647(1),rs12997689(1),rs4387754(1),rs11688731(1),rs13004465(1),rs12620935(1),rs892359(1),rs2009699(1),rs10497393(1),rs10930601(1),rs1369648(1),rs6719618(1),rs1318427(1),rs2358260(1),rs6736440(1),rs579402(1)
18	rs1509222	36628201	4.99e-08	70	25	2	1	0	42	rs17598286(1),rs16971248(1),rs4327120(1),rs7242296(1),rs16971283(1),rs16971284(1),rs16971305(1),rs16971307(1),rs12604160(1),rs8083957(1),rs10502716(1),rs16971336(1),rs16971339(1),rs10502717(1),rs2175064(1),rs2175061(1),rs16971387(1),rs16971395(1),rs16971404(1),rs8083419(1),rs16971469(1),rs16971487(1),rs16971498(1),rs16971505(1),rs1509223(1),rs8088142(1),rs1509224(1),rs8093036(1),rs1355147(1),rs90…

## Sheet: ST4
Supplementary Table 4. Significant PheWAS results for novel externalizing lead SNPs.
SNP: rs1961547
atlas ID	PMID	Year	Domain	Trait	P-value	N	EA	NEA
4043	30124842	2018	Skeletal	Height	3.5e-19	693529	C	T
4377	30940143	2019	Cardiovascular	Resting heart rate	5.4e-13	458969	T	C
3447	31427789	2019	Metabolic	Impedance measures - Impedance of whole body	1.49e-11	379792	C	T
4294	30696823	2019	Psychiatric	Chronotype	3.9e-11	449732	C	T
3271	31427789	2019	Skeletal	Comparative height size at age 10	5.03e-11	380167	C	T
3187	31427789	2019	Skeletal	Standing height	4.34e-10	385748	C	T
3451	31427789	2019	Metabolic	Impedance measures - Impedance of arm (left)	4.45e-10	379803	C	T
4295	30696823	2019	Psychiatric	Morning person (binary)	8.8e-10	403195	C	T
3448	31427789	2019	Metabolic	Impedance measures - Impedance of leg (right)	1.18e-09	379813	C	T
3449	31427789	2019	Metabolic	Impedance measures - Impedance of leg (left)	1.33e-09	379807	C	T
3450	31427789	2019	Metabolic	Impedance measures - Impedance of arm (right)	5.2e-09	379786	C	T
3230	31427789	2019	Psychiatric	Morning/evening person (chronotype)	6.84e-09	345148	T	C
3789	30804565	2019	Psychiatric	Morningness	1.23e-08	345552	C	T
3468	31427789	2019	Metabolic	Impedance measures - Trunk fat percentage	1.6e-08	379600	C	T
3188	31427789	2019	Cardiovascular	Pulse rate (automated reading)	8.33e-08	361411	T	C
3469	31427789	2019	Metabolic	Impedance measures - Trunk fat mass	1.83e-07	379578	C	T
3441	31427789	2019	Metabolic	Impedance measures - Body fat percentage	2.34e-07	379615	C	T
3217	31427789	2019	Activities	Time spend outdoors in summer	2.58e-07	350364	C	T
4280	30804560	2019	Respiratory	FEV1/FVC ratio	1.99e-06	400102	C	T
4306	30664634	2019	Metabolic	Trunk-trunk fat ratio (female)	5.497e-06	195068	C	T
3442	31427789	2019	Metabolic	Impedance measures - Whole body fat mass	5.576e-06	379203	C	T
3452	31427789	2019	Metabolic	Impedance measures - Leg fat percentage (right)	5.724e-06	379806	C	T
4304	30664634	2019	Metabolic	Legs-leg fat ratio (female)	6.746e-06	195068	T	C
4284	30804560	2019	Respiratory	FEV1/FVC ratio	7.06e-06	321047	C	T
3456	31427789	2019	Metabolic	Impedance measures - Leg fat percentage (left)	1.171e-05	379786	C	T
3409	31427789	2019	Environment	Education - Qualifications	1.385e-05	318526	T	C
4066	30038396	2018	Environment	Educational attainment	1.84e-05	766345	T	C
142	25282103	2014	Skeletal	Height	2.3e-05	253288	C	T
1141	27494321	2016	Psychiatric	Chronotype	3.9e-05	128266	C	T
4625	31676860	2019	Neurological	Left pallidum	0.0001161	21821	C	T
4301	30664634	2019	Metabolic	Arms-arm fat ratio (male)	0.000152	167431	T	C
SNP: rs9316
No significant associations after Bonferroni correction.
SNP: rs7682762
atlas ID	PMID	Year	Domain	Trait	P-value	N	EA	NEA
3982	29483656	2018	Psychiatric	Schizophrenia	6.48e-06	105318	G	A
4610	31676860	2019	Neurological	Cerebellar vermal lobules VIII X	7.546e-06	21821	G	A
3655	31427789	2019	Psychiatric	Smoking status: Previous vs Current	1.599e-05	177025	A	G
4509	31676860	2019	Neurological	Cerebellar vermal lobules VIII X	2.267e-05	19629	G	A
3235	31427789	2019	Psychiatric	Current tobacco smoking	3.298e-05	386150	G	A
4547	31676860	2019	Neurological	Left caudal middle frontal	0.0001534	21821	G	A
11	25056061	2014	Psychiatric	Schizophrenia	0.0001906	82315	G	A
13	24280982	2014	Psychiatric	Schizophrenia vs Bipolar disorder	0.0001906	16381	G	A
3397	31427789	2019	Respiratory	Shortness of breath walking on level ground	0.0001986	126962	G	A
4040	29906448	2018	Psychiatric	Schizophrenia/Bipolar disorder	0.0002606	107620	G	A
SNP: rs1473811
atlas ID	PMID	Year	Domain	Trait	P-value	N	EA	NEA
3578	31427789	2019	Social Interactions	Social support - Leisure/social activities: Religious group	4.403e-05	385280	A	G
4174	29970889	2018	Social Interactions	Social support - Leisure/social activities: Religious group	8.9e-05	452302	A	G
4071	BioRxiv: https://doi.org/10.1101/261081	2018	Reproduction	Number of sexual partners	0.0001383	370711	G	A
1086	22523087	2012	Neoplasms	Pancreatic cancer	0.0002338	7785	G	A

## Sheet: ST5
Supplementary Table 5. Results for SNPs with heterogenous effects across the internalizing spectrum.
SNP	CHR	BP	Q_Pval	INT_p	ANX_p	Irritable_p	Lonely_p	MDD_p	Misery_p	PTSD_p	Wellbeing_p
rs10016452	4	119277490	3.83e-09	0.00069153	0.263907	0.815955	0.581627	1.29e-06	1.22e-05	0.05229	0.2139
rs1009549	1	117927803	3.43e-10	0.0319027	5.41e-05	0.370201	0.27075	7.25e-07	0.885789	0.1473	0.01265
rs10119773	9	23736400	3.59e-15	5.1e-08	0.0895895	0.213214	0.000179246	4.77e-12	5.27e-06	0.1896	0.0147
rs10125775	9	36993071	7.16e-14	4.95e-05	0.000159828	0.186186	0.816104	3.42e-11	0.29736	0.00712	0.1533
rs10148367	14	103357310	2.15e-11	0.00485861	0.0012104	0.717905	0.106336	3.51e-09	0.356486	0.01553	0.684
rs1035400	5	151709900	2.25e-09	0.00029405	0.101101	0.282577	9.54e-09	0.0008843	0.0383457	0.669	0.002044
rs1043361	20	47731158	5.25e-13	1.47e-06	0.0459592	0.167328	7.95e-07	1.1e-06	0.00117847	0.1026	3.76e-05
rs10495982	2	50424877	4.45e-08	0.00155112	0.024376	0.49767	0.0102545	1.26e-05	0.000842712	0.1919	0.08321
rs10514370	5	92435481	3.36e-12	9.23e-06	0.000684882	0.205331	0.0621467	8.81e-10	0.0100138	0.002692	0.04698
rs1074057	18	50367848	1.49e-09	6.4e-06	0.00998916	0.0461122	0.0753	5.96e-09	0.0277983	0.3234	0.04159
rs10779023	12	84074475	4.87e-09	0.00085633	0.00119572	0.917172	0.00871042	5.41e-07	0.0665151	0.6664	0.08217
rs10783484	12	52331681	2.72e-11	2.45e-05	0.00244973	0.226465	0.00186888	5.07e-07	0.0402595	0.03931	0.0001443
rs10787825	10	120164583	2.45e-08	0.00461455	0.00454561	0.442823	0.00161738	9.77e-05	0.0168138	0.995	0.008525
rs10789340	1	72940273	2.08e-21	3.3e-07	0.00534745	0.0229119	0.0718825	1.21e-18	0.146202	0.1811	0.1243
rs10818400	9	122664468	3.74e-20	2.17e-09	8.42e-05	0.432489	4.3e-05	3.8e-11	1.42e-06	0.00015	0.03978
rs10838658	11	47130778	9.06e-10	4.63e-07	0.461661	0.22663	1.46e-05	1.58e-05	2.82e-08	0.693	0.003725
rs10866752	5	164669629	3.61e-13	0.00025602	2.87e-07	0.814517	0.0527256	3.68e-08	0.189055	0.6729	0.04115
rs10931670	2	195907027	4.37e-08	4.18e-05	0.0445562	0.316163	0.034361	2.24e-07	0.00205194	0.6345	0.03331
rs10959640	9	11225906	2.31e-08	2.45e-05	0.00678858	0.370096	0.13515	4.02e-08	0.0010529	0.6349	0.1522
rs10973272	9	37257282	2.73e-16	1.51e-07	0.00122931	0.00273351	0.0363923	2.82e-14	0.271021	0.009449	0.552
rs11078936	17	38197914	1.06e-09	1.17e-06	0.0537269	0.101368	0.000199915	1.11e-07	0.000178186	0.01599	0.375
rs1125313	18	52859261	1.94e-14	8.65e-08	0.000342965	0.34419	0.0125995	1.18e-10	1.24e-05	0.7517	0.002593
rs11263943	1	37198130	1.25e-11	1.35e-07	0.127743	0.0318358	0.141177	3.41e-11	8.25e-05	0.01718	0.3737
rs1153922	7	54655459	1.47e-08	8.99e-05	0.00217191	0.362972	0.0434887	1.25e-06	0.0241945	0.002792	0.1124
rs1155397	7	114953597	4.08e-10	0.00763577	0.0512997	0.195554	0.00382001	8.75e-07	0.51011	0.6368	0.0009465
rs11579246	1	50559162	5.51e-10	3.08e-07	0.0029257	0.0123728	0.00946458	1.06e-09	0.0234273	0.4369	0.08354
rs11616237	13	97129981	8.73e-10	0.00687405	0.00400517	0.781043	0.329664	4.33e-07	0.238166	0.00369	0.5257
rs11631410	15	78013273	8.9e-09	2.41e-08	0.00383828	0.250452	7.85e-06	0.001465	3.36e-10	0.9839	0.0236
rs11764337	7	1892309	1.16e-19	3.2e-15	0.0143153	0.000103464	0.0492773	3.99e-15	6.83e-10	7.29e-07	0.5217
rs11777872	8	64525347	6.72e-12	0.314634	0.133848	0.000414672	0.637157	1.22e-07	0.00544604	0.2862	0.5275
rs11935803	4	59873221	6.12e-09	0.00020346	0.179897	0.032441	0.0594117	3.06e-09	0.271545	0.5356	0.3237
rs12042609	1	197477448	1.9e-08	1.88e-06	0.0327076	0.00508995	0.0111415	4.7e-09	0.0354387	0.7088	0.6749
rs12100867	14	101513087	1.93e-10	0.00030133	0.0138087	0.776657	0.0301174	1.58e-06	0.00136978	0.01048	0.01612
rs12111969	7	3571289	1.2e-08	0.00072505	0.153659	0.595379	0.847752	3.61e-08	0.00931314	0.01729	0.3924
rs12136984	1	73725998	5.26e-23	9.31e-11	1.89e-06	4.56e-06	0.330883	2.53e-16	0.302396	0.0008504	0.5836
rs12153009	5	42553879	2.67e-08	0.004897	0.000917081	0.843208	0.982838	2.37e-06	0.264892	0.004259	0.06805
rs12244751	10	107409168	9.15e-11	0.00030665	2.45e-05	0.971591	0.0136359	1.14e-05	0.0364482	0.001422	0.1285
rs12435856	14	41853845	1.01e-08	8.82e-06	0.00324888	0.0197406	0.0143288	7.72e-06	0.0747863	0.7553	2.74e-05
rs12539616	7	126037381	2.46e-08	6.07e-07	8.77e-05	0.0414353	5.15e-05	0.0001196	0.00478877	0.02576	0.06358
rs12629785	3	110198371	4.65e-12	8.07e-06	0.000260757	0.276918	0.00136521	1.08e-07	0.00412966	0.007292	0.005894
rs12661596	6	17016400	2.98e-08	0.00065188	0.0300903	0.573364	0.00705596	8.16e-08	0.0311278	0.5549	0.5236
rs1267067	2	162007748	1.21e-14	1.09e-05	0.000331004	0.769608	0.699619	3.52e-10	9.08e-06	0.1146	0.8833
rs12740041	1	197814607	1.72e-10	1.03e-06	0.0132873	0.0392339	0.482587	3.5e-10	0.0011783	0.8001	0.1708
rs12794570	11	47658314	5.65e-13	1.34e-09	0.00253665	0.103302	9.95e-08	4.14e-06	1.85e-08	0.9883	0.0004514
rs12807357	11	57656902	4.96e-15	1.15e-09	4.65e-05	0.000420192	0.00202572	2.89e-11	0.0413184	0.0002035	0.4528
rs1286060	14	91458156	5.8e-10	0.0449627	0.155442	0.0686516	0.176513	5.77e-08	0.00904813	0.04881	0.6657
rs12954615	18	31384449	1.12e-11	9.84e-07	2.03e-05	0.0485248	0.00989606	4.67e-08	0.028882	0.8717	0.0002019
rs12963887	18	36924065	1.24e-11	5.26e-05	0.00147521	0.945015	0.175623	1.28e-07	0.000545333	0.002133	0.1621
rs13043475	20	51209603	2.74e-08	0.00023438	0.137291	0.304125	0.00220359	4.34e-06	0.0209173	0.7131	0.0002273
rs13073833	3	117623955	1.05e-09	0.0783853	0.00306172	0.0935387	0.15699	3.52e-08	0.489007	0.07849	0.4355
rs13150296	4	140933504	2.19e-13	0.0003544	0.00160829	0.865419	0.00740019	1.48e-08	0.041478	2.76e-05	0.1671
rs1319637	18	53207325	2.83e-08	0.0392547	0.00257542	0.402762	0.334394	3.16e-05	0.460086	0.09556	0.003144
rs13260351	8	65570867	6.45e-10	1.51e-08	0.0117971	0.00440677	0.0659327	3.76e-09	0.000372733	0.008401	0.07042
rs13264899	8	14195773	1.78e-09	0.00210054	0.699455	0.562534	0.109484	7.69e-09	0.0535396	0.02226	0.1952
rs13285097	9	31165455	2.3e-10	2.04e-05	0.0188054	0.0612722	0.000563321	1.14e-08	0.129643	0.37	0.02449
rs13326904	3	181183388	4.57e-08	0.0940984	0.12765	0.0912511	0.781296	6.44e-05	0.101971	0.0001091	0.02996
rs13388046	2	52315845	2.96e-08	0.0066658	0.403382	0.61303	0.0727095	3.56e-08	0.0102696	0.3487	0.2518
rs13400161	2	212710934	2.9e-12	4.55e-05	0.000117658	0.577423	5.07e-07	2.54e-06	0.0332546	0.7195	0.02552
rs1402578	3	118594133	1.28e-08	0.00155789	0.00856736	0.496172	0.527043	6.74e-08	0.15779	0.01894	0.5624
rs1407736	10	77620021	2.76e-09	5.39e-08	0.189638	0.00111783	0.0452564	1.52e-07	0.00100302	0.00335	0.001461
rs1431087	2	226483833	4.44e-08	6.22e-07	0.00338335	0.199709	0.0103579	9.28e-05	6.85e-06	0.009697	0.00677
rs1437337	2	142495424	9.57e-12	0.0007287	0.00339988	0.600502	0.0276446	3.22e-07	0.296467	1.48e-05	0.07824
rs1441103	2	104467808	3.14e-09	9.45e-05	0.0248769	0.226187	0.0809684	4.85e-09	0.0376534	0.04287	0.8222
rs1452787	18	53207207	1.95e-16	2.87e-15	5.9e-06	1.19e-06	4.32e-06	4.69e-12	0.000145365	0.001695	0.1562
rs1548884	7	12279761	3.29e-15	7.01e-18	1.14e-06	2.96e-07	7.01e-07	4.12e-12	5.59e-08	0.1095	0.1738
rs1554929	11	113278764	5.7e-17	3.18e-11	4.82e-05	0.0202085	0.00132552	7.22e-14	5.1e-06	0.4562	0.009702
rs1562612	8	59817068	3.24e-13	0.0110079	0.0180059	0.4755	0.000128869	1.74e-07	0.453037	0.0002478	0.0254
rs161645	5	104069917	1.72e-21	4.46e-09	6.5e-06	0.00506024	1.47e-07	2.73e-15	0.0786858	0.417	0.06781
rs1684693	14	42548257	1.18e-08	0.025848	0.652548	0.43736	0.194293	3.21e-07	0.0277412	0.001249	0.8354
rs16909978	9	98307990	4.82e-09	2.77e-10	2.81e-05	0.000440988	0.121072	4.32e-07	0.000221094	0.01245	0.009404
rs16962629	16	13773131	1.97e-08	0.00117671	0.00931452	0.158516	0.0747673	4.41e-08	0.603998	0.5907	0.4839
rs17030613	1	113190807	1.94e-10	1.14e-05	0.00109473	0.0263628	0.00166308	6.1e-05	0.137471	6.67e-07	0.5888
rs17069579	5	167437327	6.94e-10	0.00109648	0.49853	0.30677	1.1e-05	1.29e-07	0.174161	0.7107	0.04064
rs17183201	14	75288697	1.27e-09	4.47e-05	0.28917	0.0159116	0.129497	5.76e-08	0.136802	0.01512	0.00321
rs17304995	3	53070755	1e-08	0.0276035	0.0547241	0.777041	0.154914	1.41e-07	0.664102	0.5626	0.001406
rs17501068	2	50923733	4.37e-12	1.07e-07	0.000892165	0.216384	2.04e-06	2.23e-07	5.61e-05	0.1812	0.03059
rs17512609	12	118791877	1.34e-11	5.28e-08	0.0099576	0.00771372	8.24e-07	7.15e-08	0.00864398	0.01972	0.0262
rs17552977	11	16303359	4.18e-11	6.17e-08	3.13e-06	0.128868	0.411305	1.65e-06	3.83e-05	0.001207	0.06741
rs17618045	2	63793255	3.08e-11	7.38e-07	8.33e-05	0.0348241	0.000217555	1.49e-06	0.0421803	0.002994	0.00665
rs17723244	3	117710096	1.23e-10	0.00011251	0.0977497	0.149405	0.00957671	2.46e-10	0.146508	0.133	0.1073
rs17752199	6	51406848	1.72e-09	0.0001352	0.00306501	0.367176	0.28225	1.2e-08	0.0543417	0.01273	0.343
rs17766570	10	106529564	1.99e-15	5.55e-06	0.000339361	0.779088	0.214425	6.62e-11	9.06e-06	0.9673	0.4411
rs17775184	14	98647550	4.63e-09	0.0002188	0.00119575	0.385583	0.00128464	2.52e-07	0.109925	0.9312	0.2096
rs17794133	9	11547243	4.61e-18	8.63e-12	3.44e-11	0.0037215	0.0475695	1.22e-11	0.000480292	0.006632	0.6949
rs17812877	5	7382233	1.36e-08	0.0356571	0.175101	0.740765	0.000672445	1.72e-06	0.733142	0.06188	0.04716
rs1796518	6	26388672	1.92e-12	5.79e-07	2.68e-05	0.266252	0.00473191	5.41e-09	0.00109349	0.4781	0.1134
rs1820285	18	53687011	2.06e-08	3.98e-06	0.0068142	0.589327	0.013178	1.75e-06	9.59e-07	0.6558	0.8431
rs1867368	13	53903511	1.38e-12	0.477767	0.00561661	0.00230566	0.948462	1.47e-09	0.758488	0.001539	0.558
rs1937787	1	80839278	2.89e-08	1.51e-06	0.015008	0.00160141	0.00141882	1.86e-07	0.0965146	0.08808	0.8706
rs1941954	18	35159596	1.98e-16	2.77e-15	0.00282534	1.46e-05	0.0765163	3.45e-15	1.08e-08	0.0007446	0.8123
rs1950835	14	42076640	1.17e-18	8.65e-07	7.65e-05	0.295019	0.838479	1.35e-14	0.00713579	0.2517	0.004555
rs1975488	4	90984432	1.35e-09	0.00121824	0.07882	0.815118	0.00636164	2.02e-08	0.059573	0.006113	0.8628
rs1989903	7	114137940	1.42e-16	3.79e-10	8.04e-05	0.000113339	3.21e-05	7.16e-10	0.060937	0.0004304	0.01941
rs1994190	4	80228200	4.37e-10	0.0006812	0.687449	0.00823983	0.612594	3.46e-07	0.498436	0.003138	0.0008909
rs2001609	9	96395363	1.58e-11	0.0003519	0.715684	0.733471	0.00170906	4.4e-10	0.00189896	0.5561	0.5821
rs2036826	8	14449928	1.04e-10	0.310994	0.355455	0.516576	0.0687112	4.26e-07	0.150331	0.0003687	0.009857
rs2047010	9	37077947	2.29e-09	1.4e-05	0.0374239	0.00103949	0.773599	7.24e-09	0.277523	0.004678	0.7755
rs2059250	16	60730542	1.01e-11	0.00012301	0.0116784	0.00753322	0.884496	4.18e-10	0.7459	0.04273	0.5234
rs2071303	6	26091336	4.2e-10	1.32e-06	0.0173091	0.152622	5.1e-06	3.43e-06	0.000399245	0.02713	0.05272
rs2071754	11	31812582	4.6e-09	1.54e-12	3.43e-05	6.61e-09	0.462455	8.94e-08	0.0051456	0.02764	0.02725
rs2111593	2	208046998	4.78e-15	0.00029927	0.122065	0.678085	0.504261	3.46e-12	0.000663067	0.1203	0.1922
rs2143799	1	177402972	3.06e-09	2.44e-05	0.00308009	0.000357964	0.0855095	1.63e-07	0.905788	0.121	0.6178
rs2167014	14	85054049	4.84e-08	0.0405596	0.23124	0.471514	0.463909	6.89e-05	0.00863728	0.0001437	0.1332
rs2182139	14	60149233	3.49e-08	8.88e-05	0.0191934	0.176973	0.659724	1.26e-06	0.00611519	0.2699	0.001725
rs2232422	6	28366262	2.34e-10	9.06e-07	0.0396796	0.326967	0.00688461	1.98e-07	4.15e-06	0.04912	0.01848
rs2232429	6	28359632	3.03e-35	6.83e-08	7.43e-07	0.633737	0.0128529	2.82e-21	3.14e-05	0.02792	5.44e-06
rs224146	10	64482939	1.13e-08	0.00675006	0.00329277	0.354152	0.643908	9.48e-06	0.821289	0.002768	0.01178
rs2271961	3	49878113	7.54e-16	6.99e-08	0.00128353	0.608002	0.00373598	1.19e-10	1.63e-07	0.005742	0.3254
rs2274051	13	99091634	3.36e-10	1.54e-06	1.26e-06	0.0358179	0.00390326	4.51e-07	0.0413254	0.2164	0.3497
rs2288466	5	26988328	1e-08	0.0002765	0.0264116	0.818099	0.0132291	6.69e-07	0.00454604	0.6589	0.01704
rs2294428	6	11729842	8.84e-09	2.21e-05	0.0782117	0.184533	3.84e-05	9.31e-05	0.00198114	0.7057	4.79e-05
rs2320786	17	27422053	3.1e-08	0.0539399	0.0239862	0.105687	0.00131338	0.0004749	0.0590497	0.003665	0.206
rs2346452	7	133748475	2.43e-09	0.00653185	0.0258495	0.109915	0.00226483	4.41e-05	0.476984	0.0002104	0.6939
rs2398845	9	96365612	4.25e-16	7.26e-11	6.88e-05	0.00266507	5.01e-11	7.94e-10	0.000452031	0.2499	0.8165
rs2402273	7	117600424	4.12e-11	8.44e-08	0.00119903	0.139428	0.0436952	3.45e-09	1.11e-05	0.03406	0.6136
rs2496014	10	106599009	5.36e-23	3.27e-09	0.000725155	0.339162	0.00482504	6.91e-18	3.18e-06	0.75	0.2302
rs2653758	12	38946233	4.28e-08	0.00367652	0.249041	0.750946	0.091708	6.66e-07	0.0778512	0.1961	0.002966
rs2715147	7	82448405	3.77e-11	8.9e-09	0.00403374	0.1018	0.00296821	1.71e-08	8.72e-07	0.3448	0.01429
rs2789444	1	164734457	2.51e-09	0.00633223	0.322182	0.677119	0.796081	2.11e-07	0.00228831	0.03958	0.7071
rs301806	1	8482078	5.6e-11	3.09e-09	0.553916	0.0176465	1.81e-07	2.16e-07	4.27e-08	0.9298	0.007055
rs3088142	10	76854564	1.52e-10	0.00132247	0.00404364	0.305421	0.43317	5.98e-09	0.675706	0.01314	0.1295
rs3770445	2	172708919	4.45e-08	3.32e-05	0.0223659	0.313231	0.00130836	4.07e-07	0.00295743	0.798	0.04843
rs3776926	5	77328136	2.23e-08	0.0987104	0.338129	0.879908	0.000460066	5.69e-07	0.523282	0.554	0.4824
rs3777436	6	131189534	3.99e-08	0.0103239	0.422955	0.759459	1.04e-08	0.001752	0.132062	0.1147	0.7785
rs3778639	6	31093776	4.26e-12	6.65e-10	0.000689677	0.176575	5.89e-05	3.83e-07	2.24e-09	0.3203	0.02889
rs3802924	11	133827733	3.5e-10	5.15e-08	5.89e-05	2.94e-05	0.0201415	4.73e-08	0.37918	0.07277	0.5771
rs3945581	9	120516971	4.41e-09	5.83e-09	0.0402997	1.96e-05	4.64e-05	2.65e-07	0.0264791	0.3318	0.005175
rs4057	13	31906291	4.31e-13	9.1e-06	0.000512594	0.927588	0.0072142	1.82e-09	0.000243456	0.00449	0.5479
rs4129585	8	143312933	9.89e-13	0.00418105	3.86e-07	0.896377	0.0911968	6.3e-05	0.795573	0.0002481	0.002046
rs4131791	18	52747871	4.36e-17	2.81e-10	2.67e-06	0.00112965	0.194985	5.08e-14	0.00836183	0.01371	0.2663
rs4132816	13	67816735	3.91e-09	2.66e-07	0.000824194	0.037062	0.0111816	8.94e-07	0.00177248	0.001137	0.07046
rs413501	17	31556958	6.08e-10	0.0018616	0.000172199	0.856783	0.770767	2.25e-08	0.144056	0.1393	0.5136
rs4295278	4	123547541	1.7e-08	5.68e-11	0.0397561	0.00369172	0.000152612	1.06e-07	6.53e-09	0.2316	0.108
rs4341430	10	68497088	4.32e-08	1.28e-05	0.00514836	0.141247	0.0754369	2.36e-07	0.00690915	0.1882	0.03286
rs4412925	15	63905610	4.52e-10	3.78e-07	0.414002	0.0137599	0.33868	1.25e-08	0.000115194	0.05926	0.003129
rs4414202	11	28709434	2.2e-18	7.82e-07	0.0646445	0.000905375	0.512502	6.31e-10	0.189006	3.67e-10	0.1434
rs4454799	12	121317075	2.02e-10	0.0091011	0.00983193	0.281244	0.0815843	1.03e-08	0.0812891	0.155	0.1407
rs4554269	5	161313159	1.21e-08	0.00616939	0.12508	0.145165	0.30137	1.11e-08	0.867213	0.8359	0.3008
rs4589792	2	22498479	1.94e-16	2.52e-10	8.87e-07	0.0240462	0.00230376	1.57e-09	0.000118617	0.000232	0.01411
rs4632195	18	50746748	9.42e-22	9.85e-19	3.21e-06	4.42e-06	1.06e-05	6.85e-18	2.71e-08	0.0112	0.06254
rs4635171	12	24007901	3.97e-09	5.54e-06	0.00795478	0.0387077	0.00126939	1.43e-07	0.0471446	0.04934	0.0507
rs4635727	3	18705035	3.53e-10	3.48e-09	1.09e-07	0.0693029	0.00499941	1.18e-06	1.17e-05	0.1789	0.3856
rs4671360	2	60209439	1.09e-10	0.0539657	0.00168924	0.861516	0.988089	1.8e-06	0.368507	0.04297	0.0005856
rs4730347	7	78138925	4.5e-09	0.00110758	2.89e-05	0.795436	0.00845938	8.14e-06	0.253226	0.006561	0.5653
rs4890357	18	39304176	1.98e-09	5.61e-06	0.657476	0.0402662	0.00841425	7.99e-10	0.00155253	0.9862	0.09908
rs4900589	14	104146361	8.85e-14	3.45e-06	0.022239	0.000400681	0.45227	7.54e-12	0.728724	0.2165	0.01815
rs4937860	11	133814713	2.97e-08	0.0490557	0.28929	0.0140204	0.912522	0.0002243	0.0951027	5.44e-05	0.3033
rs4972656	2	175240292	9.81e-11	0.0262592	0.0298077	0.922899	0.00770963	3.23e-09	0.879199	0.03202	0.3085
rs564854	9	14065522	1.62e-08	0.00027597	0.00102187	0.901701	0.446539	8.01e-06	0.000241568	0.04135	0.7427
rs583514	3	173114167	3.37e-09	2.07e-06	0.00106507	0.0645637	0.0503951	9.25e-09	0.00684441	0.02887	0.86
rs589002	16	77104044	1.05e-11	4.9e-05	5.02e-06	0.724432	0.0249975	1.03e-06	0.0269466	0.002684	0.03402
rs6018311	20	45792634	1.14e-09	9.37e-07	0.00185386	0.00692389	0.398528	1.7e-06	0.0287199	0.0001692	0.004369
rs6072311	20	39855001	7.37e-09	3.77e-06	4.36e-07	0.091388	0.749779	2.87e-05	0.00309188	0.003418	0.8108
rs6082253	20	20932499	1.41e-09	0.00184255	6.63e-07	0.0747596	0.0049474	0.0002814	0.323649	0.1494	0.5705
rs6131010	20	44724305	5.09e-17	9.95e-12	0.00030692	0.00787981	0.000365552	3.01e-14	3.49e-06	0.06071	0.4312
rs618869	18	53248151	3.79e-16	2.28e-11	0.0898636	0.0063169	7.84e-14	1.62e-06	4.16e-08	0.002724	0.02846
rs632603	11	63876232	1.53e-09	6.62e-05	0.45099	0.0607123	0.00451694	9.15e-08	0.00387786	0.002145	0.1579
rs634180	6	64630449	3.44e-11	4.71e-07	0.0938693	0.0163675	0.0187308	7.08e-09	0.00181184	7.09e-05	0.6867
rs6416794	16	51181735	4.13e-10	0.0501894	0.00290029	0.817364	0.407266	8.04e-07	0.258452	0.02176	0.01125
rs6441850	3	44579607	4.11e-17	0.00035672	0.0356599	0.767122	0.752549	2e-12	0.0105487	7.26e-05	0.03635
rs6493198	15	46493154	3.53e-08	0.00147647	0.305109	0.896962	0.00165863	2.81e-07	0.00610827	0.08378	0.3878
rs6549392	3	71538696	3.26e-10	0.0330148	0.0175345	0.0189689	0.0642791	5.66e-06	0.00702054	0.9936	0.06525
rs6556594	5	155846059	1.55e-08	0.832573	0.00233113	0.00495463	0.0761632	2.42e-05	0.095818	0.0005174	0.6221
rs6589386	11	113443753	1.47e-09	2.32e-15	0.000299591	4.83e-06	2.8e-05	1.47e-08	2.31e-08	0.01155	0.1179
rs666845	11	83277544	4.23e-08	3.65e-06	6.89e-07	0.0425697	0.000676424	0.0002964	0.0589714	0.1814	0.09475
rs6689864	1	67068112	2.39e-08	0.00064662	0.310204	0.0125324	0.0907194	6.24e-08	0.369683	0.07256	0.3837
rs6691053	1	173868955	7.13e-10	1.27e-06	0.956898	0.0524805	0.000149836	1.11e-08	2.23e-05	0.3927	0.1221
rs6737187	2	226360417	4.1e-11	2.11e-07	0.0116311	0.159701	1.1e-06	7.09e-05	1.53e-05	0.02013	0.0004095
rs6796058	3	100944076	1.29e-08	0.22411	0.00251986	0.121256	0.0526128	9.28e-07	0.595858	0.1595	0.1291
rs6797870	3	178199837	4.26e-08	4.17e-05	0.768145	0.0396428	0.00506108	8.95e-08	0.0162122	0.1109	0.09644
rs6802567	3	43537085	7.8e-10	3.4e-06	0.00520828	0.0322452	0.684735	6.08e-08	0.00638779	0.003017	0.07131
rs6926142	6	27395764	6.69e-17	5.44e-08	0.00279799	0.597431	0.0155712	7.79e-12	2.42e-07	0.621	0.01671
rs6927072	6	152257687	4.02e-14	0.0314551	0.00101138	0.810255	0.437458	1.64e-10	0.715726	0.003718	0.7414
rs6978358	7	54531078	1.22e-10	9.14e-05	6.29e-05	0.65263	0.000635365	6.79e-05	0.0299976	0.01794	0.001606
rs7023516	9	129667804	1.44e-09	1.1e-06	0.000337747	0.155191	8.95e-05	3.86e-06	0.00126096	0.003726	0.6119
rs707125	2	157136844	5.75e-09	3.7e-06	0.940448	0.0787893	0.00163242	6.13e-08	4.86e-06	0.4632	0.1334
rs7111031	11	113377488	2.39e-21	1.09e-17	0.000601965	9.18e-05	0.00080133	2.44e-17	3.35e-11	0.0353	0.01061
rs7115165	11	112862587	2.76e-16	6.3e-16	1.15e-07	0.000272541	0.000120086	3.09e-10	1.26e-08	0.01509	0.003011
rs7119702	11	118607694	1.3e-09	0.00691681	0.700639	0.459266	0.000167365	3.14e-06	0.00484533	0.1078	0.06841
rs7120923	11	32600924	7.13e-12	3.21e-06	0.00953565	0.135963	1.78e-05	1.18e-08	0.0109172	0.7197	0.01072
rs7130064	11	13326128	2.72e-11	2.04e-05	0.000164488	0.737638	0.000775434	2.51e-05	3.76e-05	0.1474	0.007697
rs7152906	14	75125540	1.46e-13	5.9e-12	4.01e-05	3.16e-06	0.000446167	9.67e-12	0.00933424	0.08537	0.6041
rs7162423	15	74052756	2.68e-12	0.00011959	0.000328764	0.608633	0.0594337	7.1e-09	0.0670791	0.002492	0.2054
rs7175414	15	47676200	3.45e-13	0.00810282	0.507581	0.919688	8.42e-05	1.35e-09	0.314424	0.8771	0.01086
rs7216064	17	65898809	4.46e-15	1.6e-05	0.00347006	0.124957	5.81e-08	2.2e-09	0.285106	0.0263	0.879
rs7231748	18	53109035	3.2e-17	2.11e-17	6.05e-06	7.3e-11	0.000785128	1.93e-14	0.000650868	0.001413	0.5731
rs7236335	18	52475073	2.59e-19	3.57e-09	2.31e-05	0.091004	0.0193685	2.98e-13	0.000392608	0.2615	3.4e-05
rs7290458	22	41476337	7.65e-10	6.19e-09	0.00467813	1.66e-05	0.18018	9.3e-10	0.033481	0.008535	0.8643
rs7291412	22	46459132	3.84e-11	6.01e-05	0.00178874	0.0686593	0.120673	2.28e-08	0.2387	0.6257	5.95e-05
rs7295481	12	103492168	3.4e-08	0.00026591	0.00132569	0.815426	0.00323942	2.3e-06	0.0118788	0.3898	0.1509
rs7517921	1	243856420	1.46e-08	3.94e-06	0.013027	0.0815105	9.08e-05	3.27e-06	0.00651181	0.01341	0.2068
rs7551758	1	52274078	5.13e-12	1.09e-07	0.0119257	0.00762144	0.254956	8.74e-12	0.00488628	0.02116	0.3174
rs7625233	3	16852736	2.4e-12	2.1e-11	0.00254304	8.3e-05	0.000388191	1.43e-10	0.000389884	0.008464	0.02024
rs7710751	5	61504389	3.26e-19	1.34e-05	3.52e-06	0.621456	0.0969128	3.99e-13	0.128852	0.007573	0.001424
rs7729364	5	120092361	3.41e-15	0.00092843	4.94e-05	0.553685	0.000619239	2.22e-09	0.184762	0.001525	0.5488
rs7763910	6	26472655	1.16e-09	0.00131153	0.0892083	0.588083	0.00610863	1.68e-08	0.12668	0.5865	0.01831
rs7766407	6	66885658	2.95e-12	0.71382	0.00619354	0.0867269	0.0910483	1.81e-09	0.199496	0.01381	0.00363
rs780044	2	125007147	1.28e-14	2.27e-05	6.68e-06	0.196671	0.308905	4.1e-10	0.244147	0.07511	0.003309
rs7811230	7	110144415	1.88e-08	0.00702299	0.000162217	0.669053	0.00741927	0.0003197	0.945462	0.0102	0.01699
rs7856424	9	119733595	2.06e-09	0.00454552	0.227641	0.0708072	0.161198	2.26e-09	0.216832	0.4155	0.7886
rs7875257	9	11109844	1.06e-11	2.25e-06	6.55e-05	0.0341594	0.0721988	2.67e-09	0.103481	0.3972	0.0137
rs791751	1	176137178	3.28e-10	0.00061895	0.00840315	0.77421	0.111828	1.78e-07	0.00380574	0.007139	0.3486
rs7925137	11	47202946	2.38e-08	4.04e-06	0.0347753	0.253758	4.09e-06	0.0002363	1.02e-05	0.08364	0.01578
rs7940164	11	113451765	2.53e-12	2.38e-06	0.000139788	0.104311	0.00180334	9.42e-11	0.0420374	0.5091	0.5217
rs7944714	11	88830495	1.43e-11	4.2e-11	0.10989	2.35e-07	0.0439555	2.86e-10	0.00288851	0.4213	0.000143
rs7981910	13	94014625	1.03e-11	0.00327692	0.00439773	0.254652	0.143085	1.54e-08	0.0147998	0.02967	0.05086
rs8030745	15	74133091	8.23e-13	1.37e-06	0.204911	0.12036	0.012577	9.45e-12	0.00060399	0.05416	0.376
rs8043085	15	38828140	3.33e-08	5.71e-08	0.00301317	0.0155318	0.0630474	1.18e-07	0.000158755	0.01241	0.8841
rs823926	1	37748214	2.66e-08	1.61e-05	0.0134721	0.0327452	0.0254283	3.77e-07	0.0424307	0.001494	0.3323
rs827150	3	157911536	2.88e-12	1.24e-06	0.000286568	0.126977	0.010052	2.92e-09	0.0129143	0.03714	0.01349
rs875519	20	31091235	1.93e-08	0.0183905	0.0166201	0.432271	0.0198187	3.38e-06	0.168598	0.5398	0.01261
rs888242	2	51223107	1.42e-09	8.61e-10	0.0140247	0.00204984	8.53e-05	4.96e-08	3.77e-05	0.004821	0.265
rs898253	15	29852637	1.91e-08	0.0002016	0.0280606	0.00130753	0.307057	1.07e-06	0.774485	0.03768	0.05413
rs898777	11	99089028	2.74e-09	2.21e-05	1.74e-06	0.118538	0.219235	1.46e-05	0.0978354	0.0121	0.09514
rs9284879	3	44284584	2.08e-08	0.0005745	0.00216807	0.840718	0.854381	2.97e-07	0.0082856	0.1296	0.3793
rs9322279	6	101347943	1.4e-11	2.19e-09	0.254634	0.00850075	0.0334789	7.94e-10	4.97e-07	0.103	0.01679
rs9364755	6	165117329	1.23e-09	6.5e-05	0.0111441	0.12327	0.478576	1.83e-09	0.0621073	0.03041	0.4942
rs9365484	6	163155741	2.69e-12	0.00256808	0.320257	0.573533	0.392154	2.66e-08	0.0375215	3.87e-06	0.8066
rs9586	3	49213637	2.98e-21	1.22e-18	0.000249918	4.03e-05	9.18e-06	5.07e-17	2.4e-11	0.04741	0.0381
rs9651062	1	191391635	4.19e-09	0.00556419	0.0301605	0.0242852	0.819613	5.22e-07	0.343318	0.003059	0.575
rs9861713	3	61133499	3.08e-09	0.0886193	0.947744	0.182452	0.000631769	1.31e-06	0.0825858	0.9803	0.03764
rs9964679	18	26569901	2.49e-11	0.00016576	7.59e-06	0.413309	0.0113544	5.62e-07	0.312805	0.1204	0.01119

## Sheet: ST6
Supplementary Table 6. Lead SNPs for the internalizing spectrum.
CHR	SNP	BP	P	TOTAL	NSIG	S05	S01	S001	S0001	SP2
8	rs1986972	10268805	8.45e-22	572	40	6	22	33	471	rs2945251(1),rs2945249(1),rs2955587(1),rs2948305(1),rs712253(1),rs17594065(1),rs17594093(1),rs13274039(1),rs7011221(1),rs4840913(1),rs17594423(1),rs2948286(1),rs793506(1),rs7004604(1),rs1543238(1),rs793728(1),rs1401390(1),rs793510(1),rs793508(1),rs2030280(1),rs2976856(1),rs2976868(1),rs2976871(1),rs2980773(1),rs2921040(1),rs2979203(1),rs11776995(1),rs2948586(1),rs2948587(1),rs17154284(1),rs199686…
8	rs2975635	10143661	3.88e-17	31	4	0	1	1	25	rs2975680(1),rs10089339(1),rs4841312(1),rs17151675(1),rs17151684(1),rs7014570(1),rs6994060(1),rs10111917(1),rs17151713(1),rs10097184(1),rs7835507(1),rs7835960(1),rs17151728(1),rs6997224(1),rs17151741(1),rs17151745(1),rs17151763(1),rs17707988(1),rs17708090(1),rs17708276(1),rs6984111(1),rs7841921(1),rs17710558(1),rs17151969(1),rs7005230(1),rs6987571(1),rs11991832(1)
13	rs10492541	66533890	1.45e-16	73	1	1	16	2	53	rs1460655(1),rs4086584(1),rs17079605(1),rs9564290(1),rs9564291(1),rs7332806(1),rs11620211(1),rs4126979(1),rs7336304(1),rs17079768(1),rs9529002(1),rs9529003(1),rs3904003(1),rs3904004(1),rs3850029(1),rs7317658(1),rs7324085(1),rs3904009(1),rs9571520(1),rs9529004(1),rs7328824(1),rs17837226(1),rs9540616(1),rs17252270(1),rs3843944(1),rs11839567(1),rs3850030(1),rs4126982(1),rs11839037(1),rs3850031(1),rs…
17	rs17689882	43906828	1.47e-16	39	0	0	0	0	39	rs11012(1),rs17689471(1),rs17762769(1),rs8072451(1),rs4277389(1),rs4566211(1),rs17762954(1),rs1396862(1),rs17689824(1),rs17763086(1),rs1876831(1),rs16940665(1),rs17689918(1),rs16940674(1),rs1876829(1),rs183211(1),rs199438(1),rs199439(1),rs199456(1),rs7224296(1),rs199454(1),rs199448(1),rs199443(1),rs199442(1),rs199535(1),rs199529(1),rs199528(1),rs199524(1),rs199520(1),rs199514(1),rs199513(1),rs199…
8	rs6998594	8848993	5.85e-15	53	0	0	0	1	52	rs13251924(1),rs7001360(1),rs17681427(1),rs17154381(1),rs11786469(1),rs10110074(1),rs10113481(1),rs11784987(1),rs7812973(1),rs17154405(1),rs11780672(1),rs11776981(1),rs11780486(1),rs11783707(1),rs11781985(1),rs11777742(1),rs11777908(1),rs11783944(1),rs4840356(1),rs17154702(1),rs12155530(1),rs11779524(1),rs17154709(1),rs506386(1),rs656070(1),rs612246(1),rs2427(1),rs11906(1),rs10093872(1),rs7838012…
5	rs16903275	87950543	2.11e-14	26	0	4	5	2	15	rs1501673(1),rs1501672(1),rs6893807(1),rs3814424(1),rs2161228(1),rs639725(1),rs12655172(1),rs34316(1),rs13170975(1),rs34320(1),rs187270(1),rs34318(1),rs10514302(1),rs13158247(1),rs16903320(1),rs1422189(1),rs16903340(1),rs17558396(1),rs17487515(1),rs4518438(1),rs12054920(1),rs216057(1)
2	rs6545677	58211509	6.11e-14	71	5	18	5	5	38	rs2695616(1),rs13026414(1),rs2871780(1),rs11125728(1),rs11885093(1),rs11682175(1),rs13026830(1),rs2312143(1),rs2717019(1),rs2717023(1),rs2717025(1),rs2717026(1),rs2678889(1),rs2717029(1),rs2717030(1),rs970941(1),rs2717031(1),rs2717038(1),rs2717039(1),rs2717040(1),rs1568253(1),rs1518401(1),rs6719889(1),rs6713551(1),rs12620940(1),rs1051061(1),rs1016771(1),rs13011711(1),rs11125742(1),rs17049378(1),r…
18	rs2958171	53072832	6.61e-13	17	5	0	0	0	12	rs2156052(1),rs1942261(1),rs8086892(1),rs1261073(1),rs13381800(1),rs1893431(1),rs1893430(1),rs1942264(1),rs1539950(1),rs1539951(1),rs1440473(1),rs2919451(1)
8	rs4841234	9683297	8.91e-13	80	0	11	14	21	34	rs7013369(1),rs13265363(1),rs13270240(1),rs10093972(1),rs4551359(1),rs5002815(1),rs11774818(1),rs4841186(1),rs4840432(1),rs4535743(1),rs11994018(1),rs11991547(1),rs7839648(1),rs4128324(1),rs11780274(1),rs13250838(1),rs4570159(1),rs6985140(1),rs12056794(1),rs12056942(1),rs13259379(1),rs4289816(1),rs11988208(1),rs11995167(1),rs6995292(1),rs6987259(1),rs6986755(1),rs7010154(1),rs4841215(1),rs1178573…
9	rs16909898	98231008	2.08e-12	11	3	0	3	2	3	rs357560(1),rs2282043(1),rs2282041(1),rs10512248(1),rs4448343(1),rs2405060(1),rs10981328(1),rs7862599(1)
8	rs13248096	8577476	5.66e-12	20	0	1	1	0	18	rs11249877(1),rs11995449(1),rs1060106(1),rs11249884(1),rs11249885(1),rs11786125(1),rs11249890(1),rs13267501(1),rs10110591(1),rs9329165(1),rs9329166(1),rs10088439(1),rs4841017(1),rs13256369(1),rs777705(1),rs570364(1),rs570396(1),rs571130(1),rs559534(1)
8	rs11786474	8605492	1.43e-11	35	0	1	3	6	25	rs2979234(1),rs6991227(1),rs17669632(1),rs17607697(1),rs7826228(1),rs7015940(1),rs12678590(1),rs7834851(1),rs7828189(1),rs1996865(1),rs12675028(1),rs6986287(1),rs6981638(1),rs6601729(1),rs4841030(1),rs11774744(1),rs11776513(1),rs11775821(1),rs11776546(1),rs1814796(1),rs565169(1),rs10094026(1),rs17154743(1),rs964773(1),rs11774860(1),rs11985640(1),rs2409090(1),rs3748143(1),rs3748142(1),rs7831224(1)…
18	rs1427027	35246322	1.44e-11	74	0	3	1	0	70	rs948540(1),rs7506371(1),rs11661422(1),rs11082016(1),rs8090323(1),rs1365661(1),rs2162440(1),rs2861296(1),rs7235755(1),rs11872381(1),rs2861297(1),rs9960860(1),rs12458189(1),rs1346281(1),rs12373413(1),rs11082017(1),rs11082018(1),rs9961687(1),rs9950896(1),rs9961877(1),rs17570856(1),rs875075(1),rs16969178(1),rs9945536(1),rs890544(1),rs17671611(1),rs9952499(1),rs1427028(1),rs1427029(1),rs1427030(1),rs…
11	rs4440995	31838128	1.67e-11	10	0	0	0	0	10	rs12421026(1),rs3026390(1),rs628224(1),rs3026354(1),rs7942007(1),rs1540318(1),rs1806154(1),rs1805270(1),rs1806152(1),rs11031484(1)
14	rs4903249	75083881	1.99e-11	51	22	10	0	4	15	rs7150659(1),rs754458(1),rs989909(1),rs989910(1),rs754634(1),rs8017803(1),rs752857(1),rs6574190(1),rs8004430(1),rs10144860(1),rs2058918(1),rs2359239(1),rs722599(1),rs12147862(1),rs2286913(1),rs6574201(1),rs7156590(1),rs11159109(1),rs2159906(1)
6	rs11155596	101152631	2.53e-11	171	1	9	46	14	101	rs241816(1),rs241819(1),rs4840132(1),rs7773661(1),rs12206564(1),rs12193960(1),rs12207086(1),rs6905221(1),rs6938440(1),rs2036052(1),rs12209887(1),rs6904959(1),rs1039031(1),rs1039032(1),rs11155606(1),rs10872622(1),rs7748644(1),rs13208757(1),rs6909880(1),rs11967951(1),rs6570970(1),rs6919283(1),rs723743(1),rs9322216(1),rs705589(1),rs846781(1),rs10485296(1),rs861752(1),rs846784(1),rs846785(1),rs657097…
8	rs7014291	10937008	3.23e-11	11	1	0	1	0	9	rs17152795(1),rs17152797(1),rs10104571(1),rs7838051(1),rs10096332(1),rs7016760(1),rs10091993(1),rs2898258(1),rs6999969(1),rs11986748(1)
12	rs10850379	110002777	4.92e-11	120	3	11	11	9	86	rs10744780(1),rs7964706(1),rs10850086(1),rs983307(1),rs10850090(1),rs7307504(1),rs1004627(1),rs11066471(1),rs12821085(1),rs6606707(1),rs7976839(1),rs7958220(1),rs7300290(1),rs6606708(1),rs11611358(1),rs7958071(1),rs7974872(1),rs4766470(1),rs10850131(1),rs12581071(1),rs11066498(1),rs9943753(1),rs11066503(1),rs4766594(1),rs11066523(1),rs930356(1),rs2075439(1),rs10774692(1),rs7970482(1),rs10850135(1…
22	rs1535048	41684093	5.14e-11	136	11	6	9	45	65	rs7287939(1),rs4821987(1),rs4821992(1),rs4822004(1),rs9611497(1),rs738631(1),rs2144342(1),rs7510675(1),rs4820431(1),rs1033611(1),rs5751058(1),rs2038209(1),rs139434(1),rs139457(1),rs139461(1),rs139468(1),rs139477(1),rs139483(1),rs139484(1),rs139485(1),rs139492(1),rs139509(1),rs139516(1),rs139531(1),rs9611542(1),rs6002333(1),rs3927(1),rs4822021(1),rs9538(1),rs4820438(1),rs9611571(1),rs4822027(1),rs…
2	rs7595938	148840271	7.87e-11	169	61	9	19	16	64	rs7568976(1),rs7557000(1),rs7596180(1),rs7557741(1),rs11679403(1),rs2049741(1),rs6430224(1),rs7590158(1),rs4662290(1),rs4662539(1),rs12053111(1),rs10754922(1),rs13394781(1),rs1547596(1),rs1528838(1),rs6711640(1),rs10210652(1),rs6735022(1),rs7584099(1),rs4662545(1),rs17678220(1),rs1881570(1),rs12616680(1),rs11686893(1),rs1406449(1),rs4502361(1),rs10928364(1),rs4641882(1),rs11687308(1),rs1528844(1)…
10	rs7358201	68551569	1.04e-10	28	6	3	3	5	11	rs2394298(1),rs12356854(1),rs12357998(1),rs12774061(1),rs7083773(1),rs10762101(1),rs10822906(1),rs7092601(1),rs7092856(1),rs4433471(1),rs10733827(1),rs4339932(1),rs4387244(1),rs6480212(1),rs6480213(1),rs4472822(1),rs9414946(1),rs9415865(1),rs9414948(1)
3	rs6795772	49365269	1.12e-10	155	68	6	1	0	80	rs4858819(1),rs730566(1),rs4858828(1),rs4858798(1),rs12493578(1),rs4858830(1),rs4858831(1),rs12497850(1),rs9882443(1),rs4858800(1),rs1352420(1),rs10865953(1),rs6442130(1),rs6796790(1),rs6791542(1),rs3774628(1),rs6766238(1),rs7627404(1),rs9859473(1),rs9876848(1),rs9311430(1),rs9879978(1),rs9682444(1),rs9835307(1),rs9311433(1),rs9755490(1),rs9284885(1),rs7430501(1),rs10780033(1),rs9840684(1),rs4974…
1	rs977747	47684677	1.39e-10	33	27	3	1	0	2	rs13373881(1),rs2249636(1),rs12083555(1)
11	rs4444109	112854309	2.09e-10	41	10	4	7	5	15	rs11214440(1),rs10789932(1),rs17583142(1),rs11214444(1),rs1892979(1),rs11214447(1),rs11214457(1),rs17114682(1),rs11214459(1),rs11214463(1),rs7941072(1),rs12574688(1),rs10891496(1),rs10891498(1),rs2509377(1),rs7951034(1),rs12789616(1),rs1816537(1),rs10891504(1),rs10891505(1),rs873803(1),rs10891509(1),rs17509332(1),rs10891510(1),rs17114979(1),rs1369814(1),rs17595156(1)
8	rs922052	9371789	2.73e-10	13	1	3	2	0	7	rs6986685(1),rs12235038(1),rs2085641(1),rs13252324(1),rs7829154(1),rs1458939(1),rs7839849(1),rs10503381(1),rs17151193(1)
20	rs6074015	44712175	2.97e-10	36	15	0	0	0	21	rs6073993(1),rs3746515(1),rs1537028(1),rs2903908(1),rs3092502(1),rs3091794(1),rs3092169(1),rs2868764(1),rs6017734(1),rs6131012(1),rs6065924(1),rs6104466(1),rs6065925(1),rs6131015(1),rs1009373(1),rs13040307(1),rs6074024(1),rs1800686(1),rs752118(1),rs1535045(1),rs3765459(1)
11	rs12222458	113417603	3.27e-10	7	0	0	0	0	7	rs4421776(1),rs4611239(1),rs4938022(1),rs4503578(1),rs12361261(1),rs4466875(1),rs7131411(1)
8	rs1077951	8758058	3.33e-10	4	3	0	1	0	0	rs17155242(1)
11	rs2075654	113289066	4.59e-10	10	0	0	0	0	10	rs719802(1),rs7118900(1),rs11214599(1),rs11214601(1),rs2511520(1),rs1124491(1),rs1079595(1),rs1079594(1),rs1076560(1),rs2283265(1)
8	rs4841132	9183596	5.99e-10	22	2	4	0	0	16	rs9987289(1),rs4841133(1),rs4240624(1),rs6601299(1),rs2126259(1),rs1461729(1),rs13265179(1),rs2054345(1),rs4332138(1),rs11782386(1),rs11779870(1),rs7357361(1),rs11783641(1),rs7008413(1),rs12546198(1),rs7846549(1)
11	rs11039182	47346723	6.21e-10	96	10	17	9	15	45	rs3740976(1),rs8914(1),rs7932354(1),rs10769205(1),rs6485690(1),rs6485696(1),rs6485702(1),rs7125807(1),rs7101470(1),rs10838651(1),rs7103581(1),rs11039074(1),rs7946709(1),rs4752957(1),rs11039097(1),rs6485739(1),rs10838660(1),rs1872896(1),rs7121418(1),rs4752967(1),rs11039112(1),rs12224096(1),rs752849(1),rs747650(1),rs1060573(1),rs7130989(1),rs3740691(1),rs11600668(1),rs11039119(1),rs4752971(1),rs119…
16	rs8062719	31002664	6.31e-10	94	23	14	21	11	25	rs7186852(1),rs7188789(1),rs7197475(1),rs7204632(1),rs7187071(1),rs11642466(1),rs11642862(1),rs11645175(1),rs8058961(1),rs8046001(1),rs12926237(1),rs9932572(1),rs11150596(1),rs4889630(1),rs4889651(1),rs4889653(1),rs9319588(1),rs3813020(1),rs8050588(1),rs10782001(1),rs10782002(1),rs7200879(1),rs1458202(1),rs4889599(1),rs2305884(1),rs11150601(1),rs897986(1),rs4889603(1),rs4889525(1),rs11076(1),rs99…
11	rs3862368	88529474	9.85e-10	144	34	0	22	6	82	rs308870(1),rs16914045(1),rs17827739(1),rs728905(1),rs12287174(1),rs4002790(1),rs3862361(1),rs3850940(1),rs16914095(1),rs3812729(1),rs308884(1),rs11020168(1),rs16914126(1),rs16914129(1),rs12273907(1),rs1552739(1),rs973716(1),rs11826393(1),rs1875797(1),rs11826538(1),rs4753106(1),rs4753505(1),rs10501668(1),rs11828996(1),rs10501670(1),rs1504088(1),rs3337(1),rs7942741(1),rs1491891(1),rs1504093(1),rs1…
5	rs10866759	93150312	1.13e-09	55	0	0	0	0	55	rs17083297(1),rs1038686(1),rs9314086(1),rs10041792(1),rs6890998(1),rs10071040(1),rs6877616(1),rs17083315(1),rs10476520(1),rs6895356(1),rs10050364(1),rs7702649(1),rs7702348(1),rs6898507(1),rs7729237(1),rs7723944(1),rs6881815(1),rs7730993(1),rs2119449(1),rs17083337(1),rs10066088(1),rs6879620(1),rs2344918(1),rs6556834(1),rs7713956(1),rs7715555(1),rs9314089(1),rs2924374(1),rs1453003(1),rs2924375(1),r…
11	rs174549	61571382	1.96e-09	33	1	2	4	4	22	rs174528(1),rs108499(1),rs174532(1),rs174534(1),rs174535(1),rs174536(1),rs174537(1),rs102275(1),rs174538(1),rs4246215(1),rs174541(1),rs174546(1),rs174547(1),rs174550(1),rs174555(1),rs174556(1),rs968567(1),rs1535(1),rs174574(1),rs174576(1),rs174577(1),rs174579(1),rs174583(1),rs174593(1),rs174601(1),rs174605(1),rs174616(1),rs174627(1),rs1000778(1),rs174464(1)
8	rs4425722	92668754	2.39e-09	32	3	4	2	6	17	rs13248522(1),rs4543502(1),rs921235(1),rs10109254(1),rs2657196(1),rs2657197(1),rs843094(1),rs1505222(1),rs4129243(1),rs7839679(1),rs11985424(1),rs7819525(1),rs6471291(1),rs4484646(1),rs10101621(1),rs4734795(1),rs12545507(1),rs4282524(1),rs13255450(1),rs9297898(1),rs7829949(1),rs13258512(1),rs9643325(1),rs9297900(1),rs12681007(1)
11	rs7942486	13288698	2.49e-09	71	11	1	21	22	16	rs10500775(1),rs4757126(1),rs1481890(1),rs12788850(1),rs12417994(1),rs12419516(1),rs1384014(1),rs1351522(1),rs1351520(1),rs4757133(1),rs1481881(1),rs1481880(1),rs10832006(1),rs11825506(1),rs11605518(1),rs11022721(1),rs1481877(1),rs10766064(1),rs10766065(1),rs10766066(1),rs4756763(1),rs11022733(1),rs998089(1),rs2403661(1),rs10832012(1),rs900147(1),rs900145(1),rs11022742(1),rs4757138(1),rs2279287(1…
12	rs10850805	117695594	2.89e-09	42	0	4	20	16	2	rs1472522(1),rs1344250(1),rs12322298(1),rs2221165(1),rs7959489(1),rs7298778(1),rs10850776(1),rs11068377(1),rs2279765(1),rs2279766(1),rs10850777(1),rs7300763(1),rs2036311(1),rs7315039(1),rs2270791(1),rs12368232(1),rs11068384(1),rs12302515(1),rs868757(1),rs3817015(1),rs10850789(1),rs11068387(1),rs10161283(1),rs10161089(1),rs10850791(1),rs2133678(1),rs10850794(1),rs10850795(1),rs2036312(1),rs4766834…
12	rs753044	74489288	3.24e-09	200	27	43	29	12	89	rs10219695(1),rs2028682(1),rs10879636(1),rs1373221(1),rs974960(1),rs11608269(1),rs17814521(1),rs1584058(1),rs17814881(1),rs1899686(1),rs17815037(1),rs12818629(1),rs11179738(1),rs735264(1),rs7970034(1),rs7973710(1),rs12311804(1),rs1595790(1),rs12307646(1),rs11179746(1),rs10879664(1),rs1009993(1),rs12367613(1),rs1439985(1),rs7959935(1),rs7138509(1),rs7138284(1),rs7296704(1),rs1439984(1),rs1371576(1…
5	rs7349809	152096727	3.32e-09	126	3	1	49	54	19	rs17451455(1),rs4958550(1),rs4075629(1),rs4361504(1),rs17548854(1),rs13436634(1),rs4958553(1),rs4958554(1),rs4958555(1),rs12659160(1),rs4246030(1),rs6868942(1),rs4407620(1),rs4475248(1),rs4569857(1),rs17549307(1),rs4958559(1),rs2961747(1),rs12654265(1),rs2964249(1),rs2961745(1),rs17549488(1),rs2961741(1),rs10036750(1),rs10045463(1),rs6876403(1),rs6876723(1),rs4958560(1),rs2964231(1),rs4958561(1),…
7	rs12535416	109133140	3.6e-09	22	2	0	0	10	10	rs7802318(1),rs12154407(1),rs11765085(1),rs7787624(1),rs7793029(1),rs12537844(1),rs10499975(1),rs1358545(1),rs1881447(1),rs1881448(1),rs17364497(1),rs12533306(1),rs1880233(1),rs2396114(1),rs6960338(1),rs6951122(1),rs9655803(1),rs11771274(1),rs17462362(1),rs1721447(1)
9	rs9298995	4145340	3.82e-09	17	0	0	1	8	8	rs10974337(1),rs4741891(1),rs7026695(1),rs7856371(1),rs12345723(1),rs12345823(1),rs6476807(1),rs806059(1),rs12683045(1),rs17209669(1),rs10814852(1),rs13299873(1),rs13299289(1),rs6476808(1),rs7850510(1),rs10758560(1),rs10974389(1)
3	rs9868600	16847424	4.2e-09	97	5	16	22	11	43	rs17042606(1),rs10510460(1),rs13066132(1),rs7634863(1),rs11711008(1),rs11928177(1),rs4684295(1),rs13322151(1),rs4128498(1),rs12107299(1),rs9829793(1),rs13073517(1),rs17272677(1),rs7616121(1),rs6784278(1),rs6806739(1),rs17042742(1),rs1449528(1),rs6442641(1),rs7645840(1),rs6442642(1),rs7627384(1),rs17042747(1),rs1449532(1),rs1449531(1),rs11920169(1),rs11916127(1),rs6800488(1),rs10510465(1),rs468430…
5	rs1566032	92398402	4.77e-09	25	0	0	0	1	24	rs13183986(1),rs6861722(1),rs13181580(1),rs4869409(1),rs4869410(1),rs17082892(1),rs1496335(1),rs12656521(1),rs17082905(1),rs1496333(1),rs1353494(1),rs13188341(1),rs1353492(1),rs13163742(1),rs4485910(1),rs4502796(1),rs4309956(1),rs10463226(1),rs13185751(1),rs10514372(1),rs4380634(1),rs7442897(1),rs12652645(1),rs4869419(1),rs4380635(1)
15	rs17652674	38900312	5.01e-09	31	0	0	2	4	25	rs11073332(1),rs11855910(1),rs8032939(1),rs12593201(1),rs7173565(1),rs12324161(1),rs11073338(1),rs11858911(1),rs13329072(1),rs17651741(1),rs11636580(1),rs11073340(1),rs1495184(1),rs12912299(1),rs16967104(1),rs17574546(1),rs16967112(1),rs924005(1),rs7171171(1),rs7173588(1),rs883625(1),rs16967120(1),rs17653133(1),rs17575006(1),rs17575173(1),rs7173718(1),rs8024280(1),rs17653420(1),rs17575571(1),rs17…
6	rs6928084	142965039	5.56e-09	63	0	28	6	12	17	rs1098067(1),rs9390007(1),rs9484654(1),rs9484655(1),rs263161(1),rs13217677(1),rs187809(1),rs9390009(1),rs9390011(1),rs1417359(1),rs263125(1),rs9496423(1),rs9373355(1),rs263152(1),rs185523(1),rs263146(1),rs263142(1),rs6909340(1),rs6570520(1),rs1770771(1),rs9496432(1),rs2202900(1),rs6902754(1),rs9496434(1),rs7757435(1),rs9376702(1),rs7760316(1),rs6914176(1),rs6936988(1),rs9484661(1),rs7739444(1),rs…
9	rs10759941	120515669	5.93e-09	71	10	2	27	5	27	rs532742(1),rs4837402(1),rs716570(1),rs7870814(1),rs7860332(1),rs10818076(1),rs10818079(1),rs7350246(1),rs10818080(1),rs10818081(1),rs10818083(1),rs756136(1),rs756135(1),rs943840(1),rs7846760(1),rs7860993(1),rs10759939(1),rs10739498(1),rs10818084(1),rs4837502(1),rs1927897(1),rs4259480(1),rs7026522(1),rs1927894(1),rs1927893(1),rs1927892(1),rs10983776(1),rs10759943(1),rs1475546(1),rs10983783(1),rs1…
11	rs297367	16329009	6.28e-09	51	16	1	0	0	34	rs10832571(1),rs1837096(1),rs11822790(1),rs1829417(1),rs1595373(1),rs10741693(1),rs4628642(1),rs10832573(1),rs11023890(1),rs11023893(1),rs7949077(1),rs7952254(1),rs10430890(1),rs2351962(1),rs10766314(1),rs991612(1),rs2164785(1),rs2164784(1),rs10734239(1),rs10832579(1),rs10766315(1),rs962095(1),rs1347677(1),rs16932862(1),rs10832584(1),rs997506(1),rs4757391(1),rs1156725(1),rs12800659(1),rs1155685(1…
18	rs4801141	52801902	7.09e-09	4	4	0	0	0	0	NONE
18	rs719953	50138130	7.59e-09	4	4	0	0	0	0	NONE
10	rs2031142	10846404	7.95e-09	4	2	2	0	0	0	NONE
2	rs7597593	185533580	8.54e-09	103	46	13	19	1	24	rs12620876(1),rs1593662(1),rs17430153(1),rs4592808(1),rs4389295(1),rs12618211(1),rs1978573(1),rs11888068(1),rs10497655(1),rs1427150(1),rs7557843(1),rs17508905(1),rs17509003(1),rs17430952(1),rs17430973(1),rs2170203(1),rs17431153(1),rs10497657(1),rs10497659(1),rs10497660(1),rs17431258(1),rs3931790(1),rs1344707(1),rs7590852(1),rs1366840(1),rs10497661(1),rs4666994(1),rs4666995(1),rs7594906(1),rs72561…
16	rs10500326	4918326	8.74e-09	34	5	1	3	12	13	rs12932724(1),rs7201715(1),rs759991(1),rs741695(1),rs3827527(1),rs17137303(1),rs17832589(1),rs13333419(1),rs7186281(1),rs7194897(1),rs12444795(1),rs17137318(1),rs3747614(1),rs17770918(1),rs7185773(1),rs7186159(1),rs17137352(1),rs8055703(1),rs17771245(1),rs2660228(1),rs2660229(1),rs7214(1),rs17137389(1),rs1049208(1),rs2075637(1),rs8060738(1),rs1049205(1),rs12921187(1)
18	rs356926	26329054	8.88e-09	126	0	1	21	47	57	rs17749446(1),rs12607577(1),rs7228259(1),rs17749690(1),rs17677085(1),rs16944898(1),rs17677474(1),rs1910557(1),rs17677802(1),rs16944974(1),rs16944981(1),rs11662755(1),rs8083405(1),rs16945065(1),rs7244544(1),rs10502511(1),rs1354420(1),rs2068732(1),rs1692516(1),rs1496485(1),rs1390692(1),rs1692522(1),rs1785765(1),rs16945100(1),rs356865(1),rs356877(1),rs356825(1),rs1685060(1),rs579991(1),rs526891(1),r…
13	rs12864890	99126457	8.89e-09	34	8	0	1	21	4	rs9168(1),rs3742137(1),rs3742136(1),rs7988959(1),rs6956(1),rs2031239(1),rs17574378(1),rs3803253(1),rs7988345(1),rs9584854(1),rs9584855(1),rs745639(1),rs4294654(1),rs7339274(1),rs7334078(1),rs9517320(1),rs9584856(1),rs4411372(1),rs17471107(1),rs4772094(1),rs4491365(1),rs11839442(1),rs11841352(1),rs16955624(1),rs11841757(1),rs7330774(1)
18	rs1393330	51016370	1.13e-08	113	20	1	10	2	80	rs2116378(1),rs12957268(1),rs9950718(1),rs10853623(1),rs10853624(1),rs10502951(1),rs1006264(1),rs1573411(1),rs9783901(1),rs4998815(1),rs9950907(1),rs1541287(1),rs12968712(1),rs1943096(1),rs1943097(1),rs12607356(1),rs12605899(1),rs1943121(1),rs1943122(1),rs1943124(1),rs8097919(1),rs2276204(1),rs1943126(1),rs2298655(1),rs2298654(1),rs3819136(1),rs8096807(1),rs8097335(1),rs8084200(1),rs11659774(1),r…
8	rs2979201	8343716	1.16e-08	4	0	0	0	0	4	rs2979189(1),rs2979207(1),rs2980747(1),rs2001828(1)
1	rs10779704	8693537	1.23e-08	107	31	6	0	8	62	rs11121152(1),rs2120461(1),rs2661863(1),rs301789(1),rs302714(1),rs11121182(1),rs12080583(1),rs11589090(1),rs4908760(1),rs751790(1),rs1922983(1),rs6577488(1),rs6577489(1),rs7551849(1),rs12568293(1),rs12046643(1),rs10864354(1),rs4908761(1),rs7530745(1),rs11584261(1),rs11121194(1),rs6577491(1),rs6678982(1),rs6656249(1),rs6577496(1),rs2144463(1),rs12131864(1),rs10492966(1),rs10492965(1),rs6702060(1),…
8	rs6469450	114179599	1.25e-08	83	19	8	8	19	29	rs13271162(1),rs10097818(1),rs16884058(1),rs231302(1),rs1532798(1),rs979896(1),rs7464518(1),rs2219898(1),rs16892653(1),rs10955658(1),rs9643080(1),rs9642822(1),rs1513526(1),rs12548037(1),rs6987567(1),rs12545448(1),rs12545433(1),rs4520191(1),rs12680782(1),rs9297496(1),rs10505205(1),rs10091527(1),rs7464755(1),rs16884840(1),rs4242555(1),rs4876516(1),rs7826889(1),rs10107219(1),rs1348382(1),rs10088331(…
11	rs606561	99497874	1.58e-08	131	9	12	20	9	81	rs10790771(1),rs1494470(1),rs2047166(1),rs10790799(1),rs7936887(1),rs1494475(1),rs1790268(1),rs657807(1),rs2466891(1),rs12806022(1),rs648519(1),rs612317(1),rs12792999(1),rs17603978(1),rs673561(1),rs11220657(1),rs670897(1),rs12789908(1),rs12790322(1),rs591920(1),rs668276(1),rs12792468(1),rs10501921(1),rs2458164(1),rs653186(1),rs637387(1),rs636073(1),rs651048(1),rs651496(1),rs1790261(1),rs1690819(1…
2	rs343969	44956905	1.68e-08	18	0	0	2	2	14	rs786180(1),rs343962(1),rs343960(1),rs343956(1),rs343938(1),rs343968(1),rs343971(1),rs343972(1),rs343973(1),rs343964(1),rs343950(1),rs343945(1),rs343944(1),rs343936(1),rs343954(1),rs343952(1),rs874543(1),rs737448(1)
8	rs7350124	10625045	1.72e-08	62	28	1	5	14	14	rs7827623(1),rs13275541(1),rs11996321(1),rs10110723(1),rs720081(1),rs4841440(1),rs12750(1),rs891558(1),rs7350075(1),rs17774023(1),rs10503412(1),rs17774398(1),rs11783803(1),rs17152412(1),rs10503410(1),rs11998382(1),rs4841449(1),rs11774457(1),rs11779336(1),rs17776497(1),rs17152542(1),rs2409654(1),rs17152623(1),rs4841455(1),rs11787390(1),rs17721866(1),rs12156345(1),rs4841458(1),rs11776368(1),rs13248…
7	rs2715152	82457666	1.78e-08	62	16	2	2	18	24	rs1476547(1),rs1157530(1),rs2074400(1),rs17283419(1),rs7804652(1),rs7792340(1),rs10231679(1),rs7806943(1),rs6955428(1),rs2051791(1),rs2522834(1),rs2715156(1),rs13237603(1),rs13224221(1),rs10954694(1),rs10243189(1),rs7781142(1),rs6467915(1),rs6467917(1),rs6467919(1),rs6467922(1),rs1034780(1),rs976714(1),rs10954696(1),rs10487648(1),rs999435(1),rs1001594(1),rs12113820(1),rs41583(1),rs41584(1),rs4158…
14	rs8018400	103901085	1.79e-08	77	1	25	20	4	27	rs6575979(1),rs8013228(1),rs11621300(1),rs8016326(1),rs3759577(1),rs1989565(1),rs2010281(1),rs6575982(1),rs7149767(1),rs12879085(1),rs6575984(1),rs4906320(1),rs12898029(1),rs4906321(1),rs7148567(1),rs11623869(1),rs10144051(1),rs7152202(1),rs7158144(1),rs7158822(1),rs1028613(1),rs10148970(1),rs8015723(1),rs6575988(1),rs8016676(1),rs7156036(1),rs1013650(1),rs17101620(1),rs10141120(1),rs2273700(1),r…
14	rs1235	47309496	1.84e-08	93	48	41	0	1	3	rs1491905(1),rs12891988(1),rs2933192(1),rs12883384(1)
6	rs844584	147964120	1.88e-08	60	3	0	5	9	43	rs702347(1),rs702351(1),rs844589(1),rs7774570(1),rs844562(1),rs844563(1),rs7745415(1),rs844568(1),rs844569(1),rs844571(1),rs844572(1),rs844573(1),rs844574(1),rs9885804(1),rs12204941(1),rs844607(1),rs844606(1),rs844604(1),rs9377061(1),rs12208201(1),rs2050185(1),rs9497822(1),rs12197416(1),rs10872599(1),rs9497823(1),rs9497824(1),rs11155509(1),rs10872600(1),rs11155510(1),rs12662594(1),rs7756592(1),rs…
14	rs12887044	75255659	1.98e-08	77	61	3	6	0	7	rs17102847(1),rs929579(1),rs11851433(1),rs2300599(1),rs17093914(1),rs731952(1),rs3742783(1),rs722685(1),rs2286912(1),rs2286914(1),rs7141835(1),rs880947(1),rs880949(1)
11	rs2758705	29784830	1.99e-08	35	2	3	7	7	16	rs697311(1),rs162011(1),rs324292(1),rs324293(1),rs56132(1),rs1341990(1),rs326740(1),rs162014(1),rs324308(1),rs178732(1),rs2571355(1),rs11030790(1),rs322614(1),rs4923610(1),rs11030797(1),rs1946665(1),rs9300004(1),rs2680291(1),rs11030800(1),rs10835566(1),rs10835567(1),rs10835568(1),rs10835571(1),rs12361299(1),rs16919818(1),rs12290129(1),rs10835584(1),rs11030826(1),rs11030828(1),rs12293643(1)
3	rs1381763	147791697	2.08e-08	0	0	0	0	0	0	NONE
4	rs4698408	15659048	2.22e-08	47	14	1	2	10	20	rs11722737(1),rs11728225(1),rs11728800(1),rs12500458(1),rs1861048(1),rs6810461(1),rs13131700(1),rs9998686(1),rs2080176(1),rs2080177(1),rs4140934(1),rs2160043(1),rs1558572(1),rs1125378(1),rs6812708(1),rs2160044(1),rs16892152(1),rs7665390(1),rs7661102(1),rs10008376(1),rs10008975(1),rs7438356(1),rs6414765(1),rs4557256(1),rs12645849(1),rs4698402(1),rs10022610(1),rs13133213(1),rs872678(1),rs4235379(1)…
13	rs3812860	67804232	2.27e-08	22	2	0	5	4	11	rs7332095(1),rs9317651(1),rs7334490(1),rs2031864(1),rs7318837(1),rs9317652(1),rs2325025(1),rs1015870(1),rs2325027(1),rs9571740(1),rs3812858(1),rs9317658(1),rs9599206(1),rs9541040(1),rs1409033(1),rs17520885(1),rs4369525(1),rs4354805(1),rs9599208(1),rs2985928(1)
9	rs610116	129655445	2.32e-08	74	23	24	11	7	9	rs13293831(1),rs503987(1),rs537717(1),rs567909(1),rs4837123(1),rs11790388(1),rs1123684(1),rs2025955(1),rs2417046(1),rs2031852(1),rs10819263(1),rs7864425(1),rs10987551(1),rs10987553(1),rs2789514(1),rs2789517(1),rs1766231(1),rs2789512(1),rs13298677(1),rs1281167(1),rs7045790(1),rs7045289(1),rs3739554(1),rs3780326(1),rs2151272(1),rs10513480(1),rs17378510(1)
4	rs6818081	176840816	2.37e-08	9	3	3	0	1	2	rs2333326(1),rs1106568(1),rs6846161(1)
11	rs10768418	38832622	2.46e-08	100	2	9	27	13	49	rs12806812(1),rs4756436(1),rs10501197(1),rs10768378(1),rs11034713(1),rs11034715(1),rs11601949(1),rs17620842(1),rs11034720(1),rs11034723(1),rs17694214(1),rs17621211(1),rs4271366(1),rs4290204(1),rs11034724(1),rs12787240(1),rs17621402(1),rs17621470(1),rs1550063(1),rs1435161(1),rs1435160(1),rs1897938(1),rs2861193(1),rs2861198(1),rs7928602(1),rs10837001(1),rs965774(1),rs10837011(1),rs11034859(1),rs155…
22	rs9608071	23408118	2.49e-08	70	22	26	13	0	9	rs915613(1),rs2013551(1),rs877728(1),rs765744(1),rs9612188(1),rs13053230(1),rs11913797(1),rs6003445(1),rs7286099(1),rs7286409(1),rs5996454(1),rs5996455(1),rs6003482(1),rs6003483(1),rs6003484(1),rs2078726(1),rs2078728(1),rs9612225(1),rs13054331(1),rs2283804(1),rs2267006(1),rs9612248(1)
7	rs7810841	21533758	2.73e-08	12	0	1	0	8	3	rs12668354(1),rs7811417(1),rs10269582(1),rs4722042(1),rs10499535(1),rs13239132(1),rs7809261(1),rs12531543(1),rs11769118(1),rs9639389(1),rs12700291(1)
6	rs11751469	33804547	3.1e-08	16	1	2	3	5	5	rs626156(1),rs542441(1),rs6919321(1),rs12198383(1),rs9394169(1),rs12192087(1),rs11751591(1),rs11752353(1),rs6901216(1),rs4713692(1),rs12209375(1),rs6905353(1),rs11753213(1)
16	rs1362376	52291939	3.46e-08	19	1	0	1	1	16	rs12149541(1),rs1420202(1),rs12921318(1),rs12932608(1),rs11076444(1),rs3859116(1),rs11076446(1),rs12917646(1),rs12934095(1),rs1080490(1),rs1080489(1),rs12930272(1),rs16950964(1),rs1420210(1),rs1345317(1),rs12930844(1),rs10521261(1),rs12599310(1)
11	rs7942392	113191428	3.54e-08	11	3	0	4	3	1	rs4255568(1),rs4559717(1),rs12787488(1),rs11214566(1),rs7931868(1),rs12279103(1),rs7114285(1),rs6589371(1)
13	rs9599129	67251108	3.57e-08	1	0	0	0	0	1	rs9592482(1)
20	rs1883833	44765458	4.12e-08	8	3	3	0	0	2	rs6131014(1),rs4812997(1)
9	rs1335462	11427570	4.27e-08	154	34	37	24	27	32	rs10959567(1),rs1335445(1),rs10123397(1),rs10959764(1),rs1335469(1),rs1335467(1),rs9407479(1),rs9407480(1),rs1335465(1),rs4364730(1),rs4741156(1),rs9406426(1),rs7848864(1),rs4445328(1),rs10959870(1),rs1443389(1),rs10809507(1),rs1154738(1),rs7048048(1),rs1443385(1),rs6474661(1),rs1561955(1),rs10959956(1),rs1822388(1),rs2120237(1),rs10809538(1),rs2821181(1),rs10960029(1),rs1838135(1),rs2586379(1),r…
1	rs6695170	107163389	4.34e-08	109	2	7	35	41	24	rs12140817(1),rs12131086(1),rs6683194(1),rs12117282(1),rs7519880(1),rs12121466(1),rs10785798(1),rs9325358(1),rs6656704(1),rs10494048(1),rs6695805(1),rs6681791(1),rs6697697(1),rs12066688(1),rs10881440(1),rs12734067(1),rs6582980(1),rs10881441(1),rs10881442(1),rs10881443(1),rs4393186(1),rs6703591(1),rs4311915(1),rs4494161(1),rs4462181(1),rs4336881(1),rs4385746(1),rs12138646(1),rs11589101(1),rs424411…
2	rs6704667	144218021	4.5e-08	23	0	0	3	12	8	rs12998761(1),rs12612084(1),rs16822524(1),rs13011344(1),rs13010737(1),rs5025201(1),rs6736101(1),rs4430884(1),rs13004397(1),rs12616939(1),rs12617059(1),rs11690735(1),rs13013016(1),rs12478031(1),rs3795872(1),rs4560048(1),rs12464672(1),rs12996951(1),rs6731065(1),rs13020925(1),rs12615880(1),rs4662336(1),rs6727288(1)
1	rs6679408	50591565	4.97e-08	104	64	16	2	2	20	rs1343424(1),rs12141962(1),rs3934240(1),rs6665118(1),rs768328(1),rs241501(1),rs2356392(1),rs1766377(1),rs1167264(1),rs1474910(1),rs4259707(1),rs12118183(1),rs4078484(1),rs6662979(1),rs9326010(1),rs7515388(1),rs9436444(1),rs9436445(1),rs9436446(1),rs9436447(1),rs4593875(1),rs6588375(1),rs4307603(1),rs4412638(1)

## Sheet: ST7
Supplementary Table 7. Significant PheWAS results for novel internalizing lead SNPs.
SNP: rs1381763
atlas ID	PMID	Year	Domain	Trait	P-value	N	EA	NEA
4170	29970889	2018	Psychiatric	Loneliness (MTAG)	2.217e-05	487647	A	C
4294	30696823	2019	Psychiatric	Chronotype	3.7e-05	449732	A	C
4327	30643256	2019	Psychiatric	Well-being spectrum	5.4477e-05	2311184	C	A
4171	29970889	2018	Psychiatric	Loneliness	7.4e-05	445024	A	C
4087	29255261	2018	Psychiatric	Neuroticism	0.000100254	329821	A	C
4325	30643256	2019	Psychiatric	Neuroticism (MA GWAMA)	0.000145255	523783	C	A
4321	30643256	2019	Psychiatric	Neuroticism (univariate)	0.000159336	523783	A	C
SNP: rs4698408
atlas ID	PMID	Year	Domain	Trait	P-value	N	EA	NEA
3888	27863252	2016	Immunological	Mean corpuscular volume (three-way meta)	2.292e-11	172433	A	G
3852	27863252	2016	Immunological	Mean corpuscular volume (two-way meta)	8.53241e-10	132353	A	G
3887	27863252	2016	Immunological	Mean corpuscular hemoglobin (three-way meta)	3.331e-09	172332	A	G
4138	29403010	2018	Immunological	Mean corpuscular volume	7.419e-09	108256	A	G
3851	27863252	2016	Immunological	Mean corpuscular hemoglobin (two-way meta)	2.50084e-08	132224	A	G
3990	29500382	2018	Psychiatric	Neuroticism sum score	1.624e-07	380506	G	A
3993	29500382	2018	Psychiatric	Irritability (IRR)	2.123e-07	260369	G	A
3286	31427789	2019	Psychiatric	Irritability	2.995e-07	369232	G	A
3992	29500382	2018	Psychiatric	Miserableness (MIS)	1.096e-06	267050	G	A
3795	29942085	2018	Psychiatric	Neuroticism	1.509e-06	390278	NA	NA
3285	31427789	2019	Psychiatric	Miserableness	1.541e-06	379907	G	A
4327	30643256	2019	Psychiatric	Well-being spectrum	4.31145e-06	2311184	A	G
3999	29500382	2018	Psychiatric	Worry too long after embarrassment (WORR-EMB)	8.486e-06	261094	G	A
4321	30643256	2019	Psychiatric	Neuroticism (univariate)	1.01935e-05	523783	G	A
4139	29403010	2018	Immunological	Mean corpuscular hemoglobin	1.057e-05	108054	A	G
3417	31427789	2019	Psychiatric	Neuroticism score	1.147e-05	312740	G	A
3292	31427789	2019	Psychiatric	Worry too long after embarrassment	1.403e-05	370660	G	A
4325	30643256	2019	Psychiatric	Neuroticism (MA GWAMA)	1.47331e-05	523783	A	G
3188	31427789	2019	Cardiovascular	Pulse rate (automated reading)	1.758e-05	361411	A	G
4326	30643256	2019	Psychiatric	Depressive symptoms (MA GWAMA)	1.86868e-05	1067913	A	G
4087	29255261	2018	Psychiatric	Neuroticism	2.51652e-05	329821	G	A
3900	27863252	2016	Immunological	Red blood cell count (three-way meta)	3.255e-05	172952	G	A
3301	31427789	2019	Psychiatric	Seen doctor (GP) for nerves, anxiety, tension or depression	4.556e-05	383771	G	A
3797	29942085	2018	Psychiatric	Depressive affect subcluster	5.645e-05	357957	G	A
4707	BioRxiv: https://doi.org/10.1101/288615	2019	Neurological	Splenium of corpus callosum mean diusivities	8.958e-05	17706	G	A
3849	27863252	2016	Immunological	Lymphocyte percentage of white cells (two-way meta)	9.30621e-05	132570	G	A
3848	27863252	2016	Immunological	Lymphocyte count (two-way meta)	0.000120016	132452	G	A
4293	30718901	2019	Psychiatric	Depression	0.0001467	500199	G	A
4377	30940143	2019	Cardiovascular	Resting heart rate	0.00015	458969	A	G
4011	29662059	2018	Psychiatric	Broad depression	0.000162032	322580	G	A

## Sheet: ST8
Supplementary Table 8. Results for SNPs with heterogenous effects across the second-order externalizing and internalizing spectrum.
SNP	CHR	BP	Q_Pval	SecondOrder_p	ADHD_p	AgeSex_p	ASB_p	AUD_p	CanUD_p	OUD_p	Risk_p	NumSex_p	TUD_p	ANX_p	Irritable_p	Lonely_p	MDD_p	Misery_p	PTSD_p	Wellbeing_p
rs10093774	8	10703293	2.05e-30	0.0152633	0.01971	3.67e-17	0.2306	0.07568	0.1646	0.1213	2.37e-08	4.7e-09	9.81e-06	0.0646355	1e-10	0.00130631	0.4312	1.29e-09	0.1862	0.2201
rs10095261	8	10815377	1.6e-11	0.531096	0.09692	1.33e-10	0.3534	0.5628	0.9958	0.95968	6.37e-07	0.0006616	0.04651	0.707188	0.00034594	0.323873	0.1266	0.128386	0.6213	0.3664
rs10275909	7	97298821	6.68e-09	6.51e-07	0.0198	0.00035199	0.7075	2.26e-05	0.0006056	0.927265	0.02966	3.66e-05	7.9e-05	0.0463157	0.235172	0.0323338	0.006122	0.00206208	0.2568	0.02107
rs10442	19	18545341	2.08e-10	0.255201	0.008931	1.2e-06	0.9009	0.0001259	5.73e-05	0.545003	0.3498	7.04e-06	0.00198	0.138947	0.767272	0.612105	0.01227	0.0104899	0.2504	0.005106
rs10871582	18	53276589	1.73e-11	1.6e-22	0.2818	9.98e-11	0.3828	1.68e-07	0.0009021	0.0288185	3.47e-05	0.0011	4.43e-05	0.00073241	9.79e-06	1.08e-08	4.43e-08	0.00307693	0.01518	0.1809
rs10969743	9	30559831	4.43e-08	0.00081189	0.00725	8.34e-05	0.5083	0.0006875	0.06653	0.145788	0.008598	4.7e-05	0.5445	0.130226	0.797673	0.515562	0.03105	0.592843	0.03779	0.2556
rs11004619	10	56642161	3.51e-08	0.00582215	0.04191	0.00489083	0.6592	0.03597	0.08197	0.288897	0.0003531	1.15e-06	6.55e-06	0.867318	0.393165	0.860682	0.04009	0.923083	0.1835	0.544
rs11022513	11	12840986	2.59e-10	0.0244681	0.005624	3.79e-05	0.775	0.0002958	0.001254	0.00731772	0.002472	0.00133	0.2809	0.172558	0.25953	0.896897	0.8823	0.16607	0.75	0.1847
rs11030084	11	27643725	1.02e-16	0.249314	0.004482	2.22e-06	0.1142	5.83e-05	0.01845	0.513686	1.7e-05	9.3e-06	1.91e-09	0.743754	0.0259983	0.33176	5.5e-06	0.290027	0.2955	0.8442
rs11030175	11	27992042	1.89e-08	5.99e-06	0.0005148	0.00074397	0.04094	0.001904	5.53e-05	0.145687	0.0001867	0.0128	0.003847	0.476351	0.18346	0.61656	0.01714	0.678753	0.6628	0.7677
rs1142	7	104756326	1.02e-12	1.58e-05	0.0006819	1.34e-07	0.05438	0.0004964	8.49e-05	0.634275	1.38e-05	0.0006175	0.8623	0.0267342	0.785861	0.265262	0.04386	0.97624	0.1089	0.6817
rs1146751	3	84889597	3.73e-18	8.75e-06	0.2714	1.63e-06	0.761	5.37e-10	5.45e-07	0.00525185	1.07e-07	0.0003403	0.2121	0.339402	0.59665	0.27316	0.609	0.772034	0.4649	0.8519
rs11628909	14	58819226	1.1e-16	9.84e-05	0.02207	8.62e-06	0.2327	4.74e-10	0.001303	0.323024	0.0009018	1.79e-05	0.01526	0.787576	0.556845	0.121763	0.3248	0.809234	0.8262	0.2892
rs11645478	16	7344604	8.37e-13	1.4e-05	0.2176	2.75e-09	0.4769	0.0004017	0.07489	0.904338	6.39e-05	8.11e-06	0.08567	0.97317	0.453028	0.736575	0.000287	0.71758	0.04994	0.8641
rs11681451	2	225334104	1.83e-15	0.000225539	0.005833	2.03e-09	0.7275	3.23e-05	0.01651	0.728665	0.0004969	1.03e-05	4.01e-06	0.0604256	0.689066	0.376425	0.5957	0.979738	0.2405	0.3319
rs11710434	3	49346130	6.05e-15	3.69e-29	0.0004274	5.17e-07	0.06619	9.07e-14	2.09e-11	0.00741871	0.05136	0.00133	4.09e-15	0.00048672	6.92e-05	4.82e-05	1.78e-13	9.86e-08	0.114	0.2413
rs11729080	4	112503872	1.47e-14	3.95e-08	8.22e-10	4.47e-16	0.217	3.16e-05	0.002146	1.97e-05	0.7864	9.28e-05	2.39e-06	0.0349124	0.817935	0.139522	0.1315	0.04946	0.4915	0.2218
rs11775441	8	87092120	9.15e-09	0.356843	0.0005597	0.00091337	0.002056	0.001992	0.009738	0.028848	0.06148	0.009959	0.007707	0.600011	0.203251	0.583087	0.6486	0.048417	0.8763	0.7644
rs1187417	14	104310025	6.77e-13	1.17e-07	0.8629	0.00112309	0.1042	3.39e-06	0.2134	0.0478503	2.83e-07	2.94e-08	0.002864	0.192297	0.655705	0.0223062	6.26e-05	0.611198	0.05363	0.4147
rs11932274	4	28000670	1.56e-08	0.00223431	0.003431	1.11e-05	0.3737	0.08442	0.002926	0.26039	0.0002772	1.13e-05	0.008882	0.0250872	0.726236	0.995086	0.164	0.292291	0.2653	0.3218
rs11971702	7	140120546	2.2e-08	1.46e-06	0.6394	1.23e-08	0.2587	0.02874	0.09183	0.338004	0.001632	1.21e-07	0.0573	0.096386	0.944748	0.0649462	4.01e-05	0.237869	0.1193	0.843
rs12046844	1	66238379	2.26e-08	0.0486408	0.01609	2.64e-06	0.4281	6.51e-06	0.004553	0.0272536	0.6536	0.1537	0.05303	0.121224	0.201776	0.00927128	0.2473	0.26902	0.09246	0.2618
rs12250380	10	106587950	3.4e-08	1.69e-13	5.03e-07	1.03e-11	0.7133	0.09656	0.1055	0.907915	0.006056	0.0001947	0.0001347	0.00095384	0.885074	0.0174278	5.98e-12	3.28e-05	0.5097	0.1222
rs12328348	2	60785937	4.71e-11	0.34912	0.04572	8.14e-09	0.8505	0.01406	0.2413	0.836292	0.02265	4.84e-09	0.3713	0.70717	0.00590552	0.662861	0.8547	0.523468	0.6713	0.08987
rs1235	14	47309496	6.26e-09	2.68e-15	6.16e-05	1.82e-10	0.9752	0.003819	0.0003656	0.317364	0.0009288	0.005516	0.2853	0.0319862	0.00077617	0.00019109	1.41e-07	0.00124416	0.7386	0.1211
rs12359870	10	134085559	5.98e-13	4.01e-09	2.51e-05	4.66e-09	0.3463	0.001694	0.01985	0.0215155	1.5e-05	8.94e-07	0.003467	0.725167	0.10091	0.299742	0.03017	0.0969461	0.8269	0.2593
rs12495178	3	85886077	2.81e-12	3.42e-05	0.00121	8.05e-13	0.7971	0.03296	0.001257	0.0709814	1.91e-10	0.001068	0.4707	0.0150401	0.0542413	0.0427913	0.01118	0.397016	0.6945	0.2577
rs12516369	5	104019775	7.79e-09	7.57e-09	1.41e-06	7.91e-05	0.2723	0.002488	0.0002212	0.288638	0.006409	4.29e-09	0.8749	0.0617729	0.0167217	0.0737827	0.0005147	0.812724	0.2051	0.7788
rs12529103	6	67519342	8.69e-10	0.0735729	0.1782	1.34e-10	0.4425	0.856	0.06054	0.399025	0.09791	2.73e-05	4.18e-07	0.465889	0.786242	0.59063	0.3198	0.0261679	0.6811	0.2518
rs12536903	7	97384827	1.55e-08	0.000954488	0.02376	0.00021874	0.5532	0.006653	0.002862	0.122581	6.29e-05	1.08e-05	0.0211	0.987167	0.911825	0.236393	0.8878	0.164963	0.867	0.2599
rs12619374	2	166271665	2.29e-09	0.23567	0.008608	6.56e-05	0.9249	2.48e-05	0.7809	0.0458443	0.8876	0.02115	9.32e-05	0.156153	0.0100896	0.940411	0.03152	0.017799	0.02496	0.0371
rs12639940	4	39420981	4.4e-08	0.816504	0.4415	0.075449	0.9959	2.23e-20	0.2687	0.472533	0.04799	0.4641	0.3134	0.201003	0.176045	0.252927	0.1545	0.0537252	0.6492	0.265
rs12678667	8	97802582	4.96e-11	2.19e-06	0.0003164	2.9e-07	0.8404	0.0001183	0.05482	0.361699	1.18e-06	0.1234	0.1709	0.194987	0.381524	0.831304	0.02152	0.717959	0.1119	0.2746
rs12780116	10	104821946	1.03e-11	7.27e-09	0.001984	9.27e-08	0.9995	0.001945	0.02968	0.138752	3.57e-06	4.53e-06	4.6e-07	0.42441	0.00012052	0.998157	0.1951	0.774288	0.3959	0.7712
rs12865343	13	55692494	5.83e-10	9.9e-13	0.3935	5.72e-08	0.8148	4.93e-06	1.69e-06	0.36479	0.05575	2.14e-05	7.91e-10	0.372566	0.00218601	0.279384	2.92e-05	0.0181257	0.1216	0.5756
rs12873833	13	59351639	1.22e-15	0.000124359	0.6579	1.04e-07	0.8046	4.57e-07	0.002938	0.132676	3.86e-05	5.5e-05	0.01361	0.108329	0.492021	0.382168	0.0006354	0.382059	0.02689	0.6656
rs13004345	2	174037347	4.66e-12	2.55e-07	3.79e-05	1.28e-11	0.3244	0.001327	0.01573	0.36208	0.0906	4.81e-05	3.48e-06	0.0482343	0.63146	0.0571722	0.01472	0.539103	0.0883	0.5225
rs13097782	3	35739575	4.53e-13	0.512169	0.88	1.1e-09	0.7812	0.05023	0.2156	0.491434	4.32e-05	1.32e-05	0.6274	0.903487	0.00320714	0.803888	0.01542	0.00120927	0.000817	0.504
rs13114738	4	103284865	3.22e-13	0.0691279	0.6742	0.844297	0.4458	7.58e-19	8.3e-06	0.0356467	0.03947	1.91e-05	0.0008243	0.151728	0.889405	0.10604	0.01433	0.400816	0.4545	0.9353
rs13195636	6	27509493	1.08e-14	2.63e-14	0.6769	0.00781922	0.5506	3.04e-07	2.7e-06	3.32e-05	3.44e-07	2.43e-11	5.55e-05	0.00014923	0.346942	0.00426301	5.41e-18	0.00018388	0.4265	1.58e-05
rs13387839	2	63428571	1.37e-10	0.0358108	0.005446	1.63e-10	0.7531	0.2324	0.0009414	0.792937	0.001899	2.32e-07	0.0003184	0.0493041	0.845731	0.25816	0.8477	0.462391	0.001208	0.1729
rs13411140	2	144215811	2.46e-10	2.56e-15	0.4139	4.38e-08	0.7121	9.06e-16	0.0007593	6.96e-06	0.003465	0.5834	0.7378	0.057397	0.0110583	0.169602	2.28e-05	1.73e-05	0.0005394	0.1148
rs1368546	2	104057364	8.83e-22	1.3e-09	0.0001057	1.09e-17	0.7204	8.98e-06	0.01052	0.135114	0.0006981	7.76e-08	1e-07	0.375048	0.299634	0.450929	0.006612	0.575317	0.003564	0.01454
rs1369643	15	47904808	1.72e-18	0.318805	5.84e-06	5.79e-13	0.5222	0.004151	0.003773	0.189384	0.008859	0.009748	7.92e-14	0.0302248	0.00049253	0.854782	0.7769	0.111786	0.5735	0.4672
rs1381274	14	98655131	6.01e-16	4.66e-08	9.51e-06	1.69e-07	0.1409	0.004089	7.19e-05	0.0398584	2.03e-06	5.66e-15	0.04578	0.467311	0.37883	0.0266054	0.0003142	0.785758	0.4679	0.3864
rs1421085	16	53800954	6.85e-19	0.829409	0.03171	0.147266	0.9533	6.69e-19	0.02891	9.8e-07	0.03281	1.43e-07	1.23e-08	0.314662	0.00045827	0.0153557	0.0001725	0.116612	0.6209	0.0007741
rs1461730	8	9187142	7.62e-14	0.910221	0.002635	1.72e-07	0.5323	0.0003104	0.3448	0.30734	0.004032	0.0001065	0.8825	0.789299	3.44e-05	0.140559	0.9053	0.0510101	0.3586	0.2508
rs1462219	11	41072962	1.17e-08	0.320881	0.8749	0.00036961	0.4286	0.001822	0.005932	0.972947	0.04276	0.0002956	7.15e-05	0.576279	0.117398	0.565505	0.09701	0.0163448	0.1752	0.1302
rs1526480	1	91209986	2.63e-17	2.66e-11	0.03326	2.45e-17	0.4276	2.03e-06	5.91e-10	0.0969086	0.2822	2.42e-08	8.83e-07	0.264404	0.200027	0.00330588	0.0001134	0.245862	0.5135	0.279
rs1597315	3	85616809	2.34e-48	0.000534461	3.95e-05	2.32e-20	0.3098	1.75e-07	2.34e-08	0.0100491	1.8e-29	2.8e-13	0.1269	0.0211459	0.00161012	0.00934207	0.005015	0.499412	0.3041	0.8752
rs16902221	5	45740040	3.51e-10	0.451385	0.2079	8.99e-08	0.248	0.2432	0.2886	0.758326	3.44e-05	0.0002956	0.5485	0.209965	0.372234	0.758886	0.7207	0.0299038	0.7677	0.2992
rs17186548	10	106550944	3.23e-10	5.19e-12	6.88e-08	2.31e-08	0.7147	0.01264	0.06833	0.0645853	7.41e-05	0.001221	0.0008503	0.00039793	0.546853	0.154433	2.89e-10	0.00038294	0.6601	0.1858
rs17827915	3	107805334	1.28e-09	0.103521	0.003038	1.76e-07	0.003863	0.1196	0.2276	0.255601	0.002814	0.001547	0.4437	0.442456	0.0108283	0.298168	0.01267	0.0961478	0.01986	0.41
rs1789891	4	100250419	2.5e-16	0.0693353	0.1603	0.15965	0.8378	4.16e-37	0.5453	0.16865	0.914	0.6827	0.6068	0.895764	0.0187162	0.11833	0.3616	0.182939	0.02914	0.1015
rs1878764	11	43746594	9.79e-09	0.000132781	0.5714	1.09e-08	0.1919	0.0003096	0.06237	0.178459	0.07944	1.16e-05	0.0003424	0.521498	0.0775635	0.292263	0.08467	0.851234	0.8558	0.8566
rs1897305	11	127478879	1.69e-11	0.0977728	0.0004817	1.41e-10	0.1405	0.0001727	0.1443	0.0269044	0.04517	0.007425	0.06498	0.426666	0.727963	0.212106	0.003751	0.120888	0.02641	0.3683
rs1925115	13	96958817	1.19e-08	6.6e-12	0.09969	1.5e-06	0.1708	6.22e-08	0.0003104	0.0524904	0.001591	0.0107	0.07004	0.0465299	3.91e-05	0.167702	0.0008831	0.510571	0.4317	0.02791
rs1940733	11	112892274	1.74e-18	1.87e-32	4.03e-05	6.99e-13	0.6785	1.37e-10	1.11e-08	1.65e-07	0.04531	1.18e-10	1.87e-11	1.42e-07	0.00026097	0.00017469	2.87e-10	1.41e-08	0.02174	0.003934
rs1989903	7	114137940	1.27e-26	6.53e-27	3.17e-10	1.22e-14	0.008871	3.42e-05	1.55e-08	0.0821834	8.15e-13	1.99e-13	0.05095	8.04e-05	0.00011334	3.21e-05	7.16e-10	0.060937	0.0004304	0.01941
rs199439	17	44793503	1.03e-08	2.14e-08	0.1267	0.903799	0.1663	1.33e-07	0.4164	0.521019	0.3881	3.93e-14	0.03442	0.00860148	4.09e-10	2.87e-07	0.002822	8.49e-09	0.001876	0.5449
rs2046768	11	46396479	2.38e-11	0.320373	0.06977	7.59e-06	0.8855	1.65e-05	0.03619	0.0524857	0.02708	0.05314	0.0007683	0.78113	0.103392	0.0286543	0.906	0.0281623	0.264	0.5865
rs2115322	5	50666618	3.61e-14	0.139409	0.6393	2.21e-07	0.666	1.94e-05	0.8542	0.261855	0.001602	9.06e-06	4.26e-06	0.725301	0.51286	0.07661	0.6125	0.0228169	0.2534	0.1437
rs2132661	15	47679726	3.45e-29	4.1e-13	0.0004871	9.19e-19	0.748	1.44e-13	0.003197	0.256994	0.02627	1.33e-08	4.3e-08	0.591393	0.918544	0.00010695	1.03e-09	0.301593	0.8786	0.01875
rs2135029	5	155856538	5.56e-12	0.00332707	0.02582	5.86e-06	0.4884	0.01994	0.03846	0.308765	5.42e-05	7.11e-05	0.01474	0.00787305	0.035165	0.151264	1.74e-05	0.0645622	0.0003163	0.5533
rs2303220	16	71988728	2.62e-11	4.68e-12	0.05781	3.49e-09	0.2631	0.005729	0.0008823	0.343479	2.73e-06	2.24e-09	0.03553	0.821176	0.00064069	0.0272395	0.003212	0.104962	0.0255	0.05278
rs2330607	5	30814630	2.95e-09	5.83e-07	0.2541	1.85e-06	0.1228	1.15e-05	1.9e-06	0.0298675	0.1316	0.0004958	0.004318	0.125017	0.889725	0.459508	0.0002362	0.138866	0.5094	0.5085
rs238910	11	113986879	8.54e-10	0.321394	0.4201	0.62619	0.4652	9.38e-07	0.08809	0.240655	0.001573	0.4342	2.9e-07	0.779405	0.00051429	0.14537	0.5597	0.00087169	0.3514	0.816
rs2409090	8	8653858	1.01e-14	0.414336	0.6898	1.16e-12	0.3529	0.06613	0.4898	0.160496	1.06e-09	0.01698	0.3412	0.926507	0.00744858	0.122938	0.2999	0.0155278	0.9915	0.586
rs2525570	17	29681245	2.86e-11	0.0107219	0.08363	0.0155445	0.9497	1.96e-08	4.56e-05	0.0188369	0.004641	0.0002284	0.04744	0.300586	0.731257	0.584954	0.1699	0.451481	0.248	0.301
rs2544809	5	176885499	3.31e-08	2.21e-07	0.6924	5.24e-06	0.1181	3.03e-05	0.006004	0.439502	0.0007777	0.0001156	0.09503	0.61335	0.185946	0.987393	0.07015	0.0120892	0.003206	0.6727
rs2613766	19	5066995	5.23e-11	0.607741	0.08651	9.44e-06	0.06069	5.37e-05	0.01771	0.0162483	0.1318	0.09193	5.1e-06	0.531211	0.106882	0.382026	0.3144	0.00452789	0.235	0.6891
rs2624839	3	50202231	1.12e-10	2.31e-10	5.04e-07	1.6e-19	0.5868	0.5936	4.27e-05	0.505297	0.005682	0.0009911	6.16e-06	0.00459937	0.903076	0.533358	1.42e-05	0.00169518	0.0002017	0.0287
rs292071	4	28456089	1.79e-10	5.71e-06	0.1442	8.77e-07	0.231	5.1e-05	0.01946	0.893588	0.08076	0.007425	2.91e-11	0.00076185	0.736721	0.77612	0.004139	0.777631	0.004516	0.3303
rs2979213	8	8188544	1.01e-09	0.734161	0.1466	4.46e-06	0.5118	0.04453	0.01699	0.00674134	0.009787	0.003059	0.287	0.225963	9.99e-05	0.0625804	0.09525	0.00128865	0.08238	0.03028
rs359249	2	60480237	5.69e-18	9.21e-10	0.003318	2.5e-13	0.04401	0.0224	0.001049	0.64523	1.27e-06	7.14e-09	0.4024	0.0900719	0.73427	0.0310845	0.0008852	0.0109099	0.0003026	0.2696
rs3739095	2	27556721	6.3e-09	0.941506	0.7119	0.0783756	0.2126	2.49e-16	0.3836	0.0338825	0.8142	0.6728	0.5333	0.299556	0.0469511	0.00790843	0.4873	0.105197	0.5693	0.287
rs3812281	7	135082751	6.22e-10	9.93e-12	0.003252	0.0010135	0.6781	2.23e-13	0.2623	2.65e-05	0.02865	0.3444	5.54e-06	0.0493122	0.0299215	0.686022	3.35e-06	0.0233359	0.02432	0.4457
rs390480	2	32510072	1.03e-08	2.76e-12	0.01447	4.57e-08	0.3376	0.0001081	0.02129	0.199712	0.003202	1.16e-05	0.007055	0.441657	9.55e-06	0.00233886	0.002895	0.391471	0.9304	0.149
rs413501	17	31556958	6.65e-09	1.11e-08	0.0005033	1.26e-05	0.08159	2.71e-05	0.1277	0.300417	0.05251	0.003381	0.000915	0.0001722	0.856783	0.770767	2.25e-08	0.144056	0.1393	0.5136
rs4143531	5	154978195	4.61e-09	0.0369777	0.01383	4.01e-09	0.4235	0.0002399	0.2352	0.985735	0.3178	0.01594	0.07232	0.873798	0.240519	0.6244	0.1133	0.404315	0.1256	0.8215
rs4235481	5	60093387	2.46e-09	0.000692932	0.11	3.52e-08	0.9447	2.37e-06	1.24e-06	0.137448	0.3154	0.1638	8.99e-08	0.597016	0.671865	0.229821	0.2144	0.0658395	0.5574	0.7023
rs4295265	4	102835645	1.93e-08	0.00466326	0.2242	0.0174273	0.6964	4.07e-08	0.01128	0.166603	0.02164	0.02219	0.1057	0.425644	0.852559	0.80506	0.01114	0.519314	0.4349	0.8047
rs437021	1	61738270	2.02e-08	0.380286	0.4633	1.63e-05	0.3117	0.07501	0.7963	0.400094	0.0004215	3e-12	0.7058	0.884402	0.0463441	0.533349	0.00307	0.836586	0.04609	0.1671
rs4416248	2	22455521	2.45e-09	6.3e-18	4.42e-07	8.91e-07	0.08689	0.05533	9.42e-05	0.381622	7.59e-06	2.34e-10	0.01629	0.00012329	0.00177856	0.00264095	3.07e-06	0.0032107	4.35e-05	0.01258
rs4522089	10	134150055	3.22e-08	0.0183862	6.44e-05	1.37e-06	0.3295	0.221	0.04027	0.215493	0.003713	1.13e-08	0.6855	0.699916	0.749224	0.445279	0.6985	0.697246	0.1568	0.4479
rs4546191	4	139847208	3.68e-11	0.0610624	0.1196	0.013088	0.9231	3.74e-10	0.0431	0.307382	0.1435	0.002521	0.0134	0.303957	0.991664	0.9982	0.1279	0.00703416	0.6405	0.02841
rs4573	6	26546808	1.44e-09	1.77e-08	0.0501	6.8e-08	0.9411	6.95e-06	1.45e-05	0.00853527	0.3458	0.00413	6.59e-06	0.00753178	0.939039	0.0440995	8.92e-06	0.125113	0.6843	0.1558
rs4721184	7	1950784	2.11e-08	0.801406	0.05698	5.77e-11	0.6257	0.03161	0.1367	0.767957	0.5915	8.03e-05	0.1142	0.926821	0.0690215	0.488524	0.001857	0.0143522	0.01583	0.8294
rs4735044	8	93057478	5.23e-11	2.12e-06	0.0001022	0.0526397	0.1723	1.06e-06	0.0005383	0.000162	0.0001565	1.56e-05	0.002243	0.125689	0.374693	0.0780416	0.01911	0.653586	0.8625	0.04043
rs4790981	17	65921834	3.84e-12	4.95e-14	0.001519	3.84e-05	0.1143	0.0001044	0.00534	0.0405562	0.0007678	1.03e-11	0.00445	0.00426562	0.0919156	1.61e-07	3.16e-09	0.195478	0.01774	0.6421
rs4851758	2	105952417	4.01e-08	0.000855076	0.1437	4.73e-09	0.4285	0.001004	0.1205	0.00255952	0.03384	0.2643	0.0007244	0.682764	0.426212	0.572378	0.1163	0.627429	0.05776	0.1067
rs4852975	2	73932465	3.55e-08	0.00163137	0.808	1.75e-05	0.02525	3e-08	0.03217	0.0455759	0.543	0.06951	0.08297	0.757083	0.782612	0.51806	0.02832	0.684672	0.09241	0.3304
rs4856222	3	82566370	1.49e-09	0.000661003	0.002107	1.09e-06	0.5529	0.002322	0.03562	0.423013	0.003018	0.00133	0.02487	0.573978	0.709532	0.59171	0.02633	0.757397	0.1434	0.2028
rs4857400	3	94076779	4.31e-09	0.00250868	0.007227	1.05e-06	0.2421	0.03167	0.1421	0.715259	0.000205	1.19e-06	0.5763	0.572859	0.464115	0.0391878	0.5664	0.277136	0.4092	0.09088
rs4869056	5	166992078	4.58e-11	7.11e-12	0.0003467	2.45e-08	0.6802	0.003311	0.7038	0.230283	0.001162	8.2e-07	1.2e-12	0.507536	0.177546	3.22e-05	8.8e-06	0.0070595	0.8194	0.1381
rs4975311	4	143500223	3.38e-10	4.54e-09	0.1217	0.00019152	0.5917	1.26e-07	0.002465	0.457702	0.002263	1.17e-06	0.658	0.0744602	0.34272	0.495279	4.04e-07	0.0939823	0.2813	0.8122
rs499257	1	44078384	1.45e-19	0.00017094	2.91e-13	5.53e-08	0.4386	0.001134	8.66e-05	0.308273	0.00117	4.57e-09	2.23e-08	0.624853	0.955841	0.975617	0.1657	0.1282	0.3914	0.6995
rs521095	2	45113852	1.01e-08	0.0125554	0.02718	0.00211714	0.6049	8.38e-05	0.005131	0.402045	0.002074	0.05109	0.000307	0.201312	0.399877	0.0309929	0.2992	0.956629	0.7799	0.309
rs633533	9	127819881	4.94e-18	1.06e-13	0.001978	2.54e-08	0.09871	2.9e-09	3.71e-10	1.59e-06	0.07996	1.81e-07	9.02e-11	0.137119	0.0121307	0.0848756	6.9e-07	0.648878	0.02252	0.7296
rs636817	8	9769869	1.4e-08	0.00473738	0.06219	2.24e-07	0.07731	0.5759	0.2771	0.0114892	0.03309	0.004877	0.0005635	0.178105	4.04e-05	0.0328384	0.02603	1.26e-06	0.9902	0.03581
rs6442644	3	16852853	4.07e-11	2.9e-17	0.0008556	0.00042386	0.423	5.72e-09	0.001247	0.00513709	0.001891	2.84e-05	2.3e-06	0.00868322	0.00225712	0.00494695	1.44e-08	0.00467998	0.01415	0.008211
rs6601419	8	10031748	3.61e-08	0.168782	0.15	1.39e-05	0.8954	0.023	0.2338	0.0697503	0.09852	0.01175	0.05253	0.846032	0.00012402	0.176803	0.7883	0.00035474	0.7979	0.575
rs6692813	1	80848989	3.94e-11	1.11e-14	0.4057	4.67e-05	0.623	3.92e-08	4.96e-05	0.0225647	1.05e-05	6.09e-06	0.184	0.022192	0.00090272	0.00132329	1.54e-07	0.114101	0.09196	0.7592
rs6697696	1	197792255	2.51e-08	4.69e-06	0.1624	1.2e-06	0.7966	3.45e-06	0.04553	0.762823	0.5134	0.0004515	1.89e-07	0.646617	0.319126	0.00107023	0.05551	0.314558	0.559	0.5956
rs6745270	2	44842487	2.45e-13	0.000230051	0.06731	2.01e-18	0.903	0.2929	0.4254	0.560742	7.42e-05	2.96e-06	0.9404	0.500301	0.901565	0.442924	0.3756	0.0731399	0.3597	0.6697
rs6795060	3	117642675	3.95e-09	8.34e-05	9.24e-07	3.03e-11	0.4603	0.01076	0.18	0.295547	0.4313	2.7e-07	0.0002834	0.0276186	0.0810724	0.159179	0.00151	0.232296	0.2367	0.6843
rs6868380	5	49624307	2.34e-09	0.223315	0.7959	6.66e-08	0.09122	0.02313	0.2791	0.0272597	1.74e-05	0.0003068	0.3147	0.393828	0.335043	0.552246	0.7944	0.133313	0.8907	0.03645
rs6986386	8	9421789	1.4e-09	0.227895	0.01695	4.66e-07	0.199	0.01002	0.29	0.197436	0.01984	0.004664	0.1324	0.566105	0.00232741	0.768255	0.04935	0.235514	0.4009	0.8028
rs7098086	10	107372392	4.28e-09	1.41e-07	0.1429	6.75e-05	0.1819	2.34e-05	0.05867	0.914175	0.0003594	0.01175	0.01479	0.00106153	0.468338	0.0229986	3.3e-06	0.0993313	0.02129	0.6856
rs7114833	11	79870120	5.34e-14	0.304105	0.007361	1.76e-09	0.3965	0.009968	0.1765	0.208273	0.0007595	0.0001834	0.04564	0.84064	0.00866329	0.594502	0.2488	0.499937	0.4567	0.08959
rs7124442	11	27677041	8.72e-14	0.0651149	1.44e-05	1.09e-05	0.6326	0.001518	0.006447	0.663719	9.89e-05	9.18e-06	6.56e-06	0.0649898	0.00596761	0.124294	0.03774	0.29151	0.2372	0.8049
rs7519259	1	66434743	5.78e-14	4.44e-15	0.01277	6.14e-09	0.3802	1.54e-11	1.83e-09	0.0499479	0.284	0.0001947	9.26e-09	0.00162604	0.00451459	0.2502	7.02e-05	0.0587861	0.9368	0.05576
rs7547059	1	73848537	1.44e-10	2.19e-17	0.0009786	0.0005366	0.3576	6.16e-09	5.15e-07	0.00207267	0.007056	0.9505	5.1e-20	8.79e-06	0.00099837	0.189639	5.85e-13	0.271052	0.001447	0.6361
rs7561939	2	124944800	2.72e-08	8.71e-05	0.1278	0.0400949	0.9626	0.0003039	0.1491	0.578968	5.23e-05	3.32e-06	0.3429	0.0214854	0.997176	0.612122	2.38e-05	0.397542	0.01238	0.06148
rs7606840	2	27243364	4.97e-10	8.21e-07	0.002098	2.76e-05	0.418	0.0003738	0.01147	0.217516	2.17e-06	0.0439	0.2189	0.00137392	0.304434	0.444119	0.00144	0.523959	0.002735	0.6215
rs7644389	3	17502918	5.23e-11	0.0343406	0.0367	6.36e-08	0.08553	0.09438	0.5956	0.529125	1.47e-06	0.01594	0.1814	0.851367	0.285895	0.0770844	0.04441	0.0339459	0.6943	0.05129
rs7644873	3	85720888	3.09e-15	2.21e-05	0.1497	1.22e-08	0.7456	3.44e-05	1.35e-05	0.0153683	8.7e-10	0.003488	0.05001	0.586694	0.645973	0.206685	0.8012	0.61624	0.4681	0.6875
rs766406	6	26319588	1.89e-19	1.49e-07	0.8518	9.01e-09	0.3596	1.67e-10	0.005737	0.00058054	0.0001082	0.0005843	1.3e-12	0.674374	0.803031	0.0678523	0.02347	0.18911	0.8263	0.2438
rs7669969	4	31165942	1.65e-11	0.2145	0.005294	0.0175911	0.4517	0.002799	0.01085	0.819363	0.0001356	4.12e-08	0.001193	0.709449	0.155319	0.190652	0.6674	0.0262202	0.5754	0.6298
rs781471	6	125007327	4.28e-09	1.4e-06	0.07184	2.29e-07	0.1625	5.78e-05	0.9708	0.0570139	0.004515	0.0006395	0.2135	0.191227	0.785224	0.335232	0.0004453	0.167978	0.06772	0.5483
rs7937768	11	121635061	1.27e-08	0.000148427	0.1094	0.36898	0.1047	1.57e-14	7.83e-06	0.0495204	0.8877	0.1133	5.47e-08	0.538358	0.792047	0.140719	0.1587	0.0807868	0.6453	0.7183
rs8003422	14	103321603	1.31e-10	1.63e-08	5.93e-05	1.35e-10	0.3208	0.002502	0.06276	0.0756177	0.005739	0.004664	0.003952	0.00101892	0.7102	0.126881	4.37e-09	0.401731	0.02015	0.6454
rs8085454	18	53489366	1.5e-14	3.74e-07	0.1171	0.00014415	0.316	4.58e-05	0.002241	0.162606	2.07e-07	2.51e-15	0.2162	0.13074	0.0152434	0.426013	0.1243	0.228976	0.6096	0.142
rs827162	3	158023087	6.38e-10	4.03e-13	0.0001188	8.19e-05	0.04648	1.91e-07	0.1213	0.0316164	0.01394	0.001221	0.0004632	0.0002889	0.151109	0.00963465	1.64e-07	0.0199639	0.03411	0.06487
rs838039	2	140342288	5.35e-11	2.09e-08	0.1161	2.25e-11	0.715	0.0004059	0.02277	0.0429304	0.01173	1.2e-07	0.004143	0.297391	0.0796914	0.0563823	0.007611	0.465108	0.4983	0.1611
rs901532	2	62763347	2.74e-11	0.000631498	0.09019	3.2e-07	0.04656	0.000929	0.001853	0.924339	0.1913	4.16e-09	1.59e-06	0.427362	0.95696	0.159351	0.6989	0.659643	0.3986	0.3805
rs932057	3	86292618	8.23e-13	2.59e-05	0.02318	1.23e-07	0.6933	0.0002125	0.06145	0.237887	6.51e-05	9.96e-09	0.1254	0.61038	0.13124	0.267371	0.06087	0.0316384	0.6556	0.3228
rs9371564	6	152262113	1.09e-13	1.18e-07	0.04324	1.46e-23	0.9176	0.02078	0.001518	0.00094709	0.03432	0.001221	0.118	0.00073878	0.798286	0.399003	1.14e-10	0.651254	0.003833	0.7891
rs9388294	6	98670458	2.48e-08	0.203046	0.0004811	0.112335	0.8055	0.05686	0.4341	0.0928527	0.007398	1.97e-09	0.01	0.00058816	0.00151977	0.890704	0.2381	0.0107785	0.006434	0.6773
rs966971	2	60138262	1.95e-19	1.57e-07	0.001014	2.61e-19	0.3601	0.05363	0.005091	0.384903	5.12e-08	2.24e-09	2.47e-05	0.837645	0.975891	0.317564	0.004234	0.526559	0.1259	0.008563

## Sheet: ST9
Supplementary Table 9. Lead SNPs for the second-order externalizing and internalizing spectrum.
CHR	SNP	BP	P	TOTAL	NSIG	S05	S01	S001	S0001	SP2
3	rs2117938	49263850	2.14e-29	138	59	4	14	0	61	rs4858819(1)	rs9876848(1)	rs9311430(1)	rs9682444(1)	rs9835307(1)	rs9311433(1)	rs9755490(1)	rs7430501(1)	rs10780033(1)	rs9840684(1)	rs12493289(1)	rs4974079(1)	rs6446252(1)	rs7623023(1)	rs4974087(1)	rs7649458(1)	rs4974085(1)	rs7431710(1)	rs11920534(1)	rs11924597(1)	rs1134591(1)	rs7430198(1)	rs7628719(1)	rs4974082(1)	rs6446196(1)	rs6768433(1)	rs7621015(1)	rs4974080(1)	rs6446205(1)	rs9846123(1)	rs7626445(1)	rs9840050(1)	rs4521268(1)	rs4513485(1)	rs3212(1)	rs4279134(1)	rs6779394(1)	rs6784111(1)	rs4955410(1)	rs11715581(1)
11	rs7125588	113436072	3.42e-25	10	0	0	0	0	10	rs6589381(1)
11	rs17602038	113364691	4.21e-24	35	0	5	5	0	25	rs2734839(1)	rs4587762(1)	rs11214611(1)	rs4648317(1)	rs10891551(1)	rs4350392(1)	rs4938019(1)	rs4421776(1)	rs4611239(1)	rs10736466(1)	rs4938022(1)	rs10891564(1)	rs6589379(1)	rs4503578(1)	rs7111031(1)	rs4938024(1)	rs12361261(1)	rs4466875(1)	rs7131411(1)
18	rs4632195	50746748	9.57e-24	116	0	2	0	0	114	rs9950907(1)	rs1943126(1)	rs2298655(1)	rs2298654(1)	rs3819136(1)	rs8096807(1)	rs8097335(1)	rs8084200(1)	rs11659774(1)	rs11663824(1)	rs6508210(1)	rs7231178(1)	rs11664095(1)	rs11082974(1)	rs7230034(1)	rs16956411(1)	rs1078459(1)	rs4939728(1)	rs1431187(1)	rs6508217(1)	rs905761(1)	rs17411548(1)	rs4940251(1)	rs8084830(1)	rs7505772(1)	rs11662416(1)	rs2047914(1)	rs2043146(1)	rs2043145(1)	rs1897261(1)	rs8097821(1)	rs17503301(1)	rs1979914(1)	rs965943(1)	rs17503448(1)	rs1504745(1)	rs11872471(1)	rs1367637(1)	rs1367636(1)	rs11873644(1)
18	rs12955614	52788877	8.69e-22	14	0	0	0	0	14	rs4128242(1)	rs1942893(1)	rs9951150(1)
18	rs1452787	53207207	1.09e-21	18	1	0	0	0	17	rs10503002(1)	rs9946669(1)	rs663118(1)	rs11151206(1)	rs11151224(1)	rs784216(1)
7	rs10950391	12261829	2.27e-20	59	0	33	0	9	17	rs17165645(1)	rs10950395(1)	rs6966915(1)	rs4721058(1)	rs7792410(1)	rs13230513(1)	rs12667950(1)	rs5011431(1)	rs5011432(1)	rs5011434(1)	rs12669919(1)	rs1468804(1)	rs1060700(1)	rs1548884(1)	rs17670901(1)
1	rs7523829	73758117	4.41e-20	233	101	23	15	4	90	rs12127723(1)	rs10889992(1)	rs12117216(1)	rs11210071(1)	rs11210072(1)	rs11210073(1)	rs12136862(1)	rs12134034(1)	rs7544848(1)	rs12140851(1)	rs12138089(1)	rs2422320(1)	rs2422321(1)	rs2901713(1)	rs10889994(1)	rs7519251(1)	rs6657272(1)	rs1917882(1)	rs12143796(1)	rs1405051(1)	rs6679116(1)	rs6689491(1)	rs12136682(1)	rs11210085(1)	rs4584349(1)	rs12122377(1)	rs11210100(1)	rs4409593(1)	rs4649972(1)	rs12724536(1)	rs4233096(1)	rs4344273(1)	rs12118352(1)	rs11210105(1)	rs4491023(1)	rs12089282(1)	rs9645298(1)	rs4452995(1)	rs7528640(1)	rs11210155(1)
6	rs2398132	100981200	7.28e-20	181	0	0	12	43	126	rs241816(1)	rs240762(1)	rs12206564(1)	rs11155496(1)	rs12193960(1)	rs12207086(1)	rs6905221(1)	rs6938440(1)	rs11155596(1)	rs7740826(1)	rs2036052(1)	rs12209887(1)	rs6904959(1)	rs1039031(1)	rs1039032(1)	rs11155606(1)	rs10872622(1)	rs7748644(1)	rs13208757(1)	rs6570922(1)	rs2132169(1)	rs2132168(1)	rs6909880(1)	rs12206838(1)	rs11155618(1)	rs11967951(1)	rs6570970(1)	rs6919283(1)	rs723743(1)	rs9377232(1)	rs10457849(1)	rs6932158(1)	rs3811078(1)	rs9322212(1)	rs9322216(1)	rs9404053(1)	rs9404054(1)	rs9399694(1)	rs9485410(1)	rs7740783(1)
11	rs10891496	112920921	2.19e-19	69	1	2	14	4	48	rs7110628(1)	rs4595579(1)	rs2155289(1)	rs11214457(1)	rs11214459(1)	rs17114685(1)	rs17114687(1)	rs11214463(1)	rs17114689(1)	rs12288908(1)	rs17114702(1)	rs17114705(1)	rs10891493(1)	rs12574893(1)	rs12277922(1)	rs10891495(1)	rs10891497(1)	rs12576197(1)	rs10891498(1)	rs7946527(1)	rs2853191(1)	rs1436107(1)	rs10502165(1)	rs1245090(1)	rs11214476(1)	rs1465765(1)	rs1245115(1)	rs17114757(1)	rs1245111(1)	rs1245110(1)	rs1962881(1)	rs7933413(1)	rs1245109(1)	rs1245108(1)	rs17114801(1)	rs10891503(1)	rs12789616(1)	rs1245106(1)	rs2885208(1)	rs17114821(1)
3	rs7625233	16852736	1.12e-18	119	21	20	6	3	69	rs9310502(1)	rs4128498(1)	rs12107299(1)	rs9829793(1)	rs13073517(1)	rs17272677(1)	rs4684303(1)	rs9858071(1)	rs895941(1)	rs9868600(1)	rs6442643(1)	rs9854865(1)	rs4685393(1)	rs7625399(1)	rs748832(1)	rs6800583(1)	rs2122256(1)	rs1823369(1)	rs1823368(1)	rs6765673(1)	rs748440(1)	rs9842181(1)	rs9883851(1)	rs9310508(1)	rs6782026(1)	rs9836131(1)	rs9840099(1)	rs6442645(1)	rs9846711(1)	rs9809105(1)	rs9870893(1)	rs9871051(1)	rs9851732(1)	rs9867227(1)	rs1866860(1)	rs6796955(1)	rs6797038(1)	rs9877897(1)	rs9878301(1)	rs2347655(1)
9	rs10821128	96209943	1.13e-18	68	12	0	5	13	38	rs13300936(1)	rs882851(1)	rs6479492(1)	rs10761239(1)	rs4744257(1)	rs10761240(1)	rs2254712(1)	rs2398845(1)	rs2994369(1)	rs10117225(1)	rs10821177(1)	rs10761243(1)	rs2265575(1)	rs2994365(1)	rs10123378(1)	rs2989753(1)	rs2989755(1)	rs10821181(1)	rs10992804(1)	rs7864397(1)	rs10821191(1)	rs3750354(1)	rs10821192(1)	rs10761250(1)	rs3750357(1)	rs10992839(1)	rs10992840(1)	rs3750362(1)	rs10992853(1)	rs10992854(1)	rs10992860(1)	rs7040340(1)	rs7023781(1)	rs10992865(1)	rs7848336(1)	rs2398866(1)	rs10992867(1)	rs12683791(1)	rs7045925(1)	rs10992876(1)
18	rs7237475	35167222	2.69e-18	52	1	3	0	5	43	rs948540(1)	rs7505519(1)	rs11664242(1)	rs11661422(1)	rs11082016(1)	rs8090323(1)	rs1365661(1)	rs2162440(1)	rs2861296(1)	rs7235755(1)	rs11872381(1)	rs2861297(1)	rs9960860(1)	rs12458189(1)	rs1346281(1)	rs12373413(1)	rs11082017(1)	rs11082018(1)	rs9961687(1)	rs9950896(1)	rs9961877(1)	rs1427027(1)	rs17570856(1)	rs875075(1)	rs16969178(1)	rs9945536(1)	rs890544(1)	rs17671611(1)	rs9952499(1)	rs1427028(1)	rs1427029(1)	rs1427030(1)	rs9304178(1)	rs9952679(1)	rs9963645(1)	rs11664658(1)	rs9953394(1)
20	rs2425752	44702120	5.4e-18	29	0	0	0	0	29	rs3848726(1)	rs6131012(1)	rs6032662(1)	rs6065926(1)	rs6131014(1)	rs6074022(1)	rs4812997(1)	rs1569723(1)	rs1883832(1)	rs4239702(1)	rs1883833(1)	rs16991114(1)	rs12624690(1)	rs1883834(1)	rs1883835(1)	rs2064405(1)	rs13036554(1)	rs13045771(1)
18	rs7235757	53067954	1.49e-17	36	3	2	4	4	23	rs1125313(1)	rs1539951(1)	rs1440473(1)	rs12607679(1)	rs4801150(1)	rs2958178(1)	rs2958171(1)	rs2958186(1)	rs2958162(1)	rs2919451(1)	rs2919450(1)	rs2958166(1)	rs9320016(1)	rs4524013(1)	rs4500831(1)	rs4468713(1)	rs7231748(1)	rs1452788(1)	rs732779(1)	rs9966430(1)
2	rs8179610	22500090	2.83e-17	22	0	0	2	0	20	rs4589792(1)	rs7585241(1)	rs7600146(1)	rs12712388(1)	rs11889100(1)	rs7583826(1)	rs12621172(1)	rs1355178(1)	rs1533046(1)	rs4420731(1)	rs4325779(1)
11	rs6277	113283459	1.07e-16	48	7	4	11	4	22	rs7118188(1)	rs11604671(1)	rs2734849(1)	rs2859545(1)	rs11214599(1)	rs11214601(1)	rs2587550(1)	rs1003641(1)	rs2511520(1)	rs10891549(1)	rs1554929(1)	rs2242592(1)	rs6276(1)	rs2734841(1)	rs1124491(1)	rs1079595(1)	rs1079594(1)	rs6275(1)	rs1076560(1)	rs2283265(1)	rs2440390(1)	rs2075654(1)	rs2005313(1)	rs1076562(1)	rs7103679(1)	rs4586205(1)
10	rs17118088	106764748	2.99e-16	189	37	0	2	3	147	rs10509774(1)	rs7073438(1)	rs6584630(1)	rs6584631(1)	rs7901022(1)	rs4598601(1)	rs6584632(1)	rs17775106(1)	rs1525388(1)	rs10509779(1)	rs6584634(1)	rs11192226(1)	rs11596606(1)	rs12244307(1)	rs10884064(1)	rs12246611(1)	rs12246569(1)	rs6584635(1)	rs4917432(1)	rs2864035(1)	rs7068754(1)	rs2177741(1)	rs1464869(1)	rs7091010(1)	rs7904927(1)	rs1404784(1)	rs7100852(1)	rs7076546(1)	rs4584504(1)	rs7087257(1)	rs1525386(1)	rs7096048(1)	rs7096189(1)	rs7080542(1)	rs999696(1)	rs6584639(1)	rs7101039(1)	rs7071429(1)	rs6584641(1)	rs6584642(1)
7	rs11764590	2032803	6.77e-16	69	23	1	0	5	40	rs10277267(1)	rs12539381(1)	rs10271168(1)	rs4436012(1)	rs10277923(1)	rs1112898(1)	rs11766215(1)	rs10950371(1)	rs13238613(1)	rs11761457(1)	rs7789703(1)	rs2895215(1)	rs4719317(1)	rs11766944(1)	rs11764337(1)	rs11770148(1)	rs7788921(1)	rs10278591(1)	rs10267593(1)	rs7804190(1)	rs11773627(1)	rs10950503(1)	rs4721302(1)	rs11762636(1)	rs11766468(1)	rs1533829(1)	rs7801349(1)	rs10276536(1)	rs6461115(1)	rs4721359(1)	rs733611(1)	rs3757440(1)	rs2270052(1)	rs12534131(1)
13	rs11839325	66588146	6.82e-16	88	7	6	19	7	49	rs1460655(1)	rs10492541(1)	rs7328824(1)	rs17837226(1)	rs9540616(1)	rs17252270(1)	rs3843944(1)	rs11839567(1)	rs6562431(1)	rs3850030(1)	rs4126982(1)	rs11839037(1)	rs3850031(1)	rs11842598(1)	rs7988764(1)	rs3850033(1)	rs17252298(1)	rs9529008(1)	rs11843820(1)	rs17837235(1)	rs17837236(1)	rs10492540(1)	rs7998817(1)	rs2767636(1)	rs17080638(1)	rs2767637(1)	rs2767640(1)	rs17080661(1)	rs614249(1)	rs570553(1)	rs1536488(1)	rs2779134(1)	rs4573823(1)	rs4433683(1)	rs7993558(1)	rs17080745(1)	rs17080749(1)	rs17080764(1)	rs17080766(1)	rs7139910(1)
14	rs1491905	47296286	7.56e-16	88	7	4	18	47	12	rs11157496(1)	rs12100560(1)	rs8008753(1)	rs8008838(1)	rs2899981(1)	rs4318124(1)	rs11847489(1)	rs12185004(1)	rs12185003(1)	rs11625708(1)	rs11625752(1)	rs11625716(1)	rs12886911(1)	rs8011178(1)	rs8011612(1)	rs8018403(1)	rs8017714(1)	rs2415973(1)	rs2415974(1)	rs8007908(1)	rs8009287(1)	rs8014836(1)	rs12433080(1)	rs11627518(1)	rs8009432(1)	rs11626664(1)	rs8016371(1)	rs10149370(1)	rs11852175(1)	rs8022067(1)	rs7156814(1)	rs7159042(1)	rs7147846(1)	rs7145813(1)	rs2415982(1)	rs10138214(1)	rs12589974(1)	rs17671850(1)	rs11157502(1)	rs1761012(1)
7	rs17137124	114210814	1.19e-15	59	0	6	0	0	53	rs12532000(1)	rs1728438(1)	rs1527154(1)	rs2690839(1)	rs2694946(1)	rs1852471(1)	rs1527158(1)	rs17372022(1)	rs12705973(1)	rs12705974(1)	rs12705975(1)	rs2396766(1)	rs4236599(1)	rs13226763(1)	rs1456020(1)	rs12705977(1)	rs12671330(1)	rs12705978(1)	rs12705980(1)	rs12705981(1)	rs12705982(1)	rs13222712(1)	rs12705986(1)	rs2045293(1)	rs10500039(1)	rs13312596(1)	rs1378767(1)	rs12705988(1)	rs13233601(1)	rs1869839(1)	rs1378770(1)	rs6973473(1)	rs1979089(1)	rs613499(1)	rs601926(1)	rs2124474(1)	rs17292989(1)	rs684253(1)	rs681914(1)	rs623144(1)
11	rs11607056	57496820	3.98e-15	73	0	2	4	0	67	rs11603020(1)	rs1613592(1)	rs10896633(1)	rs1798173(1)	rs499188(1)	rs1783818(1)	rs12805841(1)	rs1783980(1)	rs488769(1)	rs1783981(1)	rs1783978(1)	rs12804972(1)	rs1783979(1)	rs1785499(1)	rs1647405(1)	rs11229109(1)	rs7117020(1)	rs2956981(1)	rs9420(1)	rs3017889(1)	rs11570176(1)	rs10792110(1)	rs4611222(1)	rs11570190(1)	rs10896644(1)	rs653889(1)	rs665058(1)	rs708228(1)	rs10896649(1)	rs471398(1)	rs606499(1)	rs1786438(1)	rs585337(1)	rs12807250(1)	rs627145(1)	rs652908(1)	rs7936998(1)	rs7117205(1)	rs11601320(1)	rs12807357(1)
3	rs17598137	49891362	6.49e-15	48	1	0	0	2	45	rs11706549(1)	rs9859153(1)	rs6802890(1)	rs2234391(1)	rs1128535(1)	rs7648987(1)	rs695238(1)	rs2271960(1)	rs2271961(1)	rs3796386(1)	rs2883059(1)	rs952594(1)	rs11712056(1)	rs7615206(1)	rs2352984(1)	rs868891(1)	rs11709573(1)	rs6774354(1)	rs4688753(1)	rs7430334(1)	rs6762477(1)	rs6793528(1)	rs2624822(1)	rs3774734(1)	rs7061(1)	rs2247510(1)	rs1061474(1)	rs2624826(1)	rs2856238(1)	rs2856237(1)	rs2189691(1)	rs13100903(1)	rs1283(1)	rs7637429(1)	rs1394812(1)	rs4522758(1)
10	rs2496014	106599009	6.55e-15	104	4	12	12	12	64	rs11192148(1)	rs4918125(1)	rs4918126(1)	rs10786820(1)	rs12264935(1)	rs3001932(1)	rs1387827(1)	rs1387828(1)	rs2496031(1)	rs7906784(1)	rs11192187(1)	rs10884043(1)	rs902302(1)	rs2451467(1)	rs970054(1)	rs970052(1)	rs902301(1)	rs902300(1)	rs1873304(1)	rs2491364(1)	rs2496034(1)	rs1490172(1)	rs4144552(1)	rs2496035(1)	rs969177(1)	rs1490182(1)	rs11192197(1)	rs1490180(1)	rs1490178(1)	rs4918129(1)	rs2496018(1)	rs4917430(1)	rs11192201(1)	rs4918131(1)	rs2496013(1)	rs7900775(1)	rs2496009(1)	rs10884054(1)	rs11192203(1)	rs2451471(1)
11	rs4752857	47655752	7.73e-15	225	26	7	4	13	175	rs7117404(1)	rs10769258(1)	rs4992357(1)	rs896816(1)	rs7940536(1)	rs11601603(1)	rs6485753(1)	rs4752990(1)	rs10838702(1)	rs4752993(1)	rs10769262(1)	rs11605672(1)	rs1377416(1)	rs1534576(1)	rs10769264(1)	rs4752999(1)	rs755553(1)	rs2293576(1)	rs2293577(1)	rs2293578(1)	rs2053979(1)	rs10742803(1)	rs3781625(1)	rs10838709(1)	rs12292911(1)	rs11604680(1)	rs7103648(1)	rs11039244(1)	rs7950696(1)	rs1317149(1)	rs2242081(1)	rs7124681(1)	rs6485758(1)	rs11039266(1)	rs4752845(1)	rs10742814(1)	rs11039280(1)	rs7928842(1)	rs11039290(1)	rs2280231(1)
3	rs11710798	48570686	8.13e-15	10	0	0	0	2	8	rs734071(1)
9	rs10465137	122659596	8.17e-15	21	0	0	0	1	20	rs10984729(1)	rs7851213(1)	rs1333909(1)	rs10118916(1)	rs7032155(1)	rs17483782(1)	rs1333908(1)	rs1413325(1)	rs1333904(1)	rs7873013(1)
2	rs2717040	58169494	8.64e-15	52	2	10	3	3	34	rs13026414(1)	rs2717029(1)	rs2717030(1)	rs970941(1)	rs2717031(1)	rs2717038(1)	rs2717039(1)	rs1568253(1)	rs6545677(1)	rs12620940(1)	rs1051061(1)	rs1016771(1)	rs13011711(1)	rs9789483(1)	rs9789714(1)	rs7593369(1)	rs7560589(1)	rs1990583(1)	rs4399710(1)	rs6753024(1)	rs7570272(1)	rs10427214(1)	rs17049502(1)	rs7606002(1)	rs11894830(1)	rs17049535(1)	rs17049548(1)	rs17269105(1)	rs17269126(1)
5	rs2447828	103947205	8.8e-15	158	5	0	31	14	108	rs349588(1)	rs2963213(1)	rs2919959(1)	rs2963215(1)	rs2963216(1)	rs2963217(1)	rs1442113(1)	rs6863432(1)	rs12719528(1)	rs10071688(1)	rs6881764(1)	rs6888556(1)	rs6859205(1)	rs12189326(1)	rs4235638(1)	rs4495150(1)	rs10077445(1)	rs4703305(1)	rs4703036(1)	rs4703037(1)	rs17165657(1)	rs6866475(1)	rs6892093(1)	rs6890980(1)	rs17411887(1)	rs12519782(1)	rs4299708(1)	rs4374733(1)	rs7703545(1)	rs10075330(1)	rs748167(1)	rs1363094(1)	rs6867959(1)	rs7709639(1)	rs7713825(1)	rs10064425(1)	rs10064760(1)	rs17347072(1)	rs10059133(1)	rs6865511(1)
8	rs6469450	114179599	1.15e-14	83	6	4	15	15	43	rs13271162(1)	rs231313(1)	rs231312(1)	rs170760(1)	rs231306(1)	rs231305(1)	rs231302(1)	rs231301(1)	rs231323(1)	rs2125553(1)	rs1532798(1)	rs979896(1)	rs7464518(1)	rs2219898(1)	rs16892653(1)	rs10955658(1)	rs9643080(1)	rs9642822(1)	rs1513526(1)	rs12548037(1)	rs6987567(1)	rs12545448(1)	rs12545433(1)	rs4520191(1)	rs12680782(1)	rs9297496(1)	rs10505205(1)	rs10091527(1)	rs7464755(1)	rs16884840(1)	rs4242555(1)	rs4876516(1)	rs7826889(1)	rs10107219(1)	rs1348382(1)	rs10088331(1)	rs4876309(1)	rs4876517(1)	rs734622(1)	rs10088339(1)
10	rs1334557	8790819	3e-14	16	0	0	0	3	13	rs17144411(1)	rs12573107(1)	rs10905474(1)	rs7918384(1)	rs10905479(1)
6	rs200965	27866384	3.31e-14	412	45	24	27	19	297	rs6940230(1)	rs1892253(1)	rs13213957(1)	rs13200921(1)	rs9467600(1)	rs9467606(1)	rs9467609(1)	rs9467613(1)	rs6939997(1)	rs6940698(1)	rs13201341(1)	rs1324088(1)	rs1324087(1)	rs9467621(1)	rs1177441(1)	rs1165168(1)	rs13211947(1)	rs523383(1)	rs555460(1)	rs972087(1)	rs501220(1)	rs9467626(1)	rs13198474(1)	rs629444(1)	rs7750960(1)	rs9467632(1)	rs13208859(1)	rs13220488(1)	rs13207673(1)	rs7748167(1)	rs9461222(1)	rs9467635(1)	rs9295675(1)	rs3734523(1)	rs6940007(1)	rs13192713(1)	rs17587226(1)	rs13196552(1)	rs13192365(1)	rs13214280(1)
9	rs10818080	120510180	6.08e-14	87	4	4	2	0	77	rs551760(1)	rs7846760(1)	rs7860993(1)	rs10759939(1)	rs10739498(1)	rs10818084(1)	rs10759941(1)	rs2149355(1)	rs2149353(1)	rs3945581(1)	rs7848124(1)	rs1887780(1)	rs4837502(1)	rs4837503(1)	rs10983772(1)	rs10114960(1)	rs10123941(1)	rs10123955(1)	rs10118506(1)	rs10124632(1)	rs1927902(1)	rs1927900(1)	rs1927899(1)	rs7039838(1)	rs1927898(1)	rs1927897(1)	rs1927896(1)	rs4259480(1)	rs4595203(1)	rs7026297(1)	rs7026522(1)	rs1927894(1)	rs1927893(1)	rs1927892(1)	rs10983776(1)	rs12337267(1)	rs10759943(1)	rs1475546(1)	rs10983783(1)	rs12342445(1)
6	rs1796518	26388672	1.04e-13	123	43	50	2	2	26	rs6933583(1)	rs9467804(1)	rs9467805(1)	rs9461273(1)	rs3800303(1)	rs9467810(1)	rs2494692(1)	rs2494696(1)	rs2101582(1)	rs2451741(1)	rs2504540(1)	rs2504571(1)	rs2504565(1)	rs2451711(1)	rs10946881(1)	rs9368480(1)	rs6918835(1)	rs6932590(1)	rs3800316(1)
11	rs7944714	88830495	1.17e-13	68	0	0	3	5	60	rs1391880(1)	rs2648640(1)	rs643566(1)	rs11821383(1)	rs12807540(1)	rs4753764(1)	rs7927169(1)	rs643304(1)	rs947883(1)	rs316086(1)	rs7938096(1)	rs7938157(1)	rs645327(1)	rs982408(1)	rs982709(1)	rs652659(1)	rs659197(1)	rs685438(1)	rs604179(1)	rs594561(1)	rs504183(1)	rs598758(1)	rs640211(1)	rs621230(1)	rs493306(1)	rs675010(1)	rs597462(1)	rs627387(1)	rs1942497(1)	rs7930256(1)	rs12363323(1)	rs4121744(1)	rs10830228(1)	rs10830231(1)	rs7127661(1)	rs10830236(1)	rs1042602(1)	rs12270717(1)	rs11018525(1)	rs17793678(1)
3	rs1381763	147791697	1.68e-13	0	0	0	0	0	0	NONE
10	rs4387244	68550523	1.98e-13	29	1	3	8	0	17	rs2394298(1)	rs4339932(1)	rs6480212(1)	rs6480213(1)	rs7358201(1)	rs4472822(1)	rs10997408(1)	rs10822931(1)	rs7921788(1)	rs4255440(1)	rs7897807(1)	rs9414946(1)	rs9415865(1)	rs9414948(1)
6	rs6938943	27376910	2.49e-13	116	15	66	1	1	33	rs12210982(1)	rs2206254(1)	rs1569566(1)	rs6908086(1)	rs10484397(1)	rs12200018(1)	rs4713101(1)	rs7754678(1)	rs6456786(1)	rs7744110(1)	rs6456788(1)	rs2235254(1)	rs726830(1)	rs12199110(1)	rs2092121(1)	rs2092122(1)	rs764460(1)	rs1883216(1)	rs7748366(1)	rs10807024(1)	rs10946920(1)	rs9468141(1)	rs12197514(1)	rs731132(1)
13	rs17051676	55838602	2.66e-13	243	18	31	4	17	173	rs2209405(1)	rs9536996(1)	rs7990908(1)	rs4548751(1)	rs9591646(1)	rs7989063(1)	rs4324025(1)	rs7326481(1)	rs9591647(1)	rs9569231(1)	rs9569232(1)	rs7999336(1)	rs9569233(1)	rs9569237(1)	rs9537016(1)	rs9537018(1)	rs2788704(1)	rs1821757(1)	rs9316772(1)	rs9527343(1)	rs9537033(1)	rs9316774(1)	rs1020036(1)	rs7320685(1)	rs1436703(1)	rs7333376(1)	rs9537037(1)	rs1436707(1)	rs7333471(1)	rs7333163(1)	rs9569253(1)	rs9569256(1)	rs9563309(1)	rs7319488(1)	rs7318491(1)	rs989199(1)	rs1370074(1)	rs7331041(1)	rs7330919(1)	rs7330906(1)
11	rs12574688	112910969	3.1e-13	11	0	0	0	0	11	rs10789932(1)
9	rs2771046	23810888	3.17e-13	39	31	0	0	0	8	rs9298850(1)
9	rs10512249	98256309	4.23e-13	16	0	5	1	1	9	rs357560(1)
2	rs6737187	226360417	6.26e-13	20	0	8	3	0	9	rs10184572(1)
3	rs827120	158039605	6.35e-13	233	56	7	19	56	95	rs11924438(1)	rs7628186(1)	rs13084451(1)	rs11707532(1)	rs4679818(1)	rs4679819(1)	rs1608103(1)	rs6441170(1)	rs1608104(1)	rs6441171(1)	rs6798355(1)	rs6441173(1)	rs1608114(1)	rs7624303(1)	rs12486445(1)	rs13072413(1)	rs6802443(1)	rs1581412(1)	rs7645383(1)	rs1724729(1)	rs1724728(1)	rs1724727(1)	rs1724725(1)	rs827156(1)	rs827152(1)	rs827150(1)	rs1624094(1)	rs827143(1)	rs852110(1)	rs1729997(1)	rs1729999(1)	rs698986(1)	rs4680421(1)	rs698978(1)	rs699922(1)	rs827123(1)	rs1724676(1)	rs827125(1)	rs699917(1)	rs699916(1)
8	rs3857914	93184065	7.67e-13	13	0	0	1	4	8	rs7839607(1)	rs1444503(1)
11	rs2071754	31812582	1.01e-12	53	1	0	6	1	45	rs169623(1)	rs11031323(1)	rs11031324(1)	rs2210144(1)	rs12788257(1)	rs2183484(1)	rs1475558(1)	rs1929019(1)	rs10835757(1)	rs7121949(1)	rs11031337(1)	rs11031342(1)	rs2616792(1)	rs2761593(1)	rs2616815(1)	rs1323738(1)	rs972714(1)	rs7940020(1)	rs7112412(1)	rs16922084(1)	rs6484501(1)	rs1535741(1)	rs578666(1)	rs6484509(1)	rs1232202(1)	rs17714935(1)	rs12421026(1)	rs3026390(1)	rs628224(1)	rs3026354(1)	rs7942007(1)	rs1540318(1)	rs4440995(1)	rs1806154(1)	rs1805270(1)	rs1806152(1)	rs11031484(1)	rs11031510(1)	rs12804456(1)	rs11031523(1)
3	rs7428430	50174184	1.17e-12	45	7	0	0	0	38	rs2352974(1)	rs11130228(1)	rs2252833(1)	rs2624819(1)	rs11130233(1)	rs2353579(1)	rs17657664(1)	rs17657688(1)	rs7628058(1)	rs6765484(1)	rs9861216(1)	rs9866695(1)	rs7621352(1)	rs9814664(1)	rs2526748(1)	rs2624824(1)	rs2245365(1)	rs2240327(1)	rs10049087(1)	rs2526754(1)	rs2240326(1)	rs2624853(1)	rs2013208(1)	rs2008877(1)	rs7642934(1)	rs11711407(1)	rs709210(1)
2	rs10181198	32686582	1.24e-12	67	2	5	3	2	55	rs206854(1)	rs4952248(1)	rs4952250(1)	rs13006495(1)	rs4952252(1)	rs6717209(1)	rs7581432(1)	rs7588883(1)	rs13427170(1)	rs212739(1)	rs212748(1)	rs212755(1)	rs212760(1)	rs10172468(1)	rs212687(1)	rs212699(1)	rs212703(1)	rs430759(1)	rs212713(1)	rs212714(1)	rs212716(1)	rs212717(1)	rs212721(1)	rs212727(1)	rs212730(1)	rs212731(1)	rs443609(1)	rs659239(1)	rs3769600(1)	rs10172510(1)	rs176403(1)	rs176416(1)	rs12992095(1)	rs12991060(1)	rs762019(1)	rs3769597(1)	rs1033751(1)	rs17820747(1)	rs10182170(1)	rs6543657(1)
1	rs707444	72949290	1.73e-12	100	9	2	1	34	54	rs2630391(1)	rs11209963(1)	rs10789339(1)	rs11209964(1)	rs2590942(1)	rs2422221(1)	rs782239(1)	rs7534013(1)	rs4649956(1)	rs12026130(1)	rs10889955(1)	rs782252(1)	rs2422222(1)	rs7535539(1)	rs782246(1)	rs782245(1)	rs782244(1)	rs782243(1)	rs782242(1)	rs2121055(1)	rs782221(1)	rs4650138(1)	rs782219(1)	rs4650139(1)	rs7523080(1)	rs1838658(1)	rs1664410(1)	rs782236(1)	rs10889956(1)	rs1807758(1)	rs7530496(1)	rs10889957(1)	rs796698(1)	rs10789340(1)	rs11209972(1)	rs12033462(1)	rs1822979(1)	rs782208(1)	rs782207(1)	rs813004(1)
11	rs10768418	38832622	2.14e-12	100	1	0	3	17	79	rs12806812(1)	rs17621211(1)	rs4271366(1)	rs4290204(1)	rs11034724(1)	rs12787240(1)	rs17621402(1)	rs17621470(1)	rs1550063(1)	rs1435161(1)	rs1435160(1)	rs1897938(1)	rs2861193(1)	rs2861198(1)	rs7928602(1)	rs10837001(1)	rs965774(1)	rs10837011(1)	rs11034859(1)	rs1552114(1)	rs2054580(1)	rs10837017(1)	rs10837021(1)	rs1038254(1)	rs11034874(1)	rs4755497(1)	rs10837022(1)	rs10837023(1)	rs11034883(1)	rs7124095(1)	rs1038258(1)	rs11034885(1)	rs10837024(1)	rs12788032(1)	rs12787122(1)	rs11601085(1)	rs10501204(1)	rs12420186(1)	rs1383743(1)	rs1026834(1)
1	rs11162988	80850574	6.1e-12	12	3	0	4	0	5	rs1340674(1)
8	rs7812870	12667421	6.75e-12	7	0	0	0	1	6	rs10888128(1)
2	rs4666994	185771745	7.3e-12	67	15	14	4	2	32	rs1593662(1)	rs725617(1)	rs1344706(1)	rs2059924(1)	rs2059923(1)	rs1583049(1)	rs6722992(1)	rs6755404(1)	rs10931156(1)	rs4667000(1)	rs4667001(1)	rs1366842(1)	rs6745533(1)	rs4667010(1)	rs1483232(1)	rs2369933(1)	rs1351711(1)	rs13410908(1)	rs9288109(1)	rs9288110(1)	rs2887591(1)	rs1038358(1)	rs1038359(1)	rs2369934(1)	rs1038361(1)	rs1483241(1)	rs2216833(1)
18	rs1895615	53701029	8.09e-12	18	10	2	2	0	4	rs1424401(1)
16	rs1424144	71349498	8.68e-12	40	9	5	0	4	22	rs1895528(1)	rs3803704(1)	rs3826247(1)	rs9928675(1)	rs12708909(1)	rs12708911(1)	rs12918378(1)	rs7195330(1)	rs9928505(1)	rs3803702(1)	rs2356414(1)	rs12599948(1)	rs6499513(1)	rs7191938(1)	rs6499515(1)
9	rs10119773	23736400	9e-12	10	1	0	0	0	9	rs10811973(1)
2	rs1995583	51226834	1.2e-11	36	8	1	0	6	21	rs17568791(1)	rs2216308(1)	rs2193410(1)	rs10195149(1)	rs10171887(1)	rs10195460(1)	rs10174990(1)	rs10174918(1)	rs17514717(1)	rs17514766(1)	rs17574342(1)	rs12612662(1)	rs12622930(1)	rs975638(1)	rs13021621(1)	rs13022010(1)
18	rs4890356	39303976	1.41e-11	83	5	3	38	15	22	rs2848763(1)	rs16975010(1)	rs16975012(1)	rs16975017(1)	rs16975020(1)	rs16975021(1)	rs16975022(1)	rs16975025(1)	rs1942065(1)	rs10502771(1)	rs8098315(1)	rs10502772(1)	rs6507424(1)	rs4404160(1)	rs8087434(1)	rs9965809(1)	rs734357(1)	rs2315174(1)	rs7229356(1)	rs1560844(1)	rs7235334(1)	rs11875076(1)	rs7237488(1)	rs1368833(1)	rs9949338(1)	rs12150815(1)	rs16975146(1)	rs734169(1)	rs8083650(1)	rs8093033(1)	rs16975169(1)	rs16975177(1)	rs16975178(1)	rs11082245(1)	rs11877634(1)	rs16975193(1)	rs16975195(1)	rs16975198(1)	rs7234764(1)	rs16975205(1)
6	rs2071303	26091336	1.51e-11	97	10	21	5	16	45	rs3799346(1)	rs1182814(1)	rs1165167(1)	rs1165165(1)	rs1165164(1)	rs1165162(1)	rs1165161(1)	rs1165159(1)	rs1165158(1)	rs556339(1)	rs442601(1)	rs199736(1)	rs9393676(1)	rs9295678(1)	rs2051541(1)	rs199726(1)	rs199739(1)	rs129129(1)	rs199753(1)	rs199752(1)	rs199751(1)	rs199750(1)	rs9358901(1)	rs1540276(1)	rs2213284(1)	rs2230655(1)	rs4401650(1)	rs1540275(1)	rs2032447(1)	rs7756117(1)	rs10425(1)	rs807212(1)	rs1572982(1)	rs12346(1)	rs6918586(1)	rs9393685(1)	rs198856(1)	rs198854(1)	rs198853(1)	rs198852(1)
8	rs7819525	92669390	1.63e-11	31	3	0	4	3	21	rs10097220(1)	rs7839679(1)	rs11985424(1)	rs4425722(1)	rs6471291(1)	rs4484646(1)	rs10101621(1)	rs4734795(1)	rs12545507(1)	rs4282524(1)	rs13255450(1)	rs9297898(1)	rs7829949(1)	rs13258512(1)	rs9643325(1)	rs9297900(1)	rs12681007(1)
12	rs10850379	110002777	1.63e-11	120	0	9	7	28	76	rs10744780(1)	rs7976839(1)	rs7958220(1)	rs7300290(1)	rs6606708(1)	rs11611358(1)	rs7958071(1)	rs7974872(1)	rs4766470(1)	rs10850131(1)	rs12581071(1)	rs11066498(1)	rs9943753(1)	rs11066503(1)	rs4766594(1)	rs11066523(1)	rs930356(1)	rs2075439(1)	rs10774692(1)	rs7970482(1)	rs10850135(1)	rs11611370(1)	rs7132057(1)	rs11066591(1)	rs3742020(1)	rs3825393(1)	rs7969719(1)	rs10774708(1)	rs918106(1)	rs2058804(1)	rs11066813(1)	rs2241215(1)	rs2287192(1)	rs11614551(1)	rs4766476(1)	rs11611011(1)	rs7298565(1)	rs7311187(1)	rs2241213(1)	rs7310945(1)
6	rs12199460	31094728	1.72e-11	22	1	8	1	6	6	rs1265063(1)	rs12153855(1)
1	rs1458023	243886673	2.01e-11	48	1	1	1	2	43	rs9428576(1)	rs10927041(1)	rs2291409(1)	rs12744297(1)	rs2125231(1)	rs12037013(1)	rs6671475(1)	rs10927046(1)	rs10754807(1)	rs2290754(1)	rs12032342(1)	rs320320(1)	rs4478795(1)	rs10803152(1)	rs10927059(1)	rs7517921(1)	rs12140040(1)	rs12143245(1)	rs10927060(1)	rs2034915(1)	rs12144546(1)	rs2125230(1)	rs9782883(1)	rs4553169(1)	rs12031994(1)	rs971285(1)	rs2345994(1)	rs1531244(1)	rs4132509(1)	rs6672195(1)	rs4518884(1)	rs10927081(1)	rs10157763(1)	rs4590656(1)	rs4430311(1)
3	rs1051436	88101530	2.33e-11	142	0	5	14	0	123	rs12106679(1)	rs2116149(1)	rs1063597(1)	rs1006896(1)	rs3732776(1)	rs2735556(1)	rs1006895(1)	rs2735559(1)	rs2049817(1)	rs959050(1)	rs4858981(1)	rs4858983(1)	rs13098157(1)	rs4611846(1)	rs4858985(1)	rs9310067(1)	rs4858994(1)	rs9834501(1)	rs7618472(1)	rs11128021(1)	rs9881255(1)	rs6792208(1)	rs9310072(1)	rs9310074(1)	rs4429658(1)	rs6551271(1)	rs6804818(1)	rs7620830(1)	rs7651999(1)	rs6787824(1)	rs4858931(1)	rs12493327(1)	rs4858998(1)	rs4580585(1)	rs4858999(1)	rs4337654(1)	rs4414876(1)	rs4596173(1)	rs4518156(1)	rs9813894(1)
18	rs7236335	52475073	2.42e-11	85	1	3	25	19	37	rs664501(1)	rs1451949(1)	rs1451948(1)	rs10163741(1)	rs1155789(1)	rs1077551(1)	rs1077550(1)	rs9963215(1)	rs7237990(1)	rs1451940(1)	rs1451939(1)	rs1562948(1)	rs723940(1)	rs1530900(1)	rs2060817(1)	rs2060816(1)	rs4801003(1)	rs1451937(1)	rs9319748(1)	rs4800935(1)	rs1451950(1)	rs4801008(1)	rs9959059(1)	rs7227268(1)	rs4801011(1)	rs4477812(1)	rs1017622(1)	rs4577186(1)	rs988733(1)	rs11151646(1)	rs7237206(1)	rs7506817(1)	rs13381509(1)	rs9964078(1)	rs4801024(1)	rs4800947(1)	rs1972598(1)	rs11151976(1)	rs2311212(1)	rs12956208(1)
3	rs7622860	18795765	2.46e-11	98	23	29	2	3	41	rs183501(1)	rs9855153(1)	rs9848614(1)	rs9310571(1)	rs4327409(1)	rs7624323(1)	rs7633180(1)	rs6799759(1)	rs5021426(1)	rs13084910(1)	rs6794713(1)	rs11914608(1)	rs11128900(1)	rs4635727(1)	rs13088994(1)	rs12106877(1)	rs4261897(1)	rs7640522(1)	rs4613476(1)	rs9873038(1)	rs4605565(1)	rs9866257(1)	rs140640(1)	rs9849719(1)	rs9284846(1)	rs9310574(1)	rs9310575(1)	rs9835977(1)	rs9827285(1)	rs9837920(1)	rs9858347(1)	rs9842678(1)	rs9862868(1)	rs9863496(1)	rs9824781(1)
1	rs6679408	50591565	2.61e-11	104	4	34	38	4	24	rs1343424(1)	rs768328(1)	rs12036714(1)	rs12049328(1)	rs7528510(1)	rs12124042(1)	rs7546830(1)	rs241463(1)	rs733702(1)	rs1431638(1)	rs241501(1)	rs241472(1)	rs241460(1)	rs12036551(1)	rs1494461(1)	rs1494462(1)	rs241467(1)	rs2356392(1)	rs12725943(1)	rs1766377(1)	rs950562(1)	rs1167264(1)	rs4926814(1)	rs2103266(1)	rs1343159(1)	rs4408195(1)	rs1112368(1)	rs978178(1)	rs1474910(1)	rs3903685(1)	rs10788917(1)	rs3899856(1)	rs6588369(1)	rs12047155(1)	rs5005268(1)	rs9659092(1)	rs4259707(1)	rs12118183(1)	rs12733544(1)	rs10888679(1)
2	rs6719001	203777903	2.76e-11	68	46	2	8	0	12	rs1949675(1)	rs6725887(1)	rs6435169(1)	rs7582720(1)	rs7560547(1)	rs1541853(1)	rs4675310(1)	rs2351524(1)	rs10176600(1)
7	rs6965740	117514840	3.22e-11	42	4	0	0	0	38	rs2024492(1)	rs7801876(1)	rs1468183(1)	rs7784849(1)	rs2402295(1)	rs10226992(1)	rs7793280(1)	rs2051750(1)	rs10487381(1)	rs6968012(1)	rs12706166(1)	rs10232053(1)	rs10278862(1)	rs10235515(1)	rs13226962(1)	rs1548458(1)	rs10241640(1)	rs10215788(1)	rs763890(1)	rs10258900(1)	rs10246758(1)	rs4419753(1)	rs7456706(1)	rs10245641(1)	rs7788371(1)	rs12537079(1)	rs10258170(1)
20	rs3765459	44757407	3.34e-11	13	0	0	0	1	12	rs6073993(1)	rs6074044(1)
16	rs217180	72184629	3.34e-11	74	1	1	10	17	45	rs8063760(1)	rs11648240(1)	rs4788547(1)	rs4788817(1)	rs4788821(1)	rs3752681(1)	rs8203(1)	rs1058747(1)	rs1582589(1)	rs2303224(1)	rs10500559(1)	rs1035545(1)	rs3925658(1)	rs4788826(1)	rs11539980(1)	rs951453(1)	rs2270832(1)	rs2270831(1)	rs12447856(1)	rs9939455(1)	rs8062477(1)	rs4788567(1)	rs952159(1)	rs6499557(1)	rs7203426(1)	rs2070937(1)	rs2241411(1)	rs3812986(1)	rs4788609(1)	rs3852782(1)	rs10852511(1)	rs3852784(1)	rs3844425(1)	rs7197154(1)	rs1837020(1)	rs1946768(1)	rs9929435(1)	rs9939039(1)	rs7200367(1)	rs6499568(1)
14	rs10138360	75293386	3.75e-11	144	73	2	5	8	56	rs7150659(1)	rs752857(1)	rs2302832(1)	rs9671386(1)	rs12587457(1)	rs6574190(1)	rs17782683(1)	rs8004430(1)	rs12889955(1)	rs12887044(1)	rs12588415(1)	rs8022046(1)	rs10144860(1)	rs8011071(1)	rs2058918(1)	rs12888998(1)	rs11159104(1)	rs10148293(1)	rs973879(1)	rs11159105(1)	rs12147629(1)	rs8008785(1)	rs3742790(1)	rs4899536(1)	rs10483863(1)	rs8014204(1)	rs17102847(1)	rs2359239(1)	rs722599(1)	rs2359240(1)	rs929579(1)	rs1319171(1)	rs11851433(1)	rs4903262(1)	rs10083386(1)	rs2300596(1)	rs2300599(1)	rs17093914(1)	rs2080087(1)	rs731952(1)
6	rs4712371	19227667	3.96e-11	63	2	1	16	6	38	rs9383456(1)	rs4144554(1)	rs1007239(1)	rs2064177(1)	rs9465279(1)	rs9295421(1)	rs9465305(1)	rs1858513(1)	rs12190312(1)	rs1858512(1)	rs12205682(1)	rs9460316(1)	rs9460319(1)	rs4712374(1)	rs9465325(1)	rs1338443(1)	rs10214554(1)	rs9460332(1)	rs16882003(1)	rs12529149(1)	rs11968104(1)	rs16882031(1)	rs10484423(1)	rs12662236(1)	rs16882045(1)	rs7754113(1)	rs7750346(1)	rs7770791(1)	rs7756048(1)	rs9460337(1)	rs9465338(1)	rs10081157(1)	rs9465339(1)	rs9465343(1)	rs7773088(1)	rs6911832(1)	rs9465358(1)	rs9465360(1)	rs4710902(1)	rs9465361(1)
15	rs17652674	38900312	4.14e-11	33	0	0	0	4	29	rs11073332(1)	rs11636580(1)	rs11073340(1)	rs1495184(1)	rs12912299(1)	rs16967104(1)	rs17574546(1)	rs16967112(1)	rs924005(1)	rs7171171(1)	rs7173588(1)	rs883625(1)	rs16967120(1)	rs17653133(1)	rs17575006(1)	rs17575173(1)	rs7173718(1)	rs8024280(1)	rs17653420(1)	rs17575571(1)	rs17653702(1)	rs16967167(1)
9	rs7036984	96200540	4.18e-11	27	0	0	13	1	13	rs16909150(1)	rs12551314(1)	rs2001609(1)	rs7033532(1)	rs7038310(1)	rs7038293(1)	rs3829059(1)	rs1963(1)	rs10992845(1)	rs12552323(1)	rs6479502(1)	rs6479503(1)	rs12554279(1)	rs12551797(1)	rs12552939(1)	rs12551079(1)
18	rs618869	53248151	4.34e-11	25	3	0	0	1	21	rs611439(1)	rs931040(1)	rs9947593(1)	rs12456030(1)	rs2126788(1)	rs958714(1)	rs1382118(1)	rs1382117(1)	rs2126787(1)	rs1031830(1)	rs2221526(1)
11	rs4414202	28709434	4.42e-11	6	1	0	0	2	3	rs11030414(1)
5	rs4463213	139545748	4.7e-11	63	4	0	28	0	31	rs7705932(1)	rs10038443(1)	rs37355(1)	rs2337131(1)	rs7727069(1)	rs2436399(1)	rs373564(1)	rs17286613(1)	rs2436390(1)	rs12717954(1)	rs13178142(1)	rs10060071(1)	rs4913072(1)	rs13175916(1)	rs4913073(1)	rs10055141(1)	rs10477333(1)	rs919749(1)	rs17286641(1)	rs13353859(1)	rs13163983(1)	rs7717576(1)	rs4912707(1)	rs9042(1)	rs7730245(1)	rs1864970(1)	rs13161154(1)	rs6867870(1)	rs17118781(1)	rs7737543(1)	rs2053055(1)	rs6580473(1)	rs17118785(1)	rs6889283(1)	rs2116790(1)	rs3777095(1)	rs12187444(1)	rs1347143(1)	rs1529693(1)	rs13185866(1)
2	rs13409521	22155180	4.83e-11	23	0	0	1	0	22	rs994724(1)	rs6548001(1)	rs17674649(1)	rs2139352(1)	rs2176696(1)	rs1356704(1)	rs7588317(1)	rs10206997(1)	rs7575276(1)	rs1401651(1)	rs7595937(1)	rs329783(1)
3	rs9846102	51879687	5.38e-11	8	0	0	0	0	8	rs916288(1)
5	rs12657057	107050754	5.67e-11	33	2	0	6	3	22	rs591470(1)	rs3864269(1)	rs26724(1)	rs26726(1)	rs42449(1)	rs17160272(1)	rs12187753(1)	rs17160287(1)	rs1572255(1)	rs17351315(1)	rs7732784(1)	rs7705512(1)	rs13159331(1)	rs7724655(1)	rs1490839(1)	rs12654281(1)	rs6864800(1)	rs35521(1)	rs1352724(1)	rs35520(1)
20	rs6030812	42001011	5.95e-11	10	1	1	2	2	4	rs4810379(1)
9	rs687434	127643456	6.2e-11	60	6	9	2	5	38	rs876663(1)	rs2810467(1)	rs589748(1)	rs10760392(1)	rs10986565(1)	rs10819030(1)	rs7856303(1)	rs10819033(1)	rs6478696(1)	rs7860360(1)	rs6478697(1)	rs7867094(1)	rs10986578(1)	rs7021901(1)	rs972299(1)	rs972301(1)	rs4838247(1)	rs2113352(1)	rs6744(1)	rs1549314(1)	rs1048251(1)	rs4838250(1)	rs7019234(1)	rs1517411(1)	rs397583(1)	rs466994(1)	rs459311(1)	rs465689(1)	rs10760394(1)	rs420423(1)	rs359590(1)	rs4289914(1)	rs5015933(1)	rs3104546(1)
7	rs2189246	82444372	6.43e-11	80	14	5	1	13	47	rs1476547(1)	rs6955428(1)	rs6954078(1)	rs6975132(1)	rs2522830(1)	rs2051791(1)	rs2214415(1)	rs2522831(1)	rs2715147(1)	rs2715148(1)	rs2522832(1)	rs1044639(1)	rs2522833(1)	rs2371214(1)	rs2715150(1)	rs2715152(1)	rs2522834(1)	rs2715155(1)	rs2715156(1)	rs13237603(1)	rs13224221(1)	rs10954694(1)	rs10243189(1)	rs7781142(1)	rs6467915(1)	rs6467917(1)	rs6467919(1)	rs6467922(1)	rs1034780(1)	rs976714(1)	rs10954696(1)	rs10487648(1)	rs999435(1)	rs1001594(1)	rs12113820(1)	rs41583(1)	rs41584(1)	rs41586(1)	rs41590(1)	rs41591(1)
7	rs6978677	75636240	6.66e-11	55	8	3	8	1	35	rs2868177(1)	rs7788763(1)	rs11983987(1)	rs2302437(1)	rs3757593(1)	rs1639609(1)	rs1104879(1)	rs1104878(1)	rs867973(1)	rs3779419(1)	rs1639617(1)	rs1639620(1)	rs11982200(1)	rs4398845(1)	rs4552844(1)	rs1637051(1)	rs10085567(1)	rs10245584(1)	rs10264760(1)	rs10271413(1)	rs4732595(1)	rs11764129(1)	rs11763076(1)	rs13438599(1)	rs6953665(1)	rs10227345(1)	rs4728614(1)	rs11971220(1)	rs11975745(1)	rs10952869(1)	rs11984438(1)	rs7793844(1)	rs6950229(1)
4	rs4295278	123547541	6.82e-11	13	0	0	0	10	3	rs7693745(1)	rs1398553(1)
11	rs2758705	29784830	7.1e-11	35	2	0	2	3	28	rs10835550(1)	rs12146467(1)	rs12146546(1)	rs11030790(1)	rs322614(1)	rs4923610(1)	rs11030797(1)	rs1946665(1)	rs9300004(1)	rs2680291(1)	rs11030800(1)	rs10835566(1)	rs10835567(1)	rs10835568(1)	rs10835571(1)	rs12361299(1)	rs16919818(1)	rs12290129(1)	rs10835584(1)	rs11030826(1)	rs11030828(1)	rs12293643(1)
2	rs12998761	144158465	8.49e-11	25	1	0	1	1	22	rs12612084(1)	rs11690735(1)	rs13013016(1)	rs12478031(1)	rs3795872(1)	rs4560048(1)	rs12464672(1)	rs12996951(1)	rs6731065(1)	rs13020925(1)	rs12615880(1)	rs4662336(1)	rs6727288(1)
2	rs1267067	162007748	8.71e-11	10	4	0	1	2	3	rs17705608(1)
8	rs10092600	8649023	9.24e-11	117	1	3	7	8	98	rs2979234(1)	rs17681427(1)	rs17154339(1)	rs17154351(1)	rs17154381(1)	rs11786469(1)	rs10110074(1)	rs10113481(1)	rs11784987(1)	rs7812973(1)	rs17154405(1)	rs12675028(1)	rs2409047(1)	rs11777726(1)	rs17154423(1)	rs17154449(1)	rs11250215(1)	rs6986287(1)	rs6981638(1)	rs13267501(1)	rs10110591(1)	rs9329165(1)	rs9329166(1)	rs10088439(1)	rs4841017(1)	rs13256369(1)	rs11780672(1)	rs777705(1)	rs11776981(1)	rs11780486(1)	rs11783707(1)	rs11781985(1)	rs11777742(1)	rs11777908(1)	rs570364(1)	rs570396(1)	rs571130(1)	rs11783944(1)	rs11786474(1)	rs11785741(1)
5	rs7349809	152096727	9.5e-11	126	10	1	9	36	70	rs17451455(1)	rs4407620(1)	rs4475248(1)	rs4569857(1)	rs17549307(1)	rs4958559(1)	rs2961747(1)	rs12654265(1)	rs2964249(1)	rs2961745(1)	rs17549488(1)	rs2961741(1)	rs10036750(1)	rs10045463(1)	rs6876403(1)	rs6876723(1)	rs4958560(1)	rs2964231(1)	rs4958561(1)	rs2961765(1)	rs2961766(1)	rs12188564(1)	rs4478308(1)	rs10155517(1)	rs2961760(1)	rs4580766(1)	rs2964223(1)	rs4958316(1)	rs4958317(1)	rs6871986(1)	rs17453481(1)	rs6868331(1)	rs10046082(1)	rs4360032(1)	rs4557395(1)	rs4958320(1)	rs4958562(1)	rs10476785(1)	rs17453740(1)	rs17453775(1)
7	rs7810841	21533758	9.95e-11	12	0	0	1	0	11	rs2282893(1)
2	rs3914722	50991039	1.11e-10	44	12	1	6	11	14	rs889841(1)	rs17041047(1)	rs3914732(1)	rs17503799(1)	rs17569242(1)	rs3914729(1)	rs3914730(1)	rs11125326(1)	rs17569702(1)	rs17504263(1)	rs9636437(1)	rs9645152(1)	rs17569799(1)	rs17041068(1)	rs17504439(1)	rs10460542(1)	rs17504635(1)	rs10490174(1)	rs1558799(1)	rs17505013(1)
11	rs1499040	88396177	1.14e-10	80	0	7	15	8	50	rs16914045(1)	rs12273907(1)	rs1552739(1)	rs973716(1)	rs11826393(1)	rs1875797(1)	rs11826538(1)	rs4753106(1)	rs4753505(1)	rs10501668(1)	rs11828996(1)	rs10501670(1)	rs2133395(1)	rs1504088(1)	rs3337(1)	rs7942741(1)	rs7126211(1)	rs1491891(1)	rs1504093(1)	rs1504091(1)	rs12785879(1)	rs12787273(1)	rs10501673(1)	rs1874946(1)	rs10831171(1)	rs7479024(1)	rs12786297(1)	rs4753616(1)	rs12797757(1)	rs7483691(1)	rs10831241(1)	rs1499041(1)	rs10765691(1)	rs10501676(1)	rs1948664(1)	rs4439512(1)	rs11020959(1)	rs7949475(1)	rs11020962(1)	rs11020963(1)
18	rs356926	26329054	1.25e-10	132	0	1	6	45	80	rs17749446(1)	rs8083405(1)	rs16945065(1)	rs7244544(1)	rs10502511(1)	rs1354420(1)	rs2068732(1)	rs1692516(1)	rs1496485(1)	rs1390692(1)	rs1692522(1)	rs1785765(1)	rs16945100(1)	rs356865(1)	rs356877(1)	rs356825(1)	rs1685060(1)	rs1518587(1)	rs579991(1)	rs526891(1)	rs502215(1)	rs2171324(1)	rs509170(1)	rs12458315(1)	rs734676(1)	rs486126(1)	rs570907(1)	rs568405(1)	rs12965885(1)	rs514526(1)	rs12454606(1)	rs522703(1)	rs578518(1)	rs1464217(1)	rs515363(1)	rs573582(1)	rs580443(1)	rs2460095(1)	rs2460094(1)	rs570267(1)
3	rs6802567	43537085	1.27e-10	70	18	0	3	4	45	rs1320155(1)	rs7639584(1)	rs9311335(1)	rs13074235(1)	rs1320158(1)	rs2372356(1)	rs4419357(1)	rs17254786(1)	rs7633546(1)	rs9852399(1)	rs4260403(1)	rs1573931(1)	rs6808396(1)	rs6767019(1)	rs1996497(1)	rs1317402(1)	rs1320160(1)	rs17075415(1)	rs1320162(1)	rs1320163(1)	rs2372361(1)	rs17473118(1)	rs906155(1)	rs7651078(1)	rs17473616(1)	rs10510737(1)	rs6772068(1)	rs17474028(1)	rs17075754(1)	rs6763411(1)	rs17409162(1)	rs1842805(1)	rs17075829(1)	rs6800306(1)	rs6762850(1)	rs7617071(1)	rs9831055(1)	rs17320869(1)	rs3733156(1)	rs9831161(1)
8	rs7842138	77632017	1.28e-10	25	0	0	0	4	21	rs6472979(1)	rs6472982(1)	rs6993709(1)	rs6472983(1)	rs4503074(1)	rs11778332(1)	rs9918736(1)	rs10957815(1)	rs7016169(1)	rs16939355(1)	rs11782906(1)	rs10504641(1)	rs16939360(1)	rs16939379(1)
1	rs10912807	174516366	1.38e-10	202	49	4	12	34	103	rs12140760(1)	rs1322777(1)	rs16846546(1)	rs7525115(1)	rs1322780(1)	rs10489894(1)	rs6691053(1)	rs2295957(1)	rs2759328(1)	rs5877(1)	rs2227607(1)	rs941988(1)	rs2227592(1)	rs2227589(1)	rs1884994(1)	rs6685314(1)	rs12563301(1)	rs10912728(1)	rs7553788(1)	rs17350956(1)	rs4650939(1)	rs17353198(1)	rs17350991(1)	rs4233169(1)	rs1407127(1)	rs12085290(1)	rs2901785(1)	rs6676161(1)	rs12079214(1)	rs12065785(1)	rs16846718(1)	rs10912735(1)	rs3086(1)	rs12060460(1)	rs2142864(1)	rs6700482(1)	rs7553317(1)	rs12097252(1)	rs17301125(1)	rs17373189(1)
14	rs10138108	42161283	1.52e-10	99	1	7	10	10	71	rs12892562(1)	rs8020581(1)	rs1950829(1)	rs1983711(1)	rs712405(1)	rs853237(1)	rs10138326(1)	rs7148077(1)	rs8009481(1)	rs1900599(1)	rs2121708(1)	rs10150151(1)	rs11627839(1)	rs11623805(1)	rs10131184(1)	rs12879030(1)	rs17112192(1)	rs7143254(1)	rs17112197(1)	rs17112198(1)	rs17181588(1)	rs17781325(1)	rs935490(1)	rs17181601(1)	rs17181608(1)	rs17181622(1)	rs17781361(1)	rs8015451(1)	rs17181636(1)	rs1597049(1)	rs12435558(1)	rs4904776(1)	rs7146404(1)	rs4904786(1)	rs4904790(1)	rs12147155(1)	rs7154241(1)	rs1992852(1)	rs1992851(1)	rs12881970(1)
14	rs944376	57367706	1.55e-10	19	0	0	5	8	6	rs11622451(1)	rs850279(1)	rs9646156(1)	rs709970(1)	rs709976(1)	rs709977(1)	rs850269(1)	rs17719756(1)
2	rs1374369	176721984	1.86e-10	5	1	0	2	0	2	rs1446662(1)
4	rs6448556	28001862	1.92e-10	84	2	9	1	16	56	rs7684360(1)	rs1609118(1)	rs6838794(1)	rs2309673(1)	rs2110506(1)	rs1527345(1)	rs2056721(1)	rs6850690(1)	rs1527327(1)	rs10008767(1)	rs7441199(1)	rs13139702(1)	rs7671081(1)	rs13102269(1)	rs13109572(1)	rs13109780(1)	rs4487325(1)	rs7667827(1)	rs10011003(1)	rs10033212(1)	rs9291508(1)	rs6812941(1)	rs6813843(1)	rs6839082(1)	rs6839094(1)	rs13111817(1)	rs1405671(1)	rs10028553(1)	rs6824459(1)	rs6824779(1)	rs6850823(1)	rs6858327(1)	rs7681515(1)	rs10031833(1)	rs6817095(1)	rs2037768(1)	rs7659809(1)	rs11724556(1)	rs7671258(1)	rs7671186(1)
11	rs7942392	113191428	1.99e-10	11	3	0	1	6	1	rs4255568(1)
12	rs16927047	24192371	2.11e-10	31	3	1	2	0	25	rs2971158(1)	rs7978875(1)	rs17405551(1)	rs17405662(1)	rs7305474(1)	rs7132135(1)	rs7302982(1)	rs7303117(1)	rs11047241(1)	rs1391791(1)	rs12828700(1)	rs17485141(1)	rs7964057(1)	rs7306437(1)	rs7978583(1)	rs1498885(1)
2	rs779995	125012321	2.2e-10	67	6	0	0	25	36	rs960537(1)	rs7594531(1)	rs1170629(1)	rs1170630(1)	rs1170634(1)	rs891409(1)	rs1170602(1)	rs1170606(1)	rs2163249(1)	rs2699360(1)	rs2699359(1)	rs1170610(1)	rs6541945(1)	rs1170611(1)	rs1170612(1)	rs1170617(1)	rs1184930(1)	rs1170619(1)	rs749196(1)	rs1170621(1)	rs1170622(1)	rs1170623(1)	rs1170624(1)	rs1170626(1)	rs1170627(1)	rs1170628(1)	rs779994(1)	rs779985(1)	rs780044(1)	rs1919840(1)	rs1186396(1)	rs1170578(1)	rs779977(1)	rs1186066(1)	rs780026(1)	rs780029(1)	rs780030(1)	rs780031(1)	rs780032(1)	rs780034(1)
8	rs876575	131210851	2.39e-10	174	25	8	30	30	81	rs2306528(1)	rs2046260(1)	rs298602(1)	rs1467048(1)	rs2060985(1)	rs2060984(1)	rs2060983(1)	rs1466226(1)	rs874617(1)	rs2005030(1)	rs747498(1)	rs747499(1)	rs2085066(1)	rs16904190(1)	rs16904191(1)	rs4733566(1)	rs11780495(1)	rs6470790(1)	rs6470791(1)	rs7820954(1)	rs1902016(1)	rs4733761(1)	rs12675865(1)	rs2395988(1)	rs4461944(1)	rs4236749(1)	rs3758028(1)	rs7460645(1)	rs4733568(1)	rs2045092(1)	rs2045091(1)	rs16904197(1)	rs2123870(1)	rs16904199(1)	rs12546088(1)	rs2395989(1)	rs7386417(1)	rs12546603(1)	rs7015970(1)	rs4733569(1)
5	rs7710751	61504389	2.43e-10	156	3	20	28	31	74	rs4498216(1)	rs2961835(1)	rs2940585(1)	rs2961836(1)	rs9291749(1)	rs2962028(1)	rs2962027(1)	rs2910474(1)	rs1423131(1)	rs2910476(1)	rs2961838(1)	rs1876683(1)	rs987960(1)	rs10051806(1)	rs10038739(1)	rs1559211(1)	rs1423120(1)	rs11953146(1)	rs17366217(1)	rs10471539(1)	rs7710965(1)	rs12521971(1)	rs10514933(1)	rs4700486(1)	rs4099245(1)	rs9291756(1)	rs4700004(1)	rs1995782(1)	rs10067200(1)	rs3846467(1)	rs12659793(1)	rs12659814(1)	rs10062387(1)	rs2344395(1)	rs6449593(1)	rs4145851(1)	rs4700006(1)	rs3822485(1)	rs2344396(1)	rs7711530(1)
16	rs10500326	4918326	2.77e-10	34	1	4	1	2	26	rs12932724(1)	rs3747614(1)	rs17770918(1)	rs7185773(1)	rs7186159(1)	rs17137352(1)	rs8055703(1)	rs17771245(1)	rs17771656(1)	rs2660228(1)	rs2660229(1)	rs7214(1)	rs17137389(1)	rs1049208(1)	rs2075637(1)	rs8060738(1)	rs1049205(1)	rs12921187(1)
11	rs12417996	16334993	3.12e-10	22	8	0	2	0	12	rs11023759(1)	rs17553733(1)	rs7933830(1)
5	rs1921111	30870858	3.65e-10	72	27	0	1	19	25	rs1392452(1)	rs7704589(1)	rs1532619(1)	rs1532618(1)	rs1500210(1)	rs1353960(1)	rs1604101(1)	rs1604100(1)	rs2173693(1)	rs1547531(1)	rs1547530(1)	rs1532617(1)	rs6450796(1)	rs6450797(1)	rs6450798(1)	rs10940923(1)	rs2178490(1)	rs12653322(1)	rs6891352(1)	rs13158207(1)	rs12517434(1)	rs11740543(1)	rs4279348(1)	rs1921115(1)	rs1500174(1)	rs1732945(1)	rs1631184(1)	rs1392426(1)	rs1392424(1)	rs1732939(1)	rs1732938(1)	rs1617043(1)	rs1732927(1)	rs17603912(1)
1	rs650440	66580943	3.95e-10	31	0	0	0	4	27	rs4503327(1)	rs2503199(1)	rs2503197(1)	rs6588179(1)	rs6588180(1)	rs2228692(1)	rs7556303(1)	rs1392811(1)	rs12742079(1)	rs11583733(1)	rs2455016(1)	rs4004(1)	rs680925(1)	rs7412571(1)	rs518938(1)	rs12745871(1)	rs594094(1)	rs544024(1)	rs1577844(1)	rs599235(1)
11	rs2513590	113724943	4.13e-10	58	0	0	1	3	54	rs7940164(1)	rs11600717(1)	rs11602934(1)	rs11601890(1)	rs11607594(1)	rs11607622(1)	rs11607747(1)	rs11606746(1)	rs1355202(1)	rs11605078(1)	rs11605119(1)	rs11600908(1)	rs11606211(1)	rs11606336(1)	rs11607704(1)	rs17611093(1)	rs17611127(1)	rs11602210(1)	rs11604194(1)	rs17532884(1)	rs11607690(1)	rs11600570(1)	rs11601425(1)	rs17612378(1)	rs11607718(1)	rs11604887(1)	rs17541000(1)	rs17613359(1)	rs17613838(1)	rs17614338(1)	rs1713674(1)	rs1633548(1)	rs2513574(1)	rs2715791(1)	rs756701(1)	rs2513567(1)	rs2428016(1)	rs2513577(1)	rs2428011(1)	rs2513573(1)
10	rs2031142	10846404	4.32e-10	4	2	0	0	1	1	rs9424110(1)
16	rs682517	77103137	4.44e-10	42	15	2	2	3	20	rs4243133(1)	rs285027(1)	rs1485794(1)	rs589002(1)	rs4544253(1)	rs664408(1)	rs662101(1)	rs1683399(1)	rs1631193(1)	rs633316(1)	rs4888608(1)	rs12444881(1)	rs2278048(1)	rs8061864(1)
9	rs17794133	11547243	4.48e-10	196	17	21	8	9	141	rs10809270(1)	rs4288460(1)	rs985157(1)	rs4288456(1)	rs7865064(1)	rs7851603(1)	rs10959468(1)	rs1981078(1)	rs10809296(1)	rs12376116(1)	rs12376138(1)	rs10809326(1)	rs10809328(1)	rs11788082(1)	rs10959634(1)	rs1489185(1)	rs9298667(1)	rs10809395(1)	rs7034246(1)	rs901988(1)	rs10959764(1)	rs1414215(1)	rs2382296(1)	rs10959780(1)	rs1335469(1)	rs1335467(1)	rs7045135(1)	rs9407479(1)	rs9407480(1)	rs1335465(1)	rs1335462(1)	rs4364730(1)	rs10959793(1)	rs12376585(1)	rs10959797(1)	rs11795259(1)	rs4741156(1)	rs9406426(1)	rs10809476(1)	rs10959823(1)
4	rs2322943	143871668	4.5e-10	193	26	9	3	51	104	rs17016514(1)	rs331962(1)	rs331964(1)	rs331965(1)	rs331946(1)	rs331945(1)	rs331944(1)	rs17016768(1)	rs7679151(1)	rs7668552(1)	rs10519666(1)	rs1014464(1)	rs1992418(1)	rs6823627(1)	rs1444949(1)	rs1441417(1)	rs1441418(1)	rs6811022(1)	rs7656375(1)	rs9994364(1)	rs4690728(1)	rs4690730(1)	rs2218240(1)	rs2165502(1)	rs9308153(1)	rs716878(1)	rs1510139(1)	rs9308154(1)	rs732601(1)	rs10017013(1)	rs1876939(1)	rs17016967(1)	rs1441414(1)	rs13122590(1)	rs1012011(1)	rs1012012(1)	rs6834860(1)	rs6834625(1)	rs13136644(1)	rs10034074(1)
12	rs11068917	118791120	4.54e-10	74	2	2	7	2	61	rs16939761(1)	rs17440433(1)	rs17512219(1)	rs2280711(1)	rs1277175(1)	rs16948193(1)	rs1092854(1)	rs364823(1)	rs1151901(1)	rs418941(1)	rs16948197(1)	rs7974718(1)	rs16948204(1)	rs7303417(1)	rs11068891(1)	rs7314987(1)	rs16948230(1)	rs6490173(1)	rs16948234(1)	rs7962185(1)	rs17512407(1)	rs9943819(1)	rs7307393(1)	rs17440669(1)	rs2784(1)	rs7309671(1)	rs17512525(1)	rs17440774(1)	rs7302387(1)	rs7294498(1)	rs11068908(1)	rs12229607(1)	rs17512574(1)	rs17619932(1)	rs17512609(1)	rs11068919(1)	rs6490177(1)	rs17512644(1)	rs17440893(1)	rs2062519(1)
8	rs2975635	10143661	4.55e-10	49	17	2	0	2	28	rs17151637(1)	rs7835507(1)	rs11994805(1)	rs7835960(1)	rs17151728(1)	rs6997224(1)	rs10089244(1)	rs17151741(1)	rs17151745(1)	rs17151763(1)	rs17707988(1)	rs17708090(1)	rs17708276(1)	rs6984111(1)	rs7841921(1)	rs17710558(1)	rs7005230(1)	rs6987571(1)	rs11991832(1)
7	rs6467499	133348922	5.05e-10	165	16	15	4	7	123	rs12707087(1)	rs6968089(1)	rs1364364(1)	rs11980047(1)	rs6954975(1)	rs10755879(1)	rs2432637(1)	rs2432641(1)	rs17167160(1)	rs2991226(1)	rs4731968(1)	rs17167168(1)	rs17167170(1)	rs17658042(1)	rs9641952(1)	rs10239061(1)	rs10239077(1)	rs9641953(1)	rs6956399(1)	rs11764989(1)	rs2042000(1)	rs12540206(1)	rs17167187(1)	rs2911495(1)	rs11763756(1)	rs11768150(1)	rs7777805(1)	rs2066924(1)	rs6955530(1)	rs2430768(1)	rs2345943(1)	rs763645(1)	rs7792396(1)	rs7776986(1)	rs10266435(1)	rs10231828(1)	rs2430769(1)	rs7803626(1)	rs10808271(1)	rs7794168(1)
1	rs12133062	18433355	5.09e-10	2	0	0	0	0	2	rs12144931(1)
7	rs13226841	126389408	5.72e-10	201	0	2	7	27	165	rs337901(1)	rs10254157(1)	rs1362181(1)	rs6953975(1)	rs6976095(1)	rs6976637(1)	rs6958798(1)	rs6976541(1)	rs12670259(1)	rs6976448(1)	rs2157757(1)	rs1419798(1)	rs2106198(1)	rs10243075(1)	rs10258854(1)	rs10271926(1)	rs12539616(1)	rs2188190(1)	rs2213969(1)	rs4728043(1)	rs1419458(1)	rs1419460(1)	rs712723(1)	rs6976644(1)	rs2283059(1)	rs17663074(1)	rs7797299(1)	rs10954112(1)	rs6956988(1)	rs2283064(1)	rs2839994(1)	rs17680718(1)	rs2299446(1)	rs1468098(1)	rs766240(1)	rs2237733(1)	rs17607415(1)	rs728226(1)	rs2299449(1)	rs2299452(1)
12	rs377696	125801398	5.95e-10	1	0	0	0	1	0	rs387024(1)
6	rs1770771	142961373	6.14e-10	64	2	13	19	3	27	rs6570507(1)	rs1098067(1)	rs9390007(1)	rs9484654(1)	rs9484655(1)	rs263161(1)	rs13217677(1)	rs187809(1)	rs9390009(1)	rs9390011(1)	rs1417359(1)	rs263125(1)	rs9496423(1)	rs9373355(1)	rs263152(1)	rs185523(1)	rs263146(1)	rs263142(1)	rs6909340(1)	rs6570520(1)	rs9496432(1)	rs6928084(1)	rs6902754(1)	rs9496434(1)	rs7757435(1)	rs9376702(1)	rs7760316(1)	rs6914176(1)	rs6936988(1)	rs9484661(1)	rs7739444(1)	rs11155260(1)	rs12197350(1)	rs12195495(1)	rs17071952(1)	rs9390019(1)	rs197471(1)	rs197467(1)
5	rs1566032	92398402	6.64e-10	34	0	0	0	0	34	rs13183986(1)	rs1496333(1)	rs1496332(1)	rs1353494(1)	rs13188341(1)	rs1496331(1)	rs1353492(1)	rs13163742(1)	rs959922(1)	rs6880789(1)	rs995620(1)	rs4485910(1)	rs12519773(1)	rs4502796(1)	rs4309956(1)	rs10463226(1)	rs13185751(1)	rs10514372(1)	rs4380634(1)	rs7442897(1)	rs12652645(1)	rs4869419(1)	rs4380635(1)
7	rs12700808	3384144	7.19e-10	125	29	19	10	12	55	rs1818932(1)	rs4722663(1)	rs7785994(1)	rs7803993(1)	rs12234397(1)	rs12700789(1)	rs4316064(1)	rs4343997(1)	rs7779576(1)	rs11979128(1)	rs11979842(1)	rs4607498(1)	rs7457935(1)	rs4495320(1)	rs4499989(1)	rs4416733(1)	rs12532848(1)	rs4343998(1)	rs4722695(1)	rs12537420(1)	rs12537528(1)	rs6959232(1)	rs4255031(1)	rs4443553(1)	rs4722705(1)	rs4521670(1)	rs6462030(1)	rs4236326(1)	rs4286835(1)	rs6978391(1)	rs10262464(1)	rs2140114(1)	rs1915983(1)	rs11981092(1)	rs11761186(1)	rs11771359(1)	rs7798141(1)	rs12667184(1)	rs10235815(1)	rs10258056(1)
5	rs11135357	164631708	7.53e-10	68	18	6	5	10	29	rs6879291(1)	rs4868919(1)	rs4868920(1)	rs11748440(1)	rs4868753(1)	rs13186057(1)	rs11747437(1)	rs11749187(1)	rs13165528(1)	rs11135361(1)	rs1578900(1)	rs4130574(1)	rs4367315(1)	rs1422679(1)	rs7720663(1)	rs1422680(1)	rs10064661(1)	rs10866752(1)	rs1433004(1)	rs6890742(1)	rs1541913(1)	rs12519802(1)	rs7732563(1)	rs11135362(1)	rs12186829(1)	rs1158559(1)	rs1432998(1)	rs13181181(1)	rs1432999(1)	rs11135363(1)	rs7734762(1)	rs17074967(1)	rs11135368(1)
8	rs11996715	141647291	7.7e-10	65	1	2	2	11	49	rs11996672(1)	rs4961274(1)	rs938726(1)	rs6982614(1)	rs7016981(1)	rs3802214(1)	rs7001653(1)	rs10087629(1)	rs11786030(1)	rs11786629(1)	rs9644448(1)	rs4460415(1)	rs13258420(1)	rs11783743(1)	rs13255947(1)	rs13264974(1)	rs9886378(1)	rs10089610(1)	rs13254151(1)	rs10111363(1)	rs12678285(1)	rs13253989(1)	rs10103265(1)	rs13250232(1)	rs11781072(1)	rs1349081(1)	rs13279233(1)	rs9644449(1)	rs11775547(1)	rs11167010(1)	rs13270490(1)	rs10092810(1)	rs1375062(1)	rs13259836(1)	rs10089966(1)	rs4440675(1)	rs9324539(1)	rs11990900(1)	rs10104187(1)	rs10087115(1)
5	rs6898357	166986309	8.18e-10	4	0	0	3	0	1	rs13181123(1)
16	rs7197694	77033492	8.96e-10	23	0	0	0	0	23	rs1995082(1)	rs10445054(1)	rs12600205(1)	rs11640246(1)	rs12597829(1)	rs7500211(1)	rs1393427(1)	rs1393428(1)	rs1393429(1)	rs12599233(1)	rs12597268(1)	rs12598378(1)
4	rs4698408	15659048	8.96e-10	47	14	1	0	2	30	rs11722737(1)	rs1558572(1)	rs1125378(1)	rs6812708(1)	rs2160044(1)	rs16892152(1)	rs7665390(1)	rs7661102(1)	rs10008376(1)	rs10008975(1)	rs7438356(1)	rs6414765(1)	rs4557256(1)	rs12645849(1)	rs4698402(1)	rs10022610(1)	rs13133213(1)	rs872678(1)	rs4235379(1)	rs4698409(1)	rs7665915(1)
5	rs6555203	3415406	9.01e-10	41	7	5	1	1	27	rs16871677(1)	rs423072(1)	rs103722(1)	rs2652468(1)	rs2652467(1)	rs13170639(1)	rs372157(1)	rs418502(1)	rs364458(1)	rs419252(1)	rs39973(1)	rs17683976(1)	rs412102(1)	rs413597(1)	rs4866567(1)	rs251444(1)	rs7732434(1)	rs10512699(1)
5	rs6893807	87965021	9.13e-10	26	13	2	2	3	6	rs16903275(1)
2	rs12611682	140562105	9.52e-10	30	5	5	7	4	9	rs12474301(1)	rs11677351(1)	rs10200638(1)	rs12613537(1)	rs1401935(1)	rs10179028(1)	rs9989822(1)	rs10187901(1)	rs10179767(1)
13	rs1925104	97019647	9.72e-10	110	29	27	10	10	34	rs9561932(1)	rs9302094(1)	rs9302095(1)	rs9525149(1)	rs9590371(1)	rs1327634(1)	rs4773944(1)	rs12428610(1)	rs9525156(1)	rs1927809(1)	rs764574(1)	rs7984912(1)	rs2149317(1)	rs1927808(1)	rs1927807(1)	rs9525158(1)	rs1927806(1)	rs9590373(1)	rs9516644(1)	rs9584347(1)	rs8002865(1)	rs1927790(1)	rs748457(1)	rs9554335(1)	rs1927788(1)	rs1927786(1)	rs2149315(1)	rs4773947(1)	rs9300342(1)	rs9556554(1)	rs8000148(1)	rs7320184(1)	rs4771934(1)	rs1925110(1)	rs11069237(1)	rs9556576(1)	rs7989336(1)	rs1925098(1)	rs1888977(1)	rs7321045(1)
16	rs7188399	60713434	1.04e-09	55	17	13	1	6	18	rs12919334(1)	rs1562802(1)	rs3859047(1)	rs11865343(1)	rs16962361(1)	rs7193838(1)	rs12596564(1)	rs9302725(1)	rs7184150(1)	rs12445427(1)	rs12922947(1)	rs2059250(1)	rs6500140(1)	rs8064113(1)
3	rs12629785	110198371	1.59e-09	129	0	8	45	2	74	rs12638014(1)	rs1533208(1)	rs12495182(1)	rs9871808(1)	rs1913127(1)	rs7638452(1)	rs1533212(1)	rs1533213(1)	rs13080049(1)	rs4682585(1)	rs12633668(1)	rs1398410(1)	rs4682587(1)	rs1106078(1)	rs6787448(1)	rs6788158(1)	rs13058952(1)	rs12635060(1)	rs12629741(1)	rs13065612(1)	rs2399340(1)	rs12636721(1)	rs7645972(1)	rs1949182(1)	rs1512684(1)	rs11712463(1)	rs11721302(1)	rs963346(1)	rs2203187(1)	rs11715486(1)	rs9818091(1)	rs13069621(1)	rs13070606(1)	rs4682588(1)	rs4682589(1)	rs1533191(1)	rs9846566(1)	rs9867550(1)	rs9813893(1)	rs7628857(1)
2	rs6741740	44181434	1.82e-09	40	2	1	9	2	26	rs17496251(1)	rs17031777(1)	rs11886849(1)	rs17496618(1)	rs11893433(1)	rs7565148(1)	rs12712901(1)	rs12712902(1)	rs17496638(1)	rs11124953(1)	rs17031783(1)	rs13009669(1)	rs11691326(1)	rs6544722(1)	rs17031786(1)	rs6736282(1)	rs9941657(1)	rs4276071(1)	rs17432725(1)	rs6705730(1)	rs12989909(1)	rs12990439(1)	rs13017251(1)	rs10084473(1)	rs10084400(1)	rs4131366(1)
15	rs17186555	63981327	1.86e-09	57	12	21	6	2	16	rs17765311(1)	rs17766325(1)	rs17185673(1)	rs12324009(1)	rs17185876(1)	rs10152174(1)	rs17772465(1)	rs2899695(1)	rs17186513(1)	rs17187281(1)	rs7174139(1)	rs17187564(1)	rs1039819(1)
4	rs6818081	176840816	1.87e-09	9	0	0	3	3	3	rs2333326(1)
15	rs1040148	47503152	2.07e-09	34	3	6	13	0	12	rs10519101(1)	rs8025375(1)	rs9944240(1)	rs12909443(1)	rs11858146(1)	rs1349951(1)	rs12443168(1)	rs11634896(1)	rs2045158(1)	rs11070575(1)	rs957566(1)	rs7170315(1)	rs877347(1)	rs1107930(1)
2	rs10165889	164879903	2.21e-09	109	24	17	6	16	46	rs4145309(1)	rs1516296(1)	rs2176238(1)	rs10207936(1)	rs10184267(1)	rs13396647(1)	rs1546631(1)	rs6720452(1)	rs1446475(1)	rs17351639(1)	rs4283437(1)	rs7603599(1)	rs7580181(1)	rs6707353(1)	rs6736327(1)	rs967184(1)	rs4667455(1)	rs4667456(1)	rs12476846(1)	rs12468760(1)	rs12476962(1)	rs12477932(1)	rs2034256(1)	rs6738278(1)	rs734529(1)	rs6432781(1)	rs6432782(1)	rs1838831(1)	rs12470215(1)	rs12468233(1)	rs17436622(1)	rs12469350(1)	rs6757401(1)	rs6715136(1)	rs12470648(1)	rs12470726(1)	rs1439218(1)	rs17436698(1)	rs17352171(1)	rs6732823(1)
1	rs215814	37667516	2.28e-09	25	9	4	7	0	5	rs932378(1)
1	rs12754818	79392756	2.45e-09	45	6	6	1	5	27	rs10873998(1)	rs12143905(1)	rs17403465(1)	rs12402432(1)	rs10518591(1)	rs7533063(1)	rs10158148(1)	rs12142366(1)	rs7552978(1)	rs12032838(1)	rs12738521(1)	rs17413911(1)	rs11162581(1)	rs1387422(1)	rs1387421(1)	rs1489386(1)	rs11587450(1)	rs6424621(1)	rs11162583(1)	rs1332831(1)	rs12406049(1)	rs10493622(1)
10	rs1291824	11141731	2.45e-09	32	6	7	6	9	4	rs7087513(1)	rs7099389(1)	rs7077611(1)	rs7083068(1)	rs7070530(1)	rs4354613(1)	rs12245422(1)	rs9424123(1)
6	rs4895877	130615569	2.63e-09	140	4	1	0	1	134	rs12205342(1)	rs6931937(1)	rs6911840(1)	rs7772495(1)	rs11154556(1)	rs11154557(1)	rs12189819(1)	rs4897394(1)	rs12193492(1)	rs12206915(1)	rs12193542(1)	rs12202107(1)	rs12197027(1)	rs12210502(1)	rs12197194(1)	rs2089997(1)	rs7766039(1)	rs7770566(1)	rs1849527(1)	rs12333039(1)	rs9492526(1)	rs10872358(1)	rs10872359(1)	rs11154562(1)	rs11154564(1)	rs11154565(1)	rs4897401(1)	rs4897402(1)	rs12213521(1)	rs10457548(1)	rs4897406(1)	rs12211647(1)	rs12211796(1)	rs12211846(1)	rs12211753(1)	rs12198283(1)	rs12198460(1)	rs12194113(1)	rs12213950(1)	rs11154568(1)
5	rs288159	107364363	2.73e-09	204	59	25	21	5	94	rs17437658(1)	rs288178(1)	rs288177(1)	rs288175(1)	rs288165(1)	rs288163(1)	rs2909882(1)	rs288162(1)	rs17381296(1)	rs288160(1)	rs17440818(1)	rs17440916(1)	rs288158(1)	rs288156(1)	rs7731562(1)	rs2042187(1)	rs288155(1)	rs12651724(1)	rs288153(1)	rs13357987(1)	rs4144478(1)	rs4144476(1)	rs288140(1)	rs17382278(1)	rs286748(1)	rs17441920(1)	rs502790(1)	rs289234(1)	rs2909879(1)	rs6865057(1)	rs286788(1)	rs17442211(1)	rs34415(1)	rs12654751(1)	rs12652643(1)	rs17442556(1)	rs34418(1)	rs40067(1)	rs286814(1)	rs158186(1)
5	rs1494678	3253177	2.84e-09	2	0	0	1	0	1	rs6876947(1)
7	rs4073643	104486707	2.88e-09	18	2	1	3	1	11	rs12540437(1)	rs9655780(1)	rs2299297(1)	rs1143(1)
17	rs17689882	43906828	3.07e-09	34	0	0	0	0	34	rs11012(1)	rs17689918(1)	rs16940674(1)	rs1876829(1)	rs183211(1)	rs199438(1)	rs7224296(1)	rs199454(1)	rs199442(1)	rs199529(1)	rs199528(1)	rs199524(1)	rs199520(1)	rs199514(1)	rs199513(1)	rs199509(1)	rs199507(1)	rs199506(1)	rs415430(1)	rs199505(1)	rs70602(1)	rs199504(1)	rs916888(1)
15	rs2084851	74171368	3.33e-09	27	6	9	2	1	9	rs8030745(1)
3	rs7612930	65506761	3.55e-09	14	4	0	2	2	6	rs6445480(1)
12	rs1671529	16363539	3.56e-09	54	0	0	1	0	53	rs1405513(1)	rs1913256(1)	rs7955194(1)	rs10219733(1)	rs10219493(1)	rs3847918(1)	rs2417543(1)	rs3942536(1)	rs11611696(1)	rs1527009(1)	rs7966002(1)	rs4109312(1)	rs3858681(1)	rs3847919(1)	rs3843666(1)	rs4598715(1)	rs3858682(1)	rs10772904(1)	rs10846307(1)	rs7303867(1)	rs3847920(1)	rs1624759(1)	rs10846309(1)	rs1798691(1)	rs1973824(1)	rs2204588(1)	rs7305402(1)	rs11056826(1)	rs3847921(1)	rs2417545(1)	rs6488827(1)	rs17367753(1)	rs10744107(1)	rs7298878(1)	rs10846315(1)	rs3844371(1)	rs7297372(1)	rs1852450(1)	rs3915247(1)	rs3915248(1)
18	rs674948	44181596	3.57e-09	2	0	1	0	0	1	rs675312(1)
11	rs174549	61571382	3.72e-09	33	2	3	2	4	22	rs174528(1)	rs174547(1)	rs174550(1)	rs174555(1)	rs174556(1)	rs968567(1)	rs1535(1)	rs174574(1)	rs174576(1)	rs174577(1)	rs174583(1)	rs174593(1)	rs174601(1)	rs174627(1)	rs1000778(1)	rs174464(1)	rs174476(1)
14	rs4243633	69701863	4.07e-09	26	0	0	4	11	11	rs4902677(1)	rs6573869(1)	rs10146339(1)	rs12432645(1)	rs9323524(1)	rs11622889(1)	rs11624765(1)	rs7140574(1)	rs4902708(1)	rs12433032(1)	rs12890931(1)	rs4902712(1)	rs12437334(1)	rs2185493(1)	rs1947466(1)
13	rs9537888	58551353	4.27e-09	151	46	11	23	5	66	rs6561938(1)	rs17178205(1)	rs2151825(1)	rs9537796(1)	rs9537797(1)	rs1113315(1)	rs7324317(1)	rs6561943(1)	rs9537804(1)	rs1334299(1)	rs9537818(1)	rs2320925(1)	rs12428841(1)	rs9527706(1)	rs9537821(1)	rs1041646(1)	rs1334290(1)	rs9527715(1)	rs9527716(1)	rs12430866(1)	rs11843427(1)	rs17265235(1)	rs9537842(1)	rs9537843(1)	rs9527720(1)	rs17180471(1)	rs7328662(1)	rs12430440(1)	rs12430897(1)	rs9527731(1)	rs930332(1)	rs9537861(1)	rs9537864(1)	rs4456382(1)	rs7991447(1)	rs9537868(1)	rs1978800(1)	rs1370059(1)	rs1326528(1)	rs7317710(1)
16	rs4541060	17922110	4.27e-09	24	13	0	1	2	8	rs4780677(1)
1	rs10754318	88837917	4.39e-09	65	5	20	6	4	30	rs1336573(1)	rs6679982(1)	rs481055(1)	rs517832(1)	rs6692873(1)	rs566685(1)	rs608410(1)	rs566606(1)	rs683815(1)	rs589824(1)	rs555994(1)	rs670635(1)	rs572056(1)	rs687790(1)	rs499081(1)	rs127384(1)	rs665404(1)	rs4656036(1)	rs766353(1)	rs926795(1)	rs1980518(1)	rs1156983(1)	rs2808110(1)	rs9428010(1)	rs12141716(1)	rs994452(1)	rs2808111(1)	rs693691(1)	rs17130444(1)
2	rs11686893	148495050	4.49e-09	178	78	14	16	2	68	rs1547596(1)	rs1881571(1)	rs1881570(1)	rs12616680(1)	rs1881569(1)	rs4361062(1)	rs1609365(1)	rs1406449(1)	rs4502361(1)	rs10928364(1)	rs2382108(1)	rs4641882(1)	rs1919442(1)	rs11687308(1)	rs7607970(1)	rs7581569(1)	rs1528844(1)	rs7423623(1)	rs2382109(1)	rs1528843(1)	rs2222781(1)	rs4662549(1)	rs4662550(1)	rs6757199(1)	rs13016400(1)	rs721344(1)	rs4419186(1)	rs6747792(1)	rs1895694(1)	rs17742134(1)	rs17742246(1)	rs6713811(1)	rs17742342(1)	rs7560502(1)	rs2113792(1)	rs1424941(1)	rs1469211(1)	rs3768688(1)	rs12105745(1)	rs17743157(1)
1	rs10864692	230240469	4.61e-09	15	1	8	1	0	5	rs868288(1)
11	rs7121756	57747897	4.66e-09	57	26	12	11	2	6	rs2175276(1)	rs11604305(1)	rs1823598(1)	rs1966836(1)	rs11229292(1)	rs12574405(1)	rs7129894(1)	rs7110650(1)
16	rs16958736	69353587	5.29e-09	9	1	1	2	1	4	rs9927789(1)
14	rs8018400	103901085	5.32e-09	87	20	0	8	2	57	rs1570712(1)	rs6575982(1)	rs7149767(1)	rs12879663(1)	rs4906320(1)	rs12896612(1)	rs2065018(1)	rs2065017(1)	rs12885762(1)	rs7148567(1)	rs12892062(1)	rs10144051(1)	rs12885234(1)	rs10148970(1)	rs8015723(1)	rs6575988(1)	rs12894275(1)	rs2065015(1)	rs8016676(1)	rs7156036(1)	rs17101620(1)	rs7155822(1)	rs10459573(1)	rs12185021(1)	rs4906327(1)	rs12432803(1)	rs10162425(1)	rs1116095(1)	rs8010247(1)	rs8014013(1)	rs4906329(1)	rs8012127(1)	rs11625172(1)	rs8014800(1)	rs3783397(1)	rs3783398(1)	rs12435516(1)	rs4143998(1)	rs12896919(1)	rs2756135(1)
8	rs7007784	73896742	5.33e-09	30	0	0	12	5	13	rs3894365(1)	rs7816328(1)	rs6994706(1)	rs6995325(1)	rs12677794(1)	rs17200205(1)	rs6983580(1)	rs10088657(1)	rs7012324(1)	rs6472715(1)	rs6472716(1)	rs1482029(1)	rs6994351(1)	rs7015174(1)	rs6472718(1)	rs1574690(1)	rs10104094(1)	rs6472727(1)	rs2291219(1)
16	rs11642302	24770856	5.41e-09	53	1	7	4	18	23	rs12927275(1)	rs766181(1)	rs7202252(1)	rs200536(1)	rs12925982(1)	rs200531(1)	rs200528(1)	rs200526(1)	rs11862923(1)	rs11862971(1)	rs1465422(1)	rs8049667(1)	rs12917810(1)	rs11074651(1)	rs2112785(1)	rs7204281(1)	rs7204288(1)	rs12927710(1)	rs17771137(1)	rs2343606(1)	rs1075987(1)	rs11074653(1)	rs13336754(1)	rs3803716(1)	rs874484(1)	rs1862451(1)	rs7186893(1)	rs6497760(1)	rs2112783(1)	rs2059134(1)	rs11647120(1)	rs2287783(1)	rs11646987(1)	rs12930727(1)
6	rs6928626	129354454	5.45e-09	149	17	27	16	5	84	rs13201013(1)	rs13213076(1)	rs9482960(1)	rs7770018(1)	rs17723677(1)	rs6938221(1)	rs17780950(1)	rs9398892(1)	rs9372913(1)	rs4337952(1)	rs4337953(1)	rs9388675(1)	rs4895841(1)	rs3935856(1)	rs3935350(1)	rs7758291(1)	rs9402092(1)	rs9375608(1)	rs9388677(1)	rs9375609(1)	rs9372914(1)	rs11154457(1)	rs9372915(1)	rs4576277(1)	rs4895842(1)	rs4895843(1)	rs4076090(1)	rs4295506(1)	rs9402093(1)	rs7769389(1)	rs6569575(1)	rs7771363(1)	rs4392741(1)	rs10499149(1)	rs17782500(1)	rs7750304(1)	rs6904911(1)	rs9492223(1)	rs9482982(1)	rs9492224(1)
10	rs7075669	107593400	5.5e-09	30	0	3	3	2	22	rs11192562(1)	rs2644520(1)	rs1024044(1)	rs1496077(1)	rs2683665(1)	rs2683666(1)	rs2683672(1)	rs12259847(1)	rs6584714(1)	rs866050(1)	rs541328(1)	rs521495(1)	rs821205(1)	rs489194(1)	rs481179(1)	rs821202(1)
18	rs16948053	28011290	5.51e-09	46	15	9	5	3	14	rs2949540(1)	rs16948059(1)	rs9635996(1)	rs17822171(1)	rs1442981(1)	rs7228882(1)	rs12454844(1)	rs7240469(1)	rs7245254(1)	rs7240962(1)	rs17744448(1)
5	rs17521352	124620907	6.21e-09	16	1	1	4	8	2	rs11740444(1)	rs17523117(1)	rs17523173(1)
4	rs1437261	147896553	6.38e-09	98	16	3	6	23	50	rs1875844(1)	rs952639(1)	rs1949036(1)	rs16998691(1)	rs10446756(1)	rs7674628(1)	rs7673150(1)	rs2357277(1)	rs12504096(1)	rs10519824(1)	rs2036728(1)	rs17022013(1)	rs2136366(1)	rs4835349(1)	rs2357280(1)	rs6840804(1)	rs1396718(1)	rs1876765(1)	rs1022074(1)	rs6537434(1)	rs10018635(1)	rs10011144(1)	rs6816827(1)	rs7697716(1)	rs1396717(1)	rs1396716(1)	rs7680245(1)	rs10013280(1)	rs10001365(1)	rs6852084(1)	rs7680445(1)	rs984696(1)	rs984695(1)	rs17610219(1)	rs3810844(1)	rs13122121(1)	rs13106241(1)	rs10519840(1)	rs1509333(1)	rs6834377(1)
20	rs6019826	48042970	6.42e-09	45	7	1	20	3	14	rs13044228(1)	rs6012653(1)	rs6012654(1)	rs6090977(1)	rs3787317(1)	rs11905489(1)	rs13045350(1)	rs6019827(1)	rs6095516(1)	rs6090979(1)	rs10485611(1)	rs6095521(1)	rs6012664(1)	rs6019832(1)	rs6019834(1)	rs6019838(1)	rs6019839(1)	rs6512583(1)	rs7264104(1)	rs6019841(1)	rs3787319(1)	rs742758(1)	rs6095525(1)	rs7268802(1)	rs8126190(1)	rs6019852(1)
8	rs2631007	91948156	7.08e-09	125	31	22	21	16	35	rs9643314(1)	rs7830264(1)	rs6999838(1)	rs978559(1)	rs10808632(1)	rs10808633(1)	rs997899(1)	rs997898(1)	rs12675931(1)	rs2631015(1)	rs2631014(1)	rs1011254(1)	rs1160329(1)	rs2631031(1)	rs1386112(1)	rs2740799(1)	rs1386113(1)	rs1003996(1)	rs2339289(1)	rs1542666(1)	rs2339291(1)	rs1002583(1)	rs7018395(1)	rs2740785(1)	rs2677573(1)	rs7005565(1)	rs10108486(1)	rs10112439(1)	rs10110267(1)	rs4373488(1)	rs4501548(1)	rs4501550(1)	rs9918929(1)	rs12334996(1)	rs6471265(1)	rs10956790(1)	rs10216413(1)	rs12542178(1)	rs7820904(1)	rs10111323(1)
6	rs9385869	100233278	7.23e-09	40	0	11	14	1	14	rs9402952(1)	rs4840082(1)	rs4840083(1)	rs4840084(1)	rs11969653(1)	rs10485226(1)	rs10485227(1)	rs4840086(1)	rs2894891(1)	rs4431442(1)	rs17059831(1)	rs7757887(1)	rs9373244(1)	rs6929006(1)	rs6929428(1)	rs9495576(1)	rs6931227(1)	rs7763983(1)
2	rs343969	44956905	7.26e-09	18	0	1	0	1	16	rs786180(1)	rs343936(1)	rs343954(1)	rs343952(1)	rs874543(1)	rs737448(1)
2	rs2358084	173937983	8.06e-09	35	5	0	2	12	16	rs1973037(1)	rs7573673(1)	rs989531(1)	rs1809139(1)	rs11687539(1)	rs1866634(1)	rs734993(1)	rs746179(1)	rs1816717(1)	rs935006(1)	rs17710437(1)	rs11680555(1)	rs935007(1)	rs13034748(1)	rs13035366(1)	rs3769165(1)	rs3769162(1)	rs2043950(1)	rs3769159(1)
18	rs11151379	53514843	8.12e-09	5	3	0	0	0	2	rs937831(1)
6	rs9391238	105197874	8.15e-09	119	5	24	20	3	67	rs9499909(1)	rs7772567(1)	rs13204440(1)	rs9499932(1)	rs9486002(1)	rs12110767(1)	rs9486003(1)	rs9391228(1)	rs9499934(1)	rs9404575(1)	rs9386426(1)	rs6922070(1)	rs6571200(1)	rs9386427(1)	rs9499937(1)	rs4132193(1)	rs9391229(1)	rs9499939(1)	rs7767318(1)	rs7743022(1)	rs13217175(1)	rs7770002(1)	rs7755772(1)	rs7773123(1)	rs7774512(1)	rs12524893(1)	rs11156414(1)	rs4336470(1)	rs6571202(1)	rs7741733(1)	rs9404576(1)	rs6937432(1)	rs6942231(1)	rs7770809(1)	rs7752614(1)	rs7775573(1)	rs9499948(1)	rs2400053(1)	rs2400054(1)	rs9499954(1)
3	rs6790862	178197668	8.23e-09	11	0	0	6	2	3	rs6794504(1)
12	rs10506692	74876052	8.65e-09	100	3	25	8	6	58	rs1837476(1)	rs11180022(1)	rs11180025(1)	rs10748254(1)	rs7979590(1)	rs11180031(1)	rs12316244(1)	rs11180033(1)	rs1426802(1)	rs10879769(1)	rs11180061(1)	rs10879772(1)	rs17176910(1)	rs10506690(1)	rs10506694(1)	rs1546123(1)	rs2934409(1)	rs10879806(1)	rs7307239(1)	rs2641479(1)	rs10748259(1)	rs7310142(1)	rs2199347(1)	rs2925225(1)	rs2199348(1)	rs1389496(1)	rs2605327(1)	rs3912980(1)	rs7301245(1)	rs10785134(1)	rs1493838(1)	rs17786070(1)	rs17181725(1)	rs17113889(1)	rs17786699(1)	rs2641495(1)	rs2605363(1)	rs7302481(1)	rs2201343(1)	rs17787103(1)
5	rs12523359	45193550	8.88e-09	167	99	8	24	0	36	rs10462084(1)	rs12514414(1)	rs6890289(1)	rs10941694(1)	rs12516488(1)	rs1472584(1)	rs1392970(1)	rs1909937(1)	rs12521953(1)	rs12514615(1)	rs16902083(1)	rs7732970(1)	rs13354798(1)	rs2337413(1)	rs17278764(1)	rs17344557(1)	rs2049656(1)	rs2580258(1)	rs755048(1)	rs2337483(1)	rs17344896(1)	rs6451810(1)	rs1405918(1)	rs2589162(1)	rs10512880(1)	rs6451812(1)	rs13187565(1)	rs17345947(1)	rs7705696(1)	rs2337951(1)	rs2337952(1)	rs6892627(1)	rs7718785(1)	rs12110137(1)	rs6451814(1)	rs17280692(1)	rs7706116(1)	rs4455566(1)	rs1852599(1)	rs12654213(1)
5	rs13436693	167170953	8.89e-09	15	0	0	0	4	11	rs10058151(1)	rs9313387(1)	rs6879227(1)	rs1862875(1)
16	rs16972292	71446856	8.91e-09	24	5	1	1	8	9	rs236006(1)	rs6499511(1)	rs6499512(1)	rs4788542(1)	rs9936265(1)	rs11866164(1)	rs7188299(1)
2	rs4848220	124155237	8.93e-09	104	10	3	8	3	80	rs6541897(1)	rs6723718(1)	rs1405093(1)	rs6751285(1)	rs12052848(1)	rs4848842(1)	rs13000960(1)	rs13000977(1)	rs11122978(1)	rs13035620(1)	rs1358053(1)	rs4502418(1)	rs2419735(1)	rs1568929(1)	rs7585580(1)	rs2900972(1)	rs2204506(1)	rs10460454(1)	rs10460455(1)	rs10460465(1)	rs10460466(1)	rs6750032(1)	rs9308644(1)	rs7561908(1)	rs6725441(1)	rs7587060(1)	rs2049509(1)	rs1526038(1)	rs1573943(1)	rs1405091(1)	rs1878353(1)	rs12052396(1)	rs13013491(1)	rs1358050(1)	rs11122984(1)	rs6712312(1)	rs4848856(1)	rs11683811(1)	rs11695460(1)	rs6725855(1)
3	rs6772104	71770143	9.05e-09	10	0	0	6	0	4	rs4387935(1)
1	rs2787120	33306297	9.2e-09	25	0	0	3	4	18	rs12022461(1)	rs1284366(1)	rs1300114(1)	rs1746661(1)	rs1570569(1)	rs1284373(1)	rs512005(1)	rs194637(1)	rs194640(1)	rs171837(1)	rs194641(1)	rs194648(1)	rs194651(1)	rs16835227(1)
1	rs1006598	87875774	9.49e-09	5	0	1	0	0	4	rs11582864(1)
8	rs2942194	23423669	9.54e-09	44	12	9	8	1	14	rs7846081(1)	rs2928686(1)	rs13267262(1)	rs950893(1)	rs6983724(1)	rs12549100(1)	rs13269974(1)	rs13272418(1)	rs13264439(1)	rs1858401(1)	rs11135759(1)	rs11995691(1)
1	rs11587482	8743195	9.84e-09	92	3	4	1	1	83	rs2289731(1)	rs11589090(1)	rs4908760(1)	rs751790(1)	rs1922983(1)	rs6577488(1)	rs6577489(1)	rs7551849(1)	rs12568293(1)	rs12046643(1)	rs10864354(1)	rs4908761(1)	rs7530745(1)	rs11584261(1)	rs11121194(1)	rs6577491(1)	rs6678982(1)	rs6656249(1)	rs6577496(1)	rs2144463(1)	rs12131864(1)	rs10492966(1)	rs10492965(1)	rs12136689(1)	rs6702060(1)	rs2016084(1)	rs6577502(1)	rs12122737(1)	rs1473420(1)	rs12410336(1)	rs12405049(1)	rs12122851(1)	rs11121202(1)	rs1061039(1)	rs6663123(1)	rs7537982(1)	rs1934138(1)	rs11121203(1)	rs11121204(1)	rs4908768(1)
1	rs4658597	244048656	9.96e-09	6	0	1	1	0	4	rs1914235(1)
14	rs7148456	104028270	1.11e-08	16	10	0	0	0	6	rs2296482(1)
6	rs1889556	114479520	1.13e-08	15	3	7	0	2	3	rs11153471(1)
18	rs1509222	36628201	1.15e-08	70	19	8	0	1	42	rs17598286(1)	rs16971339(1)	rs10502717(1)	rs2175064(1)	rs2175061(1)	rs16971387(1)	rs16971395(1)	rs16971404(1)	rs8083419(1)	rs16971469(1)	rs16971487(1)	rs16971498(1)	rs16971505(1)	rs1509223(1)	rs8088142(1)	rs1509224(1)	rs8093036(1)	rs1355147(1)	rs906778(1)	rs8088189(1)	rs7243236(1)	rs8097704(1)	rs7227272(1)	rs8087160(1)	rs7238994(1)	rs978807(1)	rs16971807(1)	rs1074554(1)	rs7233325(1)	rs12966646(1)	rs12963887(1)	rs16971849(1)
15	rs4887461	86982228	1.16e-08	111	5	8	1	26	71	rs884300(1)	rs1908792(1)	rs1496893(1)	rs2132659(1)	rs10220773(1)	rs1025404(1)	rs966072(1)	rs4594232(1)	rs16976562(1)	rs919592(1)	rs751526(1)	rs2116207(1)	rs4369625(1)	rs10520626(1)	rs4362360(1)	rs16976763(1)	rs8037035(1)	rs1897266(1)	rs1431237(1)	rs7168149(1)	rs1431242(1)	rs4887450(1)	rs4493015(1)	rs4513061(1)	rs4313781(1)	rs4482250(1)	rs1030550(1)	rs961187(1)	rs6496327(1)	rs4887460(1)	rs4887232(1)	rs6496331(1)	rs6496332(1)	rs6496333(1)	rs6496335(1)	rs6496336(1)	rs6496338(1)	rs4366685(1)	rs4887466(1)	rs16977283(1)
15	rs1496922	47648808	1.22e-08	38	16	0	0	6	16	rs1496923(1)	rs281253(1)	rs281254(1)	rs281255(1)	rs281262(1)	rs7183670(1)	rs16959499(1)	rs16959519(1)	rs1496896(1)	rs7171859(1)	rs16959537(1)
11	rs12274437	47886541	1.22e-08	140	0	1	10	68	61	rs11039358(1)	rs12576134(1)	rs11599936(1)	rs11600061(1)	rs4356181(1)	rs11039522(1)	rs11039528(1)	rs1566734(1)	rs1503185(1)	rs905476(1)	rs10769323(1)	rs7940877(1)	rs1393794(1)	rs1566736(1)	rs1566737(1)	rs1503174(1)	rs7933408(1)	rs10769331(1)	rs7127946(1)	rs1566730(1)	rs10838840(1)	rs1503183(1)	rs1393791(1)	rs1354293(1)	rs1503168(1)	rs1393788(1)	rs1109906(1)	rs2870509(1)	rs871248(1)	rs871249(1)	rs713325(1)	rs4752923(1)	rs960640(1)	rs10769336(1)	rs10769338(1)	rs10742851(1)	rs7932396(1)	rs11040313(1)	rs7939300(1)	rs7939316(1)
18	rs9304530	26573214	1.23e-08	65	21	12	27	0	5	rs11083293(1)	rs1539821(1)	rs4800310(1)	rs963467(1)	rs766641(1)	rs1995494(1)	rs2174269(1)	rs1504118(1)	rs720907(1)	rs7231009(1)	rs1394191(1)	rs1394189(1)	rs1504109(1)	rs12605271(1)	rs1504108(1)	rs1504107(1)	rs9964679(1)	rs12458534(1)	rs4800901(1)	rs4800902(1)	rs4800903(1)
19	rs192435	51804020	1.32e-08	22	1	1	1	14	5	rs7258998(1)	rs8111753(1)	rs8110859(1)	rs8111217(1)	rs1399838(1)	rs10419982(1)	rs1399834(1)	rs2062655(1)	rs273628(1)
4	rs2048384	140930511	1.34e-08	56	11	0	3	4	38	rs13132016(1)	rs12505942(1)	rs4863713(1)	rs4863714(1)	rs12504594(1)	rs7698089(1)	rs13109433(1)	rs4863716(1)	rs7656823(1)	rs4863717(1)	rs9996478(1)	rs9996587(1)	rs11100418(1)	rs4863720(1)	rs938022(1)	rs2048382(1)	rs17005417(1)	rs13150296(1)	rs17373621(1)	rs4863723(1)	rs12645862(1)	rs12509820(1)	rs1510719(1)	rs7674555(1)	rs6851797(1)	rs7695565(1)	rs7655582(1)	rs1402672(1)	rs17314804(1)	rs17314832(1)	rs12513045(1)	rs6850591(1)	rs11725252(1)	rs17005492(1)
16	rs6498415	13558439	1.37e-08	39	8	7	1	4	19	rs7195242(1)	rs2866478(1)	rs2903305(1)	rs2866479(1)	rs8051802(1)	rs1013040(1)	rs916069(1)	rs916070(1)	rs2078548(1)	rs16962113(1)	rs12598524(1)	rs16962221(1)	rs8057032(1)
11	rs590592	99506929	1.42e-08	132	13	9	15	14	81	rs1494470(1)	rs12792999(1)	rs17603978(1)	rs673561(1)	rs11220657(1)	rs670897(1)	rs12789908(1)	rs12790322(1)	rs591920(1)	rs668276(1)	rs12792468(1)	rs10501921(1)	rs2458164(1)	rs653186(1)	rs637387(1)	rs636073(1)	rs651048(1)	rs651496(1)	rs1790261(1)	rs1690819(1)	rs1690818(1)	rs1690817(1)	rs646067(1)	rs12789135(1)	rs634379(1)	rs634011(1)	rs606561(1)	rs594858(1)	rs631338(1)	rs594789(1)	rs619821(1)	rs619807(1)	rs670426(1)	rs669951(1)	rs605005(1)	rs657055(1)	rs655715(1)	rs1398168(1)	rs658789(1)	rs657362(1)
8	rs11783045	11056175	1.44e-08	74	16	16	8	2	32	rs13274039(1)	rs6999969(1)	rs11986748(1)	rs10088853(1)	rs13265553(1)	rs13276708(1)	rs13266785(1)	rs4291231(1)	rs10101329(1)	rs4840548(1)	rs3021497(1)	rs4642600(1)	rs2409719(1)	rs11776603(1)	rs17782536(1)	rs17726209(1)	rs2409730(1)	rs2736377(1)	rs2251301(1)	rs17796315(1)	rs10091637(1)	rs2572426(1)	rs2736385(1)	rs1369368(1)	rs2409754(1)	rs3808515(1)	rs2256016(1)	rs2409773(1)	rs11784016(1)	rs2264306(1)	rs1692821(1)
15	rs12914489	74187937	1.53e-08	33	2	3	18	5	5	rs2127016(1)	rs923118(1)	rs11854957(1)	rs3888004(1)	rs3848161(1)	rs11630317(1)	rs12912578(1)	rs409856(1)	rs12907503(1)	rs12899173(1)	rs12915891(1)	rs971757(1)	rs971755(1)	rs11857410(1)	rs733163(1)	rs12912258(1)	rs11639369(1)
11	rs3802924	133827733	1.53e-08	11	1	0	0	0	10	rs329637(1)
9	rs9298995	4145340	1.55e-08	17	0	1	1	7	8	rs10974337(1)	rs13299289(1)	rs6476808(1)	rs7850510(1)	rs10758560(1)
11	rs2697923	47363215	1.62e-08	37	4	10	14	2	7	rs3740976(1)	rs2290148(1)	rs11039183(1)	rs7124958(1)	rs4752983(1)	rs2290146(1)	rs3729802(1)	rs11570115(1)	rs10769253(1)	rs10769255(1)	rs7941404(1)	rs11039482(1)
11	rs876064	64037033	1.62e-08	62	18	5	3	8	28	rs641811(1)	rs7123026(1)	rs17773078(1)	rs12419038(1)	rs2096706(1)	rs11231713(1)	rs7103915(1)	rs1011219(1)	rs915987(1)	rs694739(1)	rs574087(1)	rs499425(1)	rs663743(1)	rs1199046(1)	rs612448(1)	rs600377(1)	rs541207(1)	rs538147(1)	rs645078(1)	rs11606081(1)	rs10897487(1)	rs4930168(1)	rs1320628(1)	rs11231787(1)	rs11601686(1)	rs4963223(1)	rs4930175(1)	rs11603861(1)
6	rs13199366	100826232	1.63e-08	18	4	0	0	0	14	rs13209418(1)	rs1506085(1)	rs3734358(1)
5	rs12658319	153551892	1.63e-08	102	15	24	2	20	41	rs17115481(1)	rs10055843(1)	rs12054772(1)	rs2033195(1)	rs6890277(1)	rs815607(1)	rs815608(1)	rs815609(1)	rs815611(1)	rs17536714(1)	rs815615(1)	rs815616(1)	rs1834944(1)	rs10062124(1)	rs4958701(1)	rs10066722(1)	rs7719786(1)	rs1428118(1)	rs1428119(1)	rs1346482(1)	rs1346483(1)	rs13177936(1)	rs7715256(1)	rs7719067(1)	rs4569924(1)	rs7708584(1)	rs7707628(1)	rs6580054(1)	rs2099044(1)	rs4958709(1)	rs4958362(1)	rs4958710(1)	rs4958363(1)	rs1002020(1)	rs4958711(1)	rs12652187(1)	rs11167664(1)	rs12652277(1)	rs12652301(1)	rs13162836(1)
1	rs6695170	107163389	1.67e-08	109	2	20	22	5	60	rs12140817(1)	rs6697697(1)	rs12066688(1)	rs10881440(1)	rs12734067(1)	rs6582980(1)	rs10881441(1)	rs10881442(1)	rs10881443(1)	rs4393186(1)	rs6703591(1)	rs4311915(1)	rs4494161(1)	rs4462181(1)	rs4336881(1)	rs4385746(1)	rs12138646(1)	rs11589101(1)	rs4244116(1)	rs7520289(1)	rs4914984(1)	rs4914985(1)	rs7340024(1)	rs4620573(1)	rs17017475(1)	rs4262573(1)	rs11184971(1)	rs1401830(1)	rs2316174(1)	rs11184977(1)	rs7532611(1)	rs9887893(1)	rs2176758(1)	rs2139463(1)	rs1401832(1)	rs12033361(1)	rs1028220(1)	rs996591(1)	rs6686425(1)	rs1519883(1)
10	rs7083507	11163048	1.72e-08	4	0	0	0	0	4	rs17375100(1)
2	rs1431087	226483833	1.73e-08	69	2	24	7	7	29	rs6711137(1)	rs10432453(1)	rs13428386(1)	rs936070(1)	rs936069(1)	rs6436574(1)	rs6436576(1)	rs16866682(1)	rs7597996(1)	rs13400632(1)	rs12994235(1)	rs3791734(1)	rs10180401(1)	rs4627553(1)	rs4641920(1)	rs6750609(1)	rs6729574(1)	rs13431222(1)	rs6753335(1)	rs16866695(1)	rs2014896(1)	rs4675001(1)	rs10191337(1)	rs6723888(1)	rs10197853(1)	rs13421117(1)	rs2396261(1)	rs6436579(1)	rs6436580(1)	rs6725873(1)	rs10184774(1)	rs17411259(1)
13	rs7319883	66939588	1.87e-08	14	1	0	0	1	12	rs1831972(1)	rs9317588(1)
9	rs3793603	23813100	1.92e-08	12	4	0	0	0	8	rs17550617(1)
12	rs10850805	117695594	1.95e-08	42	0	4	10	26	2	rs1472522(1)	rs2036311(1)	rs7315039(1)	rs2270791(1)	rs12368232(1)	rs11068384(1)	rs12302515(1)	rs868757(1)	rs3817015(1)	rs10850789(1)	rs11068387(1)	rs10161283(1)	rs10161089(1)	rs10850791(1)	rs2133678(1)	rs10850794(1)	rs10850795(1)	rs2036312(1)	rs4766834(1)	rs11068428(1)	rs1093330(1)	rs2293052(1)	rs3825102(1)	rs530393(1)	rs561712(1)	rs551846(1)	rs549098(1)
2	rs11684042	145684278	1.96e-08	30	0	1	2	4	23	rs6738560(1)	rs11674165(1)	rs786222(1)	rs17408036(1)	rs786247(1)	rs2950790(1)	rs13386034(1)	rs2246363(1)	rs1371045(1)	rs2256602(1)	rs13389190(1)	rs13428423(1)	rs7607110(1)	rs1830319(1)	rs2381686(1)	rs2890769(1)	rs1125128(1)	rs6430078(1)
8	rs7460521	64971829	2e-08	58	4	22	19	0	13	rs2100347(1)	rs763842(1)	rs763843(1)	rs4737183(1)	rs4737184(1)	rs705980(1)	rs705983(1)	rs7826723(1)	rs1010034(1)	rs1838421(1)	rs13257326(1)	rs7841320(1)	rs4147347(1)	rs13267296(1)	rs13254359(1)	rs2083998(1)	rs13248130(1)	rs13271001(1)	rs17220928(1)	rs13259129(1)	rs1485506(1)
18	rs1942026	35392073	2.01e-08	47	0	0	2	10	35	rs1187244(1)	rs9955935(1)	rs9955721(1)	rs1787071(1)	rs1787068(1)	rs1787067(1)	rs1786957(1)	rs8096603(1)	rs8096261(1)	rs969040(1)	rs1632709(1)	rs1786966(1)	rs1648910(1)	rs1787054(1)	rs1786970(1)	rs1786971(1)	rs1627987(1)	rs1787083(1)	rs1623618(1)	rs1787082(1)	rs1786939(1)	rs1786940(1)	rs948582(1)	rs1787087(1)	rs1942028(1)	rs5009667(1)	rs11082025(1)	rs4239400(1)	rs11659297(1)	rs11082026(1)	rs5015830(1)	rs1001683(1)	rs1942024(1)	rs12607127(1)	rs7236830(1)	rs7236386(1)
11	rs7106355	90017885	2.05e-08	204	50	88	49	15	2	rs1347593(1)	rs7952498(1)	rs7945906(1)	rs11018662(1)	rs1488901(1)	rs2388201(1)	rs2388200(1)	rs4545559(1)	rs10830291(1)	rs1552518(1)	rs2130015(1)	rs11018664(1)	rs10501707(1)	rs4753222(1)	rs10830296(1)	rs7101903(1)	rs533727(1)	rs564064(1)	rs536436(1)	rs1201517(1)	rs541727(1)	rs559133(1)	rs520751(1)	rs568381(1)	rs520547(1)	rs512285(1)	rs521051(1)	rs520077(1)	rs2510752(1)	rs532148(1)	rs577325(1)	rs579184(1)	rs512505(1)	rs491196(1)	rs547636(1)	rs493622(1)	rs562160(1)	rs500872(1)	rs7945311(1)	rs7946306(1)
6	rs683831	143055561	2.39e-08	5	1	0	0	0	4	rs561304(1)
5	rs9314089	93138165	2.41e-08	55	0	0	0	30	25	rs17083297(1)	rs7702348(1)	rs6898507(1)	rs7729237(1)	rs7723944(1)	rs6881815(1)	rs7730993(1)	rs2119449(1)	rs17083337(1)	rs10066088(1)	rs6879620(1)	rs2344918(1)	rs6556834(1)	rs7713956(1)	rs7715555(1)	rs10866759(1)	rs2924374(1)	rs1453003(1)	rs2924375(1)	rs1869277(1)	rs1031422(1)	rs1901736(1)	rs4869203(1)	rs4607342(1)	rs4380636(1)	rs1349711(1)	rs10057664(1)	rs6893023(1)	rs4869204(1)	rs7710880(1)	rs2045019(1)	rs7736892(1)	rs6556839(1)	rs1026281(1)	rs10514378(1)	rs12653528(1)	rs6874223(1)	rs10066323(1)	rs11135397(1)	rs1453002(1)
9	rs2378665	86734219	2.48e-08	15	6	1	2	0	6	rs4471123(1)
2	rs4665551	23338192	2.49e-08	21	0	0	0	2	19	rs12466137(1)	rs4665549(1)	rs17044783(1)	rs1374458(1)	rs1374457(1)	rs10177175(1)	rs2339727(1)	rs1867915(1)	rs4665199(1)	rs4665550(1)
14	rs12432600	41853509	2.51e-08	46	5	19	0	5	17	rs17608359(1)	rs17111944(1)	rs1431046(1)	rs3910110(1)	rs17781156(1)	rs17181392(1)	rs12435856(1)	rs17181406(1)	rs7155420(1)	rs12434244(1)	rs12435840(1)
2	rs10172574	142490499	2.54e-08	12	2	2	0	1	7	rs906649(1)
4	rs1995910	28385835	2.64e-08	169	83	13	8	7	58	rs4423858(1)	rs557840(1)	rs1282883(1)	rs1397439(1)	rs4692318(1)	rs6837053(1)	rs1355333(1)	rs7693080(1)	rs10939209(1)	rs7677277(1)	rs7678223(1)	rs4571317(1)	rs4411981(1)	rs4429724(1)	rs10939210(1)	rs10939211(1)	rs1024120(1)	rs986866(1)	rs1510699(1)	rs11935060(1)	rs2048381(1)	rs6448577(1)	rs1510700(1)	rs1510701(1)	rs1510702(1)	rs1510705(1)	rs2309787(1)	rs2309788(1)	rs2871335(1)	rs7667996(1)	rs7668927(1)	rs1397438(1)	rs10000497(1)	rs12502699(1)	rs12502704(1)	rs1797046(1)	rs16880619(1)	rs10517146(1)	rs292025(1)	rs3907987(1)
1	rs11579246	50559162	2.73e-08	44	28	5	7	0	4	rs10493135(1)
2	rs6727888	62887884	2.83e-08	89	3	16	19	19	32	rs11676135(1)	rs4671044(1)	rs4671045(1)	rs10204410(1)	rs7558681(1)	rs7583570(1)	rs6752010(1)	rs2421712(1)	rs1997246(1)	rs1527959(1)	rs6705835(1)	rs6545968(1)	rs1386399(1)	rs2421713(1)	rs11125941(1)	rs974345(1)	rs1872789(1)	rs2204655(1)	rs2204656(1)	rs1534418(1)	rs1534419(1)	rs1534420(1)	rs10177638(1)	rs1038570(1)	rs1487074(1)	rs6545969(1)	rs6757128(1)	rs181723(1)	rs17027098(1)	rs360789(1)	rs360790(1)	rs360793(1)	rs360794(1)	rs360796(1)	rs2969300(1)	rs2931488(1)	rs360805(1)	rs360806(1)	rs360804(1)	rs360799(1)
11	rs4755600	42435317	2.87e-08	38	2	5	6	19	6	rs11603484(1)	rs4756722(1)	rs1508521(1)	rs4756723(1)	rs7478877(1)	rs1381779(1)	rs7945049(1)	rs1508523(1)	rs4756724(1)	rs7941109(1)	rs10837846(1)	rs4237694(1)	rs1462674(1)	rs7124038(1)	rs7124170(1)	rs7932613(1)	rs1350960(1)	rs1508526(1)	rs7940289(1)	rs1381774(1)
16	rs13335882	5825965	3.05e-08	59	1	3	0	0	55	rs11648473(1)	rs6500717(1)	rs3848385(1)	rs11076962(1)	rs7190850(1)	rs2043633(1)	rs12597642(1)	rs9927114(1)	rs9927115(1)	rs9927274(1)	rs9929578(1)	rs9927357(1)	rs11648113(1)	rs9927934(1)	rs1436394(1)	rs9923553(1)	rs9936015(1)	rs9926811(1)	rs7198618(1)	rs7199564(1)	rs7202393(1)	rs7186704(1)	rs7187204(1)	rs7192968(1)	rs11861976(1)	rs13380566(1)	rs9931288(1)	rs9931383(1)	rs11860120(1)	rs11076968(1)	rs11861310(1)	rs12597118(1)	rs9927324(1)	rs9929536(1)	rs11076971(1)	rs2342735(1)	rs11864270(1)	rs11865092(1)	rs2164510(1)	rs4464081(1)
11	rs7120923	32600924	3.16e-08	10	0	0	0	1	9	rs7939376(1)
10	rs2175207	87357738	3.2e-08	19	1	5	0	0	13	rs12243608(1)	rs7919376(1)
9	rs1757945	81339569	3.21e-08	10	0	2	4	1	3	rs722642(1)
5	rs16873060	4237714	3.34e-08	11	0	1	3	4	3	rs12522730(1)
7	rs7808886	75908947	3.42e-08	26	2	1	10	10	3	rs7804806(1)	rs6465096(1)	rs6465097(1)	rs6465098(1)	rs10230188(1)	rs917424(1)	rs17149177(1)	rs962627(1)	rs17149187(1)	rs4728696(1)	rs999096(1)	rs4728712(1)
8	rs7839989	133796266	3.46e-08	38	0	0	0	3	35	rs2884203(1)	rs2472545(1)	rs1916273(1)	rs1916272(1)	rs1916271(1)	rs2467993(1)	rs2142377(1)	rs2205450(1)	rs2472547(1)	rs2472548(1)	rs880073(1)	rs2244060(1)	rs17683567(1)	rs180193(1)	rs180194(1)	rs180195(1)	rs180205(1)	rs180206(1)	rs180207(1)	rs180208(1)	rs180217(1)	rs180219(1)	rs180223(1)	rs2069550(1)	rs853311(1)	rs864898(1)	rs853326(1)
1	rs10913910	171845785	3.5e-08	20	3	2	2	1	12	rs4916401(1)	rs6425479(1)	rs12075807(1)	rs12091015(1)
14	rs3783384	103351830	3.52e-08	14	0	0	0	8	6	rs8008676(1)	rs3818287(1)	rs7142173(1)
6	rs2272903	50786571	3.58e-08	81	48	5	9	1	18	rs16880328(1)	rs9395633(1)	rs9349561(1)	rs9395635(1)	rs9367420(1)	rs9369987(1)	rs16880876(1)	rs9381917(1)	rs3857597(1)	rs4642472(1)	rs9369990(1)	rs12215345(1)	rs6458752(1)	rs1161201(1)	rs968147(1)	rs2505283(1)	rs2147707(1)
17	rs7225947	50024368	3.67e-08	44	0	0	11	18	15	rs69178(1)	rs203042(1)	rs203044(1)	rs996379(1)	rs203049(1)	rs4794315(1)	rs1501253(1)	rs203050(1)	rs203051(1)	rs8069910(1)	rs1005092(1)	rs12950263(1)	rs8076286(1)	rs9915345(1)	rs9896168(1)	rs7226293(1)	rs7503570(1)	rs2191400(1)	rs11652898(1)	rs11079989(1)	rs9895521(1)	rs12949297(1)	rs8069722(1)	rs12604029(1)	rs7208977(1)	rs7210687(1)	rs17669852(1)	rs4641792(1)	rs4362436(1)	rs7219072(1)	rs9303595(1)	rs11871160(1)	rs11079992(1)
4	rs1595693	139043652	3.67e-08	25	4	0	1	9	11	rs6537055(1)	rs17233656(1)	rs1837393(1)	rs6848847(1)	rs6821580(1)	rs1439502(1)	rs7690051(1)	rs4863767(1)	rs4863771(1)	rs11100834(1)
15	rs8027457	99204101	3.69e-08	7	1	3	0	0	3	rs4966009(1)
18	rs2187543	53753106	3.73e-08	6	0	0	0	1	5	rs17090056(1)
1	rs12144378	214427919	3.86e-08	12	5	4	0	0	3	rs12726700(1)
12	rs753044	74489288	4.13e-08	180	79	24	12	15	50	rs17814521(1)	rs7138284(1)	rs7296704(1)	rs1439984(1)	rs1371576(1)	rs12312490(1)	rs994083(1)	rs10879670(1)	rs11179772(1)	rs12319422(1)	rs11179775(1)	rs1439982(1)	rs11179777(1)	rs11179778(1)	rs10879675(1)	rs10879676(1)	rs11610736(1)	rs10879683(1)	rs7315018(1)	rs2083397(1)	rs12825512(1)	rs7961693(1)	rs1371584(1)	rs2886023(1)	rs2053373(1)	rs11179799(1)	rs10879689(1)	rs10879691(1)	rs7953457(1)	rs1899005(1)	rs11179818(1)	rs10879694(1)	rs1899010(1)	rs4883503(1)	rs4883497(1)	rs6421244(1)	rs10879704(1)	rs10879705(1)	rs7311763(1)	rs11179833(1)
1	rs7551758	52274078	4.23e-08	27	3	5	11	5	3	rs2747526(1)	rs11205899(1)	rs6588415(1)	rs6663305(1)	rs2842584(1)	rs3121159(1)	rs2792593(1)	rs6588416(1)
2	rs893789	27183970	4.24e-08	81	6	9	13	0	53	rs3845684(1)	rs1007357(1)	rs2117274(1)	rs12992046(1)	rs2289017(1)	rs11692834(1)	rs999087(1)	rs7602471(1)	rs4665913(1)	rs3885083(1)	rs4665360(1)	rs13027445(1)	rs1560860(1)	rs7589183(1)	rs6547275(1)	rs7603056(1)	rs7589610(1)	rs13405539(1)	rs6710065(1)	rs6756245(1)	rs509047(1)	rs4665920(1)	rs7557229(1)	rs3843322(1)	rs12714002(1)	rs12618836(1)	rs12612619(1)	rs877274(1)	rs9309559(1)	rs1371614(1)	rs3769135(1)	rs3769136(1)	rs3769137(1)	rs3769138(1)	rs10181727(1)	rs1057115(1)	rs4665930(1)	rs11902826(1)	rs7585127(1)	rs4233714(1)
21	rs8129315	46498863	4.29e-08	34	0	7	23	0	4	rs2838768(1)	rs2838833(1)	rs2838834(1)	rs2838840(1)	rs2838842(1)	rs1999334(1)	rs1006779(1)	rs2838845(1)	rs8126930(1)	rs2236445(1)	rs1056099(1)	rs2838854(1)	rs2838857(1)	rs3673(1)	rs2256000(1)	rs2838862(1)
15	rs4887111	74028285	4.32e-08	7	6	0	0	0	1	rs7162423(1)
22	rs9627391	46447097	4.33e-08	1	0	0	0	0	1	rs7291412(1)
1	rs2335077	107573565	4.51e-08	19	0	0	0	15	4	rs11185037(1)	rs4118321(1)	rs10218457(1)	rs10218458(1)	rs10494057(1)	rs4118325(1)	rs17018185(1)	rs2232016(1)
13	rs4885633	80043855	4.73e-08	94	11	5	10	29	39	rs7982730(1)	rs1408658(1)	rs1752649(1)	rs12871015(1)	rs9545076(1)	rs7332367(1)	rs7981067(1)	rs7996652(1)	rs9574409(1)	rs9565489(1)	rs3742117(1)	rs7319320(1)	rs7987769(1)	rs2274555(1)	rs3752994(1)	rs9318623(1)	rs7327386(1)	rs7998837(1)	rs9318625(1)	rs9530901(1)	rs2182873(1)	rs2025913(1)	rs2057573(1)	rs7332913(1)	rs9545083(1)	rs9545085(1)	rs9545086(1)	rs9545087(1)	rs7319252(1)	rs7327603(1)	rs9318634(1)	rs2182010(1)	rs4146473(1)	rs1324868(1)	rs7329331(1)	rs7336581(1)	rs3742122(1)	rs9574416(1)	rs9530914(1)	rs6563104(1)
10	rs10995441	64869239	4.73e-08	88	0	1	2	20	65	rs11813180(1)	rs10761691(1)	rs10822124(1)	rs10761694(1)	rs1396962(1)	rs4746866(1)	rs12412372(1)	rs10761703(1)	rs10761707(1)	rs10995439(1)	rs10761708(1)	rs10995440(1)	rs3211105(1)	rs4379723(1)	rs12413730(1)	rs1579045(1)	rs11819167(1)	rs10822148(1)	rs1904295(1)	rs10761728(1)	rs7082090(1)	rs9414780(1)	rs6479891(1)	rs7081614(1)	rs10761730(1)	rs10822150(1)	rs9415680(1)	rs7909555(1)	rs9415682(1)	rs10761733(1)	rs10740110(1)	rs10995493(1)	rs9414788(1)	rs12773283(1)	rs7100372(1)	rs4133250(1)	rs10740117(1)	rs6479894(1)	rs7091664(1)	rs10761746(1)
14	rs10483676	57322091	4.91e-08	10	0	1	0	0	9	rs17092284(1)
1	rs17785382	53707953	4.92e-08	28	3	0	3	2	20	rs12737375(1)	rs3737984(1)	rs5174(1)	rs10788950(1)	rs11206127(1)	rs12031155(1)	rs3737983(1)	rs2297663(1)	rs4623641(1)	rs10399827(1)	rs1288503(1)	rs1288502(1)	rs958825(1)	rs11206139(1)
1	rs488359	37163656	4.98e-08	33	15	0	1	3	14	rs12144657(1)	rs4653211(1)	rs1876258(1)	rs4652922(1)	rs11263943(1)	rs7549591(1)	rs537958(1)
[truncated: 292 more columns]

[truncated: 23 more sheets: ST10, ST11, ST12, ST13, ST14, ST15, ST16, ST17, ST18, ST19, ST20, ST21, ST22, ST23, ST24, ST25, ST26, ST27, ST28, ST29 …]
